# Supplementary material for: A large-scale, in vivo transcription factor screen defines bivalent chromatin as a key property of regulatory factors mediating Drosophila wing development
Source: PubMed Central journal article supplement — Genome Res. 2015 Apr;25(4):514–23. doi: 10.1101/gr.181305.114 (PMC4381523; doi:10.1101/gr.181305.114), 2015-04

# Supplemental Figure S6

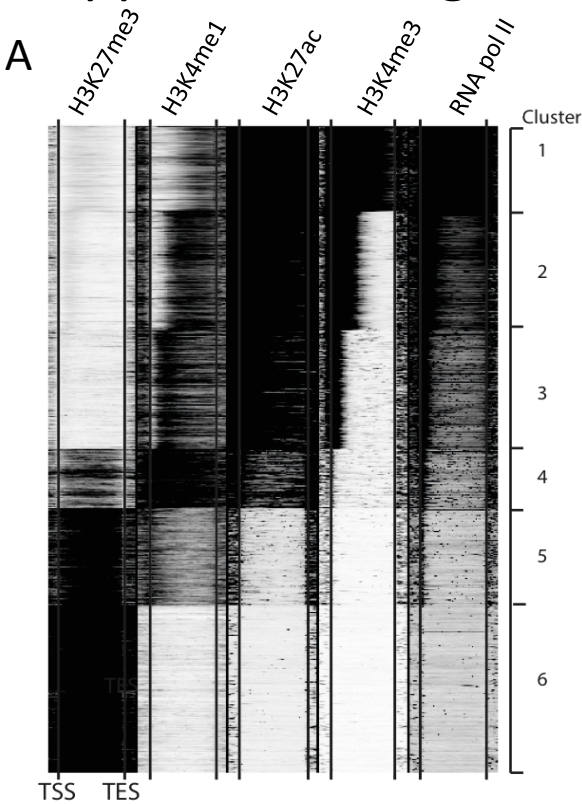

**B** Correlation in gene content between S2- and wing disc-derived clusters

|   |         | Wing disc |      |      |      |      |      |        |
|---|---------|-----------|------|------|------|------|------|--------|
|   | cluster | 1         | 2    | 3    | 4    | 5    | 6    | Sum    |
|   | S2      | 1         | 1278 | 525  | 35   | 131  | 65   | 88     |
| 2 |         | 131       | 1268 | 1377 | 210  | 101  | 190  | 3277   |
| 3 |         | 30        | 18   | 459  | 419  | 203  | 938  | 2067   |
| 4 |         | 9         | 9    | 48   | 200  | 297  | 1073 | 1636   |
| 5 |         | 3         | 1    | 19   | 67   | 97   | 762  | 949    |
| 6 |         | 12        | 0    | 38   | 144  | 266  | 3229 | 3689   |
|   | Sum     | 1463      | 1821 | 1976 | 1171 | 1029 | 6280 | 13740* |

\* Overall, there are 13,740 genes in common between the wing disc and S2-derived clusters. The table shows the number of genes in common for each cluster between the two experimental systems. We note that some genes were not assigned to any cluster, likely due to very low read coverage, and these were hence not included in this table.

**C** % genes in cluster covered by each chromatin color

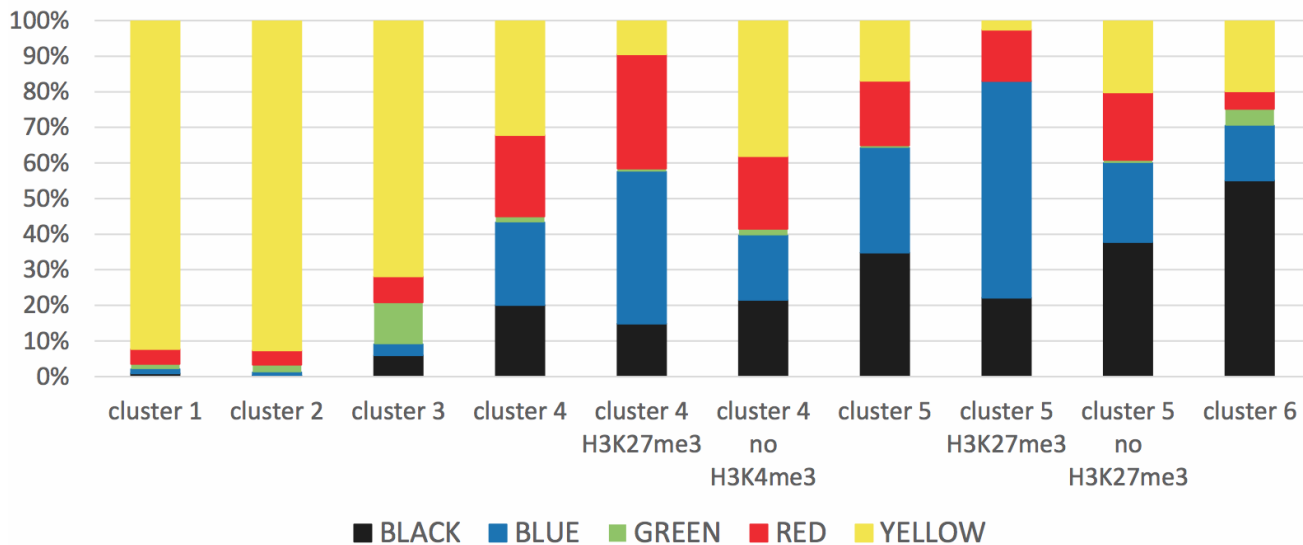

Supplement: supp_gr.181305.114_Supp_Figure6.pdf [file supp_gr.181305.114_Supp_Figure6.pdf]
