# Supplementary material for: A large-scale, in vivo transcription factor screen defines bivalent chromatin as a key property of regulatory factors mediating Drosophila wing development
Source: HighWire-hosted journal article supplement (doi:10.1101/gr.181305.114), 2015-01-07
Supplement: Supp_Table1.xlsx [file Supp_Table1.xlsx]

## Sheet: 1. TF in vivo library
						misexpression	misexpression		RNAi	RNAi
CG#	FBID KEY	name	symbol	DNA binding domain	chromatin cluster	MS1096-Gal4 males	MS1096-Gal4 females	remarks	MS1096-Gal4 males	MS1096-Gal4 females	remarks
CG15514	FBgn0039712	-	CG15514	zf-BED	1	+	no	dorsal bend	+	no	dorsal bend
CG17117	FBgn0001235	homothorax	hth		1	+	+	dorsal, cross vein loss	+	+	larger
CG8365	FBgn0000591	Enhancer of split m8, helix-loop-helix	E(spl)m8-HLH	HLH	1	+	+	size normal but strong vein loss	+	+	round
CG10159	FBgn0015602	Boundary element-associated factor of 32kD	BEAF-32	zf-BED	1	+	no	roundish	no	no
CG8361	FBgn0002633	Enhancer of split m7, helix-loop-helix	E(spl)m7-HLH	HLH	1	+	no	dorsal bend, some veins missing	no	no
CG18619	FBgn0032202	-	CG18619	bZIP_1	1	+	+	many extra veins
CG2050	FBgn0002780	modulo	mod		1	+	+	dorsal
CG7041	FBgn0030082	Heterochromatin Protein 1b	HP1b		1	+	+	dorsal bend, vein patterning defects
CG8365	FBgn0000591	Enhancer of split m8, helix-loop-helix	E(spl)m8-HLH	HLH	1	+	+	vein loss, bristle defects
CG8359	FBgn0037634	hinge2	hng2		1	++	+	females A/P down bend	++	+	round
CG9954	FBgn0034534	maf-S	maf-S	bZIP_Maf	1	++	no	extra cross vein	no	no
CG14548	FBgn0002733	Enhancer of split mbeta, helix-loop-helix	E(spl)mbeta-HLH	HLH	1	++	+	strong veins loss
CG8346	FBgn0002609	Enhancer of split m3, helix-loop-helix	E(spl)m3-HLH	HLH	1	++	+	dorsal bend
CG7959	FBgn0013753	Big brother	Bgb	CBF_beta	1	+++	++
CG8478	FBgn0037746	-	CG8478	zf-C2H2	1	+++/lethal	+++/lethal		+	+	round
CG3445	FBgn0035997	pleiohomeotic like	phol	zf-C2H2	1	lethal	+++		+	no	weak A/P small
CG3758	FBgn0001981	escargot	esg	zf-C2H2	1	lethal	+++/lethal		+	no	weak dorsal, A/P small
CG2116	FBgn0030003	-	CG2116	zf-C2H2	1	lethal	+++/++	dorsal bend, extra veins	no	no
CG31460	FBgn0051460	-	CG31460		1	lethal	+++		no	no
CG17958	FBgn0003512	Serendipity delta	Sry-delta	zf-C2H2	1	lethal	++
CG2275	FBgn0001291	Jun-related antigen	Jra	Jun	1	lethal	+++
CG4217	FBgn0038805	mitochondrial transcription factor A	TFAM	HMG_box	1	lethal	lethal
CG1832	FBgn0032979	Chromatin-linked adaptor for MSL proteins	Clamp	zf-C2H2	1	lethal	+++
CG1007	FBgn0000575	extra macrochaetae	emc	HLH	1	no	no		+	+	dorsal
CG11301	FBgn0034726	Mesoderm-expressed 4	Mes4	CBFD_NFYB_HMF	1	no	no		no	no
CG13123	FBgn0032150	-	CG13123	zf-AD	1	no	no
CG14860	FBgn0038273	-	CG14860	THAP	1	no	no
CG15736	FBgn0043001	Chromatin accessibility complex 16kD protein	Chrac-16	CBFD_NFYB_HMF	1	no	no
CG1621	FBgn0263240	Corepressor of Pangolin	Coop		1	no	no
CG17361	FBgn0036395	-	CG17361	zf-AD	1	no	no
CG17829	FBgn0025635	-	CG17829	zf-C2H2	1	no	no
CG17950	FBgn0004362	High mobility group protein D	HmgD	HMG_box	1	no	no
CG30077	FBgn0050077	Biogenesis of lysosome-related organelles complex 1, subunit 1	Blos1		1	no	no
CG33213	FBgn0053213	-	CG33213	zf-C2H2	1	no	no
CG3941	FBgn0034878	pita	pita	zf-AD	1	no	no
CG4185	FBgn0028926	Negative Cofactor 2beta	NC2beta	CBFD_NFYB_HMF	1	no	no
CG6121	FBgn0026080	Tip60	Tip60	zf-C2H2	1	no	no
CG6272	FBgn0036126	-	CG6272	bZIP_1	1	no	no
CG6808	FBgn0037921	-	CG6808	zf-AD	1	no	no
CG8396	FBgn0015299	Single stranded-binding protein c31A	Ssb-c31a		1	no	no
CG8506	FBgn0261064	Rabenosyn-5	Rbsn-5	zf-AD	1	no	no
CG9437	FBgn0034599	hinge1	hng1		1	no	no
CG9705	FBgn0036661	-	CG9705	CSD	1	no	no
CG9890	FBgn0034814	-	CG9890	zf-C2H2	1	no	no
CG1663	FBgn0033449	-	CG1663	zf-C2H2	1	no	no
CG5245	FBgn0038047	-	CG5245	zf-C2H2	1	no	no
CG4043	FBgn0037815	Rrp46	Rrp46	#N/A	1	no	no
CG13951	FBgn0016970	lethal (2) k10201	l(2)k10201	zf-C2H2	1	no	no
CG12659	FBgn0040929	-	CG12659	YL1_C	2	+	no	weak	++	no	fail to unfold
CG15889	FBgn0038128	Ravus	Ravus		2	+	no	larger (A/P)	no	no
CG17186	FBgn0038741	-	CG17186	zf-C2H2	2	+	+		no	no
CG3998	FBgn0022720	Zinc finger protein 30C	zf30C	zf-C2H2	2	+	no	extraveins, round	no	no
CG6689	FBgn0037877	-	CG6689	THAP	2	+	+	dorsal	no	no
CG10270	FBgn0022699	D19B	D19B	zf-AD	2	+	no	roundish, weak
CG2199	FBgn0035213	-	CG2199	zf-C3HC4	2	+	no	patterning defect
CG43343	FBgn0263047	-	CG43343		2	+	+	blistered, extra veins
CG3995	FBgn0038472	-	CG3995	zf-BED	2	+	no	extra veins, weak
CG8159	FBgn0037619	-	CG8159	zf-AD	2	+	no	weak, extra veins
CG6683	FBgn0035902	-	CG6683	Myb_DNA-binding	2	+	no	extra veins
CG7386	FBgn0035691	-	CG7386	zf-AD	2	+	no	extra veins
CG10269	FBgn0022935	D19A	D19A	zf-AD	2	+	no	extra veins
CG4817	FBgn0010278	Structure specific recognition protein	Ssrp	#N/A	2	+	no	extra veins
CG6276	FBgn0038316	-	CG6276		2	+	+	dorsal bend, misspatterned, extra veins
CG4491	FBgn0005771	no ocelli	noc	zf-C2H2	2	++	+		+	+	A/P small
CG10209	FBgn0033971	-	CG10209		2	++	+	females larger, males small	++	+	large
CG4694	FBgn0001185	hermaphrodite	her	zf-C2H2	2	++	+	dorsal bend, some veins missing	++	no	don´t unfold
CG18740	FBgn0002783	moira	mor	#N/A	2	++	+	extra veins	+++	++
CG14711	FBgn0037922	-	CG14711	zf-AD	2	++	+	A/P small
CG4148	FBgn0001990	weckle	wek	zf-AD	2	++	+
CG3065	FBgn0034946	-	CG3065	zf-C2H2	2	++	++
CG10949	FBgn0032858	-	CG10949	AT_hook	2	+++	++/+++	dorsal bend	+	+	round
CG9045	FBgn0002914	Myb oncogene-like	Myb	Myb_DNA-binding	2	+++	++	blistered	+	+	dorsal bend
CG5838	FBgn0015664	DNA replication-related element factor	Dref	zf-BED	2	+++	+++		++	++	small, crumbled
CG1024	FBgn0027514	-	CG1024	zf-C2H2	2	+++	++		+++	++	crumbled
CG5034	FBgn0032223	GATAd	GATAd		2	+++	++
CG5669	FBgn0039169	Sp1-like factor for pairing sensitive-silencing	Spps	zf-C2H2	2	+++	+++
CG7583	FBgn0020496	C-terminal Binding Protein	CtBP	#N/A	2	+++	++
CG7752	FBgn0259785	putzig	pzg	zf-C2H2	2	+++	+++
CG7938	FBgn0003511	Serendipity beta	Sry-beta	zf-AN1	2	+++	++
CG9495	FBgn0003334	Sex comb on midleg	Scm	AT_hook	2	+++	+++
CG6215	FBgn0015025	CKII-alpha subunit interactor-1	CkIIalpha-i1	zf-C2H2	2	+++	+++
CG12391	FBgn0033581	-	CG12391	zf-AD	2	+++	++
CG7357	FBgn0038551	-	CG7357	zf-AD	2	+++/lethal	+++		++	lethal?	round
CG17802	FBgn0038549	-	CG17802	zf-AD	2	+++/lethal	+++		no	no
CG9139	FBgn0262937	Rabaptin-5-associated exchange factor for Rab5 ortholog (H. sapiens)	Rabex-5	zf-A2	2	+++/lethal	+++		no	no
CG9418	FBgn0026582	High mobility group protein 2	Hmg-2	HMG_box	2	+++/lethal	+++		no	no
CG9215	FBgn0030659	-	CG9215	zf-AD	2	lethal	lethal		+	+	larger, ventral bend
CG18764	FBgn0042205	-	CG18764	zf-AD	2	lethal	+++/++		++	+	round
CG3847	FBgn0029867	-	CG3847	zf-C2H2	2	lethal	++	extra veins	lethal	+++
CG33336	FBgn0039044	p53	p53	P53	2	lethal	+++		no	no
CG7928	FBgn0039740	-	CG7928	zf-C2H2	2	lethal	+++		no	no
CG8314	FBgn0034057	-	CG8314	zf-DHHC	2	lethal	+++		no	no
CG1454	FBgn0005642	wings down	wdn	zf-C2H2	2	lethal	++
CG17257	FBgn0031495	beta4GalNAcTB pilot	GABPI	zf-DHHC	2	lethal	+++/lethal
CG4427	FBgn0043364	cabut	cbt	zf-C2H2	2	lethal	lethal
CG6813	FBgn0037923	-	CG6813		2	lethal	+++
CG10565	FBgn0037051	-	CG10565	DnaJ	2	no	no		+	+
CG11992	FBgn0014018	Relish	Rel	RHD	2	no	no		+	+	round
CG4654	FBgn0011763	DP transcription factor	Dp	E2F_TDP	2	no	no		+	+	dorsal bend
CG10267	FBgn0037446	Zinc-finger protein	Zif	zf-AD	2	no	no		lethal	+++
CG11398	FBgn0040366	-	CG11398	zf-C2H2	2	no	no		lethal/+++	++	dorsal bend
CG1071	FBgn0024371	E2F transcription factor 2	E2f2	E2F_TDP	2	no	no		no	no
CG5083	FBgn0038390	Retinoblastoma-family protein 2	Rbf2		2	no	no		no	no
CG10318	FBgn0034650	Negative Cofactor 2alpha	NC2alpha	CBFD_NFYB_HMF	2	no	no
CG11695	FBgn0030316	-	CG11695	zf-AD	2	no	no
CG11723	FBgn0031391	-	CG11723		2	no	no
CG11971	FBgn0260243	Enhancer of variegation 3-9	E(var)3-9	zf-AD	2	no	no
CG11984	FBgn0037655	-	CG11984	ZZ	2	no	no
CG12942	FBgn0033569	-	CG12942	zf-AD	2	no	no
CG14667	FBgn0037317	-	CG14667	zf-AD	2	no	no
CG14710	FBgn0037920	-	CG14710	zf-AD	2	no	no
CG14941	FBgn0000588	extra sexcombs	esc		2	no	no
CG14965	FBgn0035414	-	CG14965	THAP	2	no	no
CG15435	FBgn0031608	-	CG15435	zf-AD	2	no	no
CG15436	FBgn0031610	-	CG15436	zf-AD	2	no	no
CG1605	FBgn0025185	az2	az2	zf-C2H2	2	no	no
CG1620	FBgn0033183	-	CG1620	ELM2	2	no	no
CG17328	FBgn0028895	-	CG17328	zf-AD	2	no	no
CG17359	FBgn0036396	-	CG17359	zf-C4	2	no	no
CG17568	FBgn0032763	-	CG17568	zf-AD	2	no	no
CG17612	FBgn0031597	-	CG17612		2	no	no
CG17806	FBgn0038548	-	CG17806	zf-AD	2	no	no
CG1792	FBgn0039860	-	CG1792	zf-AD	2	no	no
CG18262	FBgn0030012	-	CG18262	zf-C2H2	2	no	no
CG2712	FBgn0024975	-	CG2712	zf-AD	2	no	no
CG2790	FBgn0027599	-	CG2790	DnaJ	2	no	no
CG2889	FBgn0030206	-	CG2889	zf-AD	2	no	no
CG30443	FBgn0050443	Optix-binding protein	Opbp	zf-C2H2	2	no	no
CG31365	FBgn0051365	-	CG31365	zf-AD	2	no	no
CG42727	FBgn0261680	-	CG42727		2	no	no
CG31441	FBgn0051441	-	CG31441	zf-AD	2	no	no
CG33133	FBgn0001133	grauzone	grau	zf-AD	2	no	no
CG4413	FBgn0038767	trade embargo	trem		2	no	no
CG4424	FBgn0038765	-	CG4424	zf-AD	2	no	no
CG4621	FBgn0032321	YL-1	YL-1	YL1	2	no	no
CG4707	FBgn0035036	-	CG4707	zf-AD	2	no	no
CG4730	FBgn0039355	-	CG4730	zf-AD	2	no	no
CG4820	FBgn0037876	-	CG4820	zf-AD	2	no	no
CG4854	FBgn0038766	-	CG4854	zf-AD	2	no	no
CG5196	FBgn0038039	-	CG5196	zf-DHHC	2	no	no
CG6338	FBgn0004510	Ets at 97D	Ets97D	SAM_PNT	2	no	no
CG6654	FBgn0038301	-	CG6654	zf-AD	2	no	no
CG6792	FBgn0032401	Promyelocytic leukemia zinc finger ortholog	Plzf	BTB	2	no	no
CG7471	FBgn0015805	Rpd3	Rpd3	#N/A	2	no	no
CG7562	FBgn0010287	TBP-related factor	Trf		2	no	no
CG8089	FBgn0033993	-	CG8089	zf-C2H2	2	no	no
CG8145	FBgn0037617	-	CG8145	zf-AD	2	no	no
CG8727	FBgn0023094	cycle	cyc	HLH	2	no	no
CG8924	FBgn0030710	-	CG8924	BTB	2	no	no
CG9233	FBgn0029173	fu2	fu2	zf-AD	2	no	no
CG9305	FBgn0032512	-	CG9305	Myb_DNA-binding	2	no	no
CG9415	FBgn0021872	X box binding protein-1	Xbp1	bZIP_2	2	no	no
CG9609	FBgn0030787	-	CG9609	zf-C2H2	2	no	no
CG9648	FBgn0017578	Max	Max	HLH	2	no	no
CG9793	FBgn0037620	ranshi	ranshi	zf-AD	2	no	no
CG9797	FBgn0037621	Motif 1 Binding Protein	M1BP	zf-AD	2	no	no
CG6093	FBgn0000018	abnormal oocyte	abo		2	no	no
CG2875	FBgn0029672	-	CG2875	CBF	2	no	no
CG6254	FBgn0037794	-	CG6254	zf-AD	2	no	no
CG10447	FBgn0032816	Nuclear factor Y-box B	Nf-YB	#N/A	2	no	no
CG5109	FBgn0003044	Polycomblike	Pcl	PHD	2	no	no
CG15812	FBgn0035405	piefke	pfk	BTB	2	no	no
CG11414	FBgn0035024	-	CG11414	zf-C3HC4	2	no	no
CG6769	FBgn0030878	-	CG6769	zf-C2H2	2	no	no
CG12219	FBgn0043796	-	CG12219	zf-AD	3	+	no	roundish	+	+	round
CG30020	FBgn0050020	-	CG30020	zf-AD	3	+	no	blistered, vein defects	++	++	crumbled
CG12399	FBgn0011648	Mothers against dpp	Mad	MH1	3	+	+	vein defects, slightly large	+++	++
CG10462	FBgn0032815	-	CG10462		3	+	no		no	no
CG17100	FBgn0259938	clockwork orange	cwo		3	+	no		no	no
CG12236	FBgn0029822	-	CG12236		3	+	no	extra cross vein at the wing tip
CG3075	FBgn0029905	Nuclear factor Y-box C	Nf-YC	CBFD_NFYB_HMF	3	+	+	extraveins
CG8591	FBgn0035769	CTCF	CTCF	AT_hook	3	+	+	dorsal bend
CG1647	FBgn0039602	-	CG1647		3	+	+	dorsal
CG6791	FBgn0037918	-	CG6791	zf-C4_Topoisom	3	+	no	extra veins
CG7987	FBgn0038244	-	CG7987	zf-C2H2	3	+	no	extra veins
CG3891	FBgn0035993	Nuclear factor Y-box A	Nf-YA	CBFB_NFYA	3	++	no		+	+	A/P large ventral bend
CG1775	FBgn0011655	Medea	Med	MH1	3	++	+		++	++
CG3143	FBgn0038197	forkhead box, sub-group O	foxo	Fork_head	3	++	+		++	+	dont unfold, round
CG33473	FBgn0040765	luna	luna	zf-C2H2	3	++	++	dorsal	++	+	round
CG12052	FBgn0005630	longitudinals lacking	lola	BTB	3	++	lethal		no	no
CG6627	FBgn0027453	DNZDHHC/NEW1 zinc finger protein 11	Dnz1	zf-DHHC	3	++	no	small, vein loss	no	no
CG1429	FBgn0011656	Myocyte enhancer factor 2	Mef2	SRF-TF	3	++	+	blistered, crumbled, A/P short
CG5965	FBgn0010328	without children	woc	zf-C3HC4	3	++	no	blistered
CG7839	FBgn0036124	-	CG7839	CBF	3	++	+	extra veins
CG8013	FBgn0020887	Su(z)12	Su(z)12	zf-C2H2	3	++	+	dorsal bend
CG8669	FBgn0000370	cryptocephal	crc	bZIP_1	3	++	+
CG8819	FBgn0033749	achintya	achi		3	++	no
CG13775	FBgn0031874	-	CG13775	zf-BED	3	++	++	round
CG10309	FBgn0038418	poils au dos	pad		3	++	+
CG42698	FBgn0261588	pou domain motif 3	pdm3	#N/A	3	++	+	extra veins, blistered
CG10321	FBgn0034643	-	CG10321	zf-AD	3	+++	+++		+	no	round
CG7413	FBgn0015799	Retinoblastoma-family protein	Rbf		3	+++	++		+	+	A/P small
CG8765	FBgn0036900	-	CG8765	Myb_DNA-binding	3	+++	++		lethal	lethal
CG30011	FBgn0050011	gemini	gem	CP2	3	+++	+++
CG6061	FBgn0033846	Myb-interacting protein 120	mip120		3	+++	+++
CG6143	FBgn0004401	Protein on ecdysone puffs	Pep	zf-C2H2	3	+++	+++
CG8092	FBgn0033998	relative of woc	row		3	+++	+++
CG9696	FBgn0020306	domino	dom		3	+++	++
CG5102	FBgn0000413	daughterless	da	HLH	3	+++	+++
CG4360	FBgn0038787	-	CG4360	zf-C2H2	3	+++/lethal	+++		no	no
CG34422	FBgn0085451	-	CG34422		3	+++/lethal	++	dorsal bend
CG33261	FBgn0013263	Trithorax-like	Trl	BTB	3	+++/lethal	lethal		+++	+++
CG43365	FBgn0263108	BTB-protein-VII	BtbVII	BTB	3	+++/lethal	++
CG11799	FBgn0036134	forkhead domain 68A	fd68A		3	+++/lethal	++	crumbled
CG31258	FBgn0086697	-	Cenp-C		3	+++/lethal	++
CG8367	FBgn0000289	combgap	cg	zf-C2H2	3	+++/lethal	+++
CG1233	FBgn0035137	-	CG1233	zf-C2H2	3	lethal	++		+	+
CG31388	FBgn0051388	-	CG31388	zf-AD	3	lethal	++	crumbled	+	+	round
CG9776	FBgn0027866	-	CG9776		3	lethal	+++		+	no	round
CG5249	FBgn0035625	Blimp-1	Blimp-1	SET	3	lethal	lethal		+++	++	crumbled
CG11172	FBgn0030505	NFAT homolog	NFAT		3	lethal	lethal		no	no
CG11247	FBgn0037120	-	CG11247	zf-C2H2	3	lethal	lethal		no	no
CG1407	FBgn0033474	-	CG1407	zf-DHHC	3	lethal	+++		no	no
CG6667	FBgn0260632	dorsal	dl	RHD	3	lethal	lethal		no	no
CG12223	FBgn0011764	Dorsal switch protein 1	Dsp1	HMG_box	3	lethal	lethal
CG14938	FBgn0020309	crooked legs	crol	zf-C2H2	3	lethal	lethal
CG18412	FBgn0004861	polyhomeotic proximal	ph-p		3	lethal	lethal
CG2711	FBgn0000520	deformed wings	dwg	zf-AD	3	lethal	++
CG3114	FBgn0005427	erect wing	ewg		3	lethal	+++
CG10543	FBgn0034570	-	CG10543		3	lethal	++	crumbled
CG3497	FBgn0004837	Suppressor of Hairless	Su(H)	TIG	3	lethal	lethal	die as late3rd instar larvae pre pupariation
CG11924	FBgn0000286	Chorion factor 2	Cf2	zf-C2H2	3	no	no		+	+	A/P small
CG3848	FBgn0023518	trithorax-related	trr		3	no	no		+	+	A/P small
CG10431	FBgn0032730	-	CG10431	THAP	3	no	no		+++	no	do not unfold
CG11456	FBgn0037031	-	CG11456		3	no	no		no	no
CG1529	FBgn0031144	-	CG1529	zf-C2H2	3	no	no		no	no
CG2262	FBgn0025800	Smad on X	Smox	MH1	3	no	no		no	no
CG8522	FBgn0261283	Helix loop helix protein 106	HLH106	HLH	3	no	no		no	no
CG8290	FBgn0026573	-	CG8290	zf-C3HC4	3	no	no
CG10147	FBgn0035702	-	CG10147	zf-AD	3	no	no
CG10979	FBgn0037379	-	CG10979	C1_4	3	no	no
CG11783	FBgn0015240	Hormone receptor-like in 96	Hr96	zf-C4	3	no	no
CG11902	FBgn0028647	-	CG11902		3	no	no
CG12196	FBgn0086908	eggless	egg	MBD	3	no	no
CG13399	FBgn0043002	Chromatin accessibility complex 14kD protein	Chrac-14	CBFD_NFYB_HMF	3	no	no
CG14513	FBgn0005596	yemanuclein	yem		3	no	no
CG15073	FBgn0034379	-	CG15073	zf-AD	3	no	no
CG42748	FBgn0261802	-	CG42748		3	no	no
CG16863	FBgn0028931	-	CG16863		3	no	no
CG1705	FBgn0002723	Methoprene-tolerant	Met		3	no	no
CG18011	FBgn0033491	-	CG18011	zf-C2H2	3	no	no
CG2129	FBgn0030008	-	CG2129	zf-C2H2	3	no	no
CG2702	FBgn0037540	PSEA-binding protein 95kD	Pbp95	Myb_DNA-binding	3	no	no
CG2714	FBgn0000376	deformed wings	dwg	Myb_DNA-binding	3	no	no
CG31510	FBgn0051510	-	CG31510		3	no	no
CG32264	FBgn0052264	-	CG32264	RPEL	3	no	no
CG42687	FBgn0261573	CoRest	CoRest	#N/A	3	no	no
CG3743	FBgn0040305	Metal response element-binding Transcription Factor-1	MTF-1	zf-C2H2	3	no	no
CG3815	FBgn0029861	-	CG3815	PHD	3	no	no
CG5748	FBgn0001222	Heat shock factor	Hsf		3	no	no
CG6686	FBgn0032388	-	CG6686	SART-1	3	no	no
CG6701	FBgn0033889	-	CG6701		3	no	no
CG7372	FBgn0036522	-	CG7372		3	no	no
CG8290	FBgn0026573	-	CG8290	zf-C3HC4	3	no	no
CG8599	FBgn0003598	Suppressor of variegation 3-7	Su(var)3-7		3	no	no
CG8933	FBgn0000611	extradenticle	exd	PBC	3	no	no
CG8961	FBgn0086350	teflon	tef	zf-C2H2	3	no	no
CG9088	FBgn0031759	little imaginal discs	lid	JmjN	3	no	no
CG42679	FBgn0261565	Limpet	Lmpt	LIM	3	no	no
CG2244	FBgn0027951	MTA1-like	MTA1-like		3	no	no
CG5654	FBgn0022959	ypsilon schachtel	yps	#N/A	3	no	no
CG12054	FBgn0039831	-	CG12054	zf-C2H2	3	no	no
CG3576	FBgn0040918	schlank	schlank	LAG1	4a	+	no		++	+	small, round
CG14029	FBgn0016076	vrille	vri		4a	+	+	weak	+++	+++
CG4496	FBgn0031894	-	CG4496	zf-C2H2	4a	+	no		no	no
CG7199	FBgn0015239	Hormone-receptor-like in 78	Hr78	zf-C4	4a	+	++	blistered	no	no
CG8704	FBgn0010109	deadpan	dpn	HLH	4a	+	+	dorsal bend, some veins missing	no	no
CG1244	FBgn0035357	-	MEP-1		4a	+	no	extra veins	no	no
CG6096	FBgn0002631	Enhancer of split m5, helix-loop-helix	E(spl)m5-HLH	HLH	4a	+	no	vein loss
CG8328	FBgn0002734	Enhancer of split mdelta, helix-loop-helix	E(spl)mdelta-HLH	HLH	4a	++	+	dorsal bend, some veins missing	no	no
CG6494	FBgn0001168	hairy	h	HLH	4a	++	+	dorsal bend
CG8333	FBgn0002735	Enhancer of split mgamma, helix-loop-helix	E(spl)mgamma-HLH	HLH	4a	++	+
CG9653	FBgn0024250	brinker	brk		4a	+++	+++		+	+	extra veins@posterior cross vein
CG7664	FBgn0001994	cropped	crp	HLH	4a	+++	++		lethal	++
CG3827	FBgn0004170	scute	sc	HLH	4a	+++	+++		no	no
CG3090	FBgn0005612	Sox box protein 14	Sox14		4a	+++	+++/++
CG33956	FBgn0001297	kayak	kay	bZIP_1	4a	lethal	++		+	+
CG13897	FBgn0035160	hinge3	hng3		4a	lethal	lethal		++	+	round
CG4158	FBgn0001983	worniu	wor	zf-C2H2	4a	lethal	++	extra veins	++	+	round
CG7101	FBgn0030963	-	CG7101	zf-C2H2	4a	lethal	+++/lethal		++	+	round, crumbled
CG1856	FBgn0003870	tramtrack	ttk	BTB	4a	lethal	+++
CG32772	FBgn0052772	-	CG32772	zf-C2H2	4a	lethal	+++/lethal
CG9745	FBgn0000412	D1 chromosomal protein	D1	AT_hook	4a	lethal	+++	dorsal
CG5557	FBgn0010768	squeeze	sqz	zf-C2H2	4a	lethal	lethal
CG17921	FBgn0010228	HMG protein Z	HmgZ	HMG_box	4a	lethal	+++
CG11450	FBgn0002931	net	net	HLH	4a	no	no		+	+	extra veins
CG5575	FBgn0011236	ken and barbie	ken	BTB	4a	no	no		lethal	lethal
CG11033	FBgn0037659	Lysine (K)-specific demethylase 2	Kdm2		4a	no	no		no	no
CG11405	FBgn0028550	Activating transcription factor 3	Atf3		4a	no	no		no	no
CG4029	FBgn0015396	jumeau	jumu	Fork_head	4a	no	no		no	no
CG1070	FBgn0261238	Alhambra	Alh		4a	no	no
CG12744	FBgn0033459	-	CG12744	zf-C2H2	4a	no	no
CG13493	FBgn0034667	cookie monster	comr		4a	no	no
CG1414	FBgn0024182	bobby sox	bbx	HMG_box	4a	no	no
CG3838	FBgn0032130	-	CG3838		4a	no	no
CG7099	FBgn0032517	-	CG7099		4a	no	no
CG9397	FBgn0086655	jing	jing	zf-C2H2	4a	no	no
CG9638	FBgn0037555	transcriptional Adaptor 2b	Ada2b	ZZ	4a	no	no
CG1374	FBgn0003866	teashirt	tsh		4a	no	no
CG2762	FBgn0003963	u-shaped	ush	zf-C2H2	4b	+	no	crumbled, extra veins	+	+
CG10488	FBgn0000625	eyegone	eyg	PAX	4b	+	+	dorsal bend, vein patterning defects
CG42865	FBgn0262139	trachealess	trh		4b	+	no	extra veins (posterior and distal)
CG5799	FBgn0020307	defective proventriculus	dve	Homeobox	4b	+	+	ventral, A/P large
CG43122	FBgn0262582	capicua	cic		4b	+	no	vein loss
CG3411	FBgn0004101	blistered	bs	SRF-TF	4b	++	+	vein loss	no	no
CG8676	FBgn0261239	Hormone receptor-like in 39	Hr39	zf-C4	4b	++	++		no	no
CG4761	FBgn0001323	knirps-like	knrl	zf-C4	4b	++	+	blistered
CG42281	FBgn0259176	bunched	bun	TSC22	4b	++	++	crumbled, famale wing margin defects
CG13316	FBgn0023215	Mnt	Mnt	HLH	4b	++	+	A/P small
CG3242	FBgn0004892	sister of odd and bowl	sob	zf-C2H2	4b	++	+	extra veins
CG10571	FBgn0015904	araucan	ara		4b	+++	+++		+	+	larger
CG3935	FBgn0000061	aristaless	al	Homeobox	4b	+++	++/+++		+	+	extra veins
CG5093	FBgn0035954	Dorsocross3	Doc3	T-box	4b	+++	++/+++	dorsal bend	+++	+
CG1028	FBgn0260642	Antennapedia	Antp		4b	+++	++/+++	vein loss	no	no
CG5133	FBgn0028789	Dorsocross1	Doc1	T-box	4b	+++	+	femals A/P bend down	no	no
CG10619	FBgn0003896	tailup	tup	LIM	4b	+++	++	huge notches in female, wings almost absent in males
CG12296	FBgn0013469	klumpfuss	klu	zf-C2H2	4b	+++	++
CG3886	FBgn0005624	Posterior sex combs	Psc		4b	+++	+++
CG10601	FBgn0014343	mirror	mirr	Homeobox	4b	+++	++
CG3978	FBgn0003117	pannier	pnr	GATA	4b	+++	++
CG9656	FBgn0001138	grain	grn	GATA	4b	+++	+++
CG34395	FBgn0085424	nubbin	nub	#N/A	4b	+++/lethal	++	dorsal veins missing	+	+	dorsal bend
CG6824	FBgn0003028	ovo	ovo	zf-C2H2	4b	+++/lethal	+++/lethal		+	+	A/P small
CG10197	FBgn0001319	knot	kn		4b	+++/lethal	+	dorsal bend	no	no
CG2988	FBgn0000576	empty spiracles	ems	Homeobox	4b	+++/lethal	++	blistered
CG10704	FBgn0036285	twin of eyg	toe	PAX	4b	lethal	+++		+	+	round
CG9015	FBgn0000577	engrailed	en	Homeobox	4b	lethal	lethal		+	no	cross vein loss
CG9930	FBgn0008646	E5	E5	Homeobox	4b	lethal	lethal		+	+	round
CG8404	FBgn0005613	Sox box protein 15	Sox15	HMG_box	4b	lethal	+++/++		+	+	A/P large
CG8127	FBgn0000568	Ecdysone-induced protein 75B	Eip75B		4b	lethal	lethal		+	+	ventral bend (weak)
CG3629	FBgn0000157	Distal-less	Dll	Homeobox	4b	lethal	+++/lethal		++	++	males small crumbled, femals larger ventral bend
CG4059	FBgn0001078	ftz transcription factor 1	ftz-f1		4b	lethal	+++/lethal		++	+	dorsal bend
CG42277	FBgn0259172	rotund	rn		4b	lethal	+++		++/+++	+	round
CG8544	FBgn0003345	scalloped	sd	TEA	4b	lethal	+++		+++	+++	crumbled
CG8376	FBgn0000099	apterous	ap	LIM	4b	lethal	++	crumbled	lethal	++	crumbled
CG10605	FBgn0015919	caupolican	caup	Homeobox	4b	lethal	+++		no	no
CG12287	FBgn0004394	POU domain protein 2	pdm2	HSF_DNA-bind	4b	lethal	lethal/++		no	no
CG12630	FBgn0028979	tiptop	tio		4b	lethal	lethal		no	no
CG17836	FBgn0261113	-	Xrp1		4b	lethal	+++		no	no
CG10021	FBgn0004893	brother of odd with entrails limited	bowl	zf-C2H2	4b	lethal	+++
CG17077	FBgn0003118	pointed	pnt	SAM_PNT	4b	lethal	+++/lethal
CG2956	FBgn0003900	twist	twi	HLH	4b	lethal	+++/++
CG31666	FBgn0086758	Chronologically inappropriate morphogenesis	chinmo	BTB	4b	lethal	+++
CG3851	FBgn0002985	odd skipped	odd	zf-C2H2	4b	lethal	+++
CG4220	FBgn0004858	elbow B	elB	zf-C2H2	4b	lethal	++
CG4717	FBgn0001320	knirps	kni	zf-C4	4b	lethal	lethal	+ once, lethal the other time?
CG2368	FBgn0263102	pipsqueak	psq	BTB	4b	lethal	+++
CG10798	FBgn0262656	diminutive	dm	HLH	4b	no	no		+	+
CG1765	FBgn0000546	Ecdysone receptor	EcR	zf-C4	4b	no	no		+	+	A/P large
CG42311	FBgn0259211	grainy head	grh		4b	no	no		+++	+++
CG17835	FBgn0001269	invected	inv	Homeobox	4b	no	no
CG8103	FBgn0262519	-	Mi-2		4b	no	no
CG15749	FBgn0030477	doublesex-Mab related 11E	dmrt11E		5a	+	no		+	+	round
CG14451	FBgn0037183	-	CG14451	zf-C2H2	5a	+	no	dorsal bend
CG4404	FBgn0030432	-	CG4404		5a	+	+	slightly larger
CG5393	FBgn0015903	apontic	apt		5a	++	+	blistered, extra veins	++	+	round
CG31955	FBgn0051955	-	CG31955	LIM	5a	++	++	crumbled	no	no
CG17888	FBgn0016694	PAR-domain protein 1	Pdp1	bZIP_1	5a	+++	++		+	no	dorsal, extra veins
CG10344	FBgn0034729	-	CG10344	zf-DHHC	5a	+++	+	dorsal bend
CG6913	FBgn0037937	48 related 3	Fer3	HLH	5a	+++/lethal	+++
CG33183	FBgn0000448	Hormone receptor-like in 46	Hr46	zf-C4	5a	lethal	lethal		++	+	ventral bend
CG18023	FBgn0004865	Ecdysone-induced protein 78C	Eip78C		5a	lethal	lethal		ND (Xchr)	+	dorsal bend
CG1864	FBgn0014859	Hormone receptor-like in 38	Hr38		5a	lethal	+++
CG31240	FBgn0011701	reversed polarity	repo	Homeobox	5a	lethal	+++
CG3726	FBgn0029824	-	CG3726	BTB	5a	lethal	lethal
CG12769	FBgn0033252	-	CG12769	zf-C2H2	5a	lethal	++
CG1048	FBgn0004054	zerknullt-related	zen2	Homeobox	5a	no	no		no	no
CG12075	FBgn0030065	-	CG12075		5a	no	no
CG31481	FBgn0051481	proboscipedia	pb		5a	no	no
CG3919	FBgn0036423	-	CG3919	Myb_DNA-binding	5a	no	no
CG11094	FBgn0000504	doublesex	dsx	DM	5b	+	+	round, vein loss	lethal/+++	+++
CG1322	FBgn0004606	Zn finger homeodomain 1	zfh1	zf-C2H2	5b	+	no	weak	no	no
CG3992	FBgn0003507	serpent	srp		5b	+	no	dorsal bend	no	no
CG7902	FBgn0004862	bagpipe	bap	Homeobox	5b	+	no	mild vein defects	no	no
CG11502	FBgn0003651	seven up	svp	zf-C4	5b	++	++	blistered	+	+
CG18455	FBgn0025360	Optix	Optix		5b	++	++	crumbled, blistered	+	+
CG11922	FBgn0004898	forkhead domain 96Cb	fd96Cb	Fork_head	5b	++	++		++	+
CG12154	FBgn0004102	ocelliless	oc		5b	++	++		no	no
CG14441	FBgn0029895	-	CG14441		5b	++	no	round	no	no
CG3340	FBgn0001325	Kruppel	Kr	PHD	5b	++	++	blistered, crumbled	no	no
CG7672	FBgn0004618	glass	gl	zf-BED	5b	++	++	vein loss	no	no
CG10052	FBgn0020617	Retinal Homeobox	Rx	Homeobox	5b	++	+
CG11607	FBgn0001170	Homeodomain protein 2.0	H2.0	Homeobox	5b	++	++	crumbled
CG1759	FBgn0000251	caudal	cad	Homeobox	5b	++	+	extraveins
CG2914	FBgn0005660	Ets at 21C	Ets21C		5b	++	++	blistered
CG3388	FBgn0001148	gooseberry	gsb	PAX	5b	++	+
CG5403	FBgn0004795	retained	retn	DnaJ	5b	++	+
CG5488	FBgn0004854	BarH2	B-H2	Homeobox	5b	++	++
CG6269	FBgn0024184	unc-4	unc-4	Homeobox	5b	+++	++	extra veins, small, crumbled	+	no
CG12690	FBgn0029504	Checkpoint suppressor homologue	CHES-1-like		5b	+++	+++		no	no
CG43286	FBgn0262975	cap-n-collar	cnc	bZIP_1	5b	+++	++		no	no
CG13475	FBgn0040318	HGTX	HGTX	Homeobox	5b	+++	++
CG1650	FBgn0015561	unplugged	unpg	Homeobox	5b	+++	++
CG32474	FBgn0039411	dysfusion	dys		5b	+++	+++
CG6352	FBgn0026058	Ods-site homeobox	OdsH	Homeobox	5b	+++	++
CG7771	FBgn0004666	single-minded	sim	HLH	5b	+++	++
CG8524	FBgn0024321	NK7.1	NK7.1		5b	+++	++
CG42741	FBgn0261705	-	CG42741	#N/A	5b	+++	++
CG3858	FBgn0019809	gcm2	gcm2	GCM	5b	+++	++
CG18144	FBgn0032209	Hand	Hand		5b	+++	++
CG5069	FBgn0014143	crocodile	croc	Fork_head	5b	+++	++/+	dorsal bend, patterning defetcs	no	no
CG6716	FBgn0003145	paired	prd	PAX	5b	+++	++		no	no
CG9650	FBgn0029939	-	CG9650		5b	+++/lethal	+++		no	no
CG2692	FBgn0001147	gooseberry-neuro	gsb-n	PAX	5b	+++/lethal	++	round
CG7807	FBgn0261953	Transcription factor AP-2	TfAP-2	TF_AP-2	5b	+++/lethal	++	blistered
CG11121	FBgn0003460	sine oculis	so		5b	lethal	+++/lethal		+	no
CG12245	FBgn0014179	glial cells missing	gcm	GCM	5b	lethal	+++		+	+
CG1464	FBgn0005558	eyeless	ey	Homeobox	5b	lethal	++		+	no
CG11049	FBgn0005561	shaven	sv		5b	lethal	++	round	++	++
CG5893	FBgn0000411	Dichaete	D	HMG_box	5b	lethal	++	round	lethal	+
CG1343	FBgn0020378	Sp1	Sp1	zf-C2H2	5b	lethal	++		no	no
CG5529	FBgn0011758	BarH1	B-H1	Homeobox	5b	lethal	+++		no	no
CG10036	FBgn0015524	orthopedia	otp	Homeobox	5b	lethal	+++/lethal
CG12653	FBgn0000233	buttonhead	btd	zf-C2H2	5b	lethal	++	crumbled, blistered
CG15552	FBgn0024288	Sox100B	Sox100B	HMG_box	5b	lethal	+++
CG42702	FBgn0261613	O/E-associated zinc finger protein	Oaz		5b	lethal	+++
CG18024	FBgn0029123	SoxNeuro	SoxN	HMG_box	5b	lethal	+++
CG2189	FBgn0000439	Deformed	Dfd		5b	lethal	++
CG2851	FBgn0010323	Goosecoid	Gsc	Homeobox	5b	lethal	+++
CG2939	FBgn0004567	sloppy paired 2	slp2	Fork_head	5b	lethal	++
CG32139	FBgn0042630	Sox21b	Sox21b	HMG_box	5b	lethal	lethal
CG7383	FBgn0000560	eagle	eg	zf-C4	5b	lethal	lethal	one escaper +++
CG7508	FBgn0010433	atonal	ato	HLH	5b	lethal	+++
CG7895	FBgn0004110	tinman	tin	Homeobox	5b	lethal	+++/lethal
CG7937	FBgn0004863	C15	C15	Homeobox	5b	lethal	++
CG7260	FBgn0011723	brachyenteron	byn		5b	lethal	lethal
CG11153	FBgn0039938	Sox102F	Sox102F		5b	lethal	lethal
CG8246	FBgn0003130	Pox neuro	Poxn	PAX	5b	no	no		no	no
CG11387	FBgn0004198	cut	ct		5b	no	no
CG15269	FBgn0028878	-	CG15269		5b	no	no
CG31612	FBgn0051612	-	CG31612	zf-C2H2	5b	no	no
CG16738	FBgn0003430	sloppy paired 1	slp1	Fork_head	5b	no	no
CG1072	FBgn0013751	Arrowhead	Awh	LIM	5b	no	no
CG10296	FBgn0037436	Hormone receptor 83	Hr83	zf-C4	6	+	no	dorsal bend	no	no
CG15336	FBgn0030009	-	CG15336	zf-C2H2	6	+	no	vein defects	no	no
CG15710	FBgn0034120	-	CG15710	zf-C2H2	6	+	no	extra veins	no	no
CG17743	FBgn0002521	pleiohomeotic	pho	zf-C2H2	6	+	no	weak	no	no
CG31642	FBgn0051642	-	CG31642		6	+	no	A/P small, extra veins	no	no
CG34403	FBgn0085432	pangolin	pan	HMG_box	6	+	no	weak	no	no
CG17287	FBgn0034202	-	CG17287	zf-DHHC	6	+	+
CG2655	FBgn0011276	Helix loop helix protein 3B	HLH3B	HLH	6	+	no	vein defects
CG5264	FBgn0014949	buttonless	btn	Homeobox	6	+	no
CG5927	FBgn0030899	HES-related	Her	HLH	6	+	no	blistered
CG11093	FBgn0039932	fussel	fuss	Ski_Sno	6	+	+	veinloss
CG13424	FBgn0034520	lateral muscles scarcer	lms		6	+	+	dorsal
CG5441	FBgn0263118	taxi	tx	HLH	6	+	+	A/P smal, extra veins
CG15696	FBgn0038833	-	CG15696	Homeobox	6	++	+		+	+	round
CG8821	FBgn0033748	vismay	vis		6	++	+	vein defects (cross veins missing)	+	no	dorsal bend
CG10034	FBgn0000964	traffic jam	tj	bZIP_Maf	6	++	no	extra veins	++	+	round
CG13287	FBgn0035643	-	CG13287	zf-C2H2	6	++	+	extra veins, blistered	++	no	round
CG3850	FBgn0033782	sugarbabe	sug	zf-C2H2	6	++	+	extra veins	++	+	small, round
CG11152	FBgn0039937	forkhead domain 102C	fd102C	Fork_head	6	++	+	dorsal bend	no	no
CG1132	FBgn0004895	forkhead domain 64A	fd64A	Fork_head	6	++	+	dorsal bend, some veins missing	no	no
CG11551	FBgn0025776	intermediate neuroblasts defective	ind	Homeobox	6	++	++	vein defects, blistered	no	no
CG17197	FBgn0039367	-	CG17197	zf-DHHC	6	++	++		no	no
CG33695	FBgn0052831	-	CG33695		6	++	+	dorsal bend	no	no
CG7952	FBgn0001150	giant	gt	bZIP_2	6	++	+	vein loss	no	no
CG9876	FBgn0034821	-	CG9876	Homeobox	6	++	+	vein loss	no	no
CG9097	FBgn0004870	bric a brac 1	bab1		6	++	+	extra veins	no	no
CG43067	FBgn0262477	Forkhead box P	FoxP	Fork_head	6	++	no	vein loss
CG3836	FBgn0003459	stonewall	stwl		6	++	+	dorsal bend
CG3839	FBgn0002561	lethal of scute	l(1)sc	HLH	6	++	++	blistered
CG3871	FBgn0027364	Six4	Six4	Homeobox	6	++	+++
CG3956	FBgn0003448	snail	sna	zf-C2H2	6	++	no
CG7659	FBgn0015550	target of Poxn	tap	HLH	6	++	+
CG34340	FBgn0085369	-	CG34340	Homeobox	6	++	+	veinloss
CG3526	FBgn0040355	-	CG3526	ZZ	6	++	+	veinloss (males), extra veins (female)
CG10250	FBgn0002922	nautilus	nau	Basic	6	++	++
CG2102	FBgn0004878	castor	cas	zf-C2H2	6	+++	++		lethal	++	crumbled, dorsal bend
CG11294	FBgn0030058	-	CG11294	Homeobox	6	+++	++/+++	dorsal bend, some veins missing	no	no
CG1378	FBgn0003720	tailless	tll	zf-C4	6	+++	+++		no	no
CG17228	FBgn0004595	prospero	pros		6	+++	++		no	+	A/P larger
CG18599	FBgn0038592	-	CG18599	Homeobox	6	+++	++		no	no
CG2682	FBgn0033015	d4	d4	PHD	6	+++	+++		no	no
CG32105	FBgn0052105	-	CG32105	LIM	6	+++	++	extrem notches along A/P	no	no
CG34376	FBgn0085405	-	CG34376	BTB	6	+++	+++		no	no
CG5005	FBgn0022740	HLH54F	HLH54F	HLH	6	+++	+++		no	no
CG7046	FBgn0038979	-	CG7046	HMG_box	6	+++	+++		no	no
CG9786	FBgn0001180	hunchback	hb	zf-C2H2	6	+++	+++		no	no
CG10446	FBgn0032741	similar to Deadpan	Side	HLH	6	+++	++/+++
CG11182	FBgn0025334	Putative homeodomain protein	PHDP	Homeobox	6	+++	++
CG13906	FBgn0028999	nervous fingers 1	nerfin-1	zf-C2H2	6	+++	+++
CG30431	FBgn0050431	-	CG30431	zf-AD	6	+++	+++/++
CG3052	FBgn0011277	Helix loop helix protein 4C	HLH4C	HLH	6	+++	++
CG33323	FBgn0037475	48 related 1	Fer1	HLH	6	+++	++
CG3668	FBgn0004896	forkhead domain 59A	fd59A	Fork_head	6	+++	+++
CG1447	FBgn0020912	Ptx1	Ptx1	Homeobox	6	+++	++
CG34367	FBgn0085396	-	CG34367		6	+++	++
CG5737	FBgn0038851	doublesex-Mab related 93B	dmrt93B	DM	6	+++	+++
CG7960	FBgn0013755	Brother	Bro	CBF_beta	6	+++	++	crumbled, blistered
CG42234	FBgn0261723	Dbx	Dbx		6	+++	++
CG34340	FBgn0085369	-	CG34340	Homeobox	6	+++	++	vein loss
CG33557	FBgn0053557	-	CG33557	HLH	6	+++	++	crumbled, blistered	++	++
CG10604	FBgn0000529	brain-specific homeobox	bsh	Homeobox	6	+++/lethal	+++
CG11617	FBgn0031232	-	CG11617	Homeobox	6	+++/lethal	+++
CG7760	FBgn0024249	cousin of atonal	cato	HLH	6	+++/lethal	+++
CG9768	FBgn0261434	huckebein	hkb	zf-C2H2	6	+++/lethal	++/+++
CG5545	FBgn0032651	Olig family	Oli	HLH	6	+++/lethal	++
CG10699	FBgn0002023	Lim3	Lim3	LIM	6	+++/lethal	++	strong notches, almost complete vein loss	++	+	round
CG2052	FBgn0262636	-	Lin29		6	+++/lethal	+++		no	no
CG4575	FBgn0029920	-	CR4575		6	+++/lethal	++
CG7045	FBgn0038978	-	CG7045	HMG_box	6	+++/lethal	++
CG7056	FBgn0038852	HHEX ortholog (H. sapiens)	HHEX		6	+++/lethal	+++
CG9571	FBgn0031086	forkhead domain 19B	fd19B	Fork_head	6	+++/lethal	++	crumbled
CG12809	FBgn0041105	nervous fingers 2	nerfin-2		6	+++/lethal	+++/++
CG1130	FBgn0004880	scratch	scrt		6	+++/lethal	+++
CG10325	FBgn0000014	abdominal A	abd-A	Homeobox	6	lethal	+++		+	+	A/P small
CG11194	FBgn0027788	Hairy/E(spl)-related with YRPW motif	Hey	HLH	6	lethal	lethal		+	+	round
CG4318	FBgn0030455	-	CG4318	zf-AD	6	lethal	+++		+	no	round
CG16779	FBgn0037698	-	CG16779		6	lethal	lethal		++	+	round
CG4676	FBgn0033815	-	CG4676	zf-DHHC	6	lethal	++	crumbled	++	no	round
CG7786	FBgn0034096	-	CG7786	bZIP_1	6	lethal	lethal		lethal	lethal
CG1034	FBgn0000166	bicoid	bcd	Homeobox	6	lethal	++		no	no
CG11186	FBgn0019650	twin of eyeless	toy	PAX	6	lethal	lethal		no	no
CG12605	FBgn0035481	-	CG12605	zf-C2H2	6	lethal	+++		no	no
CG4354	FBgn0005638	slow border cells	slbo	bZIP_2	6	lethal	+++		no	no
CG6794	FBgn0011274	Dorsal-related immunity factor	Dif		6	lethal	lethal		no	no
CG8567	FBgn0013799	Deformed epidermal autoregulatory factor-1	Deaf1	SAND	6	lethal	lethal		no	no
CG9310	FBgn0004914	Hepatocyte nuclear factor 4	Hnf4	zf-C4	6	lethal	+++/lethal		no	no
CG9151	FBgn0000028	abnormal chemosensory jump 6	acj6	#N/A	6	lethal	lethal		no	no
CG10393	FBgn0003270	absent MD neurons and olfactory sensilla	amos	HLH	6	lethal	lethal
CG11202	FBgn0021767	optomotor-blind-related-gene-1	org-1	T-box	6	lethal	+++
CG12767	FBgn0040465	Dorsal interacting protein 3	Dip3		6	lethal	+++
CG12952	FBgn0037672	salivary gland-expressed bHLH	sage	HLH	6	lethal	++
CG18647	FBgn0045759	biniou	bin	Fork_head	6	lethal	lethal
CG2819	FBgn0023489	PvuII-PstI homology 13	Pph13	Homeobox	6	lethal	lethal
CG32121	FBgn0052121	-	CG32121	BTB	6	lethal	lethal
CG32904	FBgn0028991	sequoia	seq	zf-C2H2	6	lethal	+++
CG4677	FBgn0039039	lame duck	lmd	zf-C2H2	6	lethal	++	blistered
CG5952	FBgn0038402	48 related 2	Fer2	HLH	6	lethal	++	crumbled
CG6312	FBgn0020379	Rfx	Rfx		6	lethal	+++
CG6534	FBgn0002941	slouch	slou	Homeobox	6	lethal	++
CG7345	FBgn0036411	Sox21a	Sox21a	HMG_box	6	lethal	lethal
CG8667	FBgn0023091	dimmed	dimm	HLH	6	lethal	+++
CG18265	FBgn0036725	-	CG18265	zf-C2H2	6	lethal	++	crumbled
CG8567	FBgn0013799	Deformed epidermal autoregulatory factor-1	Deaf1	SAND	6	lethal	+++
CG31670	FBgn0031375	earmuff	erm	zf-C2H2	6	lethal	++	vein loss, blistered
CG10654	FBgn0036294	-	CG10654	zf-AD	6	no	no		+	no
CG1641	FBgn0003411	sisterless A	sisA		6	no	no		no	no
CG4328	FBgn0036274	-	CG4328	LIM	6	no	no		no	no
CG11317	FBgn0039816	-	CG11317	zf-C2H2	6	no	no
CG11762	FBgn0037618	-	CG11762	zf-AD	6	no	no
CG12071	FBgn0039808	-	CG12071	zf-C2H2	6	no	no
CG13617	FBgn0039201	-	CG13617		6	no	no
CG14655	FBgn0037275	-	CG14655	zf-C2H2	6	no	no
CG42267	FBgn0259162	-	RunxB	Runt	6	no	no
CG15715	FBgn0036538	-	CG15715		6	no	no
CG17195	FBgn0039369	-	CG17195	zf-DHHC	6	no	no
CG17801	FBgn0038550	-	CG17801	zf-C3HC4	6	no	no
CG17803	FBgn0038547	-	CG17803	zf-AD	6	no	no
CG18362	FBgn0032940	Mlx interactor	Mio	HLH	6	no	no
CG2678	FBgn0014931	-	CG2678	zf-AD	6	no	no
CG3136	FBgn0033010	Atf6	Atf6	bZIP_1	6	no	no
CG31835	FBgn0051835	-	CG31835	ZZ	6	no	no
CG31875	FBgn0051875	-	CG31875	ELM2	6	no	no
CG3258	FBgn0000137	asense	ase	HLH	6	no	no
CG32788	FBgn0021738	Circadianly Regulated Gene	Crg-1		6	no	no
CG33152	FBgn0008636	homeobrain	hbn	Homeobox	6	no	no
CR33221	FBgn0053221	-	CR33221	zf-C4	6	no	no
CG4216	FBgn0003683	terminus	term	zf-C2H2	6	no	no
CG42332	FBgn0259234	Calmodulin-binding transcription activator	Camta		6	no	no
CG4956	FBgn0039370	-	CG4956	zf-DHHC	6	no	no
CG5204	FBgn0032473	-	CG5204	ZZ	6	no	no
CG5586	FBgn0039530	Tusp	Tusp		6	no	no
CG6892	FBgn0039225	Ets96B	Ets96B	Ets	6	no	no
CG7271	FBgn0036791	-	CG7271	zf-C2H2	6	no	no
CG7691	FBgn0038626	-	CG7691	zf-C2H2	6	no	no
CG8119	FBgn0030664	-	CG8119		6	no	no
CG8216	FBgn0033358	-	CG8216		6	no	no
CG8643	FBgn0033310	regular	rgr		6	no	no
CG2120	FBgn0030005	-	CG2120	zf-C2H2	6	no	no
CG32006	FBgn0052006	-	CG32006	Fork_head	6	no	no
CG16801	FBgn0034012	Hormone receptor 51	Hr51		6	no	no
CG8484	FBgn0037751	matotopetli	topi	zf-C2H2	6	no	no
CG3491	FBgn0028887	-	CG3491		6	no	no
CG42739	FBgn0261703	germ cell-expressed bHLH-PAS	gce		6	no	no
CG8301	FBgn0037717	-	CG8301	zf-AD	6	no	no
CG2380	FBgn0042696	Nuclear factor I	NfI	MH1	6	no	no
CG17172	FBgn0039946	(A+T)-stretch binding protein	ATbp	zf-C2H2	NA	+	no	additional cross vein
CG17594	FBgn0028993	scarecrow	scro		NA	++	++
CG3905	FBgn0265623	Suppressor of zeste 2	Su(z)2		NA	++	+	dorsal bend, blistered
CG9342	FBgn0266369	H6-like-homeobox	Hmx		NA	++	no
CG6930	FBgn0265276	Microsomal triacylglycerol transfer protein	Mtp	zf-C2H2	NA	+++	++	pattern defect	++	+	round
CG43860	FBgn0264442	lethal (3) neo38	l(3)neo38		NA	lethal	++		+++	++	crumbled
CG11987	FBgn0264075	abrupt	ab	HLH	NA	lethal	++		no	no
CG44123	FBgn0264954	tango	tgo	Fork_head	NA	lethal	+++		no	no
CG18389	FBgn0264490	forkhead domain 3F	fd3F	HTH_psq	NA	lethal	lethal
CG45074	FBgn0266445	Ecdysone-induced protein 93F	Eip93F	zf-C2H2	NA	lethal	+++/lethal
CG6103	FBgn0265784	Kruppel homolog 1	Kr-h1	pKID	NA	lethal	lethal
CG45070	FBgn0266441	Cyclic-AMP response element binding protein B	CrebB		NA	lethal	++
CG43748	FBgn0264005	CTP synthase	CTPsyn		NA	lethal	++	vein loss, extra bristles
CG44246	FBgn0265182	Activating transcription factor-2	Atf-2	bZIP_2	NA	no	no
CG45050	FBgn0263750	-	CG45050	zf-A2	NA	no	no
CG45477	FBgn0264981	maternal gene required for meiosis	mamo		NA	no	no
											round, A/P large
											larger ventral bend
											round
											extra veins
											round
											extra veins

## Sheet: 2. RNAi only
					RNAi	RNAi
RNAi only list	FBID KEY	name	symbol	chromatin cluster	MS1096-Gal4 males	MS1096-Gal4 females	description
CG8319	FBgn0037722	-	CG8319	1	+	no	dorsal bend
CG10037	FBgn0086680	ventral veins lacking	ventral veins lacking	1	no	no
CG7404	FBgn0035849	estrogen-related receptor	Err	2	++	+	larger A/P ventral bend
CG7803	FBgn0004050	zeste	z	2	++	+	round
CG15845	FBgn0000054	Adh transcription factor 1	Adf1	3	+	+	A/P small (weak)
CG5683	FBgn0005694	Adult enhancer factor 1	Aef1	3	no	no
CG5583	FBgn0005659	Ets at 98B	Ets98B	4	+	+	round
CG11491	FBgn0000210	broad	br	4	lethal	lethal
CG4257	FBgn0016917	Signal-transducer and activator of transcription protein at 92E	Stat92E	4	no	no
CG1449	FBgn0004607	Zn finger homeodomain 2	zfh2	4b	+	+	dorsal bend
CG1897	FBgn0000492	Drop	Dr	4b	+	+	round
CG6464	FBgn0261648	spalt major	salm	4b	+	+	extra veins, posterior dorsal
CG14307	FBgn0004652	fruitless	fruitless	4b	+	no	ventral bend (weak)
CG43122	FBgn0262582	capicua	cic	4b	++	+	round
CG7450	FBgn0004396	Cyclic-AMP response element binding protein A	CrebA	4b	++	+	round
CG6376	FBgn0011766	E2F transcription factor 1	E2F transcription factor	4b	++	++	A/P small
CG3578	FBgn0000179	bifid	omb	4b	+++	++
CG4881	FBgn0000287	spalt-related	salr	4b	lethal	++	crumbled, drosal bend
CG7734	FBgn0003396	schnurri	shn	4b	no	no
CG10002	FBgn0000659	fork head	Fkh	5b	+	+	small, round
CG32120	FBgn0002573	senseless	sens	5b	++	+	dorsal bend, A/P small
CG42741	FBgn0261705	-	CG42741	5b	no	no
CG6570	FBgn0008651	ladybird late	lbl	5b	no	no
CG11354	FBgn0026411	-	Lim1	5b	no	no
CG7368	FBgn0036179	-	CG7368	6	+	no	A/P small (weak)
CG7391	FBgn0023076	Clock	clk	6	++		crumbled
CG6172	FBgn0261930	ventral nervous system defective	vnd	6	no	no
CG1922	FBgn0028996	onecut	onecut	6	no	no
CG16902	FBgn0264562	Hr4	Hr4	NA	++	+	dorsal bend

## Sheet: 3. uncharacterized candidates
					overexpression	overexpression		RNAi	RNAi
CG#	FBID KEY	symbol	DNA binding domain	chromatin cluster	MS1096-Gal4 males	MS1096-Gal4 females	remarks	MS1096-Gal4 males	MS1096-Gal4 females	remarks
CG12219	FBgn0043796	CG12219	zf-AD	3	+	no	round	+	+	round
CG15514	FBgn0039712	CG15514	zf-BED	1	+	no	dorsal bend	+	no	dorsal bend
CG12659	FBgn0040929	CG12659	YL1_C	2	+	no	weak	++	no	fail to unfold
CG30020	FBgn0050020	CG30020	zf-AD	3	+	no	blistered, vein defects	++	++	crumbled
CG15696	FBgn0038833	CG15696	Homeobox	6	++	+		+	+	round
CG10209	FBgn0033971	CG10209		2	++	+	females larger, males small	++	+	large
CG13287	FBgn0035643	CG13287	zf-C2H2	6	++	+	extra veins, blistered	++	no	round
CG10321	FBgn0034643	CG10321	zf-AD	3	+++	+++		+	no	round
CG10949	FBgn0032858	CG10949	AT_hook	2	+++	++/+++	dorsal bend	+	+	round
CG33557	FBgn0053557	CG33557	HLH	6	+++	++	crumbled, blistered	++	++
CG1024	FBgn0027514	CG1024	zf-C2H2	2	+++	++		+++	++	crumbled
CG8765	FBgn0036900	CG8765	Myb_DNA-binding	3	+++	++		lethal	lethal
CG8478	FBgn0037746	CG8478	zf-C2H2	1	+++/lethal	+++/lethal		+	+	round
CG7357	FBgn0038551	CG7357	zf-AD	2	+++/lethal	+++		++	lethal?	round
CG1233	FBgn0035137	CG1233	zf-C2H2	3	lethal	++		+	+
CG31388	FBgn0051388	CG31388	zf-AD	3	lethal	++	crumbled	+	+	round
CG4318	FBgn0030455	CG4318	zf-AD	6	lethal	+++		+	no	round
CG9215	FBgn0030659	CG9215	zf-AD	2	lethal	lethal		+	+	larger, ventral bend
CG9776	FBgn0027866	CG9776		3	lethal	+++		+	no	round
CG16779	FBgn0037698	CG16779		6	lethal	lethal		++	+	round
CG18764	FBgn0042205	CG18764	zf-AD	2	lethal	+++/++		++	+	round
CG4676	FBgn0033815	CG4676	zf-DHHC	6	lethal	++	crumbled	++	no	round
CG7101	FBgn0030963	CG7101	zf-C2H2	4	lethal	+++/lethal		++	+	round, crumbled
CG3847	FBgn0029867	CG3847	zf-C2H2	2	lethal	++	extra veins	lethal	+++
CG7786	FBgn0034096	CG7786	bZIP_1	6	lethal	lethal		lethal	lethal
CG10565	FBgn0037051	CG10565	DnaJ	2	no	no		+	+
CG10654	FBgn0036294	CG10654	zf-AD	6	no	no		+	no
CG10431	FBgn0032730	CG10431	THAP	3	no	no		+++	no	do not unfold
CG11398	FBgn0040366	CG11398	zf-C2H2	2	no	no		lethal/+++	++	dorsal bend
										round, A/P large
										larger ventral bend
										round
										extra veins
										round
										extra veins

## Sheet: 4. lethals at 18C
				misexpression at 18C	misexpression at 18C
CG#	FBID KEY	gene		MS1096-Gal4 males	MS1096-Gal4 females
CG4717	FBgn0001320	knirps	kni	lethal	lethal
CG4677	FBgn0039039	lame duck	lmd	lethal	++	blistered
CG2988	FBgn0000576	empty spiracles	ems	lethal/+++	++	blistered
CG7807	FBgn0261953	Transcription factor AP-2	TfAP-2	lethal/+++	++	blistered
CG8376	FBgn0000099	apterous	ap	lethal	++	crumbled
CG31388	FBgn0051388	-	CG31388	lethal	++	crumbled
CG4676	FBgn0033815	-	CG4676	lethal	++	crumbled
CG5952	FBgn0038402	48 related 2	Fer2	lethal	++	crumbled
CG11799	FBgn0036134	forkhead domain 68A	fd68A	lethal/+++	++	crumbled
CG9571	FBgn0031086	forkhead domain 19B	fd19B	lethal/+++	++	crumbled
CG7960	FBgn0013755	Brother	Bro	+++	++	crumbled, blistered
CG33557	FBgn0053557	-	CG33557	+++/++	++	crumbled, blistered
CG12653	FBgn0000233	buttonhead	btd	lethal	++	crumbled, blistered
CG9745	FBgn0000412	D1 chromosomal protein	D1	lethal	+++	dorsal
CG5093	FBgn0035954	Dorsocross3	Doc3	+++	++/+++	dorsal bend
CG10344	FBgn0034729	-	CG10344	+++	+	dorsal bend
CG10949	FBgn0032858	-	CG10949	+++	++/+++	dorsal bend
CG34395	FBgn0085424	nubbin	nub	lethal	++	dorsal bend
CG34422	FBgn0085451	-	CG34422	lethal/++	++	dorsal bend
CG10197	FBgn0001319	knot	kn	lethal/+++	+	dorsal bend
CG10619	FBgn0003896	tailup	tup	+++	++	huge notches in female, wings almost absent in males
CG7383	FBgn0000560	eagle	eg	lethal	lethal	one escaper +++
CG11049	FBgn0005561	shaven	sv	lethal	++	round
CG5893	FBgn0000411	Dichaete	D	lethal	++	round
CG2692	FBgn0001147	gooseberry-neuro	gsb-n	lethal/+++	++	round
CG9653	FBgn0024250	brinker	brk	+++	+++
CG10571	FBgn0015904	araucan	ara	+++	+++
CG5838	FBgn0015664	DNA replication-related element factor	Dref	+++	+++
CG3935	FBgn0000061	aristaless	al	+++	++/+++
CG12690	FBgn0029504	Checkpoint suppressor homologue	CHES-1-like	+++	+++
CG9786	FBgn0001180	hunchback	hb	+++	+++
CG5005	FBgn0022740	HLH54F	HLH54F	+++	+++
CG1378	FBgn0003720	tailless	tll	+++	+++
CG3827	FBgn0004170	scute	sc	+++	+++
CG2682	FBgn0033015	d4	d4	+++	+++
CG10321	FBgn0034643	-	CG10321	+++	+++
CG10446	FBgn0032741	similar to Deadpan	Side	+++	++/+++
CG11182	FBgn0025334	Putative homeodomain protein	PHDP	+++	++
CG12296	FBgn0013469	klumpfuss	klu	+++	++
CG13475	FBgn0040318	HGTX	HGTX	+++	++
CG13906	FBgn0028999	nervous fingers 1	nerfin-1	+++	+++
CG1650	FBgn0015561	unplugged	unpg	+++	++
CG17888	FBgn0016694	PAR-domain protein 1	Pdp1	+++	++
CG18599	FBgn0038592	-	CG18599	+++	++
CG30011	FBgn0050011	gemini	gem	+++	+++
CG30431	FBgn0050431	-	CG30431	+++	+++/++
CG3052	FBgn0011277	Helix loop helix protein 4C	HLH4C	+++	++
CG3090	FBgn0005612	Sox box protein 14	Sox14	+++	+++/++
CG32474	FBgn0039411	dysfusion	dys	+++	+++
CG33323	FBgn0037475	48 related 1	Fer1	+++	++
CG34376	FBgn0085405	-	CG34376	+++	+++
CG3668	FBgn0004896	forkhead domain 59A	fd59A	+++	+++
CG3886	FBgn0005624	Posterior sex combs	Psc	+++	+++
CG5034	FBgn0032223	GATAd	GATAd	+++	++
CG5369	FBgn0085396	-	CG34367	+++	++
CG5669	FBgn0039169	Sp1-like factor for pairing sensitive-silencing	Spps	+++	+++
CG5737	FBgn0038851	doublesex-Mab related 93B	dmrt93B	+++	+++
CG6061	FBgn0033846	Myb-interacting protein 120	mip120	+++	+++
CG6143	FBgn0004401	Protein on ecdysone puffs	Pep	+++	+++
CG6352	FBgn0026058	Ods-site homeobox	OdsH	+++	++
CG7046	FBgn0038979	-	CG7046	+++	+++
CG7583	FBgn0020496	C-terminal Binding Protein	CtBP	+++	++
CG7752	FBgn0259785	putzig	pzg	+++	+++
CG7771	FBgn0004666	single-minded	sim	+++	++
CG7938	FBgn0003511	Serendipity beta	Sry-beta	+++	++
CG7959	FBgn0013753	Big brother	Bgb	+++	++
CG8092	FBgn0033998	relative of woc	row	+++	+++
CG8524	FBgn0024321	NK7.1	NK7.1	+++	++
CG8765	FBgn0036900	-	CG8765	+++	++
CG9495	FBgn0003334	Sex comb on midleg	Scm	+++	+++
CG9696	FBgn0020306	domino	dom	+++	++
CG6716	FBgn0003145	paired	prd	+++/++	++
CG12391	FBgn0033581	-	CG12391	+++/++	++
CG4360	FBgn0038787	-	CG4360	+++/lethal	+++
CG10604	FBgn0000529	brain-specific homeobox	bsh	+++/lethal	+++
CG11617	FBgn0031232	-	CG11617	+++/lethal	+++
CG7760	FBgn0024249	cousin of atonal	cato	+++/lethal	+++
CG9768	FBgn0261434	huckebein	hkb	+++/lethal	++/+++
CG10325	FBgn0000014	abdominal A	abd-A	lethal	+++
CG3445	FBgn0035997	pleiohomeotic like	phol	lethal	+++
CG3758	FBgn0001981	escargot	esg	lethal	lethal/+++
CG9015	FBgn0000577	engrailed	en	lethal	lethal
CG9930	FBgn0008646	E5	E5	lethal	lethal
CG11121	FBgn0003460	sine oculis	so	lethal	lethal/+++
CG1233	FBgn0035137	-	CG1233	lethal	++
CG1464	FBgn0005558	eyeless	ey	lethal	++
CG11194	FBgn0027788	Hairy/E(spl)-related with YRPW motif	Hey	lethal	lethal
CG12245	FBgn0014179	glial cells missing	gcm	lethal	+++
CG33183	FBgn0000448	Hormone receptor-like in 46	Hr46	lethal	lethal
CG8544	FBgn0003345	scalloped	sd	lethal	+++
CG18023	FBgn0004865	Ecdysone-induced protein 78C	Eip78C	lethal	lethal
CG10605	FBgn0015919	caupolican	caup	lethal	+++
CG11172	FBgn0030505	NFAT homolog	NFAT	lethal	lethal
CG12287	FBgn0004394	POU domain protein 2	pdm2	lethal	lethal/++
CG33336	FBgn0039044	p53	p53	lethal	+++
CG4354	FBgn0005638	slow border cells	slbo	lethal	+++
CG6667	FBgn0260632	dorsal	dl	lethal	lethal
CG6794	FBgn0011274	Dorsal-related immunity factor	Dif	lethal	lethal
CG7928	FBgn0039740	-	CG7928	lethal	+++
CG8567	FBgn0013799	Deformed epidermal autoregulatory factor-1	Deaf1	lethal	lethal
CG1034	FBgn0000166	bicoid	bcd	lethal	++
CG11987	FBgn0264075	tango	tgo	lethal	++
CG11186	FBgn0019650	twin of eyeless	toy	lethal	lethal
CG11247	FBgn0037120	-	CG11247	lethal	lethal
CG12630	FBgn0028979	tiptop	tio	lethal	lethal
CG12632	FBgn0264954	forkhead domain 3F	fd3F	lethal	+++
CG1343	FBgn0020378	Sp1	Sp1	lethal	++
CG10021	FBgn0004893	brother of odd with entrails limited	bowl	lethal	+++
CG10036	FBgn0015524	orthopedia	otp	lethal	+++/lethal
CG10393	FBgn0003270	absent MD neurons and olfactory sensilla	amos	lethal	lethal
CG10704	FBgn0036285	twin of eyg	toe	lethal	+++
CG11202	FBgn0021767	optomotor-blind-related-gene-1	org-1	lethal	+++
CG12223	FBgn0011764	Dorsal switch protein 1	Dsp1	lethal	lethal
CG12605	FBgn0035481	-	CG12605	lethal	+++
CG12767	FBgn0040465	Dorsal interacting protein 3	Dip3	lethal	+++
CG12952	FBgn0037672	salivary gland-expressed bHLH	sage	lethal	++
CG13897	FBgn0035160	hinge3	hng3	lethal	lethal
CG1407	FBgn0033474	-	CG1407	lethal	+++
CG1454	FBgn0005642	wings down	wdn	lethal	++
CG14938	FBgn0020309	crooked legs	crol	lethal	lethal
CG33956	FBgn0001297	kayak	kay	lethal	++
CG15552	FBgn0024288	Sox100B	Sox100B	lethal	+++
CG16779	FBgn0037698	-	CG16779	lethal	lethal
CG17077	FBgn0003118	pointed	pnt	lethal	lethal/+++
CG17257	FBgn0031495	beta4GalNAcTB pilot	GABPI	lethal	lethal/+++
CG17390	FBgn0261613	O/E-associated zinc finger protein	Oaz	lethal	+++
CG17836	FBgn0261113	-	Xrp1	lethal	+++
CG17958	FBgn0003512	Serendipity delta	Sry-delta	lethal	++
CG18024	FBgn0029123	SoxNeuro	SoxN	lethal	+++
CG18389	FBgn0264490	Ecdysone-induced protein 93F	Eip93F	lethal	lethal
CG18412	FBgn0004861	polyhomeotic proximal	ph-p	lethal	lethal
CG1856	FBgn0003870	tramtrack	ttk	lethal	+++
CG1864	FBgn0014859	Hormone receptor-like in 38	Hr38	lethal	+++
CG18647	FBgn0045759	biniou	bin	lethal	lethal
CG18764	FBgn0042205	-	CG18764	lethal	+++/++
CG18783	FBgn0266450	Kruppel homolog 1	Kr-h1	lethal	lethal/+++
CG2189	FBgn0000439	Deformed	Dfd	lethal	++
CG2275	FBgn0001291	Jun-related antigen	Jra	lethal	+++
CG2711	FBgn0000520	deformed wings	dwg	lethal	++
CG2819	FBgn0023489	PvuII-PstI homology 13	Pph13	lethal	lethal
CG2851	FBgn0010323	Goosecoid	Gsc	lethal	+++
CG2939	FBgn0004567	sloppy paired 2	slp2	lethal	++
CG2956	FBgn0003900	twist	twi	lethal	+++/++
CG3114	FBgn0005427	erect wing	ewg	lethal	+++
CG31240	FBgn0011701	reversed polarity	repo	lethal	+++
CG31460	FBgn0051460	-	CG31460	lethal	+++
CG31666	FBgn0086758	Chronologically inappropriate morphogenesis	chinmo	lethal	+++
CG32121	FBgn0052121	-	CG32121	lethal	lethal
CG32139	FBgn0042630	Sox21b	Sox21b	lethal	lethal
CG32772	FBgn0052772	-	CG32772	lethal	lethal/+++
CG3629	FBgn0000157	Distal-less	Dll	lethal	lethal/+++
CG3726	FBgn0029824	-	CG3726	lethal	lethal
CG3851	FBgn0002985	odd skipped	odd	lethal	+++
CG4055	FBgn0028991	sequoia	seq	lethal	+++
CG4217	FBgn0038805	mitochondrial transcription factor A	TFAM	lethal	lethal
CG4220	FBgn0004858	elbow B	elB	lethal	++
CG42277	FBgn0267337	rotund	rn	lethal	+++
CG4318	FBgn0030455	-	CG4318	lethal	+++
CG4427	FBgn0043364	cabut	cbt	lethal	lethal
CG4807	FBgn0264442	abrupt	ab	lethal	++
CG5529	FBgn0011758	BarH1	B-H1	lethal	+++
CG6103	FBgn0265784	Cyclic-AMP response element binding protein B	CrebB	lethal	lethal
CG6312	FBgn0020379	Rfx	Rfx	lethal	+++
CG6534	FBgn0002941	slouch	slou	lethal	++
CG6813	FBgn0037923	-	CG6813	lethal	+++
CG6854	FBgn0266452	CTP synthase	CTPsyn	lethal	++
CG7101	FBgn0030963	-	CG7101	lethal	lethal/+++
CG7345	FBgn0036411	Sox21a	Sox21a	lethal	lethal
CG7508	FBgn0010433	atonal	ato	lethal	+++
CG7786	FBgn0034096	-	CG7786	lethal	lethal
CG7895	FBgn0004110	tinman	tin	lethal	lethal/+++
CG7937	FBgn0004863	C15	C15	lethal	++
CG8314	FBgn0034057	-	CG8314	lethal	+++
CG8404	FBgn0005613	Sox box protein 15	Sox15	lethal	+++/++
CG8667	FBgn0023091	dimmed	dimm	lethal	+++
CG9215	FBgn0030659	-	CG9215	lethal	lethal
CG9310	FBgn0004914	Hepatocyte nuclear factor 4	Hnf4	lethal	lethal/+++
CG9776	FBgn0027866	-	CG9776	lethal	+++
CG5545	FBgn0032651	Olig family	Oli	lethal/++	++
CG33261	FBgn0013263	Trithorax-like	Trl	lethal/+++	lethal
CG11494	FBgn0263108	BTB-protein-VII	BtbVII	lethal/+++	++
CG17802	FBgn0038549	-	CG17802	lethal/+++	+++
CG2052	FBgn0262636	-	Lin29	lethal/+++	+++
CG31258	FBgn0266916	-	Cenp-C	lethal/+++	++
CG4575	FBgn0029920	-	CR4575	lethal/+++	++
CG6824	FBgn0003028	ovo	ovo	lethal/+++	lethal/+++
CG6913	FBgn0037937	48 related 3	Fer3	lethal/+++	+++
CG7045	FBgn0038978	-	CG7045	lethal/+++	++
CG7056	FBgn0038852	HHEX ortholog (H. sapiens)	HHEX	lethal/+++	+++
CG7357	FBgn0038551	-	CG7357	lethal/+++	+++
CG8478	FBgn0037746	-	CG8478	lethal/+++	lethal/+++
CG9139	FBgn0262937	Rabaptin-5-associated exchange factor for Rab5 ortholog (H. sapiens)	Rabex-5	lethal/+++	+++
CG9418	FBgn0026582	High mobility group protein 2	Hmg-2	lethal/+++	+++
CG9650	FBgn0029939	-	CG9650	lethal/+++	+++
