# Supplementary material for: A large-scale, in vivo transcription factor screen defines bivalent chromatin as a key property of regulatory factors mediating Drosophila wing development
Source: HighWire-hosted journal article supplement (doi:10.1101/gr.181305.114), 2015-01-07
Supplement: Supp_Table2.xlsx [file Supp_Table2.xlsx]

## Sheet: cluster 4a
Gene	FB ID	CG number
18w	FBgn0004364	CG8896
a	FBgn0000008	CG6741
aay	FBgn0023129	CG3705
ab	FBgn0259750	CG43860
Abl	FBgn0000017	CG4032
Acp32CD	FBgn0023415	CG4605
Acp36DE	FBgn0011559	CG7157
Acp63F	FBgn0015585	CG10852
Acp76A	FBgn0015586	CG3801
Acp95EF	FBgn0002863	CG17924
Actn	FBgn0000667	CG4376
Ada2b	FBgn0037555	CG9638
ade5	FBgn0020513	CG3989
Aldh-III	FBgn0010548	CG11140
Alh	FBgn0261238	CG1070
Ama	FBgn0000071	CG2198
Amun	FBgn0030328	CG2446
arm	FBgn0000117	CG11579
arr	FBgn0000119	CG5912
Art6	FBgn0038189	CG9927
ASPP	FBgn0034606	CG18375
Atf3	FBgn0028550	CG11405
Atg5	FBgn0029943	CG1643
atl	FBgn0039213	CG6668
Atox1	FBgn0052446	CG32446
ATPCL	FBgn0020236	CG8322
att-ORFA	FBgn0067783	CG4241
b	FBgn0036165	CG7533
baz	FBgn0000163	CG5055
BBS8	FBgn0031255	CG13691
bbx	FBgn0024251	CG1414
Bet1	FBgn0260857	CG14084
betaTub60D	FBgn0003888	CG3401
bib	FBgn0000180	CG4722
bif	FBgn0014133	CG1822
bip1	FBgn0026263	CG7574
blot	FBgn0027660	CG3897
blow	FBgn0004133	CG1363
blp	FBgn0038387	CG5268
BM-40-SPARC	FBgn0026562	CG6378
bnb	FBgn0001090	CG7088
boi	FBgn0040388	CG32796
bon	FBgn0023097	CG5206
br	FBgn0000210	CG11491
Bre1	FBgn0086694	CG10542
Brf	FBgn0038499	CG31256
brk	FBgn0024250	CG9653
brm	FBgn0000212	CG5942
btsz	FBgn0053555	CG44012
Bx	FBgn0000242	CG44425
by	FBgn0000244	CG9379
cact	FBgn0000250	CG5848
Cad86C	FBgn0261053	CG42601
Cad99C	FBgn0039709	CG31009
CAHbeta	FBgn0037646	CG11967
caps	FBgn0023095	CG11282
cdi	FBgn0004876	CG6027
Cdk4	FBgn0016131	CG5072
ced-6	FBgn0029092	CG11804
Cep135	FBgn0036480	CG17081
CG10005	FBgn0037972	CG10005
CG10107	FBgn0035713	CG10107
CG10237	FBgn0032783	CG10237
CG10249	FBgn0027596	CG10249
CG10283	FBgn0032681	CG10283
CG10311	FBgn0038420	CG10311
CG10359	FBgn0035452	CG10359
CG10586	FBgn0037036	CG10586
CG10864	FBgn0038621	CG10864
CG10993	FBgn0030524	CG10993
CG11043	FBgn0031831	CG11043
CG11050	FBgn0031836	CG11050
CG11095	FBgn0030528	CG11095
CG11134	FBgn0030518	CG11134
CG11159	FBgn0034539	CG11159
CG11253	FBgn0036338	CG11253
CG11269	FBgn0034700	CG11269
CG11284	FBgn0030056	CG11284
CG11309	FBgn0037070	CG11309
CG11357	FBgn0035558	CG11357
CG11374	FBgn0031214	CG11374
CG1140	FBgn0035298	CG1140
CG11423	FBgn0034251	CG11423
CG1146	FBgn0035346	CG1146
CG11470	FBgn0039671	CG11470
CG11509	FBgn0029584	CG11509
CG11526	FBgn0035437	CG11526
CG11629	FBgn0032965	CG11629
CG11656	FBgn0038109	CG11656
CG11686	FBgn0040551	CG11686
CG11873	FBgn0039633	CG11873
CG11899	FBgn0014427	CG11899
CG11966	FBgn0037645	CG11966
CG12003	FBgn0035234	CG12003
CG12035	FBgn0035263	CG12035
CG12078	FBgn0035426	CG12078
CG12118	FBgn0030101	CG12118
CG12163	FBgn0260462	CG12163
CG12206	FBgn0029662	CG12206
CG12214	FBgn0033495	CG12214
CG12237	FBgn0031048	CG12237
CG12262	FBgn0035811	CG12262
CG12264	FBgn0032393	CG12264
CG12268	FBgn0039131	CG12268
CG12379	FBgn0030676	CG12379
CG12424	FBgn0033987	CG12424
CG12643	FBgn0040942	CG12643
CG12708	FBgn0030666	CG12708
CG12730	FBgn0029771	CG12730
CG12744	FBgn0033459	CG12744
CG12788	FBgn0031041	CG12788
CG12828	FBgn0033145	CG12828
CG12835	FBgn0033142	CG12835
CG12880	FBgn0046258	CG12880
CG12985	FBgn0030881	CG12985
CG1299	FBgn0035501	CG1299
CG13024	FBgn0036665	CG13024
CG13204	FBgn0033627	CG13204
CG13300	FBgn0035699	CG13300
CG13333	FBgn0033855	CG13333
CG13367	FBgn0025634	CG13367
CG13369	FBgn0025640	CG13369
CG13377	FBgn0261446	CG13377
CG13481	FBgn0036421	CG13481
CG13482	FBgn0036419	CG13482
CG13506	FBgn0034723	CG13506
CG13516	FBgn0040658	CG13516
CG13587	FBgn0035031	CG13587
CG13676	FBgn0035844	CG13676
CG13693	FBgn0031235	CG13693
CG13713	FBgn0042199	CG13713
CG13800	FBgn0035338	CG13800
CG13893	FBgn0035146	CG13893
CG13894	FBgn0035157	CG13894
CG13895	FBgn0035158	CG13895
CG13897	FBgn0035160	CG13897
CG13898	FBgn0035161	CG13898
CG13917	FBgn0035237	CG13917
CG13921	FBgn0035267	CG13921
CG14132	FBgn0040817	CG14132
CG14220	FBgn0031036	CG14220
CG14223	FBgn0031053	CG14223
CG14269	FBgn0029658	CG14269
CG14290	FBgn0038662	CG14290
CG14291	FBgn0038660	CG14291
CG14383	FBgn0038102	CG14383
CG14414	FBgn0030571	CG14414
CG14438	FBgn0029899	CG14438
CG14439	FBgn0029898	CG14439
CG14443	FBgn0029880	CG14443
CG14471	FBgn0033049	CG14471
CG14502	FBgn0034321	CG14502
CG14505	FBgn0034327	CG14505
CG14589	FBgn0033063	CG14589
CG14668	FBgn0037320	CG14668
CG14731	FBgn0037964	CG14731
CG14763	FBgn0033243	CG14763
CG14830	FBgn0035755	CG14830
CG14869	FBgn0038341	CG14869
CG14913	FBgn0032331	CG14913
CG14997	FBgn0035515	CG14997
CG15071	FBgn0034377	CG15071
CG15093	FBgn0034390	CG15093
CG15118	FBgn0034418	CG15118
CG15233	FBgn0033076	CG15233
CG15365	FBgn0030077	CG15365
CG15390	FBgn0031419	CG15390
CG15485	FBgn0032442	CG15485
CG15544	FBgn0039804	CG15544
CG15611	FBgn0034194	CG15611
CG15650	FBgn0034565	CG15650
CG15674	FBgn0034642	CG15674
CG15706	FBgn0034093	CG15706
CG15773	FBgn0029795	CG15773
CG15876	FBgn0035569	CG15876
CG15905	FBgn0034462	CG15905
CG15914	FBgn0030700	CG15914
CG1607	FBgn0039844	CG1607
CG1640	FBgn0030478	CG1640
CG1648	FBgn0033446	CG1648
CG1662	FBgn0030481	CG1662
CG1667	FBgn0033453	CG1667
CG16733	FBgn0037665	CG16733
CG16762	FBgn0035343	CG16762
CG16791	FBgn0038881	CG16791
CG16799	FBgn0034538	CG16799
CG16852	FBgn0028942	CG16852
CG16853	FBgn0028941	CG16853
CG16989	FBgn0025621	CG16989
CG17026	FBgn0036550	CG17026
CG17027	FBgn0036553	CG17027
CG17028	FBgn0036552	CG17028
CG17029	FBgn0036551	CG17029
CG17032	FBgn0036547	CG17032
CG17121	FBgn0039043	CG17121
CG17249	FBgn0035249	CG17249
CG17278	FBgn0046763	CG17278
CG1753	FBgn0031148	CG1753
CG17672	FBgn0083978	CG17672
CG17754	FBgn0030114	CG17754
CG17786	FBgn0039167	CG17786
CG17838	FBgn0038826	CG17838
CG17843	FBgn0038919	CG17843
CG17919	FBgn0037433	CG17919
CG18004	FBgn0033566	CG18004
CG1806	FBgn0030360	CG1806
CG18135	FBgn0036837	CG18135
CG1815	FBgn0039863	CG1815
CG18249	FBgn0037553	CG18249
CG18404	FBgn0039761	CG18404
CG18467	FBgn0034218	CG18467
CG18508	FBgn0028746	CG18508
CG18536	FBgn0034322	CG18536
CG18537	FBgn0034323	CG18537
CG18538	FBgn0034324	CG18538
CG18539	FBgn0034325	CG18539
CG18540	FBgn0034326	CG18540
CG18549	FBgn0038053	CG18549
CG18598	FBgn0038589	CG18598
CG18666	FBgn0040967	CG18666
CG1927	FBgn0027547	CG1927
CG1969	FBgn0039690	CG1969
CG1998	FBgn0030485	CG1998
CG2017	FBgn0037391	CG2017
CG2083	FBgn0035376	CG2083
CG2533	FBgn0030319	CG2533
CG2656	FBgn0037478	CG2656
CG2837	FBgn0031646	CG2837
CG2839	FBgn0031273	CG2839
CG2865	FBgn0023526	CG2865
CG2901	FBgn0029679	CG2901
CG2918	FBgn0023529	CG2918
CG2991	FBgn0031474	CG2991
CG30010	FBgn0050010	CG30010
CG30015	FBgn0050015	CG30015
CG30089	FBgn0050089	CG30089
CG3011	FBgn0029823	CG3011
CG30114	FBgn0050114	CG30114
CG30156	FBgn0050156	CG30156
CG30279	FBgn0050279	CG30279
CG30280	FBgn0050280	CG30280
CG30281	FBgn0050281	CG30281
CG30283	FBgn0260477	CG30283
CG30284	FBgn0050284	CG30284
CG30286	FBgn0050286	CG30286
CG30287	FBgn0050287	CG30287
CG30323	FBgn0050323	CG30323
CG30398	FBgn0050398	CG30398
CG30421	FBgn0050421	CG30421
CG30441	FBgn0050441	CG30441
CG30487	FBgn0050487	CG30487
CG30497	FBgn0050497	CG30497
CG3097	FBgn0029804	CG3097
CG31031	FBgn0051031	CG31031
CG31041	FBgn0051041	CG31041
CG31048	FBgn0051048	CG31048
CG31055	FBgn0051055	CG31055
CG31115	FBgn0051115	CG31115
CG31121	FBgn0051121	CG31121
CG3123	FBgn0031465	CG3123
CG31230	FBgn0051230	CG31230
CG31437	FBgn0051437	CG31437
CG31496	FBgn0051496	CG31496
CG31523	FBgn0051523	CG31523
CG31538	FBgn0051538	CG31538
CG31549	FBgn0051549	CG31549
CG31606	FBgn0051606	CG31606
CG31710	FBgn0051710	CG31710
CG31743	FBgn0032618	CG31743
CG31751	FBgn0086909	CG31751
CG31793	FBgn0051793	CG31793
CG31807	FBgn0051807	CG31807
CG31815	FBgn0051815	CG31815
CG31883	FBgn0032122	CG31883
CG31907	FBgn0051907	CG31907
CG32026	FBgn0052026	CG32026
CG32082	FBgn0052082	CG32082
CG32103	FBgn0052103	CG32103
CG32109	FBgn0052109	CG32109
CG32119	FBgn0052119	CG32119
CG32137	FBgn0052137	CG32137
CG32141	FBgn0052141	CG32141
CG32152	FBgn0052152	CG32152
CG32185	FBgn0052185	CG32185
CG32246	FBgn0052246	CG32246
CG32259	FBgn0052259	CG32259
CG32298	FBgn0052298	CG32298
CG32299	FBgn0052299	CG32299
CG32447	FBgn0052447	CG32447
CG32473	FBgn0052473	CG32473
CG32576	FBgn0052576	CG32576
CG32595	FBgn0052595	CG32595
CG32650	FBgn0052650	CG32650
CG32655	FBgn0052655	CG32655
CG32772	FBgn0052772	CG32772
CG32829	FBgn0052829	CG32829
CG32982	FBgn0052982	CG32982
CG33226	FBgn0069056	CG33226
CG33232	FBgn0035347	CG33232
CG33275	FBgn0035802	CG33275
CG33285	FBgn0053285	CG33285
CG33307	FBgn0053307	CG33307
CG33463	FBgn0053463	CG33463
CG33493	FBgn0053493	CG33493
CG33514	FBgn0053514	CG33514
CG33523	FBgn0053523	CG33523
CG33795	FBgn0053795	CG33795
CG34135	FBgn0083971	CG34135
CG34149	FBgn0083985	CG34149
CG34159	FBgn0085188	CG34159
CG34171	FBgn0085200	CG34171
CG34193	FBgn0085222	CG34193
CG34214	FBgn0085243	CG34214
CG34231	FBgn0085260	CG34231
CG34263	FBgn0085292	CG34263
CG34264	FBgn0085293	CG34264
CG34269	FBgn0085298	CG34269
CG34276	FBgn0085305	CG34276
CG34299	FBgn0085328	CG34299
CG34313	FBgn0085342	CG34313
CG34380	FBgn0085409	CG34380
CG34388	FBgn0085417	CG34388
CG34398	FBgn0085427	CG34398
CG3610	FBgn0038266	CG3610
CG3624	FBgn0034724	CG3624
CG3655	FBgn0040397	CG3655
CG3708	FBgn0040345	CG3708
CG3770	FBgn0035085	CG3770
CG3823	FBgn0029863	CG3823
CG3838	FBgn0032130	CG3838
CG3880	FBgn0035057	CG3880
CG3902	FBgn0036824	CG3902
CG4194	FBgn0025627	CG4194
CG4199	FBgn0025628	CG4199
CG4221	FBgn0038385	CG4221
CG42238	FBgn0250867	CG42238
CG42240	FBgn0250869	CG42240
CG42245	FBgn0250911	CG42245
CG42258	FBgn0259143	CG42258
CG42272	FBgn0259167	CG42272
CG42306	FBgn0259202	CG42306
CG42376	FBgn0259722	CG42376
CG42394	FBgn0259740	CG42394
CG42395	FBgn0259741	CG42395
CG42446	FBgn0259917	CG42446
CG42487	FBgn0259990	CG42487
CG42489	FBgn0259992	CG42489
CG42550	FBgn0260723	CG42550
CG42556	FBgn0260758	CG42556
CG42561	FBgn0260763	CG42561
CG42649	FBgn0261501	CG42649
CG42651	FBgn0261503	CG42651
CG42693	FBgn0261583	CG42693
CG42754	FBgn0261812	CG42754
CG42755	FBgn0261813	CG42755
CG42759	FBgn0261817	CG42759
CG42787	FBgn0261858	CG42787
CG42813	FBgn0261995	CG42813
CG42856	FBgn0262103	CG42856
CG43072	FBgn0262482	CG43072
CG43101	FBgn0262547	CG43101
CG43131	FBgn0262605	CG43131
CG43162	FBgn0262718	CG43162
CG43163	FBgn0262719	CG43163
CG43169	FBgn0262788	CG43169
CG43188	FBgn0262817	CG43188
CG43189	FBgn0262818	CG43189
CG43192	FBgn0262821	CG43192
CG43250	FBgn0262895	CG43250
CG43267	FBgn0262948	CG43267
CG43341	FBgn0263046	CG43341
CG43389	FBgn0263246	CG43389
CG43394	FBgn0263256	CG43394
CG4390	FBgn0038771	CG4390
CG4461	FBgn0035982	CG4461
CG4496	FBgn0031894	CG4496
CG4582	FBgn0039344	CG4582
CG4586	FBgn0029924	CG4586
CG4622	FBgn0035021	CG4622
CG4631	FBgn0032590	CG4631
CG4726	FBgn0031307	CG4726
CG4766	FBgn0027546	CG4766
CG4797	FBgn0034909	CG4797
CG4914	FBgn0036436	CG4914
CG5059	FBgn0037007	CG5059
CG5078	FBgn0037005	CG5078
CG5151	FBgn0036576	CG5151
CG5191	FBgn0038803	CG5191
CG5224	FBgn0034354	CG5224
CG5273	FBgn0040382	CG5273
CG5346	FBgn0038981	CG5346
CG5376	FBgn0038977	CG5376
CG5435	FBgn0032431	CG5435
CG5466	FBgn0038815	CG5466
CG5508	FBgn0027579	CG5508
CG5509	FBgn0038054	CG5509
CG5548	FBgn0030605	CG5548
CG5704	FBgn0026570	CG5704
CG5853	FBgn0032167	CG5853
CG5991	FBgn0026576	CG5991
CG6018	FBgn0034736	CG6018
CG6040	FBgn0038679	CG6040
CG6051	FBgn0039492	CG6051
CG6142	FBgn0039415	CG6142
CG6145	FBgn0033853	CG6145
CG6163	FBgn0036155	CG6163
CG6168	FBgn0036154	CG6168
CG6191	FBgn0027581	CG6191
CG6216	FBgn0036139	CG6216
CG6294	FBgn0030640	CG6294
CG6299	FBgn0030641	CG6299
CG6353	FBgn0038893	CG6353
CG6361	FBgn0030925	CG6361
CG6398	FBgn0030870	CG6398
CG6443	FBgn0032290	CG6443
CG6527	FBgn0036085	CG6527
CG6568	FBgn0034210	CG6568
CG6678	FBgn0038917	CG6678
CG6734	FBgn0032395	CG6734
CG6793	FBgn0036242	CG6793
CG6888	FBgn0036490	CG6888
CG6891	FBgn0030955	CG6891
CG6901	FBgn0038414	CG6901
CG6954	FBgn0039000	CG6954
CG6959	FBgn0037956	CG6959
CG6981	FBgn0036945	CG6981
CG7082	FBgn0031401	CG7082
CG7099	FBgn0032517	CG7099
CG7101	FBgn0030963	CG7101
CG7102	FBgn0031961	CG7102
CG7201	FBgn0035865	CG7201
CG7224	FBgn0031971	CG7224
CG7267	FBgn0030079	CG7267
CG7362	FBgn0038258	CG7362
CG7367	FBgn0031976	CG7367
CG7377	FBgn0036176	CG7377
CG7387	FBgn0035852	CG7387
CG7567	FBgn0039670	CG7567
CG7639	FBgn0033989	CG7639
CG7675	FBgn0038610	CG7675
CG7694	FBgn0038627	CG7694
CG7702	FBgn0038638	CG7702
CG7735	FBgn0034446	CG7735
CG7741	FBgn0033615	CG7741
CG7816	FBgn0039714	CG7816
CG7912	FBgn0039736	CG7912
CG8036	FBgn0037607	CG8036
CG8097	FBgn0030660	CG8097
CG8180	FBgn0034021	CG8180
CG8252	FBgn0033344	CG8252
CG8260	FBgn0030684	CG8260
CG8306	FBgn0034142	CG8306
CG8420	FBgn0037664	CG8420
CG8468	FBgn0033913	CG8468
CG8520	FBgn0033734	CG8520
CG8547	FBgn0033919	CG8547
CG8596	FBgn0035767	CG8596
CG8740	FBgn0027585	CG8740
CG8788	FBgn0028955	CG8788
CG8813	FBgn0031476	CG8813
CG9008	FBgn0028540	CG9008
CG9107	FBgn0031764	CG9107
CG9162	FBgn0031778	CG9162
CG9184	FBgn0035208	CG9184
CG9263	FBgn0032530	CG9263
CG9427	FBgn0037721	CG9427
CG9436	FBgn0033101	CG9436
CG9521	FBgn0030588	CG9521
CG9522	FBgn0030587	CG9522
CG9547	FBgn0031824	CG9547
CG9593	FBgn0038365	CG9593
CG9682	FBgn0039760	CG9682
CG9691	FBgn0030160	CG9691
CG9692	FBgn0036654	CG9692
CG9772	FBgn0037236	CG9772
CG9782	FBgn0030763	CG9782
CG9837	FBgn0037635	CG9837
CG9990	FBgn0039594	CG9990
CG9992	FBgn0030744	CG9992
chb	FBgn0021760	CG32435
Chd64	FBgn0035499	CG14996
CheA84a	FBgn0261290	CG33779
cher	FBgn0014141	CG3937
chic	FBgn0000308	CG9553
chm	FBgn0028387	CG5229
chn	FBgn0015371	CG11798
Cht2	FBgn0022702	CG2054
Cht7	FBgn0035398	CG1869
cib	FBgn0026084	CG4944
cid	FBgn0040477	CG13329
cin	FBgn0000316	CG2945
cindr	FBgn0027598	CG31012
Cip4	FBgn0035533	CG15015
ckd	FBgn0035427	CG14959
CkIalpha	FBgn0015024	CG2028
CkIIalpha	FBgn0000258	CG17520
Cks85A	FBgn0037613	CG9790
Clect27	FBgn0031629	CG3244
Clic	FBgn0030529	CG10997
clos	FBgn0261016	CG42600
comm	FBgn0010105	CG17943
comr	FBgn0034667	CG13493
COQ7	FBgn0029502	CG14437
corn	FBgn0259173	CG42278
corto	FBgn0010313	CG2530
Cp1	FBgn0013770	CG6692
Cpr35B	FBgn0028871	CG3474
CR14033	FBgn0046776	CR14033
CR31514	FBgn0051514	CR31514
CR31845	FBgn0051845	CR31845
CR32385	FBgn0047205	CR32385
CR33283	FBgn0053283	CR33283
CR33987	FBgn0053987	CR33987
CR42862	FBgn0262109	CR42862
CR43258	FBgn0262903	CR43258
CR43314	FBgn0263019	CR43314
CR43399	FBgn0263290	CR43399
crp	FBgn0001994	CG7664
CTPsyn	FBgn0262707	CG45070
cv-c	FBgn0086901	CG34389
CycE	FBgn0010382	CG3938
CycG	FBgn0039858	CG11525
Cyp4ac1	FBgn0031693	CG14032
Cyp4ac2	FBgn0031694	CG17970
Cyp4ac3	FBgn0031695	CG14031
Cyp4ae1	FBgn0015036	CG10755
Cyp4d20	FBgn0035344	CG16761
Cyp4p2	FBgn0033395	CG1944
Cyp6d5	FBgn0038194	CG3050
Cyp6v1	FBgn0031126	CG1829
Cyt-c-p	FBgn0000409	CG17903
D1	FBgn0000412	CG9745
Dad	FBgn0020493	CG5201
dally	FBgn0011577	CG4974
Dcp-1	FBgn0010501	CG5370
debcl	FBgn0029131	CG33134
Den1	FBgn0033716	CG8493
desat1	FBgn0086687	CG5887
dgt5	FBgn0033740	CG8828
Dhc93AB	FBgn0013812	CG3723
Dl	FBgn0000463	CG3619
dnt	FBgn0024245	CG17559
dob	FBgn0030607	CG5560
dod	FBgn0015379	CG17051
dor	FBgn0000482	CG3093
dpn	FBgn0010109	CG8704
drl	FBgn0015380	CG17348
drongo	FBgn0020304	CG3365
ds	FBgn0000497	CG17941
Duox	FBgn0031464	CG3131
E23	FBgn0020445	CG3327
ea	FBgn0000533	CG4920
eas	FBgn0000536	CG3525
ec	FBgn0000542	CG2904
edl	FBgn0023214	CG15085
EDTP	FBgn0027506	CG6542
Egfr	FBgn0003731	CG10079
egh	FBgn0001404	CG9659
eIF5	FBgn0030719	CG9177
eIF5B	FBgn0026259	CG10840
Eip71CD	FBgn0000565	CG7266
emp	FBgn0010435	CG2727
ena	FBgn0000578	CG15112
esn	FBgn0028642	CG43722
ETH	FBgn0028738	CG18105
Ets98B	FBgn0005659	CG5583
ex	FBgn0004583	CG4114
exu	FBgn0000615	CG8994
fabp	FBgn0037913	CG6783
Fas3	FBgn0000636	CG5803
fbl6	FBgn0033609	CG13213
fend	FBgn0030090	CG12664
Fer1HCH	FBgn0015222	CG2216
Fer2LCH	FBgn0015221	CG1469
Fer3HCH	FBgn0030449	CG4349
Fib	FBgn0003062	CG9888
fig	FBgn0039694	CG7615
fng	FBgn0011591	CG10580
fok	FBgn0020303	CG43690
fra	FBgn0011592	CG8581
fray	FBgn0023083	CG7693
ft	FBgn0001075	CG3352
fwd	FBgn0004373	CG7004
fz	FBgn0001085	CG17697
fz2	FBgn0016797	CG9739
fz3	FBgn0027343	CG16785
Gadd45	FBgn0033153	CG11086
Gale	FBgn0035147	CG12030
galectin	FBgn0031213	CG11372
GalNAc-T1	FBgn0034025	CG8182
Gap1	FBgn0004390	CG6721
Gdh	FBgn0001098	CG5320
Gint3	FBgn0034372	CG5469
gk	FBgn0020300	CG13695
glec	FBgn0015229	CG6575
gom	FBgn0029084	CG6727
Gp150	FBgn0013272	CG5820
grp	FBgn0261278	CG17161
GstD9	FBgn0038020	CG10091
GstS1	FBgn0010226	CG8938
Gtp-bp	FBgn0010391	CG2522
gukh	FBgn0026239	CG31043
GV1	FBgn0027790	CG12023
h	FBgn0001168	CG6494
hbs	FBgn0029082	CG7449
Hcs	FBgn0037332	CG14670
hdc	FBgn0010113	CG15532
Hen1	FBgn0033686	CG12367
Hex-A	FBgn0001186	CG3001
Hex-C	FBgn0001187	CG8094
hipk	FBgn0035142	CG17090
HLHm5	FBgn0002631	CG6096
HLHmdelta	FBgn0002734	CG8328
HLHmgamma	FBgn0002735	CG8333
HmgZ	FBgn0010228	CG17921
HP6	FBgn0031613	CG15636
Hph	FBgn0086689	CG44015
Hr78	FBgn0015239	CG7199
Hsc70-3	FBgn0001218	CG4147
Hsp22	FBgn0001223	CG4460
Hsp60	FBgn0015245	CG12101
Hsp67Bb	FBgn0001228	CG4456
Hsp68	FBgn0001230	CG5436
ics	FBgn0028546	CG9031
Idh	FBgn0001248	CG7176
Inos	FBgn0025885	CG11143
IP3K1	FBgn0032147	CG4026
itp	FBgn0035023	CG13586
jbug	FBgn0028371	CG30092
Jheh1	FBgn0010053	CG15101
Jheh2	FBgn0034405	CG15102
jigr1	FBgn0039350	CG17383
jing	FBgn0086655	CG9397
jumu	FBgn0015396	CG4029
kal-1	FBgn0039155	CG6173
kay	FBgn0001297	CG33956
Kdm2	FBgn0037659	CG11033
kek1	FBgn0015399	CG12283
ken	FBgn0011236	CG5575
kermit	FBgn0010504	CG11546
knk	FBgn0001321	CG6217
ko	FBgn0020294	CG10573
koko	FBgn0051232	CG44010
l(1)G0004	FBgn0027334	CG11738
l(1)G0193	FBgn0027280	CG2206
l(1)G0232	FBgn0028341	CG32697
l(2)01810	FBgn0010497	CG5304
l(2)08717	FBgn0010651	CG15095
l(2)tid	FBgn0002174	CG5504
Lac	FBgn0010238	CG12369
lawc	FBgn0262976	CG32711
lea	FBgn0002543	CG5481
lectin-21Ca	FBgn0040107	CG2826
lectin-21Cb	FBgn0040106	CG13686
lectin-37Db	FBgn0053533	CG33533
lectin-46Ca	FBgn0040093	CG1656
lectin-46Cb	FBgn0040092	CG1652
Lk	FBgn0028418	CG13480
Lpin	FBgn0033269	CG8709
Lrt	FBgn0034540	CG11136
LS2	FBgn0034834	CG3162
Lsd-2	FBgn0030608	CG9057
Lsp1gamma	FBgn0002564	CG6821
lute	FBgn0262871	CG43226
m1	FBgn0002578	CG8342
m4	FBgn0002629	CG6099
Magi	FBgn0034590	CG30388
magu	FBgn0262169	CG2264
mas	FBgn0011653	CG15002
MCPH1	FBgn0260959	CG42572
mdy	FBgn0004797	CG31991
MEP-1	FBgn0035357	CG1244
Mesh1	FBgn0039650	CG11900
MESR3	FBgn0032694	CG15162
Mfe2	FBgn0030731	CG3415
mib1	FBgn0036558	CG5841
milt	FBgn0262872	CG43227
miple2	FBgn0029002	CG18321
mir-125	FBgn0262456	CR43029
mir-2281	FBgn0262327	CR43034
mir-965	FBgn0262252	CR42959
mir-997	FBgn0262262	CR42969
mir-998	FBgn0262405	CR42948
Mkp3	FBgn0036844	CG14080
mld	FBgn0083077	CG34100
mmy	FBgn0259749	CG9535
Mocs1	FBgn0263241	CG33048
mof	FBgn0014340	CG3025
MP1	FBgn0027930	CG1102
mrj	FBgn0034091	CG8448
mRNA-cap	FBgn0030556	CG1810
mRpL38	FBgn0030552	CG15871
mRpS33	FBgn0038426	CG10406
msi	FBgn0011666	CG5099
Msr-110	FBgn0015766	CG10596
Mst77F	FBgn0086915	CG3354
mthl5	FBgn0037960	CG6965
Mur2B	FBgn0025390	CG14796
Myo61F	FBgn0010246	CG9155
nab	FBgn0259986	CG33545
nahoda	FBgn0034797	CG12781
neb	FBgn0004374	CG10718
nec	FBgn0002930	CG1857
neo	FBgn0039704	CG7802
net	FBgn0002931	CG11450
Neu3	FBgn0051314	CG7649
neur	FBgn0002932	CG11988
NijA	FBgn0036101	CG6449
nkd	FBgn0002945	CG11614
Not1	FBgn0085436	CG34407
Notum	FBgn0044028	CG13076
Nrg	FBgn0002968	CG1634
nudC	FBgn0021768	CG9710
nuf	FBgn0013718	CG33991
Nup44A	FBgn0033247	CG8722
Nup58	FBgn0038722	CG7360
nyo	FBgn0039852	CG1499
Oatp30B	FBgn0032123	CG3811
Obp44a	FBgn0033268	CG2297
Obp51a	FBgn0043530	CG30473
Obp56i	FBgn0043532	CG30448
Obp83g	FBgn0046875	CG31558
Ocho	FBgn0040296	CG3396
ogre	FBgn0004646	CG3039
omd	FBgn0038168	CG9591
opa1-like	FBgn0261276	CG8479
Or71a	FBgn0036474	CG17871
Orct2	FBgn0086365	CG13610
osp	FBgn0003016	CG3479
otk	FBgn0004839	CG8967
p130CAS	FBgn0035101	CG1212
pAbp	FBgn0261619	CG5119
Paip2	FBgn0038100	CG12358
Past1	FBgn0016693	CG6148
Patj	FBgn0067864	CG12021
pburs	FBgn0032546	CG15284
Pcp	FBgn0003046	CG3440
pcs	FBgn0033988	CG7761
Pdk	FBgn0017558	CG8808
PebIII	FBgn0011695	CG11390
pelo	FBgn0011207	CG3959
Pepck	FBgn0003067	CG17725
pex2	FBgn0035876	CG7081
pgant5	FBgn0031681	CG31651
PGRP-LE	FBgn0030695	CG8995
Phk-3	FBgn0035089	CG9358
pico	FBgn0261811	CG11940
pigs	FBgn0029881	CG3973
pio	FBgn0020521	CG3541
PIP82	FBgn0024943	CG11219
pk	FBgn0003090	CG11084
PKD	FBgn0038603	CG7125
Pli	FBgn0025574	CG5212
pncr011:3L	FBgn0083068	CR33947
Pngl	FBgn0033050	CG7865
Poc1	FBgn0036354	CG10191
polybromo	FBgn0039227	CG11375
pot	FBgn0250871	CG2467
PpN58A	FBgn0025573	CG3245
Prosap	FBgn0040752	CG30483
ps	FBgn0261552	CG42670
Psa	FBgn0261243	CG1009
Ptpmeg	FBgn0261985	CG1228
puc	FBgn0243512	CG7850
PyK	FBgn0003178	CG7070
qjt	FBgn0036730	CG13732
qsm	FBgn0028622	CG13432
RanGap	FBgn0003346	CG9999
Rapgap1	FBgn0085403	CG44086
Rbp1-like	FBgn0030479	CG1987
Reck	FBgn0036463	CG5392
ref2	FBgn0032439	CG17031
Reg-5	FBgn0015801	CG2928
rgn	FBgn0261258	CG6014
rho-4	FBgn0030318	CG1697
RhoGEF3	FBgn0259743	CG43976
RhoL	FBgn0014380	CG9366
Rm62	FBgn0003261	CG10279
RnpS1	FBgn0037707	CG16788
robo	FBgn0005631	CG13521
rost	FBgn0011705	CG9552
rst	FBgn0003285	CG4125
Rtnl1	FBgn0053113	CG33113
rux	FBgn0003302	CG4336
S	FBgn0003310	CG4385
Samuel	FBgn0032330	CG31868
sano	FBgn0034408	CG12758
sas	FBgn0002306	CG2507
Sb	FBgn0003319	CG4316
sc	FBgn0004170	CG3827
scf	FBgn0025682	CG9148
schlank	FBgn0040918	CG3576
sdk	FBgn0021764	CG5227
sea	FBgn0037912	CG6782
Sema-1b	FBgn0016059	CG6446
Ser	FBgn0004197	CG6127
serp	FBgn0260653	CG32209
sesB	FBgn0003360	CG16944
Sfp65A	FBgn0259969	CG42479
shf	FBgn0003390	CG3135
shot	FBgn0013733	CG18076
Shroom	FBgn0085408	CG34379
Sk1	FBgn0030300	CG1747
SKIP	FBgn0051163	CG31163
sli	FBgn0003425	CG43758
sn	FBgn0003447	CG32858
snky	FBgn0086916	CG11281
Snoo	FBgn0085450	CG34421
snoRNA:Me28S-A2589a	FBgn0086023	CR34652
snoRNA:Me28S-A2589c	FBgn0086025	CR34654
snoRNA:Me28S-A30	FBgn0086081	CR34710
snoRNA:Me28S-A3365	FBgn0086040	CR34669
snoRNA:Me28S-A576	FBgn0086080	CR34709
snoRNA:Me28S-C437	FBgn0086032	CR34661
snoRNA:Me28S-U1130	FBgn0086022	CR34651
snoRNA:Me28S-U1230	FBgn0086031	CR34660
snoRNA:Me28S-U1554	FBgn0086060	CR34689
snoRNA:Or-aca1	FBgn0082925	CR34561
snoRNA:Or-CD2	FBgn0086603	CR33636
snoRNA:Psi18S-1347b	FBgn0083053	CR34545
snoRNA:Psi18S-1347c	FBgn0086600	CR33633
snoRNA:Psi18S-1377c	FBgn0083049	CR34627
snoRNA:Psi18S-1377e	FBgn0083047	CR34625
snoRNA:Psi18S-1389a	FBgn0083046	CR34556
snoRNA:Psi18S-1397	FBgn0083044	CR34637
snoRNA:Psi18S-1854a	FBgn0083042	CR34602
snoRNA:Psi18S-1854b	FBgn0083041	CR34600
snoRNA:Psi18S-1854c	FBgn0083040	CR34598
snoRNA:Psi18S-525a	FBgn0083038	CR34570
snoRNA:Psi18S-525c	FBgn0083036	CR34573
snoRNA:Psi18S-525d	FBgn0083035	CR34575
snoRNA:Psi18S-525e	FBgn0083034	CR34577
snoRNA:Psi18S-525f	FBgn0083033	CR34579
snoRNA:Psi18S-525g	FBgn0083032	CR34580
snoRNA:Psi18S-525h	FBgn0083031	CR34582
snoRNA:Psi18S-640b	FBgn0083025	CR34574
snoRNA:Psi18S-640c	FBgn0083024	CR34576
snoRNA:Psi18S-640d	FBgn0083023	CR34578
snoRNA:Psi18S-841a	FBgn0086669	CR33765
snoRNA:Psi18S-841b	FBgn0083018	CR34551
snoRNA:Psi18S-841d	FBgn0083016	CR34555
snoRNA:Psi28S-1135b	FBgn0083011	CR34605
snoRNA:Psi28S-1135c	FBgn0083010	CR34604
snoRNA:Psi28S-1135d	FBgn0083009	CR34603
snoRNA:Psi28S-1135e	FBgn0083008	CR34601
snoRNA:Psi28S-1135f	FBgn0083007	CR34599
snoRNA:Psi28S-1180	FBgn0086658	CR33661
snoRNA:Psi28S-1192a	FBgn0083001	CR34597
snoRNA:Psi28S-1192b	FBgn0083000	CR34596
snoRNA:Psi28S-1192c	FBgn0082999	CR34595
snoRNA:Psi28S-1192d	FBgn0082998	CR34594
snoRNA:Psi28S-1837c	FBgn0082994	CR34638
snoRNA:Psi28S-1936	FBgn0082993	CR34530
snoRNA:Psi28S-2149	FBgn0086664	CR33776
snoRNA:Psi28S-2442b	FBgn0082988	CR34612
snoRNA:Psi28S-2566	FBgn0086661	CR33686
snoRNA:Psi28S-2876	FBgn0086671	CR33646
snoRNA:Psi28S-3091a	FBgn0082979	CR34610
snoRNA:Psi28S-3091b	FBgn0082978	CR34609
snoRNA:Psi28S-3186	FBgn0086662	CR33709
snoRNA:Psi28S-3305b	FBgn0082975	CR34622
snoRNA:Psi28S-3305c	FBgn0082974	CR34624
snoRNA:Psi28S-3316a	FBgn0082972	CR34547
snoRNA:Psi28S-3316b	FBgn0082971	CR34548
snoRNA:Psi28S-3316d	FBgn0082969	CR34552
snoRNA:Psi28S-3316e	FBgn0082968	CR34554
snoRNA:Psi28S-3378	FBgn0082963	CR34549
snoRNA:Psi28S-3385a	FBgn0082962	CR34608
snoRNA:Psi28S-3385b	FBgn0082961	CR34607
snoRNA:Psi28S-3405b	FBgn0082959	CR34620
snoRNA:Psi28S-3405c	FBgn0082958	CR34621
Snp	FBgn0259142	CG44248
Socs36E	FBgn0041184	CG15154
sowah	FBgn0036302	CG10632
Sox14	FBgn0005612	CG3090
SP1173	FBgn0035710	CG10121
spd-2	FBgn0027500	CG17286
Spn28D	FBgn0031973	CG7219
Spn43Aa	FBgn0024294	CG12172
Spn43Ab	FBgn0024293	CG1865
Spn43Ad	FBgn0044011	CG1859
Spn77Ba	FBgn0262057	CG6680
Sptr	FBgn0014032	CG12117
sqz	FBgn0010768	CG5557
Src42A	FBgn0004603	CG44128
Sry-alpha	FBgn0003510	CG17957
Stat92E	FBgn0016917	CG4257
stg	FBgn0003525	CG1395
stv	FBgn0086708	CG32130
T48	FBgn0004359	CG5507
tacc	FBgn0026620	CG9765
TfIIA-L	FBgn0011289	CG5930
Tie	FBgn0014073	CG7525
Tim9b	FBgn0027358	CG17767
tld	FBgn0003719	CG6868
Tm1	FBgn0003721	CG4898
Tmhs	FBgn0262624	CG12026
Top1	FBgn0004924	CG6146
Tpi	FBgn0086355	CG2171
Tpr2	FBgn0032586	CG4599
Traf4	FBgn0026319	CG3048
TRAM	FBgn0040340	CG11642
Tre1	FBgn0046687	CG3171
Trx-2	FBgn0040070	CG31884
Tsf3	FBgn0034094	CG3666
tsh	FBgn0003866	CG1374
tsl	FBgn0003867	CG6705
Tsp42Ee	FBgn0029506	CG10106
tst	FBgn0039117	CG10210
ttk	FBgn0003870	CG1856
tws	FBgn0004889	CG6235
UBL3	FBgn0026076	CG9038
Ugt58Fa	FBgn0040091	CG4414
Uhg7	FBgn0083121	CR42453
unc-119	FBgn0025549	CG1659
Unc-76	FBgn0040395	CG3981
Unr	FBgn0035895	CG7015
uzip	FBgn0004055	CG3533
verm	FBgn0261341	CG8756
VGAT	FBgn0033911	CG8394
Vha100-2	FBgn0028670	CG18617
Vha100-3	FBgn0028669	CG30329
vig	FBgn0024183	CG4170
Vps33B	FBgn0039335	CG5127
vri	FBgn0016076	CG14029
w	FBgn0003996	CG2759
waw	FBgn0024182	CG1410
wdp	FBgn0034718	CG3413
wgn	FBgn0030941	CG6531
whd	FBgn0261862	CG12891
wibg	FBgn0034918	CG30176
Wnt5	FBgn0010194	CG6407
wor	FBgn0001983	CG4158
Wwox	FBgn0031972	CG7221
yellow-c	FBgn0041713	CG4182
yellow-d	FBgn0041712	CG9889
yellow-d2	FBgn0034856	CG9891
yellow-e2	FBgn0038151	CG17044
yellow-e3	FBgn0038150	CG17045

## Sheet: cluster 4b
Gene	FB ID	CG number
A2bp1	FBgn0052062	CG32062
al	FBgn0000061	CG3935
Antp	FBgn0260642	CG1028
aop	FBgn0000097	CG3166
aos	FBgn0004569	CG4531
ap	FBgn0000099	CG8376
ara	FBgn0015904	CG10571
Atg1	FBgn0260945	CG10967
bbg	FBgn0087007	CG42230
bi	FBgn0000179	CG3578
bl	FBgn0015907	CG13425
bowl	FBgn0004893	CG10021
brat	FBgn0010300	CG10719
bs	FBgn0004101	CG3411
Btk29A	FBgn0003502	CG8049
bun	FBgn0259176	CG42281
caup	FBgn0015919	CG10605
CBP	FBgn0026144	CG1435
Cerk	FBgn0037315	CG16708
CG10029	FBgn0037498	CG10029
CG10734	FBgn0034082	CG10734
CG10741	FBgn0036373	CG10741
CG10990	FBgn0030520	CG10990
CG11138	FBgn0030400	CG11138
CG11145	FBgn0033168	CG11145
CG11486	FBgn0035397	CG11486
CG12207	FBgn0038220	CG12207
CG12814	FBgn0037796	CG12814
CG13252	FBgn0037016	CG13252
CG13624	FBgn0039209	CG13624
CG14440	FBgn0029894	CG14440
CG15393	FBgn0031429	CG15393
CG1600	FBgn0033188	CG1600
CG16824	FBgn0040973	CG16824
CG17834	FBgn0028394	CG17834
CG2014	FBgn0039669	CG2014
CG30403	FBgn0050403	CG30403
CG31729	FBgn0051729	CG31729
CG32111	FBgn0052111	CG32111
CG32541	FBgn0052541	CG32541
CG32639	FBgn0052639	CG32639
CG32676	FBgn0052676	CG32676
CG32773	FBgn0052773	CG32773
CG33298	FBgn0032120	CG33298
CG33687	FBgn0053687	CG33687
CG33688	FBgn0053688	CG33688
CG33689	FBgn0053689	CG33689
CG33690	FBgn0053690	CG33690
CG33691	FBgn0064122	CG33691
CG33692	FBgn0064121	CG33692
CG33936	FBgn0053936	CG33936
CG33937	FBgn0053937	CG33937
CG34304	FBgn0085333	CG34304
CG34460	FBgn0085489	CG34460
CG4004	FBgn0030418	CG4004
CG42327	FBgn0259227	CG42327
CG42389	FBgn0259735	CG42389
CG42506	FBgn0260232	CG42506
CG42544	FBgn0260713	CG42544
CG42684	FBgn0261570	CG42684
CG42709	FBgn0261674	CG42709
CG42719	FBgn0261636	CG42719
CG42747	FBgn0261801	CG42747
CG42763	FBgn0261831	CG42763
CG5194	FBgn0035955	CG5194
CG5326	FBgn0038983	CG5326
CG6175	FBgn0036152	CG6175
CG6333	FBgn0036731	CG6333
CG6490	FBgn0039431	CG6490
CG6966	FBgn0038286	CG6966
CG8034	FBgn0031011	CG8034
CG8312	FBgn0037720	CG8312
CG8509	FBgn0030696	CG8509
CG8552	FBgn0031990	CG8552
CG8557	FBgn0030842	CG8557
CG9005	FBgn0033638	CG9005
CG9328	FBgn0032886	CG9328
CG9628	FBgn0036433	CG9628
chinmo	FBgn0086758	CG31666
ci	FBgn0004859	CG2125
cic	FBgn0262582	CG43122
CR32218	FBgn0052218	CR32218
CR42746	FBgn0261709	CR42746
CR43301	FBgn0262993	CR43301
CR43302	FBgn0262994	CR43302
CR43303	FBgn0262995	CR43303
CR43334	FBgn0263039	CR43334
CR43344	FBgn0263049	CR43344
crb	FBgn0259685	CG6383
CrebA	FBgn0004396	CG7450
d	FBgn0262029	CG42840
Dll	FBgn0000157	CG3629
dlp	FBgn0041604	CG32146
dm	FBgn0262656	CG10798
Doc1	FBgn0028789	CG5133
Doc2	FBgn0035956	CG5187
Doc3	FBgn0035954	CG5093
dpp	FBgn0000490	CG9885
Dr	FBgn0000492	CG1897
Drak	FBgn0052666	CG32666
dve	FBgn0020307	CG5799
E2f	FBgn0011766	CG6376
E5	FBgn0008646	CG9930
EcR	FBgn0000546	CG1765
Ect4	FBgn0262579	CG43119
ed	FBgn0000547	CG12676
Eip74EF	FBgn0000567	CG32180
Eip75B	FBgn0000568	CG8127
elB	FBgn0004858	CG4220
ems	FBgn0000576	CG2988
en	FBgn0000577	CG9015
Exn	FBgn0261547	CG42665
eyg	FBgn0000625	CG10488
Fili	FBgn0085397	CG34368
Fps85D	FBgn0000723	CG8874
fru	FBgn0004652	CG14307
ftz-f1	FBgn0001078	CG4059
G-ialpha65A	FBgn0001104	CG10060
gish	FBgn0250823	CG6963
gpp	FBgn0261972	CG42803
grh	FBgn0259211	CG42311
grn	FBgn0001138	CG9656
heph	FBgn0011224	CG31000
hh	FBgn0004644	CG4637
Hr39	FBgn0261239	CG8676
if	FBgn0001250	CG9623
Imp	FBgn0262735	CG1691
InR	FBgn0013984	CG18402
inv	FBgn0001269	CG17835
inx7	FBgn0027106	CG2977
Ir	FBgn0039061	CG44159
jar	FBgn0011225	CG5695
kek5	FBgn0031016	CG12199
kibra	FBgn0262127	CG33967
kis	FBgn0086902	CG3696
klu	FBgn0013469	CG12296
kn	FBgn0001319	CG10197
kni	FBgn0001320	CG4717
knrl	FBgn0001323	CG4761
Kr-h1	FBgn0028420	CG45074
kst	FBgn0004167	CG12008
kuk	FBgn0038476	CG5175
L	FBgn0001332	CG10109
l(1)dd4	FBgn0001612	CG10988
l(3)82Fd	FBgn0013576	CG32464
l(3)L1231	FBgn0086686	CG7832
l(3)neo38	FBgn0086910	CG6930
LamC	FBgn0010397	CG10119
larp	FBgn0261618	CG42551
lbk	FBgn0034083	CG8434
Lk6	FBgn0017581	CG17342
malpha	FBgn0002732	CG8337
melt	FBgn0023001	CG8624
mew	FBgn0004456	CG1771
Mi-2	FBgn0262519	CG8103
mirr	FBgn0014343	CG10601
mnb	FBgn0259168	CG42273
Mnt	FBgn0023215	CG13316
mod(mdg4)	FBgn0002781	CG32491
modSP	FBgn0051217	CG31217
Moe	FBgn0011661	CG10701
mthl1	FBgn0030766	CG4521
N	FBgn0004647	CG3936
nmo	FBgn0011817	CG7892
nub	FBgn0085424	CG34395
numb	FBgn0002973	CG3779
Oatp74D	FBgn0036732	CG7571
odd	FBgn0002985	CG3851
opa	FBgn0003002	CG1133
osa	FBgn0261885	CG7467
ovo	FBgn0003028	CG6824
Pdk1	FBgn0020386	CG1210
pdm2	FBgn0004394	CG12287
pnr	FBgn0003117	CG3978
pnt	FBgn0003118	CG17077
Psc	FBgn0005624	CG3886
psq	FBgn0263102	CG2368
ptc	FBgn0003892	CG2411
pyd	FBgn0262614	CG43140
rdx	FBgn0262907	CG12537
rn	FBgn0259172	CG42277
rols	FBgn0041096	CG32096
rpr	FBgn0011706	CG4319
salm	FBgn0261648	CG6464
salr	FBgn0000287	CG4881
sbb	FBgn0010575	CG5580
sd	FBgn0003345	CG8544
sda	FBgn0015541	CG5518
sdt	FBgn0261873	CG32717
Sema-5c	FBgn0250876	CG5661
sgg	FBgn0003371	CG2621
shn	FBgn0003396	CG7734
simj	FBgn0010762	CG32067
Sip1	FBgn0010620	CG10939
siz	FBgn0026179	CG32434
skd	FBgn0003415	CG9936
smi35A	FBgn0016930	CG4551
SNF4Agamma	FBgn0025803	CG17299
sob	FBgn0004892	CG3242
sog	FBgn0003463	CG9224
Sox15	FBgn0005613	CG8404
spen	FBgn0016977	CG18497
spin	FBgn0086676	CG8428
ss	FBgn0003513	CG6993
step	FBgn0086779	CG11628
sty	FBgn0014388	CG1921
Su(Tpl)	FBgn0014037	CG32217
Sulf1	FBgn0040271	CG6725
tai	FBgn0041092	CG13109
tal-1A	FBgn0259730	CG42384
tal-2A	FBgn0259731	CG42385
tal-3A	FBgn0259732	CG42386
tal-AA	FBgn0259733	CG42387
tara	FBgn0040071	CG6889
tey	FBgn0036899	CG8780
th	FBgn0260635	CG12284
tio	FBgn0028979	CG12630
Tis11	FBgn0011837	CG4070
tkv	FBgn0003716	CG14026
tlk	FBgn0086899	CG34412
tna	FBgn0026160	CG7958
toe	FBgn0036285	CG10704
tou	FBgn0033636	CG10897
trbl	FBgn0028978	CG5408
Treh	FBgn0003748	CG9364
trh	FBgn0262139	CG42865
trx	FBgn0003862	CG8651
tup	FBgn0003896	CG10619
twi	FBgn0003900	CG2956
uif	FBgn0031879	CG9138
ush	FBgn0003963	CG2762
vari	FBgn0250785	CG9326
vfl	FBgn0259789	CG12701
vg	FBgn0003975	CG3830
vn	FBgn0003984	CG10491
W	FBgn0003997	CG5123
wbl	FBgn0004003	CG7225
wg	FBgn0004009	CG4889
wts	FBgn0011739	CG12072
Xrp1	FBgn0261113	CG17836
zfh2	FBgn0004607	CG1449

## Sheet: cluster 5a
Gene	FB ID	CG number
AcCoAS	FBgn0012034	CG9390
Acp24A4	FBgn0051779	CG31779
Acp54A1	FBgn0083936	CG34098
Acp98AB	FBgn0013745	CG43619
Ady43A	FBgn0026602	CG1851
Ahcy89E	FBgn0015011	CG8956
Aldh	FBgn0012036	CG3752
alrm	FBgn0039332	CG11910
amd	FBgn0000075	CG10501
ana	FBgn0011746	CG8084
Aprt	FBgn0000109	CG18315
apt	FBgn0015903	CG5393
Argk	FBgn0000116	CG32031
Art2	FBgn0031592	CG3675
Art9	FBgn0038188	CG9929
Atet	FBgn0020762	CG2969
atilla	FBgn0032422	CG6579
Aven	FBgn0030410	CG15727
Baldspot	FBgn0260960	CG3971
BBS4	FBgn0033578	CG13232
be	FBgn0052594	CG32594
Best2	FBgn0035696	CG10173
BG642312	FBgn0047334	CG33943
bmm	FBgn0036449	CG5295
Cad96Cb	FBgn0039294	CG13664
CAH1	FBgn0027844	CG7820
CCKLR-17D3	FBgn0030954	CG32540
CDase	FBgn0039774	CG1471
CG10026	FBgn0032785	CG10026
CG10200	FBgn0033968	CG10200
CG10211	FBgn0032685	CG10211
CG10262	FBgn0032813	CG10262
CG10298	FBgn0037432	CG10298
CG10337	FBgn0032805	CG10337
CG10344	FBgn0034729	CG10344
CG10348	FBgn0032707	CG10348
CG10440	FBgn0034636	CG10440
CG10512	FBgn0037057	CG10512
CG10550	FBgn0039321	CG10550
CG10559	FBgn0039323	CG10559
CG10566	FBgn0037050	CG10566
CG10570	FBgn0040992	CG10570
CG10581	FBgn0037046	CG10581
CG10623	FBgn0032727	CG10623
CG10639	FBgn0032729	CG10639
CG10657	FBgn0036289	CG10657
CG10822	FBgn0034478	CG10822
CG10863	FBgn0027552	CG10863
CG10877	FBgn0038804	CG10877
CG10924	FBgn0034356	CG10924
CG10931	FBgn0034274	CG10931
CG10936	FBgn0034253	CG10936
CG10970	FBgn0030078	CG10970
CG11030	FBgn0031736	CG11030
CG11073	FBgn0034693	CG11073
CG11147	FBgn0031734	CG11147
CG11200	FBgn0034500	CG11200
CG11231	FBgn0039939	CG11231
CG1124	FBgn0037290	CG1124
CG11263	FBgn0036330	CG11263
CG11353	FBgn0035557	CG11353
CG1136	FBgn0035490	CG1136
CG11400	FBgn0034198	CG11400
CG11437	FBgn0037165	CG11437
CG11438	FBgn0037164	CG11438
CG11455	FBgn0031228	CG11455
CG11498	FBgn0039749	CG11498
CG11550	FBgn0039864	CG11550
CG11619	FBgn0036836	CG11619
CG11739	FBgn0037239	CG11739
CG11756	FBgn0030290	CG11756
CG11779	FBgn0038683	CG11779
CG11825	FBgn0033519	CG11825
CG11842	FBgn0039629	CG11842
CG11843	FBgn0039630	CG11843
CG11852	FBgn0039297	CG11852
CG11905	FBgn0036678	CG11905
CG11983	FBgn0037654	CG11983
CG12014	FBgn0035445	CG12014
CG12065	FBgn0030052	CG12065
CG12075	FBgn0030065	CG12075
CG12164	FBgn0033158	CG12164
CG12224	FBgn0037974	CG12224
CG12395	FBgn0030722	CG12395
CG12481	FBgn0030542	CG12481
CG12560	FBgn0031974	CG12560
CG12680	FBgn0029740	CG12680
CG12725	FBgn0030483	CG12725
CG1273	FBgn0035522	CG1273
CG12769	FBgn0033252	CG12769
CG12851	FBgn0035086	CG12851
CG12964	FBgn0034022	CG12964
CG13004	FBgn0030797	CG13004
CG13045	FBgn0036596	CG13045
CG13046	FBgn0036595	CG13046
CG13049	FBgn0036592	CG13049
CG13050	FBgn0036591	CG13050
CG13064	FBgn0040796	CG13064
CG13079	FBgn0032808	CG13079
CG13081	FBgn0032804	CG13081
CG13082	FBgn0032803	CG13082
CG13116	FBgn0032139	CG13116
CG13117	FBgn0032140	CG13117
CG13124	FBgn0032156	CG13124
CG13130	FBgn0040965	CG13130
CG1315	FBgn0026565	CG1315
CG13177	FBgn0040759	CG13177
CG13183	FBgn0033667	CG13183
CG13188	FBgn0033668	CG13188
CG13239	FBgn0037197	CG13239
CG13251	FBgn0037014	CG13251
CG13258	FBgn0032582	CG13258
CG13280	FBgn0032609	CG13280
CG13284	FBgn0032614	CG13284
CG13299	FBgn0035694	CG13299
CG13305	FBgn0035921	CG13305
CG13397	FBgn0014417	CG13397
CG13405	FBgn0035097	CG13405
CG13430	FBgn0034518	CG13430
CG13454	FBgn0036503	CG13454
CG13563	FBgn0034966	CG13563
CG13564	FBgn0034973	CG13564
CG13606	FBgn0039161	CG13606
CG13618	FBgn0039203	CG13618
CG13622	FBgn0039202	CG13622
CG13631	FBgn0040600	CG13631
CG13639	FBgn0039236	CG13639
CG13640	FBgn0039237	CG13640
CG13654	FBgn0039290	CG13654
CG13675	FBgn0035845	CG13675
CG13737	FBgn0036382	CG13737
CG13791	FBgn0031923	CG13791
CG13822	FBgn0039098	CG13822
CG13875	FBgn0035104	CG13875
CG14036	FBgn0031677	CG14036
CG14050	FBgn0040392	CG14050
CG14059	FBgn0036690	CG14059
CG14105	FBgn0036359	CG14105
CG14117	FBgn0036331	CG14117
CG14135	FBgn0036193	CG14135
CG14207	FBgn0031037	CG14207
CG14253	FBgn0039467	CG14253
CG14282	FBgn0038685	CG14282
CG14301	FBgn0038632	CG14301
CG14314	FBgn0038581	CG14314
CG14315	FBgn0038568	CG14315
CG14326	FBgn0038528	CG14326
CG14327	FBgn0038526	CG14327
CG14329	FBgn0038525	CG14329
CG14331	FBgn0038510	CG14331
CG14372	FBgn0038156	CG14372
CG14451	FBgn0037183	CG14451
CG14455	FBgn0037175	CG14455
CG14506	FBgn0039659	CG14506
CG14515	FBgn0039648	CG14515
CG14566	FBgn0037127	CG14566
CG14567	FBgn0037126	CG14567
CG14598	FBgn0037503	CG14598
CG14632	FBgn0029538	CG14632
CG14642	FBgn0037222	CG14642
CG14757	FBgn0033274	CG14757
CG14798	FBgn0029588	CG14798
CG14879	FBgn0038419	CG14879
CG14915	FBgn0032335	CG14915
CG14946	FBgn0032405	CG14946
CG14968	FBgn0035431	CG14968
CG14984	FBgn0035480	CG14984
CG15046	FBgn0030927	CG15046
CG15059	FBgn0030905	CG15059
CG15152	FBgn0032665	CG15152
CG1516	FBgn0027580	CG1516
CG15211	FBgn0030234	CG15211
CG15212	FBgn0040842	CG15212
CG15258	FBgn0032563	CG15258
CG15282	FBgn0028855	CG15282
CG15461	FBgn0040649	CG15461
CG15526	FBgn0039744	CG15526
CG15529	FBgn0039748	CG15529
CG15546	FBgn0039807	CG15546
CG15589	FBgn0037409	CG15589
CG15625	FBgn0031644	CG15625
CG15628	FBgn0031632	CG15628
CG15629	FBgn0031630	CG15629
CG15673	FBgn0034639	CG15673
CG1572	FBgn0030309	CG1572
CG15739	FBgn0030347	CG15739
CG15742	FBgn0030462	CG15742
CG15756	FBgn0030493	CG15756
CG15766	FBgn0029813	CG15766
CG15822	FBgn0035308	CG15822
CG15861	FBgn0035084	CG15861
CG15879	FBgn0035309	CG15879
CG15917	FBgn0034199	CG15917
CG1628	FBgn0030218	CG1628
CG16704	FBgn0031558	CG16704
CG16786	FBgn0034974	CG16786
CG1681	FBgn0030484	CG1681
CG16820	FBgn0032495	CG16820
CG16947	FBgn0031816	CG16947
CG1698	FBgn0033443	CG1698
CG16985	FBgn0035355	CG16985
CG16986	FBgn0035356	CG16986
CG17036	FBgn0032449	CG17036
CG17104	FBgn0040496	CG17104
CG17323	FBgn0032713	CG17323
CG17325	FBgn0040993	CG17325
CG17549	FBgn0032774	CG17549
CG17572	FBgn0032753	CG17572
CG17600	FBgn0031195	CG17600
CG17648	FBgn0031364	CG17648
CG17738	FBgn0038009	CG17738
CG17777	FBgn0040900	CG17777
CG17778	FBgn0023534	CG17778
CG18065	FBgn0034519	CG18065
CG18193	FBgn0037579	CG18193
CG18371	FBgn0033893	CG18371
CG18516	FBgn0038350	CG18516
CG18547	FBgn0037973	CG18547
CG18622	FBgn0038460	CG18622
CG18641	FBgn0031426	CG18641
CG18765	FBgn0042110	CG18765
CG18810	FBgn0042133	CG18810
CG1887	FBgn0035290	CG1887
CG1888	FBgn0033421	CG1888
CG1971	FBgn0039881	CG1971
CG1983	FBgn0039751	CG1983
CG1988	FBgn0037464	CG1988
CG2003	FBgn0039886	CG2003
CG2016	FBgn0250839	CG2016
CG2022	FBgn0037292	CG2022
CG2064	FBgn0033205	CG2064
CG2065	FBgn0033204	CG2065
CG2145	FBgn0030251	CG2145
CG2201	FBgn0032955	CG2201
CG2543	FBgn0030407	CG2543
CG2641	FBgn0037518	CG2641
CG2736	FBgn0035090	CG2736
CG2781	FBgn0037534	CG2781
CG2816	FBgn0031564	CG2816
CG2975	FBgn0031468	CG2975
CG30022	FBgn0050022	CG30022
CG30080	FBgn0050080	CG30080
CG3009	FBgn0029720	CG3009
CG30093	FBgn0050093	CG30093
CG30115	FBgn0050115	CG30115
CG30177	FBgn0050177	CG30177
CG30184	FBgn0050184	CG30184
CG30194	FBgn0050194	CG30194
CG30196	FBgn0050196	CG30196
CG30197	FBgn0050197	CG30197
CG30269	FBgn0050269	CG30269
CG30273	FBgn0050273	CG30273
CG30288	FBgn0050288	CG30288
CG3036	FBgn0031645	CG3036
CG30377	FBgn0050377	CG30377
CG30413	FBgn0050413	CG30413
CG30424	FBgn0050424	CG30424
CG30427	FBgn0043792	CG30427
CG30457	FBgn0050457	CG30457
CG30460	FBgn0050460	CG30460
CG3074	FBgn0034709	CG3074
CG31033	FBgn0039705	CG31033
CG31038	FBgn0051038	CG31038
CG31075	FBgn0051075	CG31075
CG31076	FBgn0051076	CG31076
CG31098	FBgn0051098	CG31098
CG31102	FBgn0051102	CG31102
CG31103	FBgn0051103	CG31103
CG31178	FBgn0064912	CG31178
CG31207	FBgn0051207	CG31207
CG31248	FBgn0051248	CG31248
CG31262	FBgn0051262	CG31262
CG31279	FBgn0051279	CG31279
CG31287	FBgn0051287	CG31287
CG31320	FBgn0051320	CG31320
CG31337	FBgn0051337	CG31337
CG31370	FBgn0051370	CG31370
CG31436	FBgn0051436	CG31436
CG31517	FBgn0047199	CG31517
CG31522	FBgn0051522	CG31522
CG31531	FBgn0051531	CG31531
CG31626	FBgn0051626	CG31626
CG3164	FBgn0025683	CG3164
CG31647	FBgn0051647	CG31647
CG31668	FBgn0051668	CG31668
CG31673	FBgn0051673	CG31673
CG3168	FBgn0029896	CG3168
CG31693	FBgn0051693	CG31693
CG31705	FBgn0028490	CG31705
CG31720	FBgn0051720	CG31720
CG31759	FBgn0051759	CG31759
CG31778	FBgn0051778	CG31778
CG3184	FBgn0029892	CG3184
CG31869	FBgn0051869	CG31869
CG31871	FBgn0051871	CG31871
CG31948	FBgn0051948	CG31948
CG31952	FBgn0051952	CG31952
CG31955	FBgn0051955	CG31955
CG31958	FBgn0051958	CG31958
CG31960	FBgn0051960	CG31960
CG31974	FBgn0051974	CG31974
CG31975	FBgn0051975	CG31975
CG31976	FBgn0051976	CG31976
CG32036	FBgn0052036	CG32036
CG32068	FBgn0052068	CG32068
CG32160	FBgn0052160	CG32160
CG32240	FBgn0052240	CG32240
CG32319	FBgn0052319	CG32319
CG32365	FBgn0052365	CG32365
CG32368	FBgn0052368	CG32368
CG32369	FBgn0052369	CG32369
CG32459	FBgn0052459	CG32459
CG32462	FBgn0052462	CG32462
CG32485	FBgn0052485	CG32485
CG32512	FBgn0052512	CG32512
CG32572	FBgn0052572	CG32572
CG32625	FBgn0052625	CG32625
CG32645	FBgn0052645	CG32645
CG32694	FBgn0052694	CG32694
CG32758	FBgn0052758	CG32758
CG32801	FBgn0052801	CG32801
CG32812	FBgn0025642	CG32812
CG33054	FBgn0053054	CG33054
CG33056	FBgn0053056	CG33056
CG33099	FBgn0053099	CG33099
CG33136	FBgn0053136	CG33136
CG33225	FBgn0053225	CG33225
CG33276	FBgn0053276	CG33276
CG33284	FBgn0053284	CG33284
CG33293	FBgn0053293	CG33293
CG33465	FBgn0053465	CG33465
CG33467	FBgn0053467	CG33467
CG33468	FBgn0053468	CG33468
CG33469	FBgn0053469	CG33469
CG33474	FBgn0053474	CG33474
CG3349	FBgn0036459	CG3349
CG3355	FBgn0031619	CG3355
CG33626	FBgn0053626	CG33626
CG33627	FBgn0053627	CG33627
CG33640	FBgn0053640	CG33640
CG33700	FBgn0053700	CG33700
CG33797	FBgn0053797	CG33797
CG33914	FBgn0053914	CG33914
CG33919	FBgn0053919	CG33919
CG33985	FBgn0053985	CG33985
CG33993	FBgn0053993	CG33993
CG34010	FBgn0054010	CG34010
CG34021	FBgn0054021	CG34021
CG34038	FBgn0054038	CG34038
CG34044	FBgn0054044	CG34044
CG34046	FBgn0054046	CG34046
CG34050	FBgn0054050	CG34050
CG34052	FBgn0054052	CG34052
CG3409	FBgn0033095	CG3409
CG34115	FBgn0083951	CG34115
CG34165	FBgn0085194	CG34165
CG34196	FBgn0085225	CG34196
CG34206	FBgn0085235	CG34206
CG34229	FBgn0259832	CG34229
CG34249	FBgn0085278	CG34249
CG34256	FBgn0085285	CG34256
CG34261	FBgn0085290	CG34261
CG34281	FBgn0085310	CG34281
CG34289	FBgn0085318	CG34289
CG34305	FBgn0085334	CG34305
CG34308	FBgn0085337	CG34308
CG34314	FBgn0085343	CG34314
CG34336	FBgn0085365	CG34336
CG34338	FBgn0085367	CG34338
CG34347	FBgn0085376	CG34347
CG34350	FBgn0085379	CG34350
CG34406	FBgn0085435	CG34406
CG34423	FBgn0085452	CG34423
CG34424	FBgn0085453	CG34424
CG34445	FBgn0085474	CG34445
CG34446	FBgn0085475	CG34446
CG34453	FBgn0085482	CG34453
CG34454	FBgn0085483	CG34454
CG3513	FBgn0031559	CG3513
CG3546	FBgn0029716	CG3546
CG3568	FBgn0029710	CG3568
CG3600	FBgn0026087	CG3600
CG3603	FBgn0029648	CG3603
CG3625	FBgn0031245	CG3625
CG3649	FBgn0034785	CG3649
CG3726	FBgn0029824	CG3726
CG3746	FBgn0034755	CG3746
CG3829	FBgn0035091	CG3829
CG3842	FBgn0029866	CG3842
CG3884	FBgn0033786	CG3884
CG3916	FBgn0038003	CG3916
CG3919	FBgn0036423	CG3919
CG3927	FBgn0034739	CG3927
CG4096	FBgn0029791	CG4096
CG4115	FBgn0038017	CG4115
CG4116	FBgn0029649	CG4116
CG4186	FBgn0040634	CG4186
CG4210	FBgn0038302	CG4210
CG42269	FBgn0259164	CG42269
CG42305	FBgn0259201	CG42305
CG42342	FBgn0259244	CG42342
CG42362	FBgn0259708	CG42362
CG42363	FBgn0259709	CG42363
CG42367	FBgn0259713	CG42367
CG42377	FBgn0259744	CG42377
CG42388	FBgn0259734	CG42388
CG42445	FBgn0259916	CG42445
CG42490	FBgn0086200	CG42490
CG42495	FBgn0260027	CG42495
CG42502	FBgn0260228	CG42502
CG42514	FBgn0260388	CG42514
CG42533	FBgn0260486	CG42533
CG42552	FBgn0260754	CG42552
CG4259	FBgn0031389	CG4259
CG42662	FBgn0261538	CG42662
CG42663	FBgn0261545	CG42663
CG42666	FBgn0261548	CG42666
CG42669	FBgn0261551	CG42669
CG42694	FBgn0261584	CG42694
CG42699	FBgn0261610	CG42699
CG42714	FBgn0261631	CG42714
CG42736	FBgn0261700	CG42736
CG42749	FBgn0261803	CG42749
CG42752	FBgn0261806	CG42752
CG42794	FBgn0261927	CG42794
CG42807	FBgn0261989	CG42807
CG42808	FBgn0261990	CG42808
CG42846	FBgn0262035	CG42846
CG42848	FBgn0262095	CG42848
CG42867	FBgn0262141	CG42867
CG42868	FBgn0262142	CG42868
CG43103	FBgn0262563	CG43103
CG43107	FBgn0262567	CG43107
CG43116	FBgn0262576	CG43116
CG43121	FBgn0262581	CG43121
CG43144	FBgn0262620	CG43144
CG43149	FBgn0262679	CG43149
CG43150	FBgn0262680	CG43150
CG43151	FBgn0262681	CG43151
CG43156	FBgn0262686	CG43156
CG43196	FBgn0262825	CG43196
CG43203	FBgn0262839	CG43203
CG43230	FBgn0262875	CG43230
CG43243	FBgn0262888	CG43243
CG43245	FBgn0262890	CG43245
CG43246	FBgn0262891	CG43246
CG4325	FBgn0026878	CG4325
CG43260	FBgn0262905	CG43260
CG43268	FBgn0262949	CG43268
CG43273	FBgn0262962	CG43273
CG43278	FBgn0262967	CG43278
CG43293	FBgn0262985	CG43293
CG4330	FBgn0030452	CG4330
CG43318	FBgn0263023	CG43318
CG43319	FBgn0263024	CG43319
CG43322	FBgn0263027	CG43322
CG43324	FBgn0263029	CG43324
CG43325	FBgn0263030	CG43325
CG43326	FBgn0263031	CG43326
CG43335	FBgn0263040	CG43335
CG43336	FBgn0263041	CG43336
CG43340	FBgn0263077	CG43340
CG43353	FBgn0263085	CG43353
CG43354	FBgn0263086	CG43354
CG4374	FBgn0039078	CG4374
CG4404	FBgn0030432	CG4404
CG4497	FBgn0031895	CG4497
CG4576	FBgn0038366	CG4576
CG4592	FBgn0032162	CG4592
CG4594	FBgn0032161	CG4594
CG4597	FBgn0035594	CG4597
CG4702	FBgn0037992	CG4702
CG4822	FBgn0031220	CG4822
CG4860	FBgn0037999	CG4860
CG4872	FBgn0030799	CG4872
CG4893	FBgn0036616	CG4893
CG4942	FBgn0035960	CG4942
CG5004	FBgn0260748	CG5004
CG5036	FBgn0028743	CG5036
CG5089	FBgn0034144	CG5089
CG5122	FBgn0032471	CG5122
CG5213	FBgn0038345	CG5213
CG5217	FBgn0038694	CG5217
CG5278	FBgn0038986	CG5278
CG5281	FBgn0037902	CG5281
CG5377	FBgn0038974	CG5377
CG5391	FBgn0038943	CG5391
CG5431	FBgn0034888	CG5431
CG5535	FBgn0036764	CG5535
CG5639	FBgn0039527	CG5639
CG5687	FBgn0035293	CG5687
CG5758	FBgn0032666	CG5758
CG5835	FBgn0038682	CG5835
CG5873	FBgn0038511	CG5873
CG5928	FBgn0029836	CG5928
CG6044	FBgn0034725	CG6044
CG6045	FBgn0038349	CG6045
CG6055	FBgn0031918	CG6055
CG6084	FBgn0086254	CG6084
CG6118	FBgn0038339	CG6118
CG6126	FBgn0038407	CG6126
CG6209	FBgn0033862	CG6209
CG6310	FBgn0036121	CG6310
CG6357	FBgn0033875	CG6357
CG6421	FBgn0025827	CG6421
CG6424	FBgn0028494	CG6424
CG6426	FBgn0034162	CG6426
CG6461	FBgn0030932	CG6461
CG6553	FBgn0033880	CG6553
CG6656	FBgn0038912	CG6656
CG6675	FBgn0032973	CG6675
CG6690	FBgn0038918	CG6690
CG6739	FBgn0031926	CG6739
CG6753	FBgn0038070	CG6753
CG6762	FBgn0030876	CG6762
CG6836	FBgn0036834	CG6836
CG6908	FBgn0037936	CG6908
CG7016	FBgn0039238	CG7016
CG7054	FBgn0038972	CG7054
CG7059	FBgn0038957	CG7059
CG7079	FBgn0038849	CG7079
CG7173	FBgn0037099	CG7173
CG7194	FBgn0035868	CG7194
CG7231	FBgn0031968	CG7231
CG7320	FBgn0036782	CG7320
CG7365	FBgn0036939	CG7365
CG7432	FBgn0038727	CG7432
CG7582	FBgn0039681	CG7582
CG7695	FBgn0038631	CG7695
CG7724	FBgn0036698	CG7724
CG7778	FBgn0032025	CG7778
CG7798	FBgn0034092	CG7798
CG7841	FBgn0036502	CG7841
CG7860	FBgn0030653	CG7860
CG7884	FBgn0031001	CG7884
CG7963	FBgn0037584	CG7963
CG7966	FBgn0038115	CG7966
CG7991	FBgn0035260	CG7991
CG8066	FBgn0038243	CG8066
CG8080	FBgn0033373	CG8080
CG8128	FBgn0030668	CG8128
CG8170	FBgn0033365	CG8170
CG8213	FBgn0033359	CG8213
CG8249	FBgn0034045	CG8249
CG8303	FBgn0034143	CG8303
CG8317	FBgn0034140	CG8317
CG8369	FBgn0040532	CG8369
CG8483	FBgn0038126	CG8483
CG8492	FBgn0035813	CG8492
CG8568	FBgn0030841	CG8568
CG8654	FBgn0034479	CG8654
CG8661	FBgn0030837	CG8661
CG8701	FBgn0033287	CG8701
CG8965	FBgn0031745	CG8965
CG9067	FBgn0033605	CG9067
CG9083	FBgn0035077	CG9083
CG9119	FBgn0035189	CG9119
CG9121	FBgn0031675	CG9121
CG9123	FBgn0030629	CG9123
CG9238	FBgn0036428	CG9238
CG9312	FBgn0038179	CG9312
CG9331	FBgn0032889	CG9331
CG9336	FBgn0032897	CG9336
CG9362	FBgn0037696	CG9362
CG9396	FBgn0037714	CG9396
CG9416	FBgn0034438	CG9416
CG9503	FBgn0030598	CG9503
CG9592	FBgn0036426	CG9592
CG9602	FBgn0038175	CG9602
CG9733	FBgn0039759	CG9733
CG9737	FBgn0039758	CG9737
CG9747	FBgn0039754	CG9747
CG9863	FBgn0034846	CG9863
CG9877	FBgn0034819	CG9877
CG9896	FBgn0034808	CG9896
CG9914	FBgn0030737	CG9914
CG9973	FBgn0035378	CG9973
chas	FBgn0263258	CG32556
CheA75a	FBgn0036783	CG7313
CHKov2	FBgn0039328	CG10675
Cht5	FBgn0038180	CG9307
Cht6	FBgn0263132	CG43374
Cpr12A	FBgn0030494	CG15757
Cpr23B	FBgn0031467	CG2973
Cpr31A	FBgn0053302	CG33302
Cpr47Ec	FBgn0033600	CG9077
Cpr47Ed	FBgn0033601	CG9076
Cpr49Ac	FBgn0033725	CG8502
Cpr49Ah	FBgn0033731	CG8515
Cpr51A	FBgn0033942	CG10112
Cpr62Ba	FBgn0035279	CG13934
Cpr65Av	FBgn0052405	CG32405
Cpr65Aw	FBgn0052404	CG32404
Cpr65Ay	FBgn0085300	CG34271
Cpr65Ec	FBgn0035737	CG8634
Cpr66D	FBgn0052029	CG32029
Cpr72Ea	FBgn0036617	CG4818
Cpr72Eb	FBgn0036618	CG12255
Cpr78Cc	FBgn0037069	CG7658
Cpr78E	FBgn0037114	CG7160
CR11700	FBgn0029856	CG11700
CR16735	FBgn0037666	CR16735
CR18166	FBgn0029526	CR18166
CR32252	FBgn0052252	CR32252
CR32660	FBgn0052660	CR32660
CR32661	FBgn0030356	CR32661
CR32745	FBgn0052745	CR32745
CR42786	FBgn0261857	CR42786
CR42838	FBgn0262027	CR42838
CR42875	FBgn0262149	CR42875
CR43148	FBgn0262631	CR43148
CR43157	FBgn0262687	CR43157
CR43257	FBgn0262902	CR43257
CR43276	FBgn0262965	CR43276
CR43300	FBgn0262992	CR43300
Cralbp	FBgn0035636	CG10546
CRMP	FBgn0023023	CG1411
csw	FBgn0000382	CG3954
cu	FBgn0261808	CG31299
cup	FBgn0000392	CG11181
Cyp301a1	FBgn0033753	CG8587
Cyp4c3	FBgn0015032	CG1438
Cyp4e1	FBgn0015034	CG2062
Cyp4e2	FBgn0014469	CG2060
Cyp6a2	FBgn0000473	CG9438
Cyp6d4	FBgn0039006	CG12800
Cyp9c1	FBgn0015040	CG3616
Cys	FBgn0004629	CG8050
DAAM	FBgn0025641	CG14622
Dbi	FBgn0010387	CG8627
Def	FBgn0010385	CG1385
dib	FBgn0000449	CG12028
Dic1	FBgn0027610	CG8790
dmrt11E	FBgn0030477	CG15749
dnr1	FBgn0260866	CG12489
Dpy-30L2	FBgn0035491	CG11591
dream	FBgn0033051	CG7863
Dro	FBgn0010388	CG10816
dro6	FBgn0052268	CG32268
dy	FBgn0004511	CG9355
ebd2	FBgn0037076	CG12972
Edg91	FBgn0004554	CG7539
egr	FBgn0033483	CG12919
eIF4E-6	FBgn0039622	CG1442
Eip78C	FBgn0004865	CG18023
Fas2	FBgn0000635	CG3665
fbp	FBgn0032820	CG31692
Fer3	FBgn0037937	CG6913
Fhos	FBgn0261259	CG42610
Fkbp13	FBgn0010470	CG9847
Fs	FBgn0259878	CG33466
FucTC	FBgn0044872	CG40305
FucTD	FBgn0035217	CG9169
Gef64C	FBgn0035574	CG32239
Gip	FBgn0011770	CG2227
GLaz	FBgn0033799	CG4604
Glut4EF	FBgn0263097	CG34360
Glycogenin	FBgn0034603	CG44244
GNBP2	FBgn0040322	CG4144
Gpo-1	FBgn0022160	CG8256
Gr39b	FBgn0041245	CG31620
Gr93a	FBgn0041229	CG13417
Gr93b	FBgn0045470	CG31336
Grip	FBgn0029830	CG14447
Gs1	FBgn0001142	CG2718
GstD4	FBgn0010040	CG11512
GstE1	FBgn0034335	CG5164
GstE2	FBgn0063498	CG17523
GstE3	FBgn0063497	CG17524
GstE5	FBgn0063495	CG17527
GstE6	FBgn0063494	CG17530
GstE7	FBgn0063493	CG17531
GstE8	FBgn0063492	CG17533
haf	FBgn0261509	CG14351
Hr38	FBgn0014859	CG1864
Hr46	FBgn0000448	CG33183
Hsp67Bc	FBgn0001229	CG4190
Idgf2	FBgn0020415	CG4475
Idgf3	FBgn0020414	CG4559
Idgf4	FBgn0026415	CG1780
Ilp6	FBgn0044047	CG14049
ImpE1	FBgn0001253	CG32356
ImpL1	FBgn0001256	CG10717
ImpL2	FBgn0001257	CG15009
insc	FBgn0011674	CG11312
Ir52a	FBgn0034023	CG12960
Ir85a	FBgn0037630	CG11775
kirre	FBgn0028369	CG3653
l(1)G0469	FBgn0040153	CG32597
l(2)03659	FBgn0010549	CG8799
l(2)34Fc	FBgn0261534	CG7532
l(2)k16918	FBgn0021800	CG3920
Lcp1	FBgn0002531	CG11650
Lcp65Ad	FBgn0020641	CG6955
Lcp65Ae	FBgn0020640	CG10529
Lcp9	FBgn0025578	CG16914
lin-28	FBgn0035626	CG17334
LysS	FBgn0004430	CG1165
mael	FBgn0016034	CG11254
Mdr49	FBgn0004512	CG3879
Men	FBgn0002719	CG10120
mey	FBgn0039851	CG12063
mfas	FBgn0260745	CG3359
Mgstl	FBgn0025814	CG1742
mia	FBgn0014342	CG10390
miple	FBgn0027111	CG1221
mir-2496	FBgn0262297	CR43004
Mlc2	FBgn0002773	CG2184
Mmp1	FBgn0035049	CG4859
mnd	FBgn0002778	CG3297
Mst87F	FBgn0002862	CG17956
mtg	FBgn0260386	CG7549
MtnA	FBgn0002868	CG9470
Nep2	FBgn0027570	CG9761
NetB	FBgn0015774	CG10521
Nmdar1	FBgn0010399	CG2902
Nnf1b	FBgn0051658	CG31658
Npc2a	FBgn0031381	CG7291
nrv2	FBgn0015777	CG9261
NT1	FBgn0261526	CG42576
Ntf-2r	FBgn0032680	CG10174
nvy	FBgn0005636	CG3385
Obp56a	FBgn0034468	CG11797
Obp56d	FBgn0034470	CG11218
Obp83cd	FBgn0046878	CG15582
obst-B	FBgn0027600	CG4778
obst-H	FBgn0053983	CG33983
Ogg1	FBgn0027864	CG1795
olf186-M	FBgn0015522	CG14489
Or67a	FBgn0036009	CG12526
Os-C	FBgn0010401	CG3250
Osi14	FBgn0040279	CG1155
Osi2	FBgn0037410	CG1148
Osi3	FBgn0037411	CG1150
out	FBgn0259834	CG8062
pain	FBgn0060296	CG15860
pb	FBgn0051481	CG31481
Pde8	FBgn0034886	CG45019
Pdp1	FBgn0016694	CG17888
Peritrophin-A	FBgn0022770	CG17058
pgant8	FBgn0036529	CG7297
Pglym87	FBgn0011270	CG17645
PGRP-SA	FBgn0030310	CG11709
Phae2	FBgn0263235	CG16997
phm	FBgn0004959	CG6578
phyl	FBgn0013725	CG10108
Pk17E	FBgn0004462	CG7001
pncr002:3R	FBgn0063127	CR33938
pncr004:X	FBgn0047095	CR33939
pncr017:3R	FBgn0046756	CR33945
ppk	FBgn0020258	CG3478
Proct	FBgn0045038	CG7105
psh	FBgn0030926	CG6367
Ptr	FBgn0262867	CG11212
ptr	FBgn0003159	CG2841
Pu	FBgn0003162	CG9441
Pvf2	FBgn0031888	CG13780
QC	FBgn0052412	CG32412
Rab9	FBgn0032782	CG9994
Rad1	FBgn0026778	CG3240
rap	FBgn0262699	CG3000
rec	FBgn0003227	CG31293
Reg-2	FBgn0016715	CG3200
regucalcin	FBgn0030362	CG1803
repo	FBgn0011701	CG31240
Rgk2	FBgn0085419	CG34390
Rh5	FBgn0014019	CG5279
rhi	FBgn0004400	CG10683
RhoGAP18B	FBgn0261461	CG42274
RluA-2	FBgn0032256	CG6187
roX1	FBgn0019661	CR32777
RpL22-like	FBgn0034837	CG9871
RpS19b	FBgn0039129	CG5338
Rpt3R	FBgn0037742	CG9475
sals	FBgn0051374	CG31374
scaf	FBgn0033033	CG11066
scb	FBgn0003328	CG8095
Sclp	FBgn0030357	CG2471
se	FBgn0086348	CG6781
SelR	FBgn0037847	CG6584
Sesn	FBgn0034897	CG11299
Sfp26Ad	FBgn0261055	CG42603
Sfp84E	FBgn0259974	CG42484
sick	FBgn0260966	CG43720
Skeletor	FBgn0262717	CG43161
slow	FBgn0035539	CG7447
snoRNA:Me18S-G393	FBgn0086030	CR34659
snoRNA:Me18S-G894	FBgn0086047	CR34676
snoRNA:Me28S-A2486	FBgn0086033	CR34662
snoRNA:Me28S-U1688	FBgn0086044	CR34673
snRNA:U12:73B	FBgn0041721	CR32162
snRNA:U3:22A	FBgn0003926	CR31927
snRNA:U6:96Aa	FBgn0004188	CR31379
snRNA:U6:96Ab	FBgn0004189	CR32867
Sobp	FBgn0033654	CG8991
SP2637	FBgn0034371	CG5473
SPE	FBgn0039102	CG16705
spirit	FBgn0030051	CG2056
Spn100A	FBgn0039795	CG1342
Spn28Da	FBgn0051902	CG31902
Spn42Db	FBgn0033112	CG9454
Spn42De	FBgn0033115	CG9460
Spn47C	FBgn0033574	CG7722
spz3	FBgn0031959	CG7104
spz4	FBgn0032362	CG14928
spz6	FBgn0035056	CG9196
srw	FBgn0261952	CG11582
stet	FBgn0020248	CG33166
Takl1	FBgn0046689	CG31421
Thor	FBgn0261560	CG8846
ths	FBgn0033652	CG12443
tRNA:CR32127	FBgn0052127	CR32127
Tsp	FBgn0031850	CG11326
Tsp42Ed	FBgn0029507	CG12846
Tsp42Ei	FBgn0033130	CG12843
Tsp42Ej	FBgn0033132	CG12143
Tsp42Ek	FBgn0033133	CG12841
Tsp42El	FBgn0033134	CG12840
Tsp66E	FBgn0035936	CG4999
Tsp74F	FBgn0036769	CG5492
TwdlU	FBgn0037223	CR14638
tyn	FBgn0029128	CG17131
Ubc-E2H	FBgn0029996	CG2257
Ude	FBgn0039226	CG18410
Ugt35a	FBgn0026315	CG6644
Ugt86Dc	FBgn0040257	CG4739
Ugt86Di	FBgn0040251	CG6658
Ugt86Dj	FBgn0040250	CG15902
upd3	FBgn0053542	CG33542
Vha14-2	FBgn0037402	CG1076
VhaAC39-2	FBgn0039058	CG4624
wb	FBgn0261563	CG42677
Wnt2	FBgn0004360	CG1916
wun	FBgn0016078	CG8804
wun2	FBgn0041087	CG8805
yellow-b	FBgn0032601	CG17914
yellow-e	FBgn0041711	CG9792
yin	FBgn0015565	CG44402
yip3	FBgn0040063	CG13549
zen2	FBgn0004054	CG1048
Zip3	FBgn0038412	CG6898
zormin	FBgn0052311	CG33484

## Sheet: cluster 5b
Gene	FB ID	CG number
Abd-B	FBgn0000015	CG11648
ac	FBgn0000022	CG3796
amn	FBgn0086782	CG11937
AP-2	FBgn0261953	CG7807
ato	FBgn0010433	CG7508
Awh	FBgn0013751	CG1072
B-H1	FBgn0011758	CG5529
B-H2	FBgn0004854	CG5488
bap	FBgn0004862	CG7902
btd	FBgn0000233	CG12653
byn	FBgn0011723	CG7260
C15	FBgn0004863	CG7937
cad	FBgn0000251	CG1759
Cda5	FBgn0051973	CG31973
CG10357	FBgn0035453	CG10357
CG10625	FBgn0035612	CG10625
CG11023	FBgn0031208	CG11023
CG11068	FBgn0030536	CG11068
CG11226	FBgn0037195	CG11226
CG11637	FBgn0036822	CG11637
CG12535	FBgn0029657	CG12535
CG12688	FBgn0029707	CG12688
CG13073	FBgn0036577	CG13073
CG13321	FBgn0033787	CG13321
CG13891	FBgn0035139	CG13891
CG13996	FBgn0031763	CG13996
CG14362	FBgn0038186	CG14362
CG14441	FBgn0029895	CG14441
CG14658	FBgn0037283	CG14658
CG14974	FBgn0040694	CG14974
CG15269	FBgn0028878	CG15269
CG2556	FBgn0030396	CG2556
CG31270	FBgn0051270	CG31270
CG31612	FBgn0051612	CG31612
CG31637	FBgn0051637	CG31637
CG31709	FBgn0051709	CG31709
CG32091	FBgn0052091	CG32091
CG32102	FBgn0052102	CG32102
CG32529	FBgn0052529	CG32529
CG32532	FBgn0052532	CG32532
CG32720	FBgn0052720	CG32720
CG32816	FBgn0052816	CG32816
CG33158	FBgn0053158	CG33158
CG33181	FBgn0053181	CG33181
CG33798	FBgn0053798	CG33798
CG34006	FBgn0054006	CG34006
CG34110	FBgn0083946	CG34110
CG34260	FBgn0085289	CG34260
CG34417	FBgn0085446	CG34417
CG34459	FBgn0085488	CG34459
CG3650	FBgn0035070	CG3650
CG3835	FBgn0023507	CG3835
CG3961	FBgn0036821	CG3961
CG4066	FBgn0038011	CG4066
CG42674	FBgn0261556	CG42674
CG42741	FBgn0261705	CG42741
CG42762	FBgn0261830	CG42762
CG42850	FBgn0262097	CG42850
CG42851	FBgn0262098	CG42851
CG43138	FBgn0262612	CG43138
CG43248	FBgn0262893	CG43248
CG43252	FBgn0262897	CG43252
CG43287	FBgn0262979	CG43287
CG43321	FBgn0263026	CG43321
CG43337	FBgn0263042	CG43337
CG5130	FBgn0037000	CG5130
CG5888	FBgn0028523	CG5888
CG5953	FBgn0032587	CG5953
CG5973	FBgn0031914	CG5973
CG6020	FBgn0037001	CG6020
CG6023	FBgn0030912	CG6023
CG6847	FBgn0030884	CG6847
CG7294	FBgn0032284	CG7294
CG7296	FBgn0032283	CG7296
CG8177	FBgn0036043	CG8177
CG8853	FBgn0031550	CG8853
CG9009	FBgn0027601	CG9009
CG9134	FBgn0035199	CG9134
CG9265	FBgn0032910	CG9265
CG9650	FBgn0029939	CG9650
CG9926	FBgn0038190	CG9926
CHES-1-like	FBgn0029504	CG12690
cnc	FBgn0262975	CG43286
CR42839	FBgn0262028	CR42839
CR43160	FBgn0262690	CR43160
croc	FBgn0014143	CG5069
ct	FBgn0004198	CG11387
cv-2	FBgn0000395	CG15671
D	FBgn0000411	CG5893
dac	FBgn0005677	CG4952
dan	FBgn0039286	CG11849
danr	FBgn0039283	CG13651
dar1	FBgn0263239	CG12029
Dfd	FBgn0000439	CG2189
disco	FBgn0000459	CG9908
disco-r	FBgn0042650	CG32577
dmrt99B	FBgn0039683	CG15504
drm	FBgn0024244	CG10016
dsx	FBgn0000504	CG11094
dys	FBgn0039411	CG32474
eg	FBgn0000560	CG7383
Ets21C	FBgn0005660	CG2914
eve	FBgn0000606	CG2328
exex	FBgn0041156	CG8254
ey	FBgn0005558	CG1464
eya	FBgn0000320	CG9554
fd96Ca	FBgn0004897	CG11921
fd96Cb	FBgn0004898	CG11922
fkh	FBgn0000659	CG10002
for	FBgn0000721	CG10033
fzo	FBgn0011596	CG4568
GATAe	FBgn0038391	CG10278
gcm	FBgn0014179	CG12245
gcm2	FBgn0019809	CG3858
gl	FBgn0004618	CG7672
gsb	FBgn0001148	CG3388
gsb-n	FBgn0001147	CG2692
Gsc	FBgn0010323	CG2851
H15	FBgn0016660	CG6604
H2.0	FBgn0001170	CG11607
ham	FBgn0045852	CG31753
Hand	FBgn0032209	CG18144
HGTX	FBgn0040318	CG13475
iab-4	FBgn0020546	CR31271
Indy	FBgn0036816	CG3979
Kr	FBgn0001325	CG3340
l(1)G0007	FBgn0026713	CG32604
l(2)gl	FBgn0002121	CG2671
lab	FBgn0002522	CG1264
laf	FBgn0020280	CG14660
lbe	FBgn0011278	CG6545
lbl	FBgn0008651	CG6570
Lim1	FBgn0026411	CG11354
lz	FBgn0002576	CG1689
mamo	FBgn0263115	CG44132
Megalin	FBgn0261260	CG42611
mid	FBgn0261963	CG6634
mir-973	FBgn0262201	CR42908
mir-974	FBgn0262216	CR42923
mol	FBgn0086711	CG4482
MRE23	FBgn0262741	CR43126
msa	FBgn0262906	CR43261
nAcRbeta-21C	FBgn0031261	CG11822
NK7.1	FBgn0024321	CG8524
Npc2b	FBgn0038198	CG3153
Nplp1	FBgn0035092	CG3441
Oaz	FBgn0261613	CG42702
oc	FBgn0004102	CG12154
OdsH	FBgn0026058	CG6352
olf186-F	FBgn0041585	CG11430
Optix	FBgn0025360	CG18455
os	FBgn0004956	CG5993
otp	FBgn0015524	CG10036
peb	FBgn0003053	CG12212
pncr008:3L	FBgn0047000	CR33946
Poxm	FBgn0003129	CG9610
Poxn	FBgn0003130	CG8246
prd	FBgn0003145	CG6716
Ptp61F	FBgn0003138	CG9181
rempA	FBgn0260933	CG11838
retn	FBgn0004795	CG5403
rib	FBgn0003254	CG7230
ru	FBgn0003295	CG1214
Rx	FBgn0020617	CG10052
Scr	FBgn0003339	CG1030
sens	FBgn0002573	CG32120
sim	FBgn0004666	CG7771
slp1	FBgn0003430	CG16738
slp2	FBgn0004567	CG2939
so	FBgn0003460	CG11121
Sox100B	FBgn0024288	CG15552
Sox102F	FBgn0039938	CG11153
Sox21b	FBgn0042630	CG32139
SoxN	FBgn0029123	CG18024
Sp1	FBgn0020378	CG1343
spri	FBgn0085443	CG34414
sr	FBgn0003499	CG7847
srp	FBgn0003507	CG3992
ssp3	FBgn0032723	CG18397
Su(z)2	FBgn0008654	CG3905
sv	FBgn0005561	CG11049
svp	FBgn0003651	CG11502
tin	FBgn0004110	CG7895
tre-2	FBgn0084688	CR34648
tre-3	FBgn0084245	CR34647
tRNA:Y1:22Fb	FBgn0012017	CR31986
Ubx	FBgn0003944	CG10388
Ugt37c1	FBgn0026754	CG8652
unc-4	FBgn0024184	CG6269
unpg	FBgn0015561	CG1650
Wnt10	FBgn0031903	CG4971
Wnt6	FBgn0031902	CG4969
yar	FBgn0261559	CR42744
zfh1	FBgn0004606	CG1322
