# Supplementary material for: A large-scale, in vivo transcription factor screen defines bivalent chromatin as a key property of regulatory factors mediating Drosophila wing development
Source: HighWire-hosted journal article supplement (doi:10.1101/gr.181305.114), 2015-01-07
Supplement: Supp_Table3.xlsx [file Supp_Table3.xlsx]

## Sheet: GO_cluster1
Term	Background frequency	Sample frequency	Expected	+/-	P-value
gene expression (GO:0010467)	886	314	90	+	1.271e-81
translation (GO:0006412)	292	176	29.66	+	1.302e-75
cellular macromolecule biosynthetic process (GO:0034645)	687	251	69.79	+	4.884e-66
macromolecule biosynthetic process (GO:0009059)	696	252	70.7	+	1.413e-65
cellular macromolecule metabolic process (GO:0044260)	2294	491	233	+	5.004e-60
cellular metabolic process (GO:0044237)	3260	608	331.2	+	3.972e-57
cellular biosynthetic process (GO:0044249)	1049	292	106.6	+	6.057e-53
biosynthetic process (GO:0009058)	1126	302	114.4	+	1.085e-51
organic substance biosynthetic process (GO:1901576)	1077	294	109.4	+	1.196e-51
cellular protein metabolic process (GO:0044267)	1368	323	139	+	4.379e-44
primary metabolic process (GO:0044238)	3665	603	372.3	+	5.872e-38
macromolecule metabolic process (GO:0043170)	2932	504	297.8	+	3.845e-34
organic substance metabolic process (GO:0071704)	3932	617	399.4	+	8.941e-33
mitotic spindle organization (GO:0007052)	214	98	21.74	+	2.847e-31
cellular process (GO:0009987)	6003	828	609.8	+	1.839e-29
spindle organization (GO:0007051)	244	99	24.79	+	1.502e-27
mitotic spindle elongation (GO:0000022)	79	57	8.025	+	6.273e-27
spindle elongation (GO:0051231)	81	57	8.228	+	2.153e-26
mitotic cell cycle process (GO:1903047)	454	137	46.12	+	4.823e-26
cellular nitrogen compound metabolic process (GO:0034641)	1410	283	143.2	+	6.03e-26
nucleobase-containing compound metabolic process (GO:0006139)	1287	264	130.7	+	2.793e-25
metabolic process (GO:0008152)	4503	650	457.4	+	2.626e-24
mitotic cell cycle (GO:0000278)	508	142	51.61	+	7.021e-24
heterocycle metabolic process (GO:0046483)	1381	272	140.3	+	1.558e-23
protein metabolic process (GO:0019538)	1877	335	190.7	+	1.203e-22
cell cycle process (GO:0022402)	619	157	62.88	+	2.353e-22
cellular aromatic compound metabolic process (GO:0006725)	1415	273	143.7	+	2.541e-22
microtubule cytoskeleton organization (GO:0000226)	396	118	40.23	+	1.07e-21
cell cycle (GO:0007049)	700	167	71.11	+	3.505e-21
organic cyclic compound metabolic process (GO:1901360)	1484	275	150.8	+	5.263e-20
RNA metabolic process (GO:0016070)	625	149	63.49	+	1.291e-18
microtubule-based process (GO:0007017)	501	126	50.89	+	3.159e-17
single-organism organelle organization (GO:1902589)	936	191	95.08	+	4.096e-17
nitrogen compound metabolic process (GO:0006807)	1688	291	171.5	+	6.54e-17
macromolecular complex subunit organization (GO:0043933)	674	151	68.47	+	1.775e-16
nucleic acid metabolic process (GO:0090304)	996	196	101.2	+	5.615e-16
protein complex subunit organization (GO:0071822)	612	139	62.17	+	1.74e-15
RNA processing (GO:0006396)	363	97	36.88	+	1.739e-14
organelle organization (GO:0006996)	1436	247	145.9	+	1.026e-13
ribonucleoprotein complex biogenesis (GO:0022613)	108	46	10.97	+	8.274e-13
cytoskeleton organization (GO:0007010)	605	130	61.46	+	1.42e-12
cellular component organization or biogenesis (GO:0071840)	2278	346	231.4	+	1.581e-12
centrosome duplication (GO:0051298)	82	39	8.33	+	3.811e-12
purine ribonucleoside monophosphate metabolic process (GO:0009167)	109	45	11.07	+	4.923e-12
purine nucleoside monophosphate metabolic process (GO:0009126)	109	45	11.07	+	4.923e-12
ribonucleoside monophosphate metabolic process (GO:0009161)	115	46	11.68	+	7.578e-12
ATP metabolic process (GO:0046034)	97	42	9.854	+	8.015e-12
nucleoside monophosphate metabolic process (GO:0009123)	116	46	11.78	+	1.025e-11
ribosome biogenesis (GO:0042254)	72	35	7.314	+	4.818e-11
sensory perception (GO:0007600)	352	2	35.76	-	5.841e-11
centrosome cycle (GO:0007098)	96	40	9.752	+	1.097e-10
nucleoside triphosphate metabolic process (GO:0009141)	156	51	15.85	+	5.432e-10
mRNA processing (GO:0006397)	248	67	25.19	+	8.931e-10
mRNA splicing, via spliceosome (GO:0000398)	191	57	19.4	+	9.411e-10
RNA splicing, via transesterification reactions with bulged adenosine as nucleophile (GO:0000377)	191	57	19.4	+	9.411e-10
centrosome organization (GO:0051297)	123	44	12.5	+	1.093e-09
RNA splicing (GO:0008380)	203	59	20.62	+	1.104e-09
RNA splicing, via transesterification reactions (GO:0000375)	194	57	19.71	+	1.714e-09
system process (GO:0003008)	543	13	55.16	-	2.31e-09
microtubule organizing center organization (GO:0031023)	127	44	12.9	+	3.039e-09
purine ribonucleoside triphosphate metabolic process (GO:0009205)	154	49	15.64	+	3.799e-09
ribonucleoside triphosphate metabolic process (GO:0009199)	154	49	15.64	+	3.799e-09
purine nucleoside triphosphate metabolic process (GO:0009144)	154	49	15.64	+	3.799e-09
nucleoside metabolic process (GO:0009116)	199	57	20.22	+	4.517e-09
ribonucleoside metabolic process (GO:0009119)	189	55	19.2	+	5.823e-09
glycosyl compound metabolic process (GO:1901657)	203	57	20.62	+	9.554e-09
cellular component organization (GO:0016043)	2221	321	225.6	+	1.024e-08
purine nucleoside metabolic process (GO:0042278)	181	53	18.39	+	1.098e-08
purine ribonucleoside metabolic process (GO:0046128)	181	53	18.39	+	1.098e-08
mitochondrial ATP synthesis coupled electron transport (GO:0042775)	62	29	6.298	+	1.467e-08
nucleoside phosphate metabolic process (GO:0006753)	254	65	25.8	+	1.785e-08
mRNA metabolic process (GO:0016071)	273	68	27.73	+	1.969e-08
ribonucleotide metabolic process (GO:0009259)	196	55	19.91	+	2.193e-08
purine nucleotide metabolic process (GO:0006163)	196	55	19.91	+	2.193e-08
ribose phosphate metabolic process (GO:0019693)	196	55	19.91	+	2.193e-08
neurological system process (GO:0050877)	496	12	50.39	-	2.447e-08
purine ribonucleotide metabolic process (GO:0009150)	192	54	19.5	+	3.029e-08
ATP synthesis coupled electron transport (GO:0042773)	64	29	6.501	+	3.041e-08
respiratory electron transport chain (GO:0022904)	69	30	7.009	+	3.802e-08
oxidative phosphorylation (GO:0006119)	70	30	7.111	+	5.32e-08
nucleotide metabolic process (GO:0009117)	251	63	25.5	+	7.598e-08
electron transport chain (GO:0022900)	73	30	7.416	+	1.405e-07
nucleobase-containing small molecule metabolic process (GO:0055086)	287	68	29.16	+	1.534e-07
purine-containing compound metabolic process (GO:0072521)	215	56	21.84	+	2.148e-07
mitochondrial translation (GO:0032543)	18	15	1.829	+	4.967e-07
mitochondrion organization (GO:0007005)	109	36	11.07	+	8.284e-07
proteasome-mediated ubiquitin-dependent protein catabolic process (GO:0043161)	109	35	11.07	+	2.773e-06
proteasomal protein catabolic process (GO:0010498)	112	35	11.38	+	5.378e-06
signal transduction (GO:0007165)	916	46	93.05	-	9.338e-06
response to chemical (GO:0042221)	819	39	83.2	-	1.069e-05
cellular respiration (GO:0045333)	106	33	10.77	+	1.514e-05
mitochondrial electron transport, NADH to ubiquinone (GO:0006120)	32	17	3.251	+	2.796e-05
G-protein coupled receptor signaling pathway (GO:0007186)	191	1	19.4	-	3.004e-05
energy derivation by oxidation of organic compounds (GO:0015980)	114	33	11.58	+	7.765e-05
cellular component movement (GO:0006928)	575	24	58.41	-	8.124e-05
transcription from RNA polymerase II promoter (GO:0006366)	98	30	9.955	+	8.836e-05
response to stimulus (GO:0050896)	2382	173	242	-	0.0001004
chitin-based cuticle development (GO:0040003)	178	1	18.08	-	0.0001071
rRNA processing (GO:0006364)	36	17	3.657	+	0.0001423
generation of precursor metabolites and energy (GO:0006091)	147	38	14.93	+	0.000153
nucleobase-containing compound biosynthetic process (GO:0034654)	310	63	31.49	+	0.0001546
detection of stimulus (GO:0051606)	198	2	20.11	-	0.0001621
organophosphate metabolic process (GO:0019637)	375	72	38.09	+	0.0001846
protein folding (GO:0006457)	102	30	10.36	+	0.0002003
cellular response to DNA damage stimulus (GO:0006974)	261	55	26.51	+	0.000291
rRNA metabolic process (GO:0016072)	38	17	3.86	+	0.0002957
translational initiation (GO:0006413)	53	20	5.384	+	0.0004369
single-organism cellular process (GO:0044763)	4797	573	487.3	+	0.000472
translational elongation (GO:0006414)	23	13	2.336	+	0.0004924
establishment of protein localization to membrane (GO:0090150)	27	14	2.743	+	0.000524
heterocycle biosynthetic process (GO:0018130)	380	71	38.6	+	0.0005741
appendage development (GO:0048736)	396	14	40.23	-	0.0005835
modification-dependent protein catabolic process (GO:0019941)	207	46	21.03	+	0.0005992
cellular nitrogen compound biosynthetic process (GO:0044271)	374	70	37.99	+	0.0006423
ncRNA processing (GO:0034470)	97	28	9.854	+	0.0006788
modification-dependent macromolecule catabolic process (GO:0043632)	208	46	21.13	+	0.0006794
imaginal disc-derived appendage development (GO:0048737)	393	14	39.92	-	0.0007183
cuticle development (GO:0042335)	223	4	22.65	-	0.0007491
proteolysis involved in cellular protein catabolic process (GO:0051603)	209	46	21.23	+	0.0007695
cellular protein catabolic process (GO:0044257)	209	46	21.23	+	0.0007695
appendage morphogenesis (GO:0035107)	392	14	39.82	-	0.0007697
imaginal disc-derived appendage morphogenesis (GO:0035114)	389	14	39.52	-	0.0009465
post-embryonic appendage morphogenesis (GO:0035120)	382	14	38.81	-	0.001529
aromatic compound biosynthetic process (GO:0019438)	377	69	38.3	+	0.001599
protein catabolic process (GO:0030163)	222	47	22.55	+	0.001642
transcription, DNA-templated (GO:0006351)	171	39	17.37	+	0.00207
ubiquitin-dependent protein catabolic process (GO:0006511)	204	44	20.72	+	0.002108
ncRNA metabolic process (GO:0034660)	146	35	14.83	+	0.002219
behavior (GO:0007610)	521	24	52.93	-	0.002242
cellular component biogenesis (GO:0044085)	769	119	78.12	+	0.002369
mitotic nuclear division (GO:0007067)	192	42	19.5	+	0.002465
RNA biosynthetic process (GO:0032774)	174	39	17.68	+	0.00306
protein localization to membrane (GO:0072657)	32	14	3.251	+	0.003557
response to external stimulus (GO:0009605)	751	42	76.29	-	0.003681
anatomical structure morphogenesis (GO:0009653)	1622	116	164.8	-	0.006192
protein targeting to membrane (GO:0006612)	21	11	2.133	+	0.006495
taxis (GO:0042330)	314	11	31.9	-	0.006892
wing disc morphogenesis (GO:0007472)	344	13	34.95	-	0.007152
detection of chemical stimulus (GO:0009593)	134	1	13.61	-	0.007516
protein phosphorylation (GO:0006468)	248	7	25.19	-	0.007824
locomotion (GO:0040011)	540	27	54.86	-	0.007909
cell surface receptor signaling pathway (GO:0007166)	525	26	53.33	-	0.008609
tissue development (GO:0009888)	733	42	74.46	-	0.008906
nucleoside biosynthetic process (GO:0009163)	50	17	5.079	+	0.01022
ribonucleoside biosynthetic process (GO:0042455)	50	17	5.079	+	0.01022
glycosyl compound biosynthetic process (GO:1901659)	50	17	5.079	+	0.01022
imaginal disc-derived wing morphogenesis (GO:0007476)	338	13	34.34	-	0.01067
single-organism behavior (GO:0044708)	382	16	38.81	-	0.01073
axon development (GO:0061564)	292	10	29.66	-	0.01081
single organism signaling (GO:0044700)	1319	91	134	-	0.01082
signaling (GO:0023052)	1319	91	134	-	0.01082
organic cyclic compound biosynthetic process (GO:1901362)	417	71	42.36	+	0.01192
purine ribonucleoside monophosphate biosynthetic process (GO:0009168)	32	13	3.251	+	0.01572
purine nucleoside monophosphate biosynthetic process (GO:0009127)	32	13	3.251	+	0.01572
axon guidance (GO:0007411)	238	7	24.18	-	0.01665
ribonucleoside monophosphate biosynthetic process (GO:0009156)	37	14	3.759	+	0.01711
metal ion transport (GO:0030001)	147	2	14.93	-	0.01744
ribonucleoprotein complex assembly (GO:0022618)	42	15	4.267	+	0.01757
axonogenesis (GO:0007409)	285	10	28.95	-	0.01765
organ morphogenesis (GO:0009887)	692	40	70.3	-	0.01895
ribosomal small subunit biogenesis (GO:0042274)	9	7	0.9143	+	0.02106
purine ribonucleoside triphosphate biosynthetic process (GO:0009206)	24	11	2.438	+	0.02148
ribonucleoside triphosphate biosynthetic process (GO:0009201)	24	11	2.438	+	0.02148
purine nucleoside triphosphate biosynthetic process (GO:0009145)	24	11	2.438	+	0.02148
nucleoside triphosphate biosynthetic process (GO:0009142)	24	11	2.438	+	0.02148
nucleoside monophosphate biosynthetic process (GO:0009124)	38	14	3.86	+	0.02266
aminoglycan metabolic process (GO:0006022)	144	2	14.63	-	0.02283
ATP biosynthetic process (GO:0006754)	20	10	2.032	+	0.02306
protein localization to endoplasmic reticulum (GO:0070972)	20	10	2.032	+	0.02306
multicellular organism reproduction (GO:0032504)	1075	72	109.2	-	0.02468
regulation of multicellular organismal process (GO:0051239)	545	29	55.36	-	0.02517
regulation of multicellular organismal development (GO:2000026)	394	18	40.02	-	0.02928
regulation of developmental process (GO:0050793)	567	31	57.6	-	0.03098
macromolecular complex assembly (GO:0065003)	385	65	39.11	+	0.03263
cell morphogenesis involved in differentiation (GO:0000904)	460	23	46.73	-	0.03366
post-embryonic organ development (GO:0048569)	473	24	48.05	-	0.03442
cotranslational protein targeting to membrane (GO:0006613)	17	9	1.727	+	0.03528
epithelium development (GO:0060429)	525	28	53.33	-	0.03607
post-embryonic organ morphogenesis (GO:0048563)	445	22	45.21	-	0.03663
imaginal disc morphogenesis (GO:0007560)	445	22	45.21	-	0.03663
purine nucleoside biosynthetic process (GO:0042451)	45	15	4.571	+	0.03746
purine ribonucleoside biosynthetic process (GO:0046129)	45	15	4.571	+	0.03746
chemotaxis (GO:0006935)	258	9	26.21	-	0.03938
cellular macromolecule catabolic process (GO:0044265)	262	48	26.62	+	0.04548
ATP synthesis coupled proton transport (GO:0015986)	18	9	1.829	+	0.05396
energy coupled proton transport, down electrochemical gradient (GO:0015985)	18	9	1.829	+	0.05396
cell communication (GO:0007154)	1375	100	139.7	-	0.05844
ribonucleoprotein complex subunit organization (GO:0071826)	47	15	4.775	+	0.05978
transcription initiation from RNA polymerase II promoter (GO:0006367)	64	18	6.501	+	0.06448
cellular protein complex assembly (GO:0043623)	94	23	9.549	+	0.06512
small molecule metabolic process (GO:0044281)	743	108	75.48	+	0.07317
instar larval or pupal development (GO:0002165)	625	37	63.49	-	0.07529
wing disc development (GO:0035220)	458	24	46.53	-	0.07705
carbohydrate derivative metabolic process (GO:1901135)	494	77	50.18	+	0.08861
neuron projection guidance (GO:0097485)	246	9	24.99	-	0.09008
ion transport (GO:0006811)	387	19	39.31	-	0.09704
regulation of nervous system development (GO:0051960)	214	7	21.74	-	0.09705
mating (GO:0007618)	127	2	12.9	-	0.1032
neuron recognition (GO:0008038)	106	1	10.77	-	0.1065
metamorphosis (GO:0007552)	554	32	56.28	-	0.1104
DNA replication (GO:0006260)	79	20	8.025	+	0.1114
cell morphogenesis involved in neuron differentiation (GO:0048667)	424	22	43.07	-	0.1153
mitochondrial electron transport, cytochrome c to oxygen (GO:0006123)	12	7	1.219	+	0.1215
SRP-dependent cotranslational protein targeting to membrane (GO:0006614)	16	8	1.625	+	0.1269
organelle fission (GO:0048285)	320	54	32.51	+	0.1298
DNA-templated transcription, initiation (GO:0006352)	74	19	7.517	+	0.1324
epithelial cell differentiation (GO:0030855)	339	16	34.44	-	0.1452
anion transport (GO:0006820)	123	2	12.5	-	0.1465
reproduction (GO:0000003)	1198	87	121.7	-	0.1559
nuclear division (GO:0000280)	315	53	32	+	0.1572
post-embryonic development (GO:0009791)	658	41	66.84	-	0.1575
ribonucleotide biosynthetic process (GO:0009260)	64	17	6.501	+	0.1848
ribose phosphate biosynthetic process (GO:0046390)	64	17	6.501	+	0.1848
localization (GO:0051179)	1859	147	188.8	-	0.1876
protein targeting to ER (GO:0045047)	17	8	1.727	+	0.1888
establishment of protein localization to endoplasmic reticulum (GO:0072599)	17	8	1.727	+	0.1888
spindle assembly involved in mitosis (GO:0090307)	47	14	4.775	+	0.1941
cytochrome complex assembly (GO:0017004)	13	7	1.321	+	0.195
transmembrane transport (GO:0055085)	426	23	43.28	-	0.2065
post-embryonic morphogenesis (GO:0009886)	540	32	54.86	-	0.2132
purine ribonucleotide biosynthetic process (GO:0009152)	60	16	6.095	+	0.2582
membrane organization (GO:0061024)	152	30	15.44	+	0.2714
cellular component morphogenesis (GO:0032989)	765	51	77.71	-	0.273
cell redox homeostasis (GO:0045454)	49	14	4.978	+	0.2896
microtubule cytoskeleton organization involved in mitosis (GO:1902850)	49	14	4.978	+	0.2896
establishment of localization (GO:0051234)	1547	120	157.2	-	0.2938
cell morphogenesis (GO:0000902)	655	42	66.54	-	0.2996
carbohydrate derivative biosynthetic process (GO:1901137)	197	36	20.01	+	0.329
instar larval or pupal morphogenesis (GO:0048707)	530	32	53.84	-	0.3368
columnar/cuboidal epithelial cell differentiation (GO:0002065)	269	12	27.33	-	0.3414
localization of cell (GO:0051674)	254	11	25.8	-	0.3604
protein sumoylation (GO:0016925)	4	4	0.4063	+	0.3648
mating behavior (GO:0007617)	112	2	11.38	-	0.3803
columnar/cuboidal epithelial cell development (GO:0002066)	267	12	27.12	-	0.3853
ovarian follicle cell development (GO:0030707)	266	12	27.02	-	0.4092
multicellular organismal process (GO:0032501)	3631	318	368.9	-	0.4242
purine nucleotide biosynthetic process (GO:0006164)	63	16	6.4	+	0.4274
organic anion transport (GO:0015711)	90	1	9.143	-	0.4713
epithelial cell development (GO:0002064)	291	14	29.56	-	0.476
single-organism membrane organization (GO:0044802)	109	23	11.07	+	0.4796
regulation of anatomical structure morphogenesis (GO:0022603)	248	11	25.19	-	0.5208
cellular response to stress (GO:0033554)	437	66	44.39	+	0.5358
transport (GO:0006810)	1491	117	151.5	-	0.5641
single-organism transport (GO:0044765)	1313	101	133.4	-	0.5875
cell motility (GO:0048870)	246	11	24.99	-	0.588
response to organic substance (GO:0010033)	300	15	30.48	-	0.6138
reproductive behavior (GO:0019098)	123	3	12.5	-	0.6715
cell division (GO:0051301)	466	69	47.34	+	0.684
multicellular organismal reproductive behavior (GO:0033057)	105	2	10.67	-	0.6917
hydrogen transport (GO:0006818)	60	15	6.095	+	0.7042
proton transport (GO:0015992)	60	15	6.095	+	0.7042
hydrogen ion transmembrane transport (GO:1902600)	54	14	5.486	+	0.7145
multi-organism behavior (GO:0051705)	170	6	17.27	-	0.7291
imaginal disc development (GO:0007444)	621	41	63.08	-	0.733
regulation of organ morphogenesis (GO:2000027)	85	1	8.635	-	0.7462
regulation of mitotic cell cycle phase transition (GO:1901990)	134	26	13.61	+	0.7596
regulation of cell cycle phase transition (GO:1901987)	134	26	13.61	+	0.7596
neurogenesis (GO:0022008)	1340	170	136.1	+	0.7671
regulation of cell cycle process (GO:0010564)	185	33	18.79	+	0.779
multi-organism reproductive behavior (GO:0044705)	121	3	12.29	-	0.7877
nucleoside phosphate biosynthetic process (GO:1901293)	93	20	9.447	+	0.7888
nucleotide biosynthetic process (GO:0009165)	93	20	9.447	+	0.7888
detection of stimulus involved in sensory perception (GO:0050906)	84	1	8.533	-	0.8177
ribosome assembly (GO:0042255)	5	4	0.5079	+	0.8223
regulation of neurogenesis (GO:0050767)	137	4	13.92	-	0.8229
single-organism cellular localization (GO:1902580)	128	25	13	+	0.8451
single-organism localization (GO:1902578)	128	25	13	+	0.8451
cell projection organization (GO:0030030)	629	42	63.9	-	0.8545
tissue migration (GO:0090130)	152	5	15.44	-	0.8769
negative regulation of cellular catabolic process (GO:0031330)	17	7	1.727	+	0.9026
macromolecule catabolic process (GO:0009057)	310	49	31.49	+	0.9125
multi-organism process (GO:0051704)	1175	90	119.4	-	0.9345
cellular macromolecular complex assembly (GO:0034622)	287	46	29.16	+	0.9488
tail-anchored membrane protein insertion into ER membrane (GO:0071816)	1	1	0.1016	+	1
immune response-activating cell surface receptor signaling pathway (GO:0002429)	1	1	0.1016	+	1
shoot system morphogenesis (GO:0010016)	1	1	0.1016	+	1
ubiquitin-dependent endocytosis (GO:0070086)	1	1	0.1016	+	1
protein-tetrapyrrole linkage (GO:0017006)	1	1	0.1016	+	1
protein-heme linkage (GO:0017003)	1	1	0.1016	+	1
patched ligand maturation (GO:0007225)	1	1	0.1016	+	1
regulation of receptor recycling (GO:0001919)	1	1	0.1016	+	1
non-covalent chromatin modification (GO:0016582)	1	1	0.1016	+	1
apocarotenoid biosynthetic process (GO:0043289)	1	1	0.1016	+	1
apocarotenoid metabolic process (GO:0043288)	1	1	0.1016	+	1
regulation of carbohydrate biosynthetic process (GO:0043255)	1	1	0.1016	+	1
meiotic metaphase I (GO:0007132)	1	1	0.1016	+	1
heme O biosynthetic process (GO:0048034)	1	1	0.1016	+	1
heme o metabolic process (GO:0048033)	1	1	0.1016	+	1
negative regulation of transcription from RNA polymerase I promoter (GO:0016479)	1	1	0.1016	+	1
mitotic telophase (GO:0000093)	1	1	0.1016	+	1
response to molecule of fungal origin (GO:0002238)	1	1	0.1016	+	1
pattern recognition receptor signaling pathway (GO:0002221)	1	1	0.1016	+	1
innate immune response activating cell surface receptor signaling pathway (GO:0002220)	1	1	0.1016	+	1
DNA dealkylation (GO:0035510)	1	1	0.1016	+	1
pyrimidine deoxyribonucleotide interconversion (GO:0015955)	1	1	0.1016	+	1
pyrimidine nucleotide interconversion (GO:0015953)	1	1	0.1016	+	1
positive regulation of GTP cyclohydrolase I activity (GO:0043104)	1	1	0.1016	+	1
nucleobase-containing small molecule interconversion (GO:0015949)	1	1	0.1016	+	1
peroxisomal membrane transport (GO:0015919)	1	1	0.1016	+	1
regulation of protein glycosylation (GO:0060049)	1	1	0.1016	+	1
regulation of mitotic spindle elongation (GO:0032888)	1	1	0.1016	+	1
pyrimidine ribonucleotide catabolic process (GO:0009222)	1	1	0.1016	+	1
regulation of spindle elongation (GO:0032887)	1	1	0.1016	+	1
regulation of polysaccharide biosynthetic process (GO:0032885)	1	1	0.1016	+	1
pyrimidine deoxyribonucleoside triphosphate metabolic process (GO:0009211)	1	1	0.1016	+	1
pyrimidine ribonucleoside triphosphate catabolic process (GO:0009210)	1	1	0.1016	+	1
deoxyribonucleoside triphosphate metabolic process (GO:0009200)	1	1	0.1016	+	1
ectodermal cell fate determination (GO:0001713)	1	1	0.1016	+	1
glycine biosynthetic process (GO:0006545)	1	1	0.1016	+	1
N-terminal protein palmitoylation (GO:0006500)	1	1	0.1016	+	1
dolichyl monophosphate biosynthetic process (GO:0043048)	1	1	0.1016	+	1
positive regulation of cysteine-type endopeptidase activity involved in execution phase of apoptosis (GO:2001272)	1	1	0.1016	+	1
regulation of cysteine-type endopeptidase activity involved in execution phase of apoptosis (GO:2001270)	1	1	0.1016	+	1
Golgi to plasma membrane protein transport (GO:0043001)	1	1	0.1016	+	1
pyrimidine nucleoside triphosphate catabolic process (GO:0009149)	1	1	0.1016	+	1
pore complex assembly (GO:0046931)	1	1	0.1016	+	1
low-density lipoprotein receptor particle metabolic process (GO:0032799)	1	1	0.1016	+	1
histone H3-R2 methylation (GO:0034970)	1	1	0.1016	+	1
regulation of mitochondrial membrane potential (GO:0051881)	1	1	0.1016	+	1
regulation of glucan biosynthetic process (GO:0010962)	1	1	0.1016	+	1
regulation of autophagic vacuole size (GO:0016243)	1	1	0.1016	+	1
translational frameshifting (GO:0006452)	1	1	0.1016	+	1
regulation of translational fidelity (GO:0006450)	1	1	0.1016	+	1
regulation of translational termination (GO:0006449)	1	1	0.1016	+	1
reproductive shoot system development (GO:0090567)	1	1	0.1016	+	1
positive regulation of glucose metabolic process (GO:0010907)	1	1	0.1016	+	1
RNA import into nucleus (GO:0006404)	1	1	0.1016	+	1
negative regulation of endocytic recycling (GO:2001136)	1	1	0.1016	+	1
regulation of glycogen biosynthetic process (GO:0005979)	1	1	0.1016	+	1
positive regulation of histone phosphorylation (GO:0033129)	1	1	0.1016	+	1
regulation of histone phosphorylation (GO:0033127)	1	1	0.1016	+	1
regulation of glycoprotein metabolic process (GO:1903018)	1	1	0.1016	+	1
peristalsis (GO:0030432)	1	1	0.1016	+	1
establishment of chromatin silencing (GO:0006343)	1	1	0.1016	+	1
protein insertion into ER membrane (GO:0045048)	1	1	0.1016	+	1
protein import into peroxisome membrane (GO:0045046)	1	1	0.1016	+	1
DNA dealkylation involved in DNA repair (GO:0006307)	1	1	0.1016	+	1
positive regulation of glycogen metabolic process (GO:0070875)	1	1	0.1016	+	1
maintenance of fidelity involved in DNA-dependent DNA replication (GO:0045005)	1	1	0.1016	+	1
positive regulation of glutamate-cysteine ligase activity (GO:0035229)	1	1	0.1016	+	1
regulation of glutamate-cysteine ligase activity (GO:0035227)	1	1	0.1016	+	1
phosphorylation of RNA polymerase II C-terminal domain (GO:0070816)	1	1	0.1016	+	1
protein phosphopantetheinylation (GO:0018215)	1	1	0.1016	+	1
CTP catabolic process (GO:0006254)	1	1	0.1016	+	1
pyrimidine nucleotide catabolic process (GO:0006244)	1	1	0.1016	+	1
detection of molecule of fungal origin (GO:0032491)	1	1	0.1016	+	1
mature ribosome assembly (GO:0042256)	1	1	0.1016	+	1
endosome localization (GO:0032439)	1	1	0.1016	+	1
lipid glycosylation (GO:0030259)	1	1	0.1016	+	1
protein localization to chromatin (GO:0071168)	1	1	0.1016	+	1
positive regulation of cellular carbohydrate metabolic process (GO:0010676)	1	1	0.1016	+	1
histone H4-R3 methylation (GO:0043985)	1	1	0.1016	+	1
protein K48-linked deubiquitination (GO:0071108)	1	1	0.1016	+	1
regulation of mitotic cell cycle spindle assembly checkpoint (GO:0090266)	1	1	0.1016	+	1
regulation of execution phase of apoptosis (GO:1900117)	1	1	0.1016	+	1
positive regulation of histone H3-K9 dimethylation (GO:1900111)	1	1	0.1016	+	1
regulation of histone H3-K9 dimethylation (GO:1900109)	1	1	0.1016	+	1
intralumenal vesicle formation (GO:0070676)	1	1	0.1016	+	1
regulation of post-translational protein modification (GO:1901873)	1	1	0.1016	+	1
establishment of pole plasm mRNA localization (GO:0046595)	1	1	0.1016	+	1
negative regulation of RNA polymerase I regulatory region sequence-specific DNA binding (GO:1901840)	1	1	0.1016	+	1
regulation of RNA polymerase I regulatory region sequence-specific DNA binding (GO:1901839)	1	1	0.1016	+	1
negative regulation of transcription of nuclear large rRNA transcript from RNA polymerase I promoter (GO:1901837)	1	1	0.1016	+	1
haltere morphogenesis (GO:0048735)	1	1	0.1016	+	1
negative regulation of reactive oxygen species metabolic process (GO:2000378)	1	1	0.1016	+	1
cytochrome c-heme linkage (GO:0018063)	1	1	0.1016	+	1
regulation of glycoprotein biosynthetic process (GO:0010559)	1	1	0.1016	+	1
N-terminal peptidyl-L-cysteine N-palmitoylation (GO:0018009)	1	1	0.1016	+	1
endoplasmic reticulum membrane organization (GO:0090158)	1	1	0.1016	+	1
flower development (GO:0009908)	1	1	0.1016	+	1
D-amino acid metabolic process (GO:0046416)	1	1	0.1016	+	1
phasic smooth muscle contraction (GO:0014821)	1	1	0.1016	+	1
positive regulation of carbohydrate metabolic process (GO:0045913)	1	1	0.1016	+	1
meiotic S phase (GO:0051332)	1	1	0.1016	+	1
meiotic interphase (GO:0051328)	1	1	0.1016	+	1
positive regulation of translational termination (GO:0045905)	1	1	0.1016	+	1
telophase (GO:0051326)	1	1	0.1016	+	1
interphase (GO:0051325)	1	1	0.1016	+	1
positive regulation of translational elongation (GO:0045901)	1	1	0.1016	+	1
negative regulation of translational elongation (GO:0045900)	1	1	0.1016	+	1
S phase (GO:0051320)	1	1	0.1016	+	1
establishment of protein localization to plasma membrane (GO:0090002)	1	1	0.1016	+	1
regulation of membrane lipid distribution (GO:0097035)	1	1	0.1016	+	1
mitochondrial respiratory chain complex IV biogenesis (GO:0097034)	1	1	0.1016	+	1
nuclear pore complex assembly (GO:0051292)	1	1	0.1016	+	1
immune response-regulating cell surface receptor signaling pathway (GO:0002768)	1	1	0.1016	+	1
cell surface pattern recognition receptor signaling pathway (GO:0002752)	1	1	0.1016	+	1
shoot axis formation (GO:0010346)	1	1	0.1016	+	1
regulation of hematopoietic stem cell differentiation (GO:1902036)	1	1	0.1016	+	1
negative regulation of eclosion (GO:0045804)	1	1	0.1016	+	1
replication fork protection (GO:0048478)	1	1	0.1016	+	1
regulation of hematopoietic progenitor cell differentiation (GO:1901532)	1	1	0.1016	+	1
negative regulation of protein binding (GO:0032091)	1	1	0.1016	+	1
ARF protein signal transduction (GO:0032011)	1	1	0.1016	+	1
peptidyl-threonine dephosphorylation (GO:0035970)	1	1	0.1016	+	1
positive regulation of glycogen biosynthetic process (GO:0045725)	1	1	0.1016	+	1
secondary shoot formation (GO:0010223)	1	1	0.1016	+	1
protein peptidyl-prolyl isomerization (GO:0000413)	1	1	0.1016	+	1
histone peptidyl-prolyl isomerization (GO:0000412)	1	1	0.1016	+	1
D-amino acid catabolic process (GO:0019478)	1	1	0.1016	+	1
glycine decarboxylation via glycine cleavage system (GO:0019464)	1	1	0.1016	+	1
minus-end directed microtubule sliding (GO:0031534)	1	1	0.1016	+	1
maintenance of imaginal histoblast diploidy (GO:0007489)	1	1	0.1016	+	1
positive regulation of extent of heterochromatin assembly (GO:0033697)	1	1	0.1016	+	1
regulation of extent of heterochromatin assembly (GO:0031454)	1	1	0.1016	+	1
mitochondrial proton-transporting ATP synthase complex assembly (GO:0033615)	1	1	0.1016	+	1
mitochondrial seryl-tRNA aminoacylation (GO:0070158)	1	1	0.1016	+	1
tRNA aminoacylation for mitochondrial protein translation (GO:0070127)	1	1	0.1016	+	1
mannose biosynthetic process (GO:0019307)	1	1	0.1016	+	1
phospholipid scrambling (GO:0017121)	1	1	0.1016	+	1
dUTP metabolic process (GO:0046080)	1	1	0.1016	+	1
UTP catabolic process (GO:0046052)	1	1	0.1016	+	1
ADP metabolic process (GO:0046031)	2	2	0.2032	+	1
multivesicular body assembly (GO:0036258)	2	1	0.2032	+	1
negative regulation of protein phosphatase type 2A activity (GO:0034048)	2	1	0.2032	+	1
Golgi to endosome transport (GO:0006895)	2	1	0.2032	+	1
regulation of protein phosphatase type 2A activity (GO:0034047)	2	1	0.2032	+	1
cell volume homeostasis (GO:0006884)	2	1	0.2032	+	1
acyl carnitine transport (GO:0006844)	2	1	0.2032	+	1
proton-transporting two-sector ATPase complex assembly (GO:0070071)	2	2	0.2032	+	1
positive regulation of transcription initiation from RNA polymerase II promoter (GO:0060261)	2	1	0.2032	+	1
germarium-derived cystoblast division (GO:0048142)	2	1	0.2032	+	1
selenium compound metabolic process (GO:0001887)	2	1	0.2032	+	1
very long-chain fatty acid catabolic process (GO:0042760)	2	1	0.2032	+	1
mitochondrial respiratory chain complex I assembly (GO:0032981)	2	2	0.2032	+	1
inositol phosphate biosynthetic process (GO:0032958)	2	1	0.2032	+	1
chromatin silencing at centromere (GO:0030702)	2	1	0.2032	+	1
protein processing involved in protein targeting to mitochondrion (GO:0006627)	2	1	0.2032	+	1
protein retention in ER lumen (GO:0006621)	2	2	0.2032	+	1
innate immune response in mucosa (GO:0002227)	2	1	0.2032	+	1
defense response to insect (GO:0002213)	2	1	0.2032	+	1
ribosomal small subunit assembly (GO:0000028)	2	2	0.2032	+	1
GDP-mannose biosynthetic process (GO:0009298)	2	1	0.2032	+	1
mitochondrion inheritance (GO:0000001)	2	1	0.2032	+	1
rRNA 3'-end processing (GO:0031125)	2	2	0.2032	+	1
rRNA pseudouridine synthesis (GO:0031118)	2	1	0.2032	+	1
negative regulation of DNA endoreduplication (GO:0032876)	2	1	0.2032	+	1
regulation of GTP cyclohydrolase I activity (GO:0043095)	2	1	0.2032	+	1
asparagine biosynthetic process (GO:0006529)	2	1	0.2032	+	1
asparagine metabolic process (GO:0006528)	2	1	0.2032	+	1
maintenance of protein localization in endoplasmic reticulum (GO:0035437)	2	2	0.2032	+	1
carnitine transport (GO:0015879)	2	1	0.2032	+	1
ribonucleoside diphosphate biosynthetic process (GO:0009188)	2	2	0.2032	+	1
deoxyribonucleoside diphosphate metabolic process (GO:0009186)	2	1	0.2032	+	1
ribonucleoside diphosphate metabolic process (GO:0009185)	2	2	0.2032	+	1
purine ribonucleoside diphosphate biosynthetic process (GO:0009180)	2	2	0.2032	+	1
amino-acid betaine transport (GO:0015838)	2	1	0.2032	+	1
purine ribonucleoside diphosphate metabolic process (GO:0009179)	2	2	0.2032	+	1
formation of translation initiation ternary complex (GO:0001677)	2	1	0.2032	+	1
mitochondrial protein processing (GO:0034982)	2	1	0.2032	+	1
purine nucleoside diphosphate biosynthetic process (GO:0009136)	2	2	0.2032	+	1
purine nucleoside diphosphate metabolic process (GO:0009135)	2	2	0.2032	+	1
lipoate biosynthetic process (GO:0009107)	2	1	0.2032	+	1
lipoate metabolic process (GO:0009106)	2	1	0.2032	+	1
N-terminal protein lipidation (GO:0006498)	2	1	0.2032	+	1
selenocysteine biosynthetic process (GO:0016260)	2	1	0.2032	+	1
selenocysteine metabolic process (GO:0016259)	2	1	0.2032	+	1
queuosine biosynthetic process (GO:0008616)	2	1	0.2032	+	1
tyrosyl-tRNA aminoacylation (GO:0006437)	2	1	0.2032	+	1
glutaminyl-tRNA aminoacylation (GO:0006425)	2	1	0.2032	+	1
aspartyl-tRNA aminoacylation (GO:0006422)	2	1	0.2032	+	1
tRNA export from nucleus (GO:0006409)	2	1	0.2032	+	1
snRNA export from nucleus (GO:0006408)	2	2	0.2032	+	1
RNA phosphodiester bond hydrolysis, endonucleolytic (GO:0090502)	2	2	0.2032	+	1
regulation of endocytic recycling (GO:2001135)	2	1	0.2032	+	1
selenocysteine incorporation (GO:0001514)	2	1	0.2032	+	1
transcription initiation from RNA polymerase III promoter (GO:0006384)	2	1	0.2032	+	1
protein import into mitochondrial inner membrane (GO:0045039)	2	1	0.2032	+	1
quaternary ammonium group transport (GO:0015697)	2	1	0.2032	+	1
histone H4-K20 trimethylation (GO:0034773)	2	1	0.2032	+	1
positive regulation of ion transmembrane transport (GO:0034767)	2	1	0.2032	+	1
positive regulation of transmembrane transport (GO:0034764)	2	1	0.2032	+	1
positive regulation of iron ion transmembrane transport (GO:0034761)	2	1	0.2032	+	1
regulation of iron ion transmembrane transport (GO:0034759)	2	1	0.2032	+	1
positive regulation of iron ion transport (GO:0034758)	2	1	0.2032	+	1
regulation of iron ion transport (GO:0034756)	2	1	0.2032	+	1
'de novo' GDP-L-fucose biosynthetic process (GO:0042351)	2	2	0.2032	+	1
GDP-L-fucose biosynthetic process (GO:0042350)	2	2	0.2032	+	1
protein-FAD linkage (GO:0018293)	2	1	0.2032	+	1
nucleotide-excision repair, DNA incision, 5'-to lesion (GO:0006296)	2	1	0.2032	+	1
leading strand elongation (GO:0006272)	2	1	0.2032	+	1
DNA unwinding involved in DNA replication (GO:0006268)	2	1	0.2032	+	1
SMT3-dependent protein catabolic process (GO:0019950)	2	2	0.2032	+	1
regulation of cell cycle checkpoint (GO:1901976)	2	2	0.2032	+	1
zymogen inhibition (GO:0097341)	2	1	0.2032	+	1
inhibition of cysteine-type endopeptidase activity (GO:0097340)	2	1	0.2032	+	1
response to peptidoglycan (GO:0032494)	2	1	0.2032	+	1
Rap protein signal transduction (GO:0032486)	2	1	0.2032	+	1
peptidyl-cysteine modification (GO:0018198)	2	1	0.2032	+	1
skeletal muscle thin filament assembly (GO:0030240)	2	1	0.2032	+	1
positive regulation of apoptotic cell clearance (GO:2000427)	2	1	0.2032	+	1
regulation of apoptotic cell clearance (GO:2000425)	2	1	0.2032	+	1
ADP biosynthetic process (GO:0006172)	2	2	0.2032	+	1
succinate metabolic process (GO:0006105)	2	1	0.2032	+	1
regulation of spindle checkpoint (GO:0090231)	2	2	0.2032	+	1
positive regulation of chromatin silencing at telomere (GO:0031940)	2	1	0.2032	+	1
regulation of chromatin silencing at telomere (GO:0031938)	2	1	0.2032	+	1
female pronucleus assembly (GO:0035038)	2	1	0.2032	+	1
positive regulation of viral entry into host cell (GO:0046598)	2	1	0.2032	+	1
regulation of viral entry into host cell (GO:0046596)	2	1	0.2032	+	1
water homeostasis (GO:0030104)	2	1	0.2032	+	1
negative regulation of ubiquitin-protein transferase activity (GO:0051444)	2	1	0.2032	+	1
regulation of ubiquitin-protein ligase activity involved in mitotic cell cycle (GO:0051439)	2	1	0.2032	+	1
negative regulation of ubiquitin-protein ligase activity involved in mitotic cell cycle (GO:0051436)	2	1	0.2032	+	1
regulation of spindle assembly (GO:0090169)	2	2	0.2032	+	1
establishment of protein localization to mitochondrial membrane (GO:0090151)	2	1	0.2032	+	1
cytoskeleton-dependent cytoplasmic transport, nurse cell to oocyte (GO:0019749)	2	1	0.2032	+	1
negative regulation of ligase activity (GO:0051352)	2	1	0.2032	+	1
regulation of spindle assembly involved in mitosis (GO:1901673)	2	2	0.2032	+	1
GDP-L-fucose metabolic process (GO:0046368)	2	2	0.2032	+	1
positive regulation of viral process (GO:0048524)	2	1	0.2032	+	1
mitochondrial respiratory chain complex I biogenesis (GO:0097031)	2	2	0.2032	+	1
positive regulation of DNA-templated transcription, initiation (GO:2000144)	2	1	0.2032	+	1
histone H3-K4 trimethylation (GO:0080182)	2	1	0.2032	+	1
negative regulation of mitotic anaphase-promoting complex activity (GO:0060564)	2	1	0.2032	+	1
positive regulation of phagocytosis (GO:0050766)	2	1	0.2032	+	1
negative regulation of chromatin assembly or disassembly (GO:0045798)	2	1	0.2032	+	1
NADH dehydrogenase complex assembly (GO:0010257)	2	2	0.2032	+	1
endonucleolytic cleavage of tricistronic rRNA transcript (SSU-rRNA, 5.8S rRNA, LSU-rRNA) (GO:0000479)	2	2	0.2032	+	1
endonucleolytic cleavage involved in rRNA processing (GO:0000478)	2	2	0.2032	+	1
cleavage involved in rRNA processing (GO:0000469)	2	2	0.2032	+	1
maturation of 5.8S rRNA from tricistronic rRNA transcript (SSU-rRNA, 5.8S rRNA, LSU-rRNA) (GO:0000466)	2	2	0.2032	+	1
endonucleolytic cleavage to generate mature 3'-end of SSU-rRNA from (SSU-rRNA, 5.8S rRNA, LSU-rRNA) (GO:0000461)	2	2	0.2032	+	1
maturation of 5.8S rRNA (GO:0000460)	2	2	0.2032	+	1
endonucleolytic cleavage in ITS1 to separate SSU-rRNA from 5.8S rRNA and LSU-rRNA from tricistronic rRNA transcript (SSU-rRNA, 5.8S rRNA, LSU-rRNA) (GO:0000447)	2	2	0.2032	+	1
proton-transporting ATP synthase complex biogenesis (GO:0070272)	2	2	0.2032	+	1
haltere disc morphogenesis (GO:0007481)	2	1	0.2032	+	1
negative regulation of epithelial cell proliferation (GO:0050680)	2	1	0.2032	+	1
shoot system development (GO:0048367)	2	2	0.2032	+	1
response to insect (GO:0009625)	2	1	0.2032	+	1
glycerol-3-phosphate biosynthetic process (GO:0046167)	2	1	0.2032	+	1
muscle tissue morphogenesis (GO:0060415)	2	1	0.2032	+	1
organelle inheritance (GO:0048308)	2	1	0.2032	+	1
queuosine metabolic process (GO:0046116)	2	1	0.2032	+	1
positive regulation of NF-kappaB transcription factor activity (GO:0051092)	2	2	0.2032	+	1
chaperone mediated protein folding requiring cofactor (GO:0051085)	2	1	0.2032	+	1
'de novo' posttranslational protein folding (GO:0051084)	2	1	0.2032	+	1
proton-transporting ATP synthase complex assembly (GO:0043461)	2	2	0.2032	+	1
nucleotide-excision repair, DNA incision (GO:0033683)	2	1	0.2032	+	1
tRNA transport (GO:0051031)	2	1	0.2032	+	1
snRNA transport (GO:0051030)	2	2	0.2032	+	1
negative regulation of heterochromatin assembly (GO:0031452)	2	1	0.2032	+	1
UMP metabolic process (GO:0046049)	3	1	0.3048	+	1
multivesicular body organization (GO:0036257)	3	1	0.3048	+	1
Golgi to plasma membrane transport (GO:0006893)	3	1	0.3048	+	1
regulation of protein binding (GO:0043393)	3	1	0.3048	+	1
immune response-regulating cell surface receptor signaling pathway involved in phagocytosis (GO:0002433)	3	1	0.3048	+	1
negative regulation of RNA polymerase II transcriptional preinitiation complex assembly (GO:0017055)	3	1	0.3048	+	1
peroxisome fission (GO:0016559)	3	1	0.3048	+	1
detoxification of arsenic-containing substance (GO:0071722)	3	1	0.3048	+	1
proteasome assembly (GO:0043248)	3	1	0.3048	+	1
signal maturation (GO:0035638)	3	1	0.3048	+	1
juvenile hormone mediated signaling pathway (GO:0035626)	3	1	0.3048	+	1
regulation of chromatin binding (GO:0035561)	3	1	0.3048	+	1
protein import into nucleus, docking (GO:0000059)	3	1	0.3048	+	1
regulation of polysaccharide metabolic process (GO:0032881)	3	1	0.3048	+	1
ectodermal cell fate commitment (GO:0001712)	3	1	0.3048	+	1
inner mitochondrial membrane organization (GO:0007007)	3	1	0.3048	+	1
ectoderm formation (GO:0001705)	3	1	0.3048	+	1
purine ribonucleoside monophosphate catabolic process (GO:0009169)	3	2	0.3048	+	1
nucleoside diphosphate biosynthetic process (GO:0009133)	3	2	0.3048	+	1
histone arginine methylation (GO:0034969)	3	2	0.3048	+	1
purine nucleoside monophosphate catabolic process (GO:0009128)	3	2	0.3048	+	1
translational readthrough (GO:0006451)	3	1	0.3048	+	1
regulation of translational elongation (GO:0006448)	3	3	0.3048	+	1
peptidyl-lysine modification to peptidyl-hypusine (GO:0008612)	3	2	0.3048	+	1
seryl-tRNA aminoacylation (GO:0006434)	3	2	0.3048	+	1
rRNA export from nucleus (GO:0006407)	3	2	0.3048	+	1
RNA phosphodiester bond hydrolysis (GO:0090501)	3	2	0.3048	+	1
negative regulation of transcription regulatory region DNA binding (GO:2000678)	3	1	0.3048	+	1
regulation of transcription regulatory region DNA binding (GO:2000677)	3	1	0.3048	+	1
visual learning (GO:0008542)	3	1	0.3048	+	1
regulation of glycogen metabolic process (GO:0070873)	3	1	0.3048	+	1
peptidyl-arginine omega-N-methylation (GO:0035247)	3	1	0.3048	+	1
peptidyl-arginine N-methylation (GO:0035246)	3	1	0.3048	+	1
histone H4-K20 methylation (GO:0034770)	3	1	0.3048	+	1
regulation of multivesicular body size (GO:0010796)	3	1	0.3048	+	1
negative regulation of phosphoprotein phosphatase activity (GO:0032515)	3	1	0.3048	+	1
endosome to lysosome transport via multivesicular body sorting pathway (GO:0032510)	3	1	0.3048	+	1
peptidyl-arginine methylation (GO:0018216)	3	1	0.3048	+	1
peptidyl-histidine modification (GO:0018202)	3	1	0.3048	+	1
nuclear axial expansion (GO:0035191)	3	1	0.3048	+	1
UMP biosynthetic process (GO:0006222)	3	1	0.3048	+	1
ATP catabolic process (GO:0006200)	3	2	0.3048	+	1
fusion cell fate specification (GO:0035156)	3	1	0.3048	+	1
terminal cell fate specification, open tracheal system (GO:0035154)	3	1	0.3048	+	1
peptidyl-arginine methylation, to asymmetrical-dimethyl arginine (GO:0019919)	3	1	0.3048	+	1
peptidyl-arginine modification (GO:0018195)	3	1	0.3048	+	1
ectodermal cell differentiation (GO:0010668)	3	1	0.3048	+	1
positive regulation of histone H3-K9 methylation (GO:0051574)	3	1	0.3048	+	1
regulation of histone H3-K9 methylation (GO:0051570)	3	1	0.3048	+	1
mitochondrial electron transport, succinate to ubiquinone (GO:0006121)	3	1	0.3048	+	1
maintenance of pole plasm mRNA location (GO:0046594)	3	1	0.3048	+	1
negative regulation of melanization defense response (GO:0035009)	3	1	0.3048	+	1
protein polyglycylation (GO:0018094)	3	1	0.3048	+	1
centromere complex assembly (GO:0034508)	3	1	0.3048	+	1
protein-cofactor linkage (GO:0018065)	3	1	0.3048	+	1
lipid particle transport along microtubule (GO:0031887)	3	1	0.3048	+	1
regulation of dopamine metabolic process (GO:0042053)	3	1	0.3048	+	1
kinetochore assembly (GO:0051382)	3	1	0.3048	+	1
centriole-centriole cohesion (GO:0010457)	3	2	0.3048	+	1
positive regulation of ligase activity (GO:0051351)	3	1	0.3048	+	1
positive regulation of ribosome biogenesis (GO:0090070)	3	2	0.3048	+	1
regulation of ribosome biogenesis (GO:0090069)	3	2	0.3048	+	1
metaphase (GO:0051323)	3	1	0.3048	+	1
GDP-mannose metabolic process (GO:0019673)	3	2	0.3048	+	1
protein localization to plasma membrane (GO:0072659)	3	1	0.3048	+	1
regulation of calcium-mediated signaling (GO:0050848)	3	1	0.3048	+	1
regulation of RNA polymerase II transcriptional preinitiation complex assembly (GO:0045898)	3	1	0.3048	+	1
negative regulation of DNA-dependent DNA replication (GO:2000104)	3	2	0.3048	+	1
protein insertion into membrane (GO:0051205)	3	1	0.3048	+	1
regulation of phagocytosis (GO:0050764)	3	1	0.3048	+	1
regulation of DNA methylation (GO:0044030)	3	1	0.3048	+	1
DNA hypermethylation (GO:0044026)	3	1	0.3048	+	1
regulation of stem cell division (GO:2000035)	3	1	0.3048	+	1
negative regulation of Toll signaling pathway (GO:0045751)	3	1	0.3048	+	1
intra-S DNA damage checkpoint (GO:0031573)	3	1	0.3048	+	1
regulation of epithelial cell proliferation (GO:0050678)	3	1	0.3048	+	1
polyol biosynthetic process (GO:0046173)	3	1	0.3048	+	1
smooth muscle contraction (GO:0006939)	3	1	0.3048	+	1
protein deneddylation (GO:0000338)	3	1	0.3048	+	1
microtubule sliding (GO:0051012)	3	1	0.3048	+	1
regulation of lipoprotein lipase activity (GO:0051004)	3	1	0.3048	+	1
peptidyl-diphthamide biosynthetic process from peptidyl-histidine (GO:0017183)	3	1	0.3048	+	1
peptidyl-diphthamide metabolic process (GO:0017182)	3	1	0.3048	+	1
specification of segmental identity, antennal segment (GO:0007383)	3	1	0.3048	+	1
plasma membrane to endosome transport (GO:0048227)	4	1	0.4063	+	1
endosomal vesicle fusion (GO:0034058)	4	1	0.4063	+	1
specification of organ identity (GO:0010092)	4	1	0.4063	+	1
negative regulation of DNA binding (GO:0043392)	4	2	0.4063	+	1
negative regulation of protein ubiquitination (GO:0031397)	4	1	0.4063	+	1
N-terminal protein amino acid modification (GO:0031365)	4	1	0.4063	+	1
formation of a compartment boundary (GO:0060288)	4	1	0.4063	+	1
tetrahydrobiopterin biosynthetic process (GO:0006729)	4	1	0.4063	+	1
positive regulation of ion transport (GO:0043270)	4	1	0.4063	+	1
positive regulation of protein complex disassembly (GO:0043243)	4	1	0.4063	+	1
snRNA transcription from RNA polymerase III promoter (GO:0042796)	4	1	0.4063	+	1
rRNA transcription (GO:0009303)	4	1	0.4063	+	1
negative regulation of mRNA splicing, via spliceosome (GO:0048025)	4	1	0.4063	+	1
secretory granule organization (GO:0033363)	4	1	0.4063	+	1
spindle assembly involved in female meiosis I (GO:0007057)	4	1	0.4063	+	1
pyrimidine ribonucleoside triphosphate biosynthetic process (GO:0009209)	4	1	0.4063	+	1
tubulin complex assembly (GO:0007021)	4	1	0.4063	+	1
cholesterol homeostasis (GO:0042632)	4	1	0.4063	+	1
inositol phosphate catabolic process (GO:0071545)	4	1	0.4063	+	1
proline biosynthetic process (GO:0006561)	4	1	0.4063	+	1
mRNA cis splicing, via spliceosome (GO:0045292)	4	1	0.4063	+	1
cytoplasmic translation (GO:0002181)	4	2	0.4063	+	1
regulation of cellular amine metabolic process (GO:0033238)	4	1	0.4063	+	1
pyrimidine ribonucleoside monophosphate biosynthetic process (GO:0009174)	4	1	0.4063	+	1
pyrimidine ribonucleoside monophosphate metabolic process (GO:0009173)	4	1	0.4063	+	1
ribonucleoside monophosphate catabolic process (GO:0009158)	4	2	0.4063	+	1
pyrimidine nucleoside triphosphate biosynthetic process (GO:0009148)	4	1	0.4063	+	1
nucleoside monophosphate catabolic process (GO:0009125)	4	2	0.4063	+	1
N-glycan processing (GO:0006491)	4	1	0.4063	+	1
maintenance of epithelial cell apical/basal polarity (GO:0045199)	4	1	0.4063	+	1
tRNA wobble uridine modification (GO:0002098)	4	1	0.4063	+	1
tRNA wobble base modification (GO:0002097)	4	1	0.4063	+	1
regulation of glucose metabolic process (GO:0010906)	4	1	0.4063	+	1
protein neddylation (GO:0045116)	4	3	0.4063	+	1
mitochondrial respiratory chain complex assembly (GO:0033108)	4	2	0.4063	+	1
inositol phosphate dephosphorylation (GO:0046855)	4	1	0.4063	+	1
micropyle formation (GO:0046844)	4	1	0.4063	+	1
phosphorylated carbohydrate dephosphorylation (GO:0046838)	4	1	0.4063	+	1
fatty acid alpha-oxidation (GO:0001561)	4	1	0.4063	+	1
maturation of SSU-rRNA (GO:0030490)	4	3	0.4063	+	1
negative regulation of viral genome replication (GO:0045071)	4	1	0.4063	+	1
regulation of viral genome replication (GO:0045069)	4	1	0.4063	+	1
brain segmentation (GO:0035284)	4	1	0.4063	+	1
central nervous system segmentation (GO:0035283)	4	1	0.4063	+	1
DNA modification (GO:0006304)	4	1	0.4063	+	1
early endosome to late endosome transport (GO:0045022)	4	1	0.4063	+	1
negative regulation of lamellocyte differentiation (GO:0035204)	4	1	0.4063	+	1
DNA duplex unwinding (GO:0032508)	4	1	0.4063	+	1
cellular response to amino acid stimulus (GO:0071230)	4	2	0.4063	+	1
CTP biosynthetic process (GO:0006241)	4	1	0.4063	+	1
UTP biosynthetic process (GO:0006228)	4	1	0.4063	+	1
dendritic spine morphogenesis (GO:0060997)	4	1	0.4063	+	1
dendritic spine development (GO:0060996)	4	1	0.4063	+	1
ribosomal large subunit biogenesis (GO:0042273)	4	3	0.4063	+	1
positive regulation of locomotion (GO:0040017)	4	1	0.4063	+	1
GTP biosynthetic process (GO:0006183)	4	1	0.4063	+	1
negative regulation of antimicrobial humoral response (GO:0008348)	4	1	0.4063	+	1
axon transport of mitochondrion (GO:0019896)	4	1	0.4063	+	1
DNA geometric change (GO:0032392)	4	1	0.4063	+	1
protein import into mitochondrial matrix (GO:0030150)	4	1	0.4063	+	1
peptidyl-lysine trimethylation (GO:0018023)	4	2	0.4063	+	1
regulation of catecholamine metabolic process (GO:0042069)	4	1	0.4063	+	1
microtubule anchoring at centrosome (GO:0034454)	4	1	0.4063	+	1
cytoplasmic mRNA processing body assembly (GO:0033962)	4	3	0.4063	+	1
tubulin complex biogenesis (GO:0072668)	4	1	0.4063	+	1
pollen-pistil interaction (GO:0009875)	4	3	0.4063	+	1
pollination (GO:0009856)	4	3	0.4063	+	1
regulation of ER to Golgi vesicle-mediated transport (GO:0060628)	4	1	0.4063	+	1
recognition of pollen (GO:0048544)	4	3	0.4063	+	1
negative regulation of viral process (GO:0048525)	4	1	0.4063	+	1
negative regulation of cysteine-type endopeptidase activity (GO:2000117)	4	1	0.4063	+	1
immune response-regulating signaling pathway (GO:0002764)	4	2	0.4063	+	1
innate immune response-activating signal transduction (GO:0002758)	4	2	0.4063	+	1
immune response-activating signal transduction (GO:0002757)	4	2	0.4063	+	1
maintenance of RNA location (GO:0051237)	4	1	0.4063	+	1
maintenance of protein localization in organelle (GO:0072595)	4	2	0.4063	+	1
outflow tract morphogenesis (GO:0003151)	4	1	0.4063	+	1
tRNA thio-modification (GO:0034227)	4	1	0.4063	+	1
positive regulation of chromatin assembly or disassembly (GO:0045799)	4	1	0.4063	+	1
positive regulation of G-protein coupled receptor protein signaling pathway (GO:0045745)	4	1	0.4063	+	1
maturation of SSU-rRNA from tricistronic rRNA transcript (SSU-rRNA, 5.8S rRNA, LSU-rRNA) (GO:0000462)	4	3	0.4063	+	1
tetrahydrobiopterin metabolic process (GO:0046146)	4	1	0.4063	+	1
pyrimidine nucleoside catabolic process (GO:0046135)	4	1	0.4063	+	1
pyrimidine ribonucleoside catabolic process (GO:0046133)	4	1	0.4063	+	1
cellular response to virus (GO:0098586)	4	2	0.4063	+	1
regulation of generation of precursor metabolites and energy (GO:0043467)	4	1	0.4063	+	1
negative regulation of plasmatocyte differentiation (GO:0045614)	4	1	0.4063	+	1
negative regulation of sequence-specific DNA binding transcription factor activity (GO:0043433)	4	1	0.4063	+	1
microtubule anchoring at microtubule organizing center (GO:0072393)	4	1	0.4063	+	1
rRNA transport (GO:0051029)	4	2	0.4063	+	1
positive regulation of heterochromatin assembly (GO:0031453)	4	1	0.4063	+	1
cytoplasmic sequestering of transcription factor (GO:0042994)	4	1	0.4063	+	1
negative regulation of transcription factor import into nucleus (GO:0042992)	4	1	0.4063	+	1
acceptance of pollen (GO:0060321)	4	3	0.4063	+	1
CTP metabolic process (GO:0046036)	5	2	0.5079	+	1
purine nucleoside bisphosphate biosynthetic process (GO:0034033)	5	2	0.5079	+	1
ribonucleoside bisphosphate biosynthetic process (GO:0034030)	5	2	0.5079	+	1
cellular copper ion homeostasis (GO:0006878)	5	1	0.5079	+	1
primary spermatocyte growth (GO:0007285)	5	1	0.5079	+	1
spermatogonial cell division (GO:0007284)	5	1	0.5079	+	1
regulation of transcription initiation from RNA polymerase II promoter (GO:0060260)	5	2	0.5079	+	1
protein import into peroxisome matrix (GO:0016558)	5	1	0.5079	+	1
regulation of R8 cell spacing in compound eye (GO:0045468)	5	1	0.5079	+	1
response to amino acid (GO:0043200)	5	2	0.5079	+	1
2'-deoxyribonucleotide metabolic process (GO:0009394)	5	2	0.5079	+	1
regulation of lipase activity (GO:0060191)	5	1	0.5079	+	1
snRNA transcription from RNA polymerase II promoter (GO:0042795)	5	1	0.5079	+	1
adult chitin-containing cuticle pigmentation (GO:0048085)	5	1	0.5079	+	1
regulation of compound eye pigmentation (GO:0048076)	5	1	0.5079	+	1
regulation of eye pigmentation (GO:0048073)	5	1	0.5079	+	1
positive regulation of posttranscriptional gene silencing (GO:0060148)	5	1	0.5079	+	1
regulation of posttranscriptional gene silencing (GO:0060147)	5	1	0.5079	+	1
negative regulation of protein modification by small protein conjugation or removal (GO:1903321)	5	1	0.5079	+	1
mitotic centrosome separation (GO:0007100)	5	1	0.5079	+	1
sequestering of triglyceride (GO:0030730)	5	1	0.5079	+	1
sphingomyelin metabolic process (GO:0006684)	5	1	0.5079	+	1
mitotic M phase (GO:0000087)	5	3	0.5079	+	1
response to molecule of bacterial origin (GO:0002237)	5	1	0.5079	+	1
very long-chain fatty acid metabolic process (GO:0000038)	5	1	0.5079	+	1
female germ-line sex determination (GO:0019099)	5	1	0.5079	+	1
coenzyme A biosynthetic process (GO:0015937)	5	2	0.5079	+	1
Wnt signaling pathway, planar cell polarity pathway (GO:0060071)	5	1	0.5079	+	1
male meiosis sister chromatid cohesion (GO:0007065)	5	1	0.5079	+	1
pyrimidine deoxyribonucleotide metabolic process (GO:0009219)	5	2	0.5079	+	1
regulation of DNA endoreduplication (GO:0032875)	5	1	0.5079	+	1
pyrimidine ribonucleoside triphosphate metabolic process (GO:0009208)	5	2	0.5079	+	1
nucleolus organization (GO:0007000)	5	1	0.5079	+	1
sterol homeostasis (GO:0055092)	5	1	0.5079	+	1
establishment or maintenance of polarity of larval imaginal disc epithelium (GO:0016336)	5	1	0.5079	+	1
positive regulation of histone methylation (GO:0031062)	5	1	0.5079	+	1
pyrimidine nucleoside monophosphate biosynthetic process (GO:0009130)	5	1	0.5079	+	1
pyrimidine nucleoside monophosphate metabolic process (GO:0009129)	5	1	0.5079	+	1
Cajal body organization (GO:0030576)	5	1	0.5079	+	1
cellular response to superoxide (GO:0071451)	5	1	0.5079	+	1
cellular response to oxygen radical (GO:0071450)	5	1	0.5079	+	1
negative regulation of macroautophagy (GO:0016242)	5	1	0.5079	+	1
negative regulation of protein dephosphorylation (GO:0035308)	5	1	0.5079	+	1
negative regulation of dephosphorylation (GO:0035305)	5	1	0.5079	+	1
negative regulation of proteolysis involved in cellular protein catabolic process (GO:1903051)	5	2	0.5079	+	1
positive regulation of gene silencing by miRNA (GO:2000637)	5	1	0.5079	+	1
regulation of centrosome duplication (GO:0010824)	5	1	0.5079	+	1
regulation of protein exit from endoplasmic reticulum (GO:0070861)	5	1	0.5079	+	1
regulation of lamellocyte differentiation (GO:0035203)	5	1	0.5079	+	1
mitochondrial DNA replication (GO:0006264)	5	2	0.5079	+	1
regulation of gene silencing by miRNA (GO:0060964)	5	1	0.5079	+	1
negative regulation of proteasomal ubiquitin-dependent protein catabolic process (GO:0032435)	5	2	0.5079	+	1
nucleoside diphosphate phosphorylation (GO:0006165)	5	1	0.5079	+	1
female germline ring canal stabilization (GO:0008335)	5	1	0.5079	+	1
cell elongation involved in imaginal disc-derived wing morphogenesis (GO:0090254)	5	1	0.5079	+	1
positive regulation of multi-organism process (GO:0043902)	5	1	0.5079	+	1
regulation of transcription of nuclear large rRNA transcript from RNA polymerase I promoter (GO:1901836)	5	1	0.5079	+	1
negative regulation of protein catabolic process (GO:0042177)	5	2	0.5079	+	1
peptidyl-lysine methylation (GO:0018022)	5	2	0.5079	+	1
negative regulation of humoral immune response (GO:0002921)	5	1	0.5079	+	1
negative regulation of proteasomal protein catabolic process (GO:1901799)	5	2	0.5079	+	1
actin filament depolymerization (GO:0030042)	5	1	0.5079	+	1
actin filament polymerization (GO:0030041)	5	1	0.5079	+	1
deoxyribose phosphate metabolic process (GO:0019692)	5	2	0.5079	+	1
mitotic sister chromatid separation (GO:0051306)	5	1	0.5079	+	1
dendritic spine organization (GO:0097061)	5	1	0.5079	+	1
monosaccharide biosynthetic process (GO:0046364)	5	1	0.5079	+	1
regulation of DNA-templated transcription, initiation (GO:2000142)	5	2	0.5079	+	1
negative regulation of response to nutrient levels (GO:0032108)	5	1	0.5079	+	1
negative regulation of response to extracellular stimulus (GO:0032105)	5	1	0.5079	+	1
nucleoside bisphosphate biosynthetic process (GO:0033866)	5	2	0.5079	+	1
cytoplasmic sequestering of protein (GO:0051220)	5	1	0.5079	+	1
clathrin-mediated endocytosis (GO:0072583)	5	1	0.5079	+	1
regulation of eclosion (GO:0007563)	5	1	0.5079	+	1
muscle cell fate determination (GO:0007521)	5	1	0.5079	+	1
digestive tract mesoderm development (GO:0007502)	5	1	0.5079	+	1
mitochondrial DNA metabolic process (GO:0032042)	5	2	0.5079	+	1
negative regulation of binding (GO:0051100)	5	3	0.5079	+	1
removal of superoxide radicals (GO:0019430)	5	1	0.5079	+	1
polyol catabolic process (GO:0046174)	5	1	0.5079	+	1
spliceosomal snRNP assembly (GO:0000387)	5	3	0.5079	+	1
regulation of plasmatocyte differentiation (GO:0045613)	5	1	0.5079	+	1
response to oxygen radical (GO:0000305)	5	1	0.5079	+	1
response to superoxide (GO:0000303)	5	1	0.5079	+	1
regulation of Golgi to plasma membrane protein transport (GO:0042996)	5	1	0.5079	+	1
hexose biosynthetic process (GO:0019319)	5	1	0.5079	+	1
regulation of syncytial blastoderm mitotic cell cycle (GO:0007348)	5	1	0.5079	+	1
UTP metabolic process (GO:0046051)	5	2	0.5079	+	1
superoxide metabolic process (GO:0006801)	6	1	0.6095	+	1
ubiquinone biosynthetic process (GO:0006744)	6	1	0.6095	+	1
ubiquinone metabolic process (GO:0006743)	6	1	0.6095	+	1
specification of axis polarity (GO:0065001)	6	1	0.6095	+	1
female somatic sex determination (GO:0019101)	6	2	0.6095	+	1
hydrogen peroxide catabolic process (GO:0042744)	6	2	0.6095	+	1
hydrogen peroxide metabolic process (GO:0042743)	6	2	0.6095	+	1
negative regulation of mRNA metabolic process (GO:1903312)	6	1	0.6095	+	1
snRNA transcription (GO:0009301)	6	1	0.6095	+	1
SRP-dependent cotranslational protein targeting to membrane, translocation (GO:0006616)	6	4	0.6095	+	1
mitotic spindle stabilization (GO:0043148)	6	1	0.6095	+	1
autophagic vacuole assembly (GO:0000045)	6	1	0.6095	+	1
coenzyme A metabolic process (GO:0015936)	6	2	0.6095	+	1
deoxyribonucleotide metabolic process (GO:0009262)	6	2	0.6095	+	1
guanosine-containing compound biosynthetic process (GO:1901070)	6	1	0.6095	+	1
nucleotide-sugar biosynthetic process (GO:0009226)	6	3	0.6095	+	1
mitochondrial membrane organization (GO:0007006)	6	2	0.6095	+	1
distributive segregation (GO:0032837)	6	1	0.6095	+	1
regulation of apoptotic signaling pathway (GO:2001233)	6	1	0.6095	+	1
meiotic cell cycle phase transition (GO:0044771)	6	1	0.6095	+	1
behavioral response to starvation (GO:0042595)	6	1	0.6095	+	1
pyrimidine nucleoside triphosphate metabolic process (GO:0009147)	6	3	0.6095	+	1
nucleotide phosphorylation (GO:0046939)	6	2	0.6095	+	1
nuclear body organization (GO:0030575)	6	1	0.6095	+	1
signal peptide processing (GO:0006465)	6	3	0.6095	+	1
negative regulation of phosphatase activity (GO:0010923)	6	1	0.6095	+	1
attachment of spindle microtubules to kinetochore (GO:0008608)	6	1	0.6095	+	1
translational termination (GO:0006415)	6	3	0.6095	+	1
meiotic sister chromatid segregation (GO:0045144)	6	1	0.6095	+	1
regulation of protein localization to plasma membrane (GO:1903076)	6	1	0.6095	+	1
single-organism membrane budding (GO:1902591)	6	1	0.6095	+	1
transcription from mitochondrial promoter (GO:0006390)	6	1	0.6095	+	1
transcription from RNA polymerase I promoter (GO:0006360)	6	3	0.6095	+	1
negative regulation of hemocyte proliferation (GO:0035207)	6	1	0.6095	+	1
positive regulation of retrograde axon cargo transport (GO:2001019)	6	2	0.6095	+	1
regulation of retrograde axon cargo transport (GO:2001017)	6	2	0.6095	+	1
peptidyl-serine modification (GO:0018209)	6	1	0.6095	+	1
syncytial nuclear migration (GO:0035190)	6	1	0.6095	+	1
'de novo' pyrimidine nucleobase biosynthetic process (GO:0006207)	6	1	0.6095	+	1
regulation of DNA-dependent DNA replication (GO:0090329)	6	2	0.6095	+	1
'de novo' IMP biosynthetic process (GO:0006189)	6	1	0.6095	+	1
histone H3-K9 methylation (GO:0051567)	6	2	0.6095	+	1
peptidyl-serine phosphorylation (GO:0018105)	6	1	0.6095	+	1
meiotic G2/MI transition (GO:0008315)	6	1	0.6095	+	1
pyrimidine nucleobase biosynthetic process (GO:0019856)	6	1	0.6095	+	1
regulation of ubiquitin-protein transferase activity (GO:0051438)	6	2	0.6095	+	1
positive regulation of mitochondrial fission (GO:0090141)	6	2	0.6095	+	1
regulation of mitochondrial fission (GO:0090140)	6	2	0.6095	+	1
mitochondrion morphogenesis (GO:0070584)	6	1	0.6095	+	1
polarity specification of dorsal/ventral axis (GO:0009951)	6	1	0.6095	+	1
central nervous system projection neuron axonogenesis (GO:0021952)	6	1	0.6095	+	1
regulation of establishment of protein localization to plasma membrane (GO:0090003)	6	1	0.6095	+	1
poly(A)+ mRNA export from nucleus (GO:0016973)	6	2	0.6095	+	1
protein desumoylation (GO:0016926)	6	1	0.6095	+	1
chaperone-mediated protein folding (GO:0061077)	6	1	0.6095	+	1
regulation of phosphoprotein phosphatase activity (GO:0043666)	6	1	0.6095	+	1
positive regulation of heart contraction (GO:0045823)	6	2	0.6095	+	1
regulation of viral process (GO:0050792)	6	2	0.6095	+	1
primary sex determination, germ-line (GO:0007542)	6	1	0.6095	+	1
sex determination, primary response to X:A ratio (GO:0007541)	6	2	0.6095	+	1
cellular response to hydrogen peroxide (GO:0070301)	6	2	0.6095	+	1
meiotic sister chromatid cohesion (GO:0051177)	6	1	0.6095	+	1
heterochromatin assembly (GO:0031507)	6	1	0.6095	+	1
negative regulation of mRNA processing (GO:0050686)	6	1	0.6095	+	1
determination of digestive tract left/right asymmetry (GO:0071907)	6	1	0.6095	+	1
regulation of endosome size (GO:0051036)	6	1	0.6095	+	1
zygotic specification of dorsal/ventral axis (GO:0007352)	6	1	0.6095	+	1
IMP metabolic process (GO:0046040)	7	1	0.7111	+	1
purine nucleoside bisphosphate metabolic process (GO:0034032)	7	2	0.7111	+	1
heme biosynthetic process (GO:0006783)	7	3	0.7111	+	1
porphyrin-containing compound biosynthetic process (GO:0006779)	7	3	0.7111	+	1
folic acid-containing compound metabolic process (GO:0006760)	7	1	0.7111	+	1
rRNA modification (GO:0000154)	7	2	0.7111	+	1
female meiosis I (GO:0007144)	7	1	0.7111	+	1
negative regulation of chromatin modification (GO:1903309)	7	1	0.7111	+	1
protein targeting to peroxisome (GO:0006625)	7	2	0.7111	+	1
positive regulation of cell cycle G1/S phase transition (GO:1902808)	7	2	0.7111	+	1
non-canonical Wnt signaling pathway (GO:0035567)	7	1	0.7111	+	1
activation of innate immune response (GO:0002218)	7	2	0.7111	+	1
amino acid salvage (GO:0043102)	7	1	0.7111	+	1
nucleotide-sugar metabolic process (GO:0009225)	7	3	0.7111	+	1
regulation of homeostatic process (GO:0032844)	7	1	0.7111	+	1
proline metabolic process (GO:0006560)	7	1	0.7111	+	1
positive regulation of lamellipodium organization (GO:1902745)	7	1	0.7111	+	1
paracrine signaling (GO:0038001)	7	1	0.7111	+	1
lamellipodium organization (GO:0097581)	7	1	0.7111	+	1
negative regulation of RNA splicing (GO:0033119)	7	1	0.7111	+	1
methionine biosynthetic process (GO:0009086)	7	1	0.7111	+	1
serine family amino acid biosynthetic process (GO:0009070)	7	2	0.7111	+	1
tRNA splicing, via endonucleolytic cleavage and ligation (GO:0006388)	7	2	0.7111	+	1
regulation of chromatin assembly (GO:0010847)	7	2	0.7111	+	1
regulation of transcription from RNA polymerase I promoter (GO:0006356)	7	1	0.7111	+	1
gonad morphogenesis (GO:0035262)	7	1	0.7111	+	1
clypeo-labral disc development (GO:0035213)	7	1	0.7111	+	1
negative regulation of protein import into nucleus (GO:0042308)	7	1	0.7111	+	1
L-methionine salvage (GO:0071267)	7	1	0.7111	+	1
L-methionine biosynthetic process (GO:0071265)	7	1	0.7111	+	1
base-excision repair (GO:0006284)	7	1	0.7111	+	1
cellular response to acid chemical (GO:0071229)	7	2	0.7111	+	1
pre-replicative complex assembly involved in nuclear cell cycle DNA replication (GO:0006267)	7	1	0.7111	+	1
mitochondrial RNA metabolic process (GO:0000959)	7	2	0.7111	+	1
regulation of cellular carbohydrate metabolic process (GO:0010675)	7	2	0.7111	+	1
positive regulation of Wnt protein secretion (GO:0061357)	7	1	0.7111	+	1
regulation of Wnt protein secretion (GO:0061356)	7	1	0.7111	+	1
IMP biosynthetic process (GO:0006188)	7	1	0.7111	+	1
maintenance of apical/basal cell polarity (GO:0035090)	7	2	0.7111	+	1
regulation of melanization defense response (GO:0035007)	7	1	0.7111	+	1
proboscis development (GO:0048728)	7	1	0.7111	+	1
piRNA metabolic process (GO:0034587)	7	1	0.7111	+	1
protein localization to chromosome (GO:0034502)	7	1	0.7111	+	1
positive regulation of lamellipodium assembly (GO:0010592)	7	1	0.7111	+	1
pre-replicative complex assembly involved in cell cycle DNA replication (GO:1902299)	7	1	0.7111	+	1
positive regulation of G1/S transition of mitotic cell cycle (GO:1900087)	7	2	0.7111	+	1
resolution of meiotic recombination intermediates (GO:0000712)	7	1	0.7111	+	1
muscle organ morphogenesis (GO:0048644)	7	1	0.7111	+	1
detection of light stimulus involved in visual perception (GO:0050908)	7	1	0.7111	+	1
cellular acyl-CoA homeostasis (GO:0042049)	7	1	0.7111	+	1
skeletal myofibril assembly (GO:0014866)	7	1	0.7111	+	1
intercellular transport (GO:0010496)	7	1	0.7111	+	1
lamellipodium assembly (GO:0030032)	7	1	0.7111	+	1
kinetochore organization (GO:0051383)	7	1	0.7111	+	1
cellular anion homeostasis (GO:0030002)	7	1	0.7111	+	1
negative regulation of response to biotic stimulus (GO:0002832)	7	1	0.7111	+	1
regulation of ligase activity (GO:0051340)	7	3	0.7111	+	1
establishment of protein localization to peroxisome (GO:0072663)	7	2	0.7111	+	1
protein localization to peroxisome (GO:0072662)	7	2	0.7111	+	1
central nervous system neuron axonogenesis (GO:0021955)	7	1	0.7111	+	1
quinone biosynthetic process (GO:1901663)	7	1	0.7111	+	1
quinone metabolic process (GO:1901661)	7	1	0.7111	+	1
lipid particle organization (GO:0034389)	7	1	0.7111	+	1
positive regulation of cellular component movement (GO:0051272)	7	2	0.7111	+	1
engulfment of apoptotic cell (GO:0043652)	7	1	0.7111	+	1
ribonucleoside bisphosphate metabolic process (GO:0033875)	7	2	0.7111	+	1
nucleoside bisphosphate metabolic process (GO:0033865)	7	2	0.7111	+	1
pyrimidine-containing compound catabolic process (GO:0072529)	7	1	0.7111	+	1
L-methionine biosynthetic process from methylthioadenosine (GO:0019509)	7	1	0.7111	+	1
cofactor transport (GO:0051181)	7	1	0.7111	+	1
peroxisomal transport (GO:0043574)	7	2	0.7111	+	1
epithelial cell fate determination, open tracheal system (GO:0007425)	7	1	0.7111	+	1
pre-replicative complex assembly (GO:0036388)	7	1	0.7111	+	1
germ-line sex determination (GO:0018992)	7	1	0.7111	+	1
pyrimidine nucleoside biosynthetic process (GO:0046134)	7	2	0.7111	+	1
pyrimidine ribonucleoside biosynthetic process (GO:0046132)	7	2	0.7111	+	1
nuclear pore organization (GO:0006999)	7	1	0.7111	+	1
detection of external biotic stimulus (GO:0098581)	7	1	0.7111	+	1
microtubule severing (GO:0051013)	7	1	0.7111	+	1
regulation of heterochromatin assembly (GO:0031445)	7	2	0.7111	+	1
compartment pattern specification (GO:0007386)	7	1	0.7111	+	1
oocyte nucleus migration involved in oocyte dorsal/ventral axis specification (GO:0007312)	7	1	0.7111	+	1
positive regulation of imaginal disc growth (GO:0045572)	8	1	0.8127	+	1
nuclear-transcribed mRNA poly(A) tail shortening (GO:0000289)	8	1	0.8127	+	1
central nervous system morphogenesis (GO:0021551)	8	1	0.8127	+	1
regulation of mitotic spindle organization (GO:0060236)	8	3	0.8127	+	1
histone deubiquitination (GO:0016578)	8	2	0.8127	+	1
histone phosphorylation (GO:0016572)	8	1	0.8127	+	1
porphyrin-containing compound metabolic process (GO:0006778)	8	3	0.8127	+	1
glutathione biosynthetic process (GO:0006750)	8	2	0.8127	+	1
NADPH regeneration (GO:0006740)	8	1	0.8127	+	1
chromatin-mediated maintenance of transcription (GO:0048096)	8	1	0.8127	+	1
nucleosome mobilization (GO:0042766)	8	1	0.8127	+	1
sulfur amino acid biosynthetic process (GO:0000097)	8	1	0.8127	+	1
activation of immune response (GO:0002253)	8	2	0.8127	+	1
DNA replication checkpoint (GO:0000076)	8	1	0.8127	+	1
mitotic sister chromatid cohesion (GO:0007064)	8	1	0.8127	+	1
pyrimidine ribonucleotide biosynthetic process (GO:0009220)	8	2	0.8127	+	1
copper ion homeostasis (GO:0055070)	8	1	0.8127	+	1
glycine catabolic process (GO:0006546)	8	1	0.8127	+	1
glutamine metabolic process (GO:0006541)	8	1	0.8127	+	1
regulation of calcium ion transport (GO:0051924)	8	1	0.8127	+	1
nuclear cell cycle DNA replication (GO:0033260)	8	1	0.8127	+	1
cellular response to gamma radiation (GO:0071480)	8	1	0.8127	+	1
serine family amino acid catabolic process (GO:0009071)	8	1	0.8127	+	1
positive regulation of proteolysis involved in cellular protein catabolic process (GO:1903052)	8	2	0.8127	+	1
histone mRNA 3'-end processing (GO:0006398)	8	3	0.8127	+	1
positive regulation of mitochondrion organization (GO:0010822)	8	2	0.8127	+	1
peripheral nervous system neuron development (GO:0048935)	8	1	0.8127	+	1
peripheral nervous system neuron differentiation (GO:0048934)	8	1	0.8127	+	1
regulation of ion transmembrane transport (GO:0034765)	8	1	0.8127	+	1
regulation of transmembrane transport (GO:0034762)	8	1	0.8127	+	1
mismatch repair (GO:0006298)	8	1	0.8127	+	1
DNA strand elongation involved in DNA replication (GO:0006271)	8	2	0.8127	+	1
regulation of centrosome cycle (GO:0046605)	8	1	0.8127	+	1
positive regulation of proteasomal ubiquitin-dependent protein catabolic process (GO:0032436)	8	2	0.8127	+	1
DNA strand elongation (GO:0022616)	8	2	0.8127	+	1
chondroitin sulfate biosynthetic process (GO:0030206)	8	2	0.8127	+	1
chondroitin sulfate metabolic process (GO:0030204)	8	2	0.8127	+	1
histone mRNA metabolic process (GO:0008334)	8	3	0.8127	+	1
positive regulation of proteasomal protein catabolic process (GO:1901800)	8	2	0.8127	+	1
heme metabolic process (GO:0042168)	8	3	0.8127	+	1
regulation of reactive oxygen species metabolic process (GO:2000377)	8	2	0.8127	+	1
regulation of terminal button organization (GO:2000331)	8	1	0.8127	+	1
pentose-phosphate shunt (GO:0006098)	8	1	0.8127	+	1
protein refolding (GO:0042026)	8	1	0.8127	+	1
regulation of organelle assembly (GO:1902115)	8	2	0.8127	+	1
positive regulation of metaphase/anaphase transition of cell cycle (GO:1902101)	8	1	0.8127	+	1
meiotic chromosome separation (GO:0051307)	8	1	0.8127	+	1
central nervous system neuron development (GO:0021954)	8	1	0.8127	+	1
central nervous system neuron differentiation (GO:0021953)	8	1	0.8127	+	1
regulation of microtubule-based movement (GO:0060632)	8	2	0.8127	+	1
jump response (GO:0007630)	8	1	0.8127	+	1
negative regulation of growth of symbiont involved in interaction with host (GO:0044146)	8	2	0.8127	+	1
modulation of growth of symbiont involved in interaction with host (GO:0044144)	8	2	0.8127	+	1
negative regulation of growth of symbiont in host (GO:0044130)	8	2	0.8127	+	1
regulation of growth of symbiont in host (GO:0044126)	8	2	0.8127	+	1
negative regulation of neural precursor cell proliferation (GO:2000178)	8	1	0.8127	+	1
positive regulation of mitotic metaphase/anaphase transition (GO:0045842)	8	1	0.8127	+	1
positive regulation of mitosis (GO:0045840)	8	1	0.8127	+	1
inositol phosphate metabolic process (GO:0043647)	8	2	0.8127	+	1
chitin-based cuticle sclerotization (GO:0007593)	8	1	0.8127	+	1
imaginal disc eversion (GO:0007561)	8	2	0.8127	+	1
gonadal mesoderm development (GO:0007506)	8	1	0.8127	+	1
cold acclimation (GO:0009631)	8	4	0.8127	+	1
dorsal/ventral lineage restriction, imaginal disc (GO:0007451)	8	1	0.8127	+	1
chondroitin sulfate proteoglycan metabolic process (GO:0050654)	8	2	0.8127	+	1
chondroitin sulfate proteoglycan biosynthetic process (GO:0050650)	8	2	0.8127	+	1
negative regulation of neuroblast proliferation (GO:0007406)	8	1	0.8127	+	1
RNA splicing, via endonucleolytic cleavage and ligation (GO:0000394)	8	2	0.8127	+	1
histone exchange (GO:0043486)	8	2	0.8127	+	1
maternal specification of dorsal/ventral axis, oocyte, germ-line encoded (GO:0007311)	8	2	0.8127	+	1
retrograde vesicle-mediated transport, Golgi to ER (GO:0006890)	9	1	0.9143	+	1
cellular iron ion homeostasis (GO:0006879)	9	1	0.9143	+	1
negative regulation of imaginal disc growth (GO:0045571)	9	1	0.9143	+	1
growth of a germarium-derived egg chamber (GO:0007295)	9	1	0.9143	+	1
mucosal immune response (GO:0002385)	9	1	0.9143	+	1
nonribosomal peptide biosynthetic process (GO:0019184)	9	2	0.9143	+	1
establishment of oocyte nucleus localization involved in oocyte dorsal/ventral axis specification (GO:0030722)	9	1	0.9143	+	1
protein export from nucleus (GO:0006611)	9	1	0.9143	+	1
organ or tissue specific immune response (GO:0002251)	9	1	0.9143	+	1
NLS-bearing protein import into nucleus (GO:0006607)	9	1	0.9143	+	1
receptor metabolic process (GO:0043112)	9	1	0.9143	+	1
anaphase-promoting complex-dependent proteasomal ubiquitin-dependent protein catabolic process (GO:0031145)	9	1	0.9143	+	1
mitochondrial genome maintenance (GO:0000002)	9	5	0.9143	+	1
pyrimidine ribonucleotide metabolic process (GO:0009218)	9	3	0.9143	+	1
morphogenesis of larval imaginal disc epithelium (GO:0016335)	9	1	0.9143	+	1
peptide biosynthetic process (GO:0043043)	9	2	0.9143	+	1
negative regulation of chromosome organization (GO:2001251)	9	1	0.9143	+	1
nonassociative learning (GO:0046958)	9	1	0.9143	+	1
nucleoside diphosphate metabolic process (GO:0009132)	9	4	0.9143	+	1
protein ADP-ribosylation (GO:0006471)	9	5	0.9143	+	1
regulation of phosphatase activity (GO:0010921)	9	1	0.9143	+	1
regulation of protein dephosphorylation (GO:0035304)	9	1	0.9143	+	1
aspartate family amino acid biosynthetic process (GO:0009067)	9	2	0.9143	+	1
negative regulation of nucleocytoplasmic transport (GO:0046823)	9	1	0.9143	+	1
production of siRNA involved in RNA interference (GO:0030422)	9	1	0.9143	+	1
positive regulation of nuclear division (GO:0051785)	9	1	0.9143	+	1
respiratory chain complex IV assembly (GO:0008535)	9	5	0.9143	+	1
anterior head segmentation (GO:0035288)	9	1	0.9143	+	1
pyrimidine nucleobase metabolic process (GO:0006206)	9	1	0.9143	+	1
negative regulation of intracellular protein transport (GO:0090317)	9	1	0.9143	+	1
negative regulation of chromatin silencing (GO:0031936)	9	1	0.9143	+	1
mannose metabolic process (GO:0006013)	9	1	0.9143	+	1
glucose catabolic process (GO:0006007)	9	1	0.9143	+	1
regulation of post-embryonic development (GO:0048580)	9	1	0.9143	+	1
anterior head development (GO:0097065)	9	1	0.9143	+	1
adherens junction maintenance (GO:0034334)	9	1	0.9143	+	1
cyclin catabolic process (GO:0008054)	9	1	0.9143	+	1
larval visceral muscle development (GO:0007523)	9	1	0.9143	+	1
positive regulation of TOR signaling (GO:0032008)	9	3	0.9143	+	1
mesenchyme development (GO:0060485)	9	1	0.9143	+	1
histoblast morphogenesis (GO:0007488)	9	2	0.9143	+	1
progression of morphogenetic furrow involved in compound eye morphogenesis (GO:0007458)	9	1	0.9143	+	1
mitochondrion distribution (GO:0048311)	9	1	0.9143	+	1
positive regulation of sequence-specific DNA binding transcription factor activity (GO:0051091)	9	2	0.9143	+	1
negative regulation of hemocyte differentiation (GO:0045611)	9	1	0.9143	+	1
chromosome organization involved in meiosis (GO:0070192)	9	1	0.9143	+	1
detection of biotic stimulus (GO:0009595)	9	1	0.9143	+	1
response to anesthetic (GO:0072347)	9	1	0.9143	+	1
post-Golgi vesicle-mediated transport (GO:0006892)	10	4	1.016	+	1
copper ion transport (GO:0006825)	10	2	1.016	+	1
positive regulation of protein maturation (GO:1903319)	10	2	1.016	+	1
endomitotic cell cycle (GO:0007113)	10	2	1.016	+	1
TORC1 signaling (GO:0038202)	10	1	1.016	-	1
germarium-derived female germ-line cyst encapsulation (GO:0030708)	10	1	1.016	-	1
ubiquitin-dependent protein catabolic process via the multivesicular body sorting pathway (GO:0043162)	10	3	1.016	+	1
positive regulation of defense response to virus by host (GO:0002230)	10	1	1.016	-	1
optic lobe placode development (GO:0001748)	10	1	1.016	-	1
anion homeostasis (GO:0055081)	10	1	1.016	-	1
iron ion homeostasis (GO:0055072)	10	1	1.016	-	1
methionine metabolic process (GO:0006555)	10	1	1.016	-	1
glycine metabolic process (GO:0006544)	10	2	1.016	+	1
regulation of chromatin assembly or disassembly (GO:0001672)	10	2	1.016	+	1
response to hydrogen peroxide (GO:0042542)	10	3	1.016	+	1
cellular response to ionizing radiation (GO:0071479)	10	1	1.016	-	1
positive regulation of protein processing (GO:0010954)	10	2	1.016	+	1
telomere capping (GO:0016233)	10	3	1.016	+	1
zonula adherens assembly (GO:0045186)	10	1	1.016	-	1
apical protein localization (GO:0045176)	10	2	1.016	+	1
monocarboxylic acid transport (GO:0015718)	10	1	1.016	-	1
mRNA splice site selection (GO:0006376)	10	1	1.016	-	1
chorion-containing eggshell pattern formation (GO:0030381)	10	1	1.016	-	1
pyrimidine nucleotide biosynthetic process (GO:0006221)	10	2	1.016	+	1
epithelial cell type specification, open tracheal system (GO:0035153)	10	2	1.016	+	1
response to arsenic-containing substance (GO:0046685)	10	1	1.016	-	1
regulation of carbohydrate metabolic process (GO:0006109)	10	2	1.016	+	1
negative regulation of intracellular transport (GO:0032387)	10	2	1.016	+	1
retrograde transport, endosome to Golgi (GO:0042147)	10	1	1.016	-	1
glycerol-3-phosphate metabolic process (GO:0006072)	10	1	1.016	-	1
detection of light stimulus involved in sensory perception (GO:0050962)	10	1	1.016	-	1
negative regulation of DNA replication (GO:0008156)	10	3	1.016	+	1
monosaccharide catabolic process (GO:0046365)	10	1	1.016	-	1
positive regulation of proteolysis (GO:0045862)	10	2	1.016	+	1
eclosion rhythm (GO:0008062)	10	1	1.016	-	1
protein depolymerization (GO:0051261)	10	1	1.016	-	1
regulation of DNA binding (GO:0051101)	10	2	1.016	+	1
haltere development (GO:0007482)	10	1	1.016	-	1
regulation of defense response to virus by host (GO:0050691)	10	1	1.016	-	1
flight (GO:0060361)	10	2	1.016	+	1
hexose catabolic process (GO:0019320)	10	1	1.016	-	1
determination of left/right symmetry (GO:0007368)	10	1	1.016	-	1
pole plasm protein localization (GO:0007318)	10	1	1.016	-	1
protein localization to Golgi apparatus (GO:0034067)	11	1	1.117	-	1
nuclear-transcribed mRNA catabolic process, deadenylation-dependent decay (GO:0000288)	11	1	1.117	-	1
cystoblast division (GO:0007282)	11	1	1.117	-	1
alditol phosphate metabolic process (GO:0052646)	11	1	1.117	-	1
response to cold (GO:0009409)	11	4	1.117	+	1
female germ-line cyst encapsulation (GO:0048139)	11	1	1.117	-	1
germ-line cyst encapsulation (GO:0048138)	11	1	1.117	-	1
polarized epithelial cell differentiation (GO:0030859)	11	1	1.117	-	1
sex comb development (GO:0045498)	11	1	1.117	-	1
male meiosis I (GO:0007141)	11	2	1.117	+	1
positive regulation of transcription elongation from RNA polymerase II promoter (GO:0032968)	11	1	1.117	-	1
G2/M transition of mitotic cell cycle (GO:0000086)	11	1	1.117	-	1
spindle stabilization (GO:0043146)	11	1	1.117	-	1
protein targeting to Golgi (GO:0000042)	11	1	1.117	-	1
regulation of exit from mitosis (GO:0007096)	11	1	1.117	-	1
lysosome organization (GO:0007040)	11	3	1.117	+	1
endosome organization (GO:0007032)	11	1	1.117	-	1
microtubule nucleation (GO:0007020)	11	1	1.117	-	1
regulation of histone methylation (GO:0031060)	11	1	1.117	-	1
response to caffeine (GO:0031000)	11	1	1.117	-	1
pteridine-containing compound biosynthetic process (GO:0042559)	11	1	1.117	-	1
response to purine-containing compound (GO:0014074)	11	1	1.117	-	1
establishment of epithelial cell apical/basal polarity (GO:0045198)	11	1	1.117	-	1
ethanolamine-containing compound metabolic process (GO:0042439)	11	1	1.117	-	1
negative regulation of stem cell proliferation (GO:2000647)	11	1	1.117	-	1
chitin-based larval cuticle pattern formation (GO:0035293)	11	1	1.117	-	1
multicellular organism growth (GO:0035264)	11	1	1.117	-	1
haltere disc development (GO:0035216)	11	1	1.117	-	1
tetrapyrrole biosynthetic process (GO:0033014)	11	3	1.117	+	1
pyrimidine nucleoside metabolic process (GO:0006213)	11	3	1.117	+	1
hemocyte proliferation (GO:0035172)	11	1	1.117	-	1
female sex determination (GO:0030237)	11	3	1.117	+	1
positive regulation of Rho GTPase activity (GO:0032321)	11	1	1.117	-	1
negative regulation of transposition (GO:0010529)	11	2	1.117	+	1
glycosaminoglycan biosynthetic process (GO:0006024)	11	2	1.117	+	1
sensory perception of touch (GO:0050975)	11	1	1.117	-	1
actin polymerization or depolymerization (GO:0008154)	11	1	1.117	-	1
establishment of protein localization to Golgi (GO:0072600)	11	1	1.117	-	1
adult walking behavior (GO:0007628)	11	1	1.117	-	1
cell junction maintenance (GO:0034331)	11	1	1.117	-	1
Arp2/3 complex-mediated actin nucleation (GO:0034314)	11	3	1.117	+	1
negative regulation of response to external stimulus (GO:0032102)	11	2	1.117	+	1
response to gamma radiation (GO:0010332)	11	1	1.117	-	1
positive regulation of protein secretion (GO:0050714)	11	1	1.117	-	1
pyrimidine ribonucleoside metabolic process (GO:0046131)	11	3	1.117	+	1
regulation of secondary metabolic process (GO:0043455)	11	1	1.117	-	1
retrograde transport, vesicle recycling within Golgi (GO:0000301)	11	1	1.117	-	1
female germline ring canal formation (GO:0007301)	12	1	1.219	-	1
chloride transport (GO:0006821)	12	1	1.219	-	1
response to dsRNA (GO:0043331)	12	1	1.219	-	1
NADP metabolic process (GO:0006739)	12	1	1.219	-	1
establishment of mitotic spindle orientation (GO:0000132)	12	1	1.219	-	1
regulation of post-mating oviposition (GO:0048042)	12	3	1.219	+	1
glycerol ether metabolic process (GO:0006662)	12	2	1.219	+	1
mitotic metaphase plate congression (GO:0007080)	12	2	1.219	+	1
ATP-dependent chromatin remodeling (GO:0043044)	12	3	1.219	+	1
positive regulation of histone modification (GO:0031058)	12	2	1.219	+	1
dsRNA fragmentation (GO:0031050)	12	1	1.219	-	1
positive regulation of DNA-templated transcription, elongation (GO:0032786)	12	2	1.219	+	1
protein O-linked glycosylation (GO:0006493)	12	1	1.219	-	1
negative regulation of BMP signaling pathway (GO:0030514)	12	1	1.219	-	1
'de novo' protein folding (GO:0006458)	12	5	1.219	+	1
production of small RNA involved in gene silencing by RNA (GO:0070918)	12	1	1.219	-	1
RNA methylation (GO:0001510)	12	2	1.219	+	1
cellular response to dsRNA (GO:0071359)	12	1	1.219	-	1
regulation of mitochondrion organization (GO:0010821)	12	2	1.219	+	1
ectopic germ cell programmed cell death (GO:0035234)	12	1	1.219	-	1
imaginal disc lineage restriction (GO:0035161)	12	1	1.219	-	1
maintenance of epithelial integrity, open tracheal system (GO:0035160)	12	1	1.219	-	1
positive regulation of wound healing (GO:0090303)	12	1	1.219	-	1
negative regulation of insulin receptor signaling pathway (GO:0046627)	12	1	1.219	-	1
cell adhesion involved in heart morphogenesis (GO:0061343)	12	1	1.219	-	1
heparan sulfate proteoglycan metabolic process (GO:0030201)	12	2	1.219	+	1
liquid clearance, open tracheal system (GO:0035002)	12	2	1.219	+	1
negative regulation of cellular response to insulin stimulus (GO:1900077)	12	1	1.219	-	1
regulation of transposition (GO:0010528)	12	2	1.219	+	1
negative regulation of autophagy (GO:0010507)	12	5	1.219	+	1
microtubule anchoring (GO:0034453)	12	3	1.219	+	1
positive regulation of mitotic cell cycle (GO:0045931)	12	1	1.219	-	1
positive regulation of lyase activity (GO:0051349)	12	1	1.219	-	1
organic hydroxy compound catabolic process (GO:1901616)	12	1	1.219	-	1
positive regulation of smoothened signaling pathway (GO:0045880)	12	1	1.219	-	1
negative regulation of protein transport (GO:0051224)	12	1	1.219	-	1
regulation of mitotic cell cycle, embryonic (GO:0009794)	12	1	1.219	-	1
foregut morphogenesis (GO:0007440)	12	1	1.219	-	1
larval salivary gland morphogenesis (GO:0007436)	12	1	1.219	-	1
alcohol catabolic process (GO:0046164)	12	1	1.219	-	1
heparan sulfate proteoglycan biosynthetic process (GO:0015012)	12	2	1.219	+	1
ether metabolic process (GO:0018904)	12	2	1.219	+	1
positive regulation of MAP kinase activity (GO:0043406)	12	1	1.219	-	1
dorsal closure, elongation of leading edge cells (GO:0007394)	12	1	1.219	-	1
spermatocyte division (GO:0048137)	13	2	1.321	+	1
female germ-line stem cell asymmetric division (GO:0048132)	13	2	1.321	+	1
compound eye pigmentation (GO:0048072)	13	1	1.321	-	1
metallo-sulfur cluster assembly (GO:0031163)	13	5	1.321	+	1
mitotic spindle assembly checkpoint (GO:0007094)	13	3	1.321	+	1
endoplasmic reticulum organization (GO:0007029)	13	2	1.321	+	1
intracellular protein transmembrane import (GO:0044743)	13	3	1.321	+	1
regulation of macroautophagy (GO:0016241)	13	1	1.321	-	1
iron-sulfur cluster assembly (GO:0016226)	13	5	1.321	+	1
glutamine family amino acid biosynthetic process (GO:0009084)	13	1	1.321	-	1
positive regulation of response to wounding (GO:1903036)	13	1	1.321	-	1
pseudouridine synthesis (GO:0001522)	13	3	1.321	+	1
synaptic vesicle coating (GO:0016183)	13	5	1.321	+	1
synaptic vesicle priming (GO:0016082)	13	2	1.321	+	1
DNA replication initiation (GO:0006270)	13	3	1.321	+	1
pyrimidine nucleotide metabolic process (GO:0006220)	13	5	1.321	+	1
larval lymph gland hemopoiesis (GO:0035167)	13	1	1.321	-	1
post-embryonic hemopoiesis (GO:0035166)	13	1	1.321	-	1
lumen formation, open tracheal system (GO:0035149)	13	1	1.321	-	1
positive regulation of organ growth (GO:0046622)	13	1	1.321	-	1
spindle assembly checkpoint (GO:0071173)	13	3	1.321	+	1
regulation of proteasomal ubiquitin-dependent protein catabolic process (GO:0032434)	13	4	1.321	+	1
histone H4 acetylation (GO:0043967)	13	1	1.321	-	1
establishment of apical/basal cell polarity (GO:0035089)	13	1	1.321	-	1
mitochondrial electron transport, ubiquinol to cytochrome c (GO:0006122)	13	4	1.321	+	1
regulation of spindle organization (GO:0090224)	13	3	1.321	+	1
isoprenoid biosynthetic process (GO:0008299)	13	2	1.321	+	1
regulation of meiotic cell cycle (GO:0051445)	13	1	1.321	-	1
peptidoglycan recognition protein signaling pathway (GO:0061057)	13	1	1.321	-	1
regulation of wound healing (GO:0061041)	13	1	1.321	-	1
regulation of defense response to virus (GO:0050688)	13	2	1.321	+	1
oviposition (GO:0018991)	13	1	1.321	-	1
vesicle coating (GO:0006901)	13	5	1.321	+	1
Notch receptor processing (GO:0007220)	14	2	1.422	+	1
G1/S transition of mitotic cell cycle (GO:0000082)	14	4	1.422	+	1
autophagic vacuole fusion (GO:0000046)	14	2	1.422	+	1
compound eye cone cell differentiation (GO:0042675)	14	2	1.422	+	1
spindle assembly involved in female meiosis (GO:0007056)	14	3	1.422	+	1
cell cycle G1/S phase transition (GO:0044843)	14	4	1.422	+	1
regulation of cell cycle G2/M phase transition (GO:1902749)	14	1	1.422	-	1
regulation of stem cell differentiation (GO:2000736)	14	1	1.422	-	1
intracellular receptor signaling pathway (GO:0030522)	14	1	1.422	-	1
regulation of translational initiation (GO:0006446)	14	3	1.422	+	1
female gonad development (GO:0008585)	14	1	1.422	-	1
transcription from RNA polymerase III promoter (GO:0006383)	14	5	1.422	+	1
actin nucleation (GO:0045010)	14	3	1.422	+	1
tetrapyrrole metabolic process (GO:0033013)	14	3	1.422	+	1
protein autophosphorylation (GO:0046777)	14	1	1.422	-	1
centrosome localization (GO:0051642)	14	1	1.422	-	1
post-embryonic genitalia morphogenesis (GO:0035126)	14	1	1.422	-	1
imaginal disc-derived genitalia morphogenesis (GO:0048805)	14	1	1.422	-	1
imaginal disc-derived male genitalia morphogenesis (GO:0048803)	14	1	1.422	-	1
mitotic spindle checkpoint (GO:0071174)	14	4	1.422	+	1
regulation of symbiosis, encompassing mutualism through parasitism (GO:0043903)	14	4	1.422	+	1
positive regulation of chromatin silencing (GO:0031937)	14	3	1.422	+	1
TOR signaling (GO:0031929)	14	1	1.422	-	1
somatic stem cell maintenance (GO:0035019)	14	1	1.422	-	1
development of primary female sexual characteristics (GO:0046545)	14	1	1.422	-	1
cell-cell adhesion mediated by cadherin (GO:0044331)	14	1	1.422	-	1
regulation of Rho GTPase activity (GO:0032319)	14	1	1.422	-	1
establishment of epithelial cell polarity (GO:0090162)	14	1	1.422	-	1
regulation of proteasomal protein catabolic process (GO:0061136)	14	4	1.422	+	1
determination of bilateral symmetry (GO:0009855)	14	1	1.422	-	1
regulation of G2/M transition of mitotic cell cycle (GO:0010389)	14	1	1.422	-	1
membrane invagination (GO:0010324)	14	1	1.422	-	1
specification of symmetry (GO:0009799)	14	1	1.422	-	1
pyrimidine-containing compound biosynthetic process (GO:0072528)	14	2	1.422	+	1
primary sex determination, soma (GO:0007539)	14	3	1.422	+	1
positive regulation of protein catabolic process (GO:0045732)	14	3	1.422	+	1
spindle checkpoint (GO:0031577)	14	4	1.422	+	1
negative regulation of neuron apoptotic process (GO:0043524)	14	4	1.422	+	1
salivary gland boundary specification (GO:0007432)	14	1	1.422	-	1
positive regulation of protein serine/threonine kinase activity (GO:0071902)	14	1	1.422	-	1
muscle contraction (GO:0006936)	14	1	1.422	-	1
phagocytosis, engulfment (GO:0006911)	14	1	1.422	-	1
Rho protein signal transduction (GO:0007266)	15	1	1.524	-	1
startle response (GO:0001964)	15	3	1.524	+	1
regulation of synaptic plasticity (GO:0048167)	15	1	1.524	-	1
apoptotic cell clearance (GO:0043277)	15	1	1.524	-	1
positive regulation of chromatin modification (GO:1903310)	15	2	1.524	+	1
oocyte localization involved in germarium-derived egg chamber formation (GO:0030720)	15	1	1.524	-	1
sulfur amino acid metabolic process (GO:0000096)	15	2	1.524	+	1
muscle cell fate commitment (GO:0042693)	15	1	1.524	-	1
imaginal disc-derived leg joint morphogenesis (GO:0016348)	15	1	1.524	-	1
regulation of lamellipodium organization (GO:1902743)	15	2	1.524	+	1
positive regulation of chromosome organization (GO:2001252)	15	2	1.524	+	1
pteridine-containing compound metabolic process (GO:0042558)	15	2	1.524	+	1
male anatomical structure morphogenesis (GO:0090598)	15	1	1.524	-	1
aspartate family amino acid metabolic process (GO:0009066)	15	2	1.524	+	1
regulation of response to wounding (GO:1903034)	15	1	1.524	-	1
synaptic vesicle budding from presynaptic membrane (GO:0016185)	15	5	1.524	+	1
synaptic vesicle docking involved in exocytosis (GO:0016081)	15	1	1.524	-	1
oocyte nucleus localization involved in oocyte dorsal/ventral axis specification (GO:0051663)	15	1	1.524	-	1
mitochondrion localization (GO:0051646)	15	1	1.524	-	1
defense response to virus (GO:0051607)	15	1	1.524	-	1
brain morphogenesis (GO:0048854)	15	3	1.524	+	1
male genitalia morphogenesis (GO:0048808)	15	1	1.524	-	1
cellular response to reactive oxygen species (GO:0034614)	15	3	1.524	+	1
purine nucleobase metabolic process (GO:0006144)	15	1	1.524	-	1
pupariation (GO:0035073)	15	2	1.524	+	1
regulation of lamellipodium assembly (GO:0010591)	15	2	1.524	+	1
positive regulation of filopodium assembly (GO:0051491)	15	1	1.524	-	1
snRNA 3'-end processing (GO:0034472)	15	1	1.524	-	1
adherens junction assembly (GO:0034333)	15	1	1.524	-	1
regulation of response to nutrient levels (GO:0032107)	15	1	1.524	-	1
regulation of response to extracellular stimulus (GO:0032104)	15	1	1.524	-	1
germline stem cell asymmetric division (GO:0098728)	15	2	1.524	+	1
amide biosynthetic process (GO:0043604)	15	3	1.524	+	1
eclosion (GO:0007562)	15	1	1.524	-	1
visceral muscle development (GO:0007522)	15	1	1.524	-	1
regulation of protein secretion (GO:0050708)	15	2	1.524	+	1
regulation of transcription elongation from RNA polymerase II promoter (GO:0034243)	15	1	1.524	-	1
R8 cell fate commitment (GO:0007460)	15	1	1.524	-	1
axon target recognition (GO:0007412)	15	1	1.524	-	1
activation of cysteine-type endopeptidase activity involved in apoptotic process (GO:0006919)	15	2	1.524	+	1
negative regulation of DNA metabolic process (GO:0051053)	15	3	1.524	+	1
synaptic vesicle budding (GO:0070142)	15	5	1.524	+	1
protein complex disassembly (GO:0043241)	16	4	1.625	+	1
germarium-derived female germ-line cyst formation (GO:0030727)	16	2	1.625	+	1
germline ring canal formation (GO:0030725)	16	1	1.625	-	1
cell cycle G2/M phase transition (GO:0044839)	16	1	1.625	-	1
cellular transition metal ion homeostasis (GO:0046916)	16	2	1.625	+	1
regulation of metal ion transport (GO:0010959)	16	2	1.625	+	1
regulation of dephosphorylation (GO:0035303)	16	1	1.625	-	1
regulation of Toll signaling pathway (GO:0008592)	16	1	1.625	-	1
mRNA cleavage (GO:0006379)	16	2	1.625	+	1
microtubule polymerization (GO:0046785)	16	2	1.625	+	1
endosome transport via multivesicular body sorting pathway (GO:0032509)	16	5	1.625	+	1
regulation of gene silencing by RNA (GO:0060966)	16	1	1.625	-	1
genitalia morphogenesis (GO:0035112)	16	1	1.625	-	1
lipid storage (GO:0019915)	16	3	1.625	+	1
regulation of insulin receptor signaling pathway (GO:0046626)	16	2	1.625	+	1
establishment or maintenance of monopolar cell polarity (GO:0061339)	16	1	1.625	-	1
locomotion involved in locomotory behavior (GO:0031987)	16	4	1.625	+	1
positive regulation of NFAT protein import into nucleus (GO:0051533)	16	1	1.625	-	1
regulation of NFAT protein import into nucleus (GO:0051532)	16	1	1.625	-	1
establishment of glial blood-brain barrier (GO:0060857)	16	1	1.625	-	1
activation of cysteine-type endopeptidase activity (GO:0097202)	16	3	1.625	+	1
proteoglycan biosynthetic process (GO:0030166)	16	2	1.625	+	1
regulation of cellular response to insulin stimulus (GO:1900076)	16	2	1.625	+	1
aminoglycan biosynthetic process (GO:0006023)	16	2	1.625	+	1
epithelial fluid transport (GO:0042045)	16	2	1.625	+	1
establishment of monopolar cell polarity (GO:0061162)	16	1	1.625	-	1
regulation of lyase activity (GO:0051339)	16	1	1.625	-	1
metaphase plate congression (GO:0051310)	16	2	1.625	+	1
negative regulation of metaphase/anaphase transition of cell cycle (GO:1902100)	16	4	1.625	+	1
centrosome separation (GO:0051299)	16	2	1.625	+	1
establishment of spindle orientation (GO:0051294)	16	1	1.625	-	1
negative regulation of mitotic metaphase/anaphase transition (GO:0045841)	16	4	1.625	+	1
reactive oxygen species metabolic process (GO:0072593)	16	3	1.625	+	1
cellular protein complex disassembly (GO:0043624)	16	4	1.625	+	1
response to nutrient (GO:0007584)	16	1	1.625	-	1
regulation of TOR signaling (GO:0032006)	16	4	1.625	+	1
positive regulation of translation (GO:0045727)	16	2	1.625	+	1
leg disc proximal/distal pattern formation (GO:0007479)	16	1	1.625	-	1
R3/R4 cell fate commitment (GO:0007464)	16	1	1.625	-	1
regulation of binding (GO:0051098)	16	4	1.625	+	1
cytoplasmic transport, nurse cell to oocyte (GO:0007303)	17	3	1.727	+	1
receptor-mediated endocytosis (GO:0006898)	17	2	1.727	+	1
spliceosomal complex assembly (GO:0000245)	17	4	1.727	+	1
negative regulation of neuron death (GO:1901215)	17	4	1.727	+	1
positive regulation of actin filament polymerization (GO:0030838)	17	3	1.727	+	1
positive regulation of cysteine-type endopeptidase activity involved in apoptotic process (GO:0043280)	17	3	1.727	+	1
regulation of cellular protein catabolic process (GO:1903362)	17	4	1.727	+	1
macromolecular complex disassembly (GO:0032984)	17	4	1.727	+	1
R3/R4 cell differentiation (GO:0048056)	17	2	1.727	+	1
mitotic anaphase (GO:0000090)	17	1	1.727	-	1
regulation of cyclin-dependent protein serine/threonine kinase activity (GO:0000079)	17	5	1.727	+	1
actomyosin contractile ring organization (GO:0044837)	17	2	1.727	+	1
intercellular bridge organization (GO:0043063)	17	1	1.727	-	1
organic hydroxy compound transport (GO:0015850)	17	1	1.727	-	1
protein N-linked glycosylation (GO:0006487)	17	1	1.727	-	1
tRNA modification (GO:0006400)	17	4	1.727	+	1
serine family amino acid metabolic process (GO:0009069)	17	3	1.727	+	1
response to drug (GO:0042493)	17	1	1.727	-	1
regulation of proteolysis involved in cellular protein catabolic process (GO:1903050)	17	4	1.727	+	1
chromosome localization (GO:0050000)	17	2	1.727	+	1
snRNA processing (GO:0016180)	17	1	1.727	-	1
prepupal development (GO:0035210)	17	2	1.727	+	1
snRNA metabolic process (GO:0016073)	17	1	1.727	-	1
regulation of DNA replication (GO:0006275)	17	4	1.727	+	1
syncytial blastoderm mitotic cell cycle (GO:0035186)	17	4	1.727	+	1
actomyosin contractile ring assembly (GO:0000915)	17	2	1.727	+	1
positive regulation of mitotic cell cycle phase transition (GO:1901992)	17	3	1.727	+	1
positive regulation of cell cycle phase transition (GO:1901989)	17	3	1.727	+	1
negative regulation of gene silencing (GO:0060969)	17	1	1.727	-	1
epithelial structure maintenance (GO:0010669)	17	2	1.727	+	1
histone H3-K4 methylation (GO:0051568)	17	2	1.727	+	1
organelle membrane fusion (GO:0090174)	17	2	1.727	+	1
proteoglycan metabolic process (GO:0006029)	17	2	1.727	+	1
nicotinamide nucleotide metabolic process (GO:0046496)	17	1	1.727	-	1
maintenance of cell polarity (GO:0030011)	17	2	1.727	+	1
chromosome separation (GO:0051304)	17	3	1.727	+	1
establishment of chromosome localization (GO:0051303)	17	2	1.727	+	1
unidimensional cell growth (GO:0009826)	17	2	1.727	+	1
positive regulation of gene expression, epigenetic (GO:0045815)	17	2	1.727	+	1
positive regulation of endocytosis (GO:0045807)	17	2	1.727	+	1
regulation of neuron apoptotic process (GO:0043523)	17	4	1.727	+	1
terminal branching, open tracheal system (GO:0007430)	17	2	1.727	+	1
alcohol biosynthetic process (GO:0046165)	17	1	1.727	-	1
nucleobase biosynthetic process (GO:0046112)	17	1	1.727	-	1
pyridine nucleotide metabolic process (GO:0019362)	17	1	1.727	-	1
initiation of dorsal closure (GO:0007392)	17	1	1.727	-	1
ventral furrow formation (GO:0007370)	17	2	1.727	+	1
female germ-line cyst formation (GO:0048135)	18	2	1.829	+	1
peroxisome organization (GO:0007031)	18	3	1.829	+	1
plasma membrane organization (GO:0007009)	18	2	1.829	+	1
male genitalia development (GO:0030539)	18	1	1.829	-	1
fatty acid elongation (GO:0030497)	18	1	1.829	-	1
mRNA polyadenylation (GO:0006378)	18	1	1.829	-	1
positive regulation of cysteine-type endopeptidase activity (GO:2001056)	18	3	1.829	+	1
leg disc pattern formation (GO:0035223)	18	1	1.829	-	1
heterochromatin organization (GO:0070828)	18	2	1.829	+	1
assembly of actomyosin apparatus involved in cytokinesis (GO:0000912)	18	2	1.829	+	1
regulation of oviposition (GO:0046662)	18	3	1.829	+	1
hemocyte migration (GO:0035099)	18	2	1.829	+	1
larval midgut cell programmed cell death (GO:0035096)	18	2	1.829	+	1
establishment of blood-brain barrier (GO:0060856)	18	1	1.829	-	1
cell fate commitment involved in formation of primary germ layer (GO:0060795)	18	1	1.829	-	1
polyol metabolic process (GO:0019751)	18	2	1.829	+	1
DNA endoreduplication (GO:0042023)	18	2	1.829	+	1
short-term memory (GO:0007614)	18	1	1.829	-	1
negative regulation of smoothened signaling pathway (GO:0045879)	18	3	1.829	+	1
negative regulation of mitosis (GO:0045839)	18	4	1.829	+	1
genital disc morphogenesis (GO:0007483)	18	1	1.829	-	1
trachea morphogenesis (GO:0060439)	18	2	1.829	+	1
somatic sex determination (GO:0018993)	18	4	1.829	+	1
specification of segmental identity, head (GO:0007380)	18	1	1.829	-	1
eggshell chorion gene amplification (GO:0007307)	19	3	1.93	+	1
ommochrome biosynthetic process (GO:0006727)	19	2	1.93	+	1
organism emergence from protective structure (GO:0071684)	19	1	1.93	-	1
cell cycle comprising mitosis without cytokinesis (GO:0033301)	19	4	1.93	+	1
microtubule polymerization or depolymerization (GO:0031109)	19	2	1.93	+	1
negative regulation of microtubule depolymerization (GO:0007026)	19	1	1.93	-	1
GPI anchor biosynthetic process (GO:0006506)	19	2	1.93	+	1
positive regulation of endopeptidase activity (GO:0010950)	19	3	1.93	+	1
ocellus pigmentation (GO:0033060)	19	2	1.93	+	1
cellular modified amino acid biosynthetic process (GO:0042398)	19	3	1.93	+	1
positive regulation of protein import into nucleus (GO:0042307)	19	1	1.93	-	1
spindle assembly involved in meiosis (GO:0090306)	19	3	1.93	+	1
negative regulation of organ growth (GO:0046621)	19	1	1.93	-	1
negative regulation of multi-organism process (GO:0043901)	19	4	1.93	+	1
imaginal disc fusion, thorax closure (GO:0046529)	19	1	1.93	-	1
imaginal disc fusion (GO:0046528)	19	1	1.93	-	1
neuromuscular process (GO:0050905)	19	3	1.93	+	1
positive regulation of protein polymerization (GO:0032273)	19	3	1.93	+	1
fluid transport (GO:0042044)	19	2	1.93	+	1
negative regulation of transferase activity (GO:0051348)	19	1	1.93	-	1
anaphase (GO:0051322)	19	1	1.93	-	1
negative regulation of catabolic process (GO:0009895)	19	7	1.93	+	1
ocellus pigment biosynthetic process (GO:0008055)	19	2	1.93	+	1
protein homooligomerization (GO:0051260)	19	3	1.93	+	1
RNA polyadenylation (GO:0043631)	19	1	1.93	-	1
zymogen activation (GO:0031638)	19	3	1.93	+	1
primary sex determination (GO:0007538)	19	3	1.93	+	1
imaginal disc growth (GO:0007446)	19	3	1.93	+	1
ocellus pigment metabolic process (GO:0046158)	19	2	1.93	+	1
ommochrome metabolic process (GO:0046152)	19	2	1.93	+	1
negative regulation of transport (GO:0051051)	19	2	1.93	+	1
positive regulation of secretion (GO:0051047)	19	1	1.93	-	1
positive regulation of transcription factor import into nucleus (GO:0042993)	19	1	1.93	-	1
protein transmembrane transport (GO:0071806)	20	7	2.032	+	1
regulation of protein ubiquitination (GO:0031396)	20	2	2.032	-	1
pole cell formation (GO:0007279)	20	2	2.032	-	1
isoprenoid metabolic process (GO:0006720)	20	2	2.032	-	1
intracellular protein transmembrane transport (GO:0065002)	20	7	2.032	+	1
meiosis II (GO:0007135)	20	1	2.032	-	1
negative regulation of microtubule polymerization or depolymerization (GO:0031111)	20	1	2.032	-	1
vacuole organization (GO:0007033)	20	4	2.032	+	1
cellular metabolic compound salvage (GO:0043094)	20	1	2.032	-	1
regulation of DNA-templated transcription, elongation (GO:0032784)	20	2	2.032	-	1
regulation of imaginal disc-derived wing size (GO:0044719)	20	1	2.032	-	1
regulation of neuroblast proliferation (GO:1902692)	20	1	2.032	-	1
positive regulation of peptidase activity (GO:0010952)	20	3	2.032	+	1
regulation of circadian sleep/wake cycle, sleep (GO:0045187)	20	1	2.032	-	1
negative regulation of nuclear division (GO:0051784)	20	4	2.032	+	1
regulation of cell migration (GO:0030334)	20	1	2.032	-	1
nucleus localization (GO:0051647)	20	2	2.032	-	1
tube formation (GO:0035148)	20	1	2.032	-	1
branch fusion, open tracheal system (GO:0035147)	20	3	2.032	+	1
tube fusion (GO:0035146)	20	3	2.032	+	1
larval chitin-based cuticle development (GO:0008363)	20	1	2.032	-	1
positive regulation of autophagy (GO:0010508)	20	2	2.032	-	1
glucose metabolic process (GO:0006006)	20	1	2.032	-	1
regulation of cell-cell adhesion (GO:0022407)	20	1	2.032	-	1
molting cycle process (GO:0022404)	20	1	2.032	-	1
regulation of cell motility (GO:2000145)	20	1	2.032	-	1
ncRNA 3'-end processing (GO:0043628)	20	3	2.032	+	1
R7 cell fate commitment (GO:0007465)	20	2	2.032	-	1
response to virus (GO:0009615)	20	3	2.032	+	1
muscle system process (GO:0003012)	20	1	2.032	-	1
vesicle fusion (GO:0006906)	20	3	2.032	+	1
germ-band shortening (GO:0007390)	20	2	2.032	-	1
R8 cell differentiation (GO:0045465)	21	1	2.133	-	1
negative regulation of protein complex disassembly (GO:0043242)	21	1	2.133	-	1
regulation of protein modification by small protein conjugation or removal (GO:1903320)	21	2	2.133	-	1
fatty acid beta-oxidation (GO:0006635)	21	2	2.133	-	1
regulation of microtubule depolymerization (GO:0031114)	21	1	2.133	-	1
dendrite guidance (GO:0070983)	21	2	2.133	-	1
regulation of lipid storage (GO:0010883)	21	2	2.133	-	1
cuticle development involved in chitin-based cuticle molting cycle (GO:0042337)	21	1	2.133	-	1
DNA amplification (GO:0006277)	21	3	2.133	+	1
establishment of mitotic spindle localization (GO:0040001)	21	1	2.133	-	1
cellular component maintenance (GO:0043954)	21	1	2.133	-	1
negative regulation of protein depolymerization (GO:1901880)	21	1	2.133	-	1
insulin receptor signaling pathway (GO:0008286)	21	1	2.133	-	1
regulation of establishment of planar polarity (GO:0090175)	21	1	2.133	-	1
telomere maintenance (GO:0000723)	21	5	2.133	+	1
negative regulation of transmembrane receptor protein serine/threonine kinase signaling pathway (GO:0090101)	21	1	2.133	-	1
telomere organization (GO:0032200)	21	5	2.133	+	1
regulation of neural precursor cell proliferation (GO:2000177)	21	1	2.133	-	1
axon cargo transport (GO:0008088)	21	1	2.133	-	1
imaginal disc-derived male genitalia development (GO:0007485)	21	1	2.133	-	1
proximal/distal pattern formation, imaginal disc (GO:0007449)	21	2	2.133	-	1
vesicle docking involved in exocytosis (GO:0006904)	21	1	2.133	-	1
actin filament bundle assembly (GO:0051017)	21	1	2.133	-	1
vesicle docking (GO:0048278)	21	1	2.133	-	1
intra-Golgi vesicle-mediated transport (GO:0006891)	22	2	2.235	-	1
regulation of cysteine-type endopeptidase activity involved in apoptotic process (GO:0043281)	22	4	2.235	+	1
regulation of ion transport (GO:0043269)	22	2	2.235	-	1
male courtship behavior, veined wing generated song production (GO:0045433)	22	1	2.235	-	1
transforming growth factor beta receptor signaling pathway (GO:0007179)	22	1	2.235	-	1
sensory organ precursor cell fate determination (GO:0016360)	22	3	2.235	+	1
transition metal ion homeostasis (GO:0055076)	22	2	2.235	-	1
positive regulation of nucleocytoplasmic transport (GO:0046824)	22	1	2.235	-	1
actin filament bundle organization (GO:0061572)	22	1	2.235	-	1
protein palmitoylation (GO:0018345)	22	1	2.235	-	1
spiracle morphogenesis, open tracheal system (GO:0035277)	22	1	2.235	-	1
regulation of response to DNA damage stimulus (GO:2001020)	22	1	2.235	-	1
female sex differentiation (GO:0046660)	22	2	2.235	-	1
larval midgut histolysis (GO:0035069)	22	2	2.235	-	1
ketone biosynthetic process (GO:0042181)	22	1	2.235	-	1
oocyte microtubule cytoskeleton polarization (GO:0008103)	22	5	2.235	+	1
visual behavior (GO:0007632)	22	2	2.235	-	1
visual perception (GO:0007601)	22	1	2.235	-	1
regulation of heart contraction (GO:0008016)	22	2	2.235	-	1
cell fate determination involved in pattern specification (GO:0060582)	22	3	2.235	+	1
membrane budding (GO:0006900)	22	6	2.235	+	1
regulation of MAP kinase activity (GO:0043405)	22	1	2.235	-	1
single fertilization (GO:0007338)	22	1	2.235	-	1
positive regulation of protein complex assembly (GO:0031334)	23	4	2.336	+	1
energy taxis (GO:0009453)	23	1	2.336	-	1
male courtship behavior, veined wing vibration (GO:0016545)	23	1	2.336	-	1
oxidoreduction coenzyme metabolic process (GO:0006733)	23	2	2.336	-	1
cuticle pigmentation (GO:0048067)	23	1	2.336	-	1
regulation of circadian sleep/wake cycle (GO:0042749)	23	1	2.336	-	1
phosphatidylinositol biosynthetic process (GO:0006661)	23	2	2.336	-	1
regulation of cell cycle G1/S phase transition (GO:1902806)	23	3	2.336	+	1
centriole replication (GO:0007099)	23	5	2.336	+	1
cytoplasmic microtubule organization (GO:0031122)	23	5	2.336	+	1
sister chromatid cohesion (GO:0007062)	23	2	2.336	-	1
cellular response to insulin stimulus (GO:0032869)	23	1	2.336	-	1
calcium-dependent cell-cell adhesion (GO:0016339)	23	1	2.336	-	1
GPI anchor metabolic process (GO:0006505)	23	2	2.336	-	1
regulation of histone modification (GO:0031056)	23	2	2.336	-	1
nucleobase metabolic process (GO:0009112)	23	2	2.336	-	1
cellular response to peptide hormone stimulus (GO:0071375)	23	1	2.336	-	1
organ growth (GO:0035265)	23	3	2.336	+	1
phototaxis (GO:0042331)	23	1	2.336	-	1
gene silencing by miRNA (GO:0035195)	23	2	2.336	-	1
cellular response to heat (GO:0034605)	23	1	2.336	-	1
positive regulation of multicellular organism growth (GO:0040018)	23	2	2.336	-	1
regulation of protein depolymerization (GO:1901879)	23	1	2.336	-	1
positive regulation of cytoskeleton organization (GO:0051495)	23	3	2.336	+	1
positive regulation of JAK-STAT cascade (GO:0046427)	23	1	2.336	-	1
cellular response to peptide (GO:1901653)	23	1	2.336	-	1
regulation of cysteine-type endopeptidase activity (GO:2000116)	23	5	2.336	+	1
pyrimidine-containing compound metabolic process (GO:0072527)	23	5	2.336	+	1
pyridine-containing compound metabolic process (GO:0072524)	23	1	2.336	-	1
regulation of G1/S transition of mitotic cell cycle (GO:2000045)	23	3	2.336	+	1
positive regulation of cell size (GO:0045793)	23	3	2.336	+	1
actin cytoskeleton reorganization (GO:0031532)	23	1	2.336	-	1
imaginal disc-derived genitalia development (GO:0007484)	23	1	2.336	-	1
positive regulation of antibacterial peptide biosynthetic process (GO:0006963)	23	1	2.336	-	1
centriole assembly (GO:0098534)	23	5	2.336	+	1
ectoderm development (GO:0007398)	23	2	2.336	-	1
fertilization (GO:0009566)	23	2	2.336	-	1
regulation of transcription factor import into nucleus (GO:0042990)	23	2	2.336	-	1
cortical actin cytoskeleton organization (GO:0030866)	24	1	2.438	-	1
regulation of developmental pigmentation (GO:0048070)	24	1	2.438	-	1
male courtship behavior, veined wing extension (GO:0048065)	24	1	2.438	-	1
karyosome formation (GO:0030717)	24	2	2.438	-	1
transition metal ion transport (GO:0000041)	24	2	2.438	-	1
nuclear migration (GO:0007097)	24	3	2.438	+	1
mitotic chromosome condensation (GO:0007076)	24	4	2.438	+	1
response to insulin (GO:0032868)	24	1	2.438	-	1
cellular response to transforming growth factor beta stimulus (GO:0071560)	24	3	2.438	+	1
response to transforming growth factor beta (GO:0071559)	24	3	2.438	+	1
establishment or maintenance of polarity of follicular epithelium (GO:0016334)	24	2	2.438	-	1
cell cycle DNA replication (GO:0044786)	24	3	2.438	+	1
regulation of membrane potential (GO:0042391)	24	1	2.438	-	1
peptidyl-proline modification (GO:0018208)	24	4	2.438	+	1
regulation of tube length, open tracheal system (GO:0035159)	24	3	2.438	+	1
regulation of filopodium assembly (GO:0051489)	24	1	2.438	-	1
epithelial cell morphogenesis (GO:0003382)	24	1	2.438	-	1
membrane docking (GO:0022406)	24	1	2.438	-	1
positive regulation of cell cycle process (GO:0090068)	24	3	2.438	+	1
response to peptide (GO:1901652)	24	1	2.438	-	1
response to ionizing radiation (GO:0010212)	24	1	2.438	-	1
trachea development (GO:0060438)	24	2	2.438	-	1
response to peptide hormone (GO:0043434)	24	1	2.438	-	1
pole cell migration (GO:0007280)	25	2	2.54	-	1
male meiosis cytokinesis (GO:0007112)	25	2	2.54	-	1
imaginal disc-derived leg segmentation (GO:0036011)	25	3	2.54	+	1
regulation of microtubule polymerization or depolymerization (GO:0031110)	25	1	2.54	-	1
positive regulation of apoptotic process (GO:0043065)	25	2	2.54	-	1
dsRNA transport (GO:0033227)	25	3	2.54	+	1
mitotic cell cycle phase transition (GO:0044772)	25	4	2.54	+	1
cellular response to hypoxia (GO:0071456)	25	2	2.54	-	1
mRNA export from nucleus (GO:0006406)	25	6	2.54	+	1
microtubule bundle formation (GO:0001578)	25	1	2.54	-	1
appendage segmentation (GO:0035285)	25	3	2.54	+	1
muscle cell cellular homeostasis (GO:0046716)	25	2	2.54	-	1
spindle localization (GO:0051653)	25	1	2.54	-	1
embryonic hemopoiesis (GO:0035162)	25	4	2.54	+	1
regulation of dendrite morphogenesis (GO:0048814)	25	1	2.54	-	1
glycolytic process (GO:0006096)	25	4	2.54	+	1
proximal/distal pattern formation (GO:0009954)	25	2	2.54	-	1
sensory perception of light stimulus (GO:0050953)	25	1	2.54	-	1
response to acid chemical (GO:0001101)	25	2	2.54	-	1
circadian sleep/wake cycle process (GO:0022410)	25	1	2.54	-	1
regulation of antibacterial peptide biosynthetic process (GO:0002808)	25	1	2.54	-	1
lymph gland development (GO:0048542)	25	4	2.54	+	1
protein stabilization (GO:0050821)	25	4	2.54	+	1
regulation of antibacterial peptide production (GO:0002786)	25	1	2.54	-	1
establishment of spindle localization (GO:0051293)	25	1	2.54	-	1
positive regulation of protein kinase activity (GO:0045860)	25	1	2.54	-	1
sensory organ boundary specification (GO:0008052)	25	3	2.54	+	1
negative regulation of neurogenesis (GO:0050768)	25	1	2.54	-	1
tracheal outgrowth, open tracheal system (GO:0007426)	25	4	2.54	+	1
positive regulation of kinase activity (GO:0033674)	25	1	2.54	-	1
regulation of hemocyte differentiation (GO:0045610)	25	1	2.54	-	1
response to reactive oxygen species (GO:0000302)	25	6	2.54	+	1
M phase (GO:0000279)	26	5	2.641	+	1
response to UV (GO:0009411)	26	1	2.641	-	1
germ-line cyst formation (GO:0048134)	26	2	2.641	-	1
regulation of neuron death (GO:1901214)	26	4	2.641	+	1
regulation of protein complex disassembly (GO:0043244)	26	2	2.641	-	1
circadian sleep/wake cycle (GO:0042745)	26	1	2.641	-	1
regulation of stem cell proliferation (GO:0072091)	26	1	2.641	-	1
glycolipid biosynthetic process (GO:0009247)	26	2	2.641	-	1
neuron remodeling (GO:0016322)	26	3	2.641	+	1
regulation of BMP signaling pathway (GO:0030510)	26	1	2.641	-	1
glutamine family amino acid metabolic process (GO:0009064)	26	2	2.641	-	1
gravitaxis (GO:0042332)	26	2	2.641	-	1
male sex differentiation (GO:0046661)	26	1	2.641	-	1
larval locomotory behavior (GO:0008345)	26	1	2.641	-	1
positive regulation of Ras GTPase activity (GO:0032320)	26	1	2.641	-	1
actin filament-based movement (GO:0030048)	26	1	2.641	-	1
cellular component disassembly (GO:0022411)	26	4	2.641	+	1
negative regulation of proteolysis (GO:0045861)	26	3	2.641	+	1
positive regulation of cellular component biogenesis (GO:0044089)	26	2	2.641	-	1
response to gravity (GO:0009629)	26	2	2.641	-	1
fatty acid oxidation (GO:0019395)	26	3	2.641	+	1
segment polarity determination (GO:0007367)	26	1	2.641	-	1
positive regulation of cell projection organization (GO:0031346)	27	1	2.743	-	1
regulation of oocyte development (GO:0060281)	27	4	2.743	+	1
regulation of embryonic pattern specification (GO:1902875)	27	4	2.743	+	1
sphingolipid metabolic process (GO:0006665)	27	1	2.743	-	1
biological phase (GO:0044848)	27	6	2.743	+	1
cellular response to oxygen levels (GO:0071453)	27	2	2.743	-	1
positive regulation of cell growth (GO:0030307)	27	4	2.743	+	1
nuclear-transcribed mRNA catabolic process (GO:0000956)	27	1	2.743	-	1
negative regulation of cell development (GO:0010721)	27	1	2.743	-	1
glycosaminoglycan metabolic process (GO:0030203)	27	2	2.743	-	1
cuticle pattern formation (GO:0035017)	27	1	2.743	-	1
cellular response to oxidative stress (GO:0034599)	27	3	2.743	+	1
lipid oxidation (GO:0034440)	27	3	2.743	+	1
cell cycle phase (GO:0022403)	27	6	2.743	+	1
positive regulation of transferase activity (GO:0051347)	27	1	2.743	-	1
negative regulation of innate immune response (GO:0045824)	27	6	2.743	+	1
sex determination (GO:0007530)	27	4	2.743	+	1
detection of visible light (GO:0009584)	27	1	2.743	-	1
cellular response to decreased oxygen levels (GO:0036294)	27	2	2.743	-	1
regulation of pole plasm oskar mRNA localization (GO:0007317)	27	4	2.743	+	1
ER to Golgi vesicle-mediated transport (GO:0006888)	28	2	2.844	-	1
pole cell development (GO:0007277)	28	2	2.844	-	1
JNK cascade (GO:0007254)	28	2	2.844	-	1
mitotic cell cycle, embryonic (GO:0045448)	28	4	2.844	+	1
reciprocal meiotic recombination (GO:0007131)	28	1	2.844	-	1
amine metabolic process (GO:0009308)	28	1	2.844	-	1
cellular biogenic amine metabolic process (GO:0006576)	28	1	2.844	-	1
ommatidial rotation (GO:0016318)	28	1	2.844	-	1
neuron maturation (GO:0042551)	28	3	2.844	+	1
establishment or maintenance of epithelial cell apical/basal polarity (GO:0045197)	28	2	2.844	-	1
head segmentation (GO:0035287)	28	1	2.844	-	1
nucleotide-excision repair (GO:0006289)	28	4	2.844	+	1
regulation of protein catabolic process (GO:0042176)	28	7	2.844	+	1
negative regulation of Wnt signaling pathway (GO:0030178)	28	2	2.844	-	1
regulation of cell adhesion (GO:0030155)	28	1	2.844	-	1
stress-activated MAPK cascade (GO:0051403)	28	2	2.844	-	1
cellular amine metabolic process (GO:0044106)	28	1	2.844	-	1
protein oligomerization (GO:0051259)	28	3	2.844	+	1
reciprocal DNA recombination (GO:0035825)	28	1	2.844	-	1
lipid transport (GO:0006869)	29	1	2.946	-	1
negative regulation of defense response (GO:0031348)	29	6	2.946	+	1
cortical cytoskeleton organization (GO:0030865)	29	1	2.946	-	1
response to alkaloid (GO:0043279)	29	1	2.946	-	1
oligosaccharide metabolic process (GO:0009311)	29	1	2.946	-	1
negative regulation of protein maturation (GO:1903318)	29	4	2.946	+	1
regulation of chromatin modification (GO:1903308)	29	3	2.946	+	1
establishment of imaginal disc-derived wing hair orientation (GO:0001737)	29	3	2.946	+	1
meiotic cytokinesis (GO:0033206)	29	2	2.946	-	1
cell cycle phase transition (GO:0044770)	29	4	2.946	+	1
negative regulation of protein processing (GO:0010955)	29	4	2.946	+	1
negative regulation of endopeptidase activity (GO:0010951)	29	2	2.946	-	1
cellular response to organonitrogen compound (GO:0071417)	29	3	2.946	+	1
fatty acid catabolic process (GO:0009062)	29	4	2.946	+	1
axon midline choice point recognition (GO:0016199)	29	1	2.946	-	1
septate junction assembly (GO:0019991)	29	3	2.946	+	1
positive regulation of intracellular protein transport (GO:0090316)	29	1	2.946	-	1
establishment of nucleus localization (GO:0040023)	29	3	2.946	+	1
negative regulation of cytoskeleton organization (GO:0051494)	29	1	2.946	-	1
glycerophospholipid biosynthetic process (GO:0046474)	29	2	2.946	-	1
negative regulation of peptidase activity (GO:0010466)	29	2	2.946	-	1
adherens junction organization (GO:0034332)	29	3	2.946	+	1
dicarboxylic acid metabolic process (GO:0043648)	29	1	2.946	-	1
hormone-mediated signaling pathway (GO:0009755)	29	1	2.946	-	1
regulation of imaginal disc growth (GO:0045570)	30	2	3.048	-	1
germarium-derived oocyte fate determination (GO:0007294)	30	2	3.048	-	1
regulation of actin filament polymerization (GO:0030833)	30	3	3.048	-	1
regulation of embryonic cell shape (GO:0016476)	30	1	3.048	-	1
stress-activated protein kinase signaling cascade (GO:0031098)	30	2	3.048	-	1
histone lysine methylation (GO:0034968)	30	6	3.048	+	1
regulation of defense response to bacterium (GO:1900424)	30	1	3.048	-	1
melanotic encapsulation of foreign target (GO:0035011)	30	3	3.048	-	1
regulation of Rab GTPase activity (GO:0032313)	30	2	3.048	-	1
membrane lipid biosynthetic process (GO:0046467)	30	2	3.048	-	1
positive regulation of antimicrobial peptide biosynthetic process (GO:0002807)	30	2	3.048	-	1
alpha-amino acid catabolic process (GO:1901606)	30	2	3.048	-	1
positive regulation of cellular amide metabolic process (GO:0034250)	30	2	3.048	-	1
positive regulation of cell cycle (GO:0045787)	30	3	3.048	-	1
positive regulation of GTPase activity (GO:0043547)	30	2	3.048	-	1
glial cell development (GO:0021782)	30	1	3.048	-	1
regulation of cell projection assembly (GO:0060491)	30	2	3.048	-	1
meiotic spindle organization (GO:0000212)	31	3	3.149	-	1
oocyte fate determination (GO:0030716)	31	2	3.149	-	1
mRNA 3'-end processing (GO:0031124)	31	4	3.149	+	1
RNA interference (GO:0016246)	31	2	3.149	-	1
macroautophagy (GO:0016236)	31	4	3.149	+	1
RNA export from nucleus (GO:0006405)	31	9	3.149	+	1
cellular amino acid catabolic process (GO:0009063)	31	2	3.149	-	1
cytokinetic process (GO:0032506)	31	2	3.149	-	1
genitalia development (GO:0048806)	31	1	3.149	-	1
glial cell migration (GO:0008347)	31	1	3.149	-	1
regulation of mitotic metaphase/anaphase transition (GO:0030071)	31	6	3.149	+	1
regulation of metaphase/anaphase transition of cell cycle (GO:1902099)	31	6	3.149	+	1
protein polymerization (GO:0051258)	31	5	3.149	+	1
response to toxic substance (GO:0009636)	31	1	3.149	-	1
monocarboxylic acid catabolic process (GO:0072329)	31	4	3.149	+	1
head development (GO:0060322)	31	2	3.149	-	1
DNA biosynthetic process (GO:0071897)	31	3	3.149	-	1
histone acetylation (GO:0016573)	32	4	3.251	+	1
eye pigment biosynthetic process (GO:0006726)	32	3	3.251	-	1
protein targeting to mitochondrion (GO:0006626)	32	6	3.251	+	1
regulation of smoothened signaling pathway (GO:0008589)	32	5	3.251	+	1
glycerolipid biosynthetic process (GO:0045017)	32	2	3.251	-	1
nucleic acid phosphodiester bond hydrolysis (GO:0090305)	32	5	3.251	+	1
regulation of chromatin organization (GO:1902275)	32	3	3.251	-	1
regulation of endocytosis (GO:0030100)	32	3	3.251	-	1
protein localization to mitochondrion (GO:0070585)	32	6	3.251	+	1
establishment of protein localization to mitochondrion (GO:0072655)	32	6	3.251	+	1
negative regulation of immune response (GO:0050777)	32	7	3.251	+	1
regulation of dendrite development (GO:0050773)	32	1	3.251	-	1
synaptic growth at neuromuscular junction (GO:0051124)	32	2	3.251	-	1
heart morphogenesis (GO:0003007)	32	3	3.251	-	1
pigment metabolic process involved in developmental pigmentation (GO:0043324)	33	3	3.352	-	1
homophilic cell adhesion (GO:0007156)	33	1	3.352	-	1
protein secretion (GO:0009306)	33	1	3.352	-	1
germarium-derived oocyte differentiation (GO:0030706)	33	3	3.352	-	1
glycolipid metabolic process (GO:0006664)	33	2	3.352	-	1
regulation of cell fate specification (GO:0042659)	33	1	3.352	-	1
lipid homeostasis (GO:0055088)	33	2	3.352	-	1
female meiosis chromosome segregation (GO:0016321)	33	4	3.352	+	1
eye pigment metabolic process (GO:0042441)	33	3	3.352	-	1
inorganic anion transport (GO:0015698)	33	1	3.352	-	1
regulation of G-protein coupled receptor protein signaling pathway (GO:0008277)	33	1	3.352	-	1
positive regulation of developmental growth (GO:0048639)	33	1	3.352	-	1
regulation of protein polymerization (GO:0032271)	33	3	3.352	-	1
feeding behavior (GO:0007631)	33	1	3.352	-	1
cell fate commitment involved in pattern specification (GO:0060581)	33	3	3.352	-	1
regulation of sequence-specific DNA binding transcription factor activity (GO:0051090)	33	3	3.352	-	1
pigment metabolic process involved in pigmentation (GO:0043474)	33	3	3.352	-	1
mRNA transport (GO:0051028)	33	6	3.352	+	1
positive regulation of cellular catabolic process (GO:0031331)	34	4	3.454	+	1
positive regulation of protein phosphorylation (GO:0001934)	34	2	3.454	-	1
smoothened signaling pathway (GO:0007224)	34	2	3.454	-	1
pole plasm oskar mRNA localization (GO:0045451)	34	7	3.454	+	1
negative regulation of ERBB signaling pathway (GO:1901185)	34	4	3.454	+	1
epidermal growth factor receptor signaling pathway (GO:0007173)	34	5	3.454	+	1
ERBB signaling pathway (GO:0038127)	34	5	3.454	+	1
internal protein amino acid acetylation (GO:0006475)	34	4	3.454	+	1
mRNA catabolic process (GO:0006402)	34	2	3.454	-	1
internal peptidyl-lysine acetylation (GO:0018393)	34	4	3.454	+	1
axon choice point recognition (GO:0016198)	34	1	3.454	-	1
sleep (GO:0030431)	34	2	3.454	-	1
regulation of protein import into nucleus (GO:0042306)	34	2	3.454	-	1
regulation of chromatin silencing (GO:0031935)	34	5	3.454	+	1
germ-line stem cell division (GO:0042078)	34	3	3.454	-	1
negative regulation of epidermal growth factor receptor signaling pathway (GO:0042059)	34	4	3.454	+	1
Toll signaling pathway (GO:0008063)	34	2	3.454	-	1
regulation of axonogenesis (GO:0050770)	34	1	3.454	-	1
midgut development (GO:0007494)	34	2	3.454	-	1
epithelial cell migration, open tracheal system (GO:0007427)	34	2	3.454	-	1
ovarian nurse cell to oocyte transport (GO:0007300)	35	4	3.555	+	1
regulation of actin filament length (GO:0030832)	35	3	3.555	-	1
MAPK cascade (GO:0000165)	35	2	3.555	-	1
protein ubiquitination involved in ubiquitin-dependent protein catabolic process (GO:0042787)	35	3	3.555	-	1
negative regulation of synapse assembly (GO:0051964)	35	2	3.555	-	1
negative regulation of nervous system development (GO:0051961)	35	2	3.555	-	1
microtubule-based transport (GO:0010970)	35	2	3.555	-	1
peptidyl-lysine acetylation (GO:0018394)	35	4	3.555	+	1
myofibril assembly (GO:0030239)	35	1	3.555	-	1
regulation of protein localization to nucleus (GO:1900180)	35	2	3.555	-	1
signal transduction by phosphorylation (GO:0023014)	35	2	3.555	-	1
torso signaling pathway (GO:0008293)	35	2	3.555	-	1
pyruvate metabolic process (GO:0006090)	35	5	3.555	+	1
regulation of cell fate commitment (GO:0010453)	35	1	3.555	-	1
negative regulation of synaptic growth at neuromuscular junction (GO:0045886)	35	2	3.555	-	1
regulation of actin polymerization or depolymerization (GO:0008064)	35	3	3.555	-	1
regulation of system process (GO:0044057)	35	2	3.555	-	1
negative regulation of protein modification process (GO:0031400)	35	2	3.555	-	1
histone methylation (GO:0016571)	36	8	3.657	+	1
formation of primary germ layer (GO:0001704)	36	1	3.657	-	1
morphogenesis of follicular epithelium (GO:0016333)	36	3	3.657	-	1
oocyte microtubule cytoskeleton organization (GO:0016325)	36	5	3.657	+	1
cellular response to growth factor stimulus (GO:0071363)	36	3	3.657	-	1
double-strand break repair (GO:0006302)	36	1	3.657	-	1
regulation of locomotion (GO:0040012)	36	2	3.657	-	1
rhabdomere development (GO:0042052)	36	3	3.657	-	1
alpha-amino acid biosynthetic process (GO:1901607)	36	5	3.657	+	1
positive regulation of ERK1 and ERK2 cascade (GO:0070374)	36	6	3.657	+	1
positive regulation of Notch signaling pathway (GO:0045747)	36	4	3.657	+	1
eye pigmentation (GO:0048069)	37	3	3.759	-	1
cytoskeleton-dependent intracellular transport (GO:0030705)	37	3	3.759	-	1
fatty acid biosynthetic process (GO:0006633)	37	4	3.759	+	1
protein acetylation (GO:0006473)	37	4	3.759	+	1
response to growth factor (GO:0070848)	37	3	3.759	-	1
regulation of chromosome organization (GO:0033044)	37	3	3.759	-	1
positive regulation of intracellular transport (GO:0032388)	37	3	3.759	-	1
periodic partitioning (GO:0007365)	37	1	3.759	-	1
glial cell differentiation (GO:0010001)	38	1	3.86	-	1
apical junction assembly (GO:0043297)	38	4	3.86	+	1
tissue homeostasis (GO:0001894)	38	2	3.86	-	1
single-organism carbohydrate catabolic process (GO:0044724)	38	5	3.86	+	1
regulation of hemocyte proliferation (GO:0035206)	38	3	3.86	-	1
carbohydrate biosynthetic process (GO:0016051)	38	1	3.86	-	1
regulation of Rab protein signal transduction (GO:0032483)	38	2	3.86	-	1
establishment or maintenance of apical/basal cell polarity (GO:0035088)	38	4	3.86	+	1
establishment or maintenance of bipolar cell polarity (GO:0061245)	38	4	3.86	+	1
regulation of microtubule cytoskeleton organization (GO:0070507)	38	4	3.86	+	1
negative regulation of hydrolase activity (GO:0051346)	38	3	3.86	-	1
regulation of cellular component movement (GO:0051270)	38	3	3.86	-	1
positive regulation of protein transport (GO:0051222)	38	2	3.86	-	1
regulation of DNA metabolic process (GO:0051052)	38	6	3.86	+	1
cellular metal ion homeostasis (GO:0006875)	39	2	3.962	-	1
gastrulation involving germ band extension (GO:0010004)	39	2	3.962	-	1
gastrulation with mouth forming first (GO:0001703)	39	2	3.962	-	1
secondary metabolite biosynthetic process (GO:0044550)	39	2	3.962	-	1
cellular ketone metabolic process (GO:0042180)	39	1	3.962	-	1
tricarboxylic acid cycle (GO:0006099)	39	3	3.962	-	1
head involution (GO:0008258)	39	6	3.962	+	1
regulation of transmembrane receptor protein serine/threonine kinase signaling pathway (GO:0090092)	39	1	3.962	-	1
regulation of ERK1 and ERK2 cascade (GO:0070372)	39	6	3.962	+	1
negative regulation of cell cycle (GO:0045786)	39	4	3.962	+	1
eye-antennal disc morphogenesis (GO:0007455)	39	1	3.962	-	1
formation of organ boundary (GO:0010160)	39	4	3.962	+	1
hexose metabolic process (GO:0019318)	39	2	3.962	-	1
regulation of protein maturation (GO:1903317)	40	7	4.063	+	1
protein import into nucleus (GO:0006606)	40	3	4.063	-	1
ATP hydrolysis coupled proton transport (GO:0015991)	40	7	4.063	+	1
energy coupled proton transmembrane transport, against electrochemical gradient (GO:0015988)	40	7	4.063	+	1
asymmetric neuroblast division (GO:0055059)	40	4	4.063	-	1
protein targeting to nucleus (GO:0044744)	40	3	4.063	-	1
tRNA aminoacylation for protein translation (GO:0006418)	40	5	4.063	+	1
RNA catabolic process (GO:0006401)	40	2	4.063	-	1
aerobic respiration (GO:0009060)	40	3	4.063	-	1
regulation of nucleocytoplasmic transport (GO:0046822)	40	2	4.063	-	1
single-organism nuclear import (GO:1902593)	40	3	4.063	-	1
positive regulation of innate immune response (GO:0045089)	40	7	4.063	+	1
regulation of Rho protein signal transduction (GO:0035023)	40	1	4.063	-	1
encapsulation of foreign target (GO:0035010)	40	4	4.063	-	1
regulation of protein processing (GO:0070613)	40	7	4.063	+	1
establishment of cell polarity (GO:0030010)	40	3	4.063	-	1
asymmetric protein localization (GO:0008105)	40	3	4.063	-	1
positive regulation of catabolic process (GO:0009896)	40	5	4.063	+	1
monocarboxylic acid biosynthetic process (GO:0072330)	40	4	4.063	-	1
pole plasm mRNA localization (GO:0019094)	41	8	4.165	+	1
single-organism membrane fusion (GO:0044801)	41	5	4.165	+	1
single organismal cell-cell adhesion (GO:0016337)	41	2	4.165	-	1
neuroblast division (GO:0055057)	41	4	4.165	-	1
tRNA aminoacylation (GO:0043039)	41	6	4.165	+	1
cellular response to radiation (GO:0071478)	41	1	4.165	-	1
larval behavior (GO:0030537)	41	1	4.165	-	1
carbohydrate catabolic process (GO:0016052)	41	5	4.165	+	1
DNA-dependent DNA replication (GO:0006261)	41	11	4.165	+	1
regulation of multicellular organism growth (GO:0040014)	41	3	4.165	-	1
cellular response to nitrogen compound (GO:1901699)	41	4	4.165	-	1
tRNA processing (GO:0008033)	41	11	4.165	+	1
neuronal stem cell division (GO:0036445)	41	4	4.165	-	1
nuclear import (GO:0051170)	41	4	4.165	-	1
regulation of protein serine/threonine kinase activity (GO:0071900)	41	6	4.165	+	1
negative regulation of translation (GO:0017148)	41	3	4.165	-	1
establishment or maintenance of microtubule cytoskeleton polarity (GO:0030951)	42	5	4.267	+	1
protein deubiquitination (GO:0016579)	42	9	4.267	+	1
amino acid activation (GO:0043038)	42	6	4.267	+	1
monosaccharide metabolic process (GO:0005996)	42	2	4.267	-	1
multicellular organismal homeostasis (GO:0048871)	42	2	4.267	-	1
regulation of antimicrobial peptide biosynthetic process (GO:0002805)	42	2	4.267	-	1
membrane fusion (GO:0061025)	42	5	4.267	+	1
regulation of cellular amide metabolic process (GO:0034248)	42	2	4.267	-	1
negative regulation of Notch signaling pathway (GO:0045746)	42	3	4.267	-	1
single organism cell adhesion (GO:0098602)	42	2	4.267	-	1
segment specification (GO:0007379)	42	2	4.267	-	1
pole plasm RNA localization (GO:0007316)	42	8	4.267	+	1
positive regulation of defense response (GO:0031349)	43	7	4.368	+	1
posttranscriptional gene silencing (GO:0016441)	43	3	4.368	-	1
SCF-dependent proteasomal ubiquitin-dependent protein catabolic process (GO:0031146)	43	6	4.368	+	1
positive regulation of programmed cell death (GO:0043068)	43	2	4.368	-	1
cellular response to organic cyclic compound (GO:0071407)	43	1	4.368	-	1
muscle attachment (GO:0016203)	43	2	4.368	-	1
posttranscriptional gene silencing by RNA (GO:0035194)	43	3	4.368	-	1
chromosome condensation (GO:0030261)	43	7	4.368	+	1
asymmetric cell division (GO:0008356)	43	3	4.368	-	1
melanization defense response (GO:0035006)	43	3	4.368	-	1
protein localization to nucleus (GO:0034504)	43	4	4.368	-	1
syncytium formation by plasma membrane fusion (GO:0000768)	43	3	4.368	-	1
sulfur compound biosynthetic process (GO:0044272)	43	6	4.368	+	1
regulation of JAK-STAT cascade (GO:0046425)	43	4	4.368	-	1
organic hydroxy compound biosynthetic process (GO:1901617)	43	1	4.368	-	1
regulation of antimicrobial peptide production (GO:0002784)	43	2	4.368	-	1
regulation of production of molecular mediator of immune response (GO:0002700)	43	2	4.368	-	1
positive regulation of immune response (GO:0050778)	43	7	4.368	+	1
myoblast fusion (GO:0007520)	43	3	4.368	-	1
syncytium formation (GO:0006949)	43	3	4.368	-	1
regulation of secretion (GO:0051046)	43	2	4.368	-	1
response to inorganic substance (GO:0010035)	44	4	4.47	-	1
RNA modification (GO:0009451)	44	11	4.47	+	1
cell-cell junction assembly (GO:0007043)	44	4	4.47	-	1
genital disc development (GO:0035215)	44	2	4.47	-	1
synaptic vesicle endocytosis (GO:0048488)	44	9	4.47	+	1
synaptic vesicle recycling (GO:0036465)	44	9	4.47	+	1
nuclear export (GO:0051168)	44	9	4.47	+	1
oocyte dorsal/ventral axis specification (GO:0007310)	44	3	4.47	-	1
establishment or maintenance of cytoskeleton polarity (GO:0030952)	45	5	4.571	+	1
R7 cell differentiation (GO:0045466)	45	3	4.571	-	1
regulation of microtubule-based process (GO:0032886)	45	6	4.571	+	1
phospholipid biosynthetic process (GO:0008654)	45	4	4.571	-	1
lipid localization (GO:0010876)	45	4	4.571	-	1
maintenance of protein location in cell (GO:0032507)	45	7	4.571	+	1
peptidyl-lysine modification (GO:0018205)	45	8	4.571	+	1
regulation of tube size, open tracheal system (GO:0035151)	45	4	4.571	-	1
germ cell migration (GO:0008354)	45	3	4.571	-	1
renal tubule morphogenesis (GO:0061333)	45	1	4.571	-	1
negative regulation of phosphorus metabolic process (GO:0010563)	45	1	4.571	-	1
myotube differentiation (GO:0014902)	45	3	4.571	-	1
cellular lipid catabolic process (GO:0044242)	45	4	4.571	-	1
negative regulation of phosphate metabolic process (GO:0045936)	45	1	4.571	-	1
regulation of protein stability (GO:0031647)	45	6	4.571	+	1
negative regulation of immune system process (GO:0002683)	45	8	4.571	+	1
Malpighian tubule morphogenesis (GO:0007443)	45	1	4.571	-	1
wing disc dorsal/ventral pattern formation (GO:0048190)	46	5	4.673	+	1
Notch signaling pathway (GO:0007219)	46	10	4.673	+	1
glutathione metabolic process (GO:0006749)	46	10	4.673	+	1
germ-line stem cell maintenance (GO:0030718)	46	4	4.673	-	1
striated muscle cell development (GO:0055002)	46	1	4.673	-	1
muscle cell development (GO:0055001)	46	1	4.673	-	1
protein methylation (GO:0006479)	46	9	4.673	+	1
dorsal appendage formation (GO:0046843)	46	6	4.673	+	1
synaptic vesicle exocytosis (GO:0016079)	46	3	4.673	-	1
cellular response to abiotic stimulus (GO:0071214)	46	1	4.673	-	1
chaeta morphogenesis (GO:0008407)	46	2	4.673	-	1
protein alkylation (GO:0008213)	46	9	4.673	+	1
cell junction assembly (GO:0034329)	46	4	4.673	-	1
organelle fusion (GO:0048284)	46	5	4.673	+	1
sperm individualization (GO:0007291)	47	6	4.775	+	1
transmembrane receptor protein serine/threonine kinase signaling pathway (GO:0007178)	47	1	4.775	-	1
gene silencing by RNA (GO:0031047)	47	6	4.775	+	1
coenzyme biosynthetic process (GO:0009108)	47	5	4.775	+	1
imaginal disc-derived wing margin morphogenesis (GO:0008587)	47	2	4.775	-	1
imaginal disc-derived wing vein morphogenesis (GO:0008586)	47	2	4.775	-	1
formation of anatomical boundary (GO:0048859)	47	5	4.775	+	1
intracellular mRNA localization involved in anterior/posterior axis specification (GO:0060811)	47	9	4.775	+	1
negative regulation of developmental growth (GO:0048640)	47	3	4.775	-	1
cellular carbohydrate metabolic process (GO:0044262)	47	1	4.775	-	1
hemopoiesis (GO:0030097)	47	4	4.775	-	1
cellular cation homeostasis (GO:0030003)	47	2	4.775	-	1
developmental cell growth (GO:0048588)	47	2	4.775	-	1
regulation of ERBB signaling pathway (GO:1901184)	48	4	4.876	-	1
regulation of circadian rhythm (GO:0042752)	48	1	4.876	-	1
[truncated: 741 more rows]

## Sheet: GO_cluster2
Term	Background frequency	Sample frequency	Expected	+/-	P-value
cellular macromolecule metabolic process (GO:0044260)	2294	524	300.7	+	2.659e-36
cellular metabolic process (GO:0044237)	3260	670	427.4	+	1.067e-34
RNA metabolic process (GO:0016070)	625	209	81.93	+	4.387e-31
nucleic acid metabolic process (GO:0090304)	996	279	130.6	+	1.087e-29
heterocycle metabolic process (GO:0046483)	1381	347	181	+	5.25e-29
cellular process (GO:0009987)	6003	1034	786.9	+	5.263e-29
nucleobase-containing compound metabolic process (GO:0006139)	1287	327	168.7	+	7.034e-28
cellular nitrogen compound metabolic process (GO:0034641)	1410	348	184.8	+	1.138e-27
cellular aromatic compound metabolic process (GO:0006725)	1415	348	185.5	+	2.173e-27
organic cyclic compound metabolic process (GO:1901360)	1484	358	194.5	+	8.972e-27
gene expression (GO:0010467)	886	242	116.1	+	9.772e-24
nitrogen compound metabolic process (GO:0006807)	1688	373	221.3	+	4.036e-21
RNA processing (GO:0006396)	363	130	47.59	+	6.888e-21
macromolecule metabolic process (GO:0043170)	2932	563	384.4	+	4.877e-20
primary metabolic process (GO:0044238)	3665	668	480.5	+	1.982e-19
metabolic process (GO:0008152)	4503	780	590.3	+	5.002e-18
organic substance metabolic process (GO:0071704)	3932	695	515.5	+	4.044e-17
cell cycle process (GO:0022402)	619	160	81.15	+	9.35e-13
single-organism cellular process (GO:0044763)	4797	790	628.8	+	1.889e-12
cell cycle (GO:0007049)	700	173	91.76	+	3.09e-12
establishment of localization in cell (GO:0051649)	608	155	79.7	+	8.215e-12
cellular localization (GO:0051641)	731	177	95.83	+	8.679e-12
mitotic cell cycle process (GO:1903047)	454	125	59.52	+	2.197e-11
ncRNA metabolic process (GO:0034660)	146	60	19.14	+	3.519e-11
mitotic cell cycle (GO:0000278)	508	134	66.59	+	5.448e-11
cellular component organization or biogenesis (GO:0071840)	2278	420	298.6	+	9.886e-11
mRNA metabolic process (GO:0016071)	273	87	35.79	+	1.294e-10
intracellular transport (GO:0046907)	451	122	59.12	+	1.469e-10
sensory perception of chemical stimulus (GO:0007606)	265	2	34.74	-	3.096e-10
cellular protein metabolic process (GO:0044267)	1368	277	179.3	+	3.299e-10
single-organism intracellular transport (GO:1902582)	377	106	49.42	+	6.313e-10
mRNA processing (GO:0006397)	248	80	32.51	+	6.822e-10
RNA splicing (GO:0008380)	203	70	26.61	+	9.865e-10
single-organism organelle organization (GO:1902589)	936	203	122.7	+	2.374e-09
organelle organization (GO:0006996)	1436	283	188.2	+	3.428e-09
biosynthetic process (GO:0009058)	1126	233	147.6	+	4.51e-09
RNA splicing, via transesterification reactions (GO:0000375)	194	66	25.43	+	7.613e-09
macromolecule modification (GO:0043412)	859	187	112.6	+	1.4e-08
sensory perception (GO:0007600)	352	9	46.14	-	1.59e-08
neurogenesis (GO:0022008)	1340	264	175.7	+	2.17e-08
mRNA splicing, via spliceosome (GO:0000398)	191	64	25.04	+	2.887e-08
RNA splicing, via transesterification reactions with bulged adenosine as nucleophile (GO:0000377)	191	64	25.04	+	2.887e-08
cellular biosynthetic process (GO:0044249)	1049	216	137.5	+	4.633e-08
cellular component organization (GO:0016043)	2221	396	291.2	+	5.711e-08
establishment of protein localization (GO:0045184)	300	85	39.33	+	8.437e-08
organic substance biosynthetic process (GO:1901576)	1077	219	141.2	+	9.954e-08
protein transport (GO:0015031)	291	83	38.15	+	1.028e-07
cytoplasmic transport (GO:0016482)	226	69	29.63	+	2.485e-07
neurological system process (GO:0050877)	496	22	65.02	-	2.774e-07
cell differentiation (GO:0030154)	2114	376	277.1	+	2.788e-07
system process (GO:0003008)	543	26	71.18	-	3.016e-07
macromolecule biosynthetic process (GO:0009059)	696	154	91.24	+	3.352e-07
ncRNA processing (GO:0034470)	97	40	12.72	+	5.178e-07
tRNA metabolic process (GO:0006399)	82	36	10.75	+	7.355e-07
cellular macromolecule biosynthetic process (GO:0034645)	687	151	90.06	+	7.784e-07
nervous system development (GO:0007399)	1490	279	195.3	+	8.865e-07
cellular developmental process (GO:0048869)	2174	379	285	+	2.435e-06
system development (GO:0048731)	2139	373	280.4	+	3.301e-06
protein localization (GO:0008104)	444	106	58.2	+	4.994e-06
cellular response to DNA damage stimulus (GO:0006974)	261	72	34.22	+	6.531e-06
cellular response to stress (GO:0033554)	437	104	57.29	+	8.135e-06
RNA modification (GO:0009451)	44	24	5.768	+	8.813e-06
ribonucleoprotein complex biogenesis (GO:0022613)	108	40	14.16	+	9.661e-06
macromolecule localization (GO:0033036)	574	127	75.25	+	1.241e-05
regulation of cell cycle (GO:0051726)	319	82	41.82	+	1.305e-05
cell division (GO:0051301)	466	108	61.09	+	1.609e-05
protein modification process (GO:0036211)	814	164	106.7	+	4.781e-05
cellular protein modification process (GO:0006464)	814	164	106.7	+	4.781e-05
mitotic nuclear division (GO:0007067)	192	56	25.17	+	5.044e-05
organelle fission (GO:0048285)	320	80	41.95	+	6.018e-05
single-organism metabolic process (GO:0044710)	1850	322	242.5	+	6.294e-05
multicellular organismal development (GO:0007275)	2686	443	352.1	+	6.931e-05
heterocycle biosynthetic process (GO:0018130)	380	90	49.82	+	9.88e-05
nuclear division (GO:0000280)	315	78	41.29	+	0.0001266
single-organism developmental process (GO:0044767)	3135	504	411	+	0.0001488
Golgi vesicle transport (GO:0048193)	76	30	9.963	+	0.0001673
single-organism process (GO:0044699)	6254	926	819.9	+	0.0002223
cellular macromolecule localization (GO:0070727)	343	82	44.96	+	0.0002482
developmental process (GO:0032502)	3158	504	414	+	0.0003654
cell cycle checkpoint (GO:0000075)	102	35	13.37	+	0.0004376
detection of stimulus (GO:0051606)	198	5	25.96	-	0.0004551
regulation of mitotic cell cycle (GO:0007346)	207	56	27.14	+	0.0005233
anatomical structure development (GO:0048856)	2849	459	373.5	+	0.0005547
ribosome biogenesis (GO:0042254)	72	28	9.439	+	0.0005569
cellular protein localization (GO:0034613)	283	70	37.1	+	0.0005611
cellular nitrogen compound biosynthetic process (GO:0044271)	374	86	49.03	+	0.0006108
organic cyclic compound biosynthetic process (GO:1901362)	417	93	54.67	+	0.0007786
negative regulation of mitotic cell cycle phase transition (GO:1901991)	106	35	13.9	+	0.001024
negative regulation of cell cycle phase transition (GO:1901988)	106	35	13.9	+	0.001024
regulation of cellular process (GO:0050794)	2753	442	360.9	+	0.001426
intracellular protein transport (GO:0006886)	209	55	27.4	+	0.001473
macromolecular complex subunit organization (GO:0043933)	674	134	88.36	+	0.00161
mitotic cell cycle checkpoint (GO:0007093)	90	31	11.8	+	0.001752
regulation of mitotic cell cycle phase transition (GO:1901990)	134	40	17.57	+	0.002127
regulation of cell cycle phase transition (GO:1901987)	134	40	17.57	+	0.002127
regulation of biological process (GO:0050789)	2975	471	390	+	0.002579
negative regulation of cell cycle process (GO:0010948)	112	35	14.68	+	0.003346
nucleobase-containing compound biosynthetic process (GO:0034654)	310	72	40.64	+	0.003417
spindle organization (GO:0007051)	244	60	31.99	+	0.004059
protein metabolic process (GO:0019538)	1877	313	246.1	+	0.004059
nuclear transport (GO:0051169)	85	29	11.14	+	0.004374
nucleocytoplasmic transport (GO:0006913)	85	29	11.14	+	0.004374
regulation of cell cycle process (GO:0010564)	185	49	24.25	+	0.004434
aromatic compound biosynthetic process (GO:0019438)	377	83	49.42	+	0.004713
positive regulation of response to stimulus (GO:0048584)	308	71	40.38	+	0.005077
vesicle-mediated transport (GO:0016192)	492	102	64.5	+	0.00525
ER to Golgi vesicle-mediated transport (GO:0006888)	28	15	3.671	+	0.005775
organic substance transport (GO:0071702)	476	99	62.4	+	0.006311
tRNA aminoacylation for protein translation (GO:0006418)	40	18	5.244	+	0.007817
cofactor metabolic process (GO:0051186)	74	26	9.701	+	0.007951
RNA biosynthetic process (GO:0032774)	174	46	22.81	+	0.008848
biological regulation (GO:0065007)	3233	502	423.8	+	0.008895
microtubule cytoskeleton organization (GO:0000226)	396	85	51.91	+	0.009119
positive regulation of biological process (GO:0048518)	933	170	122.3	+	0.01043
tRNA aminoacylation (GO:0043039)	41	18	5.375	+	0.0108
tRNA processing (GO:0008033)	41	18	5.375	+	0.0108
mitotic spindle organization (GO:0007052)	214	53	28.05	+	0.01166
DNA damage checkpoint (GO:0000077)	81	27	10.62	+	0.01349
amino acid activation (GO:0043038)	42	18	5.506	+	0.01477
transcription initiation from RNA polymerase II promoter (GO:0006367)	64	23	8.39	+	0.01786
DNA integrity checkpoint (GO:0031570)	84	27	11.01	+	0.02491
methylation (GO:0032259)	70	24	9.176	+	0.02503
transcription, DNA-templated (GO:0006351)	171	44	22.42	+	0.02534
RNA methylation (GO:0001510)	12	9	1.573	+	0.0316
DNA-dependent DNA replication (GO:0006261)	41	17	5.375	+	0.03717
transmembrane transport (GO:0055085)	426	29	55.85	-	0.03779
mitotic G2 DNA damage checkpoint (GO:0007095)	68	23	8.914	+	0.04421
G2 DNA damage checkpoint (GO:0031572)	68	23	8.914	+	0.04421
macromolecule methylation (GO:0043414)	59	21	7.734	+	0.04538
mitotic DNA damage checkpoint (GO:0044773)	73	24	9.57	+	0.04749
dorsal closure, amnioserosa morphology change (GO:0046664)	10	8	1.311	+	0.05407
G-protein coupled receptor signaling pathway (GO:0007186)	191	8	25.04	-	0.05424
mitotic G2/M transition checkpoint (GO:0044818)	69	23	9.045	+	0.05475
mitotic DNA integrity checkpoint (GO:0044774)	74	24	9.701	+	0.05827
sensory perception of smell (GO:0007608)	92	1	12.06	-	0.05859
single-organism membrane organization (GO:0044802)	109	31	14.29	+	0.06379
ion transport (GO:0006811)	387	26	50.73	-	0.06621
response to stress (GO:0006950)	942	166	123.5	+	0.07085
multi-multicellular organism process (GO:0044706)	122	3	15.99	-	0.07166
nucleosome assembly (GO:0006334)	136	4	17.83	-	0.07327
protein localization to organelle (GO:0033365)	131	35	17.17	+	0.07696
coenzyme metabolic process (GO:0006732)	66	22	8.652	+	0.07782
chromosome segregation (GO:0007059)	142	37	18.62	+	0.08102
spliceosomal complex assembly (GO:0000245)	17	10	2.229	+	0.08849
spindle assembly (GO:0051225)	81	25	10.62	+	0.08925
chromatin assembly or disassembly (GO:0006333)	147	5	19.27	-	0.09481
positive regulation of cellular process (GO:0048522)	822	147	107.8	+	0.09531
protein targeting (GO:0006605)	122	33	15.99	+	0.09605
DNA repair (GO:0006281)	117	32	15.34	+	0.09936
cofactor biosynthetic process (GO:0051188)	54	19	7.079	+	0.1154
establishment of protein localization to organelle (GO:0072594)	113	31	14.81	+	0.1192
chitin metabolic process (GO:0006030)	117	3	15.34	-	0.1234
transcription from RNA polymerase II promoter (GO:0006366)	98	28	12.85	+	0.1277
chromatin assembly (GO:0031497)	144	5	18.88	-	0.1279
regulation of metabolic process (GO:0019222)	1492	245	195.6	+	0.1313
protein secretion (GO:0009306)	33	14	4.326	+	0.133
chromatin modification (GO:0016568)	135	35	17.7	+	0.1346
DNA metabolic process (GO:0006259)	399	80	52.31	+	0.1429
endomembrane system organization (GO:0010256)	109	30	14.29	+	0.143
DNA recombination (GO:0006310)	55	19	7.21	+	0.145
DNA-templated transcription, initiation (GO:0006352)	74	23	9.701	+	0.1488
regulation of MAPK cascade (GO:0043408)	99	28	12.98	+	0.1501
regulation of macromolecule metabolic process (GO:0060255)	1255	210	164.5	+	0.1514
carbohydrate derivative biosynthetic process (GO:1901137)	197	46	25.83	+	0.1537
small GTPase mediated signal transduction (GO:0007264)	120	32	15.73	+	0.1544
detection of stimulus involved in sensory perception (GO:0050906)	84	1	11.01	-	0.1548
microtubule-based process (GO:0007017)	501	96	65.68	+	0.1627
cytoskeleton organization (GO:0007010)	605	112	79.31	+	0.1807
retrograde vesicle-mediated transport, Golgi to ER (GO:0006890)	9	7	1.18	+	0.1807
ribonucleoprotein complex subunit organization (GO:0071826)	47	17	6.161	+	0.1841
mating (GO:0007618)	127	4	16.65	-	0.1861
endosomal transport (GO:0016197)	66	21	8.652	+	0.2044
mesoderm development (GO:0007498)	97	2	12.72	-	0.2207
regulation of phosphorylation (GO:0042325)	172	41	22.55	+	0.2217
histone modification (GO:0016570)	97	27	12.72	+	0.2466
covalent chromatin modification (GO:0016569)	97	27	12.72	+	0.2466
cytokinesis (GO:0000910)	97	27	12.72	+	0.2466
protein import (GO:0017038)	53	18	6.948	+	0.2579
regulation of cellular metabolic process (GO:0031323)	1324	218	173.6	+	0.2701
microtubule cytoskeleton organization involved in mitosis (GO:1902850)	49	17	6.424	+	0.2942
promoter clearance from RNA polymerase II promoter (GO:0001111)	7	6	0.9176	+	0.3035
promoter clearance during DNA-templated transcription (GO:0001109)	7	6	0.9176	+	0.3035
DNA replication initiation (GO:0006270)	13	8	1.704	+	0.3133
rRNA processing (GO:0006364)	36	14	4.719	+	0.3149
chromosome organization (GO:0051276)	448	86	58.73	+	0.3235
regulation of programmed cell death (GO:0043067)	153	37	20.06	+	0.3295
multi-organism behavior (GO:0051705)	170	8	22.29	-	0.3614
DNA replication (GO:0006260)	79	23	10.36	+	0.3646
regulation of apoptotic process (GO:0042981)	132	33	17.3	+	0.3778
tRNA modification (GO:0006400)	17	9	2.229	+	0.4083
aminoglycan metabolic process (GO:0006022)	144	6	18.88	-	0.4335
Rab protein signal transduction (GO:0032482)	33	13	4.326	+	0.4444
multicellular organismal reproductive behavior (GO:0033057)	105	3	13.76	-	0.4447
single-organism biosynthetic process (GO:0044711)	485	91	63.58	+	0.4527
behavior (GO:0007610)	521	43	68.3	-	0.4611
organonitrogen compound biosynthetic process (GO:1901566)	214	47	28.05	+	0.485
positive regulation of signal transduction (GO:0009967)	232	50	30.41	+	0.4977
cytoskeleton-dependent cytokinesis (GO:0061640)	81	23	10.62	+	0.5083
sensory perception of taste (GO:0050909)	74	1	9.701	-	0.515
coenzyme biosynthetic process (GO:0009108)	47	16	6.161	+	0.5255
spindle assembly involved in mitosis (GO:0090307)	47	16	6.161	+	0.5255
rRNA metabolic process (GO:0016072)	38	14	4.982	+	0.5297
positive regulation of signaling (GO:0023056)	240	51	31.46	+	0.598
chromosome condensation (GO:0030261)	43	15	5.637	+	0.5995
regulation of primary metabolic process (GO:0080090)	1248	204	163.6	+	0.6019
protein deacylation (GO:0035601)	8	6	1.049	+	0.6059
macromolecule deacylation (GO:0098732)	8	6	1.049	+	0.6059
membrane lipid biosynthetic process (GO:0046467)	30	12	3.933	+	0.6263
positive regulation of cell communication (GO:0010647)	247	52	32.38	+	0.6528
glycolipid biosynthetic process (GO:0009247)	26	11	3.408	+	0.6538
cell death (GO:0008219)	188	42	24.65	+	0.6666
regulation of ERK1 and ERK2 cascade (GO:0070372)	39	14	5.113	+	0.677
regulation of response to stress (GO:0080134)	194	43	25.43	+	0.6776
apoptotic process (GO:0006915)	83	23	10.88	+	0.699
Ras protein signal transduction (GO:0007265)	78	22	10.23	+	0.7161
cellular component biogenesis (GO:0044085)	769	133	100.8	+	0.7216
phosphorus metabolic process (GO:0006793)	749	130	98.19	+	0.7232
meiotic cell cycle process (GO:1903046)	138	33	18.09	+	0.7843
programmed cell death (GO:0012501)	184	41	24.12	+	0.7998
phosphate-containing compound metabolic process (GO:0006796)	738	128	96.75	+	0.8103
mating behavior (GO:0007617)	112	4	14.68	-	0.8448
meiotic cell cycle (GO:0051321)	173	39	22.68	+	0.8518
protein import into nucleus (GO:0006606)	40	14	5.244	+	0.8574
protein targeting to nucleus (GO:0044744)	40	14	5.244	+	0.8574
single-organism nuclear import (GO:1902593)	40	14	5.244	+	0.8574
anaphase (GO:0051322)	19	9	2.491	+	0.8834
nucleosome organization (GO:0034728)	148	7	19.4	-	0.8912
oxidoreduction coenzyme metabolic process (GO:0006733)	23	10	3.015	+	0.9073
reproductive behavior (GO:0019098)	123	5	16.12	-	0.9811
death (GO:0016265)	192	42	25.17	+	0.9851
TMP metabolic process (GO:0046044)	1	1	0.1311	+	1
RNA (guanine-N7)-methylation (GO:0036265)	1	1	0.1311	+	1
maintenance of mitotic sister chromatid cohesion (GO:0034088)	1	1	0.1311	+	1
maintenance of sister chromatid cohesion (GO:0034086)	1	1	0.1311	+	1
Golgi vesicle fusion to target membrane (GO:0048210)	1	1	0.1311	+	1
AMP metabolic process (GO:0046033)	1	1	0.1311	+	1
protein glycosylation in endoplasmic reticulum (GO:0033577)	1	1	0.1311	+	1
spliceosomal tri-snRNP complex assembly (GO:0000244)	1	1	0.1311	+	1
Golgi vesicle budding (GO:0048194)	1	1	0.1311	+	1
gamma-aminobutyric acid catabolic process (GO:0009450)	1	1	0.1311	+	1
JUN phosphorylation (GO:0007258)	1	1	0.1311	+	1
beta-amyloid metabolic process (GO:0050435)	1	1	0.1311	+	1
nuclear membrane organization (GO:0071763)	1	1	0.1311	+	1
heme oxidation (GO:0006788)	1	1	0.1311	+	1
porphyrin-containing compound catabolic process (GO:0006787)	1	1	0.1311	+	1
heme a biosynthetic process (GO:0006784)	1	1	0.1311	+	1
thiamine metabolic process (GO:0006772)	1	1	0.1311	+	1
lipoamide metabolic process (GO:0006748)	1	1	0.1311	+	1
cholesterol catabolic process (GO:0006707)	1	1	0.1311	+	1
positive regulation of nitric oxide biosynthetic process (GO:0045429)	1	1	0.1311	+	1
regulation of nitric oxide biosynthetic process (GO:0045428)	1	1	0.1311	+	1
maintenance of blood-brain barrier (GO:0035633)	1	1	0.1311	+	1
histone H2B conserved C-terminal lysine deubiquitination (GO:0035616)	1	1	0.1311	+	1
tRNA transcription from RNA polymerase III promoter (GO:0042797)	1	1	0.1311	+	1
posttranslational protein targeting to membrane, translocation (GO:0031204)	1	1	0.1311	+	1
DNA damage response, signal transduction resulting in transcription (GO:0042772)	1	1	0.1311	+	1
ribonucleoprotein complex disassembly (GO:0032988)	1	1	0.1311	+	1
meiotic recombination nodule assembly (GO:0007146)	1	1	0.1311	+	1
tRNA transcription (GO:0009304)	1	1	0.1311	+	1
thiamine-containing compound metabolic process (GO:0042723)	1	1	0.1311	+	1
membrane addition at site of cytokinesis (GO:0007107)	1	1	0.1311	+	1
cholesterol biosynthetic process (GO:0006695)	1	1	0.1311	+	1
leukotriene metabolic process (GO:0006691)	1	1	0.1311	+	1
somatic cell DNA recombination (GO:0016444)	1	1	0.1311	+	1
posttranslational protein targeting to membrane (GO:0006620)	1	1	0.1311	+	1
SRP-dependent cotranslational protein targeting to membrane, signal sequence recognition (GO:0006617)	1	1	0.1311	+	1
N-terminal peptidyl-proline methylation (GO:0035568)	1	1	0.1311	+	1
farnesyl diphosphate metabolic process (GO:0045338)	1	1	0.1311	+	1
farnesyl diphosphate biosynthetic process (GO:0045337)	1	1	0.1311	+	1
negative regulation of I-kappaB kinase/NF-kappaB signaling (GO:0043124)	1	1	0.1311	+	1
histone H2A monoubiquitination (GO:0035518)	1	1	0.1311	+	1
viral genome replication (GO:0019079)	1	1	0.1311	+	1
meiotic spindle assembly checkpoint (GO:0033316)	1	1	0.1311	+	1
mitotic chromosome movement towards spindle pole (GO:0007079)	1	1	0.1311	+	1
thiamine diphosphate biosynthetic process (GO:0009229)	1	1	0.1311	+	1
post-chaperonin tubulin folding pathway (GO:0007023)	1	1	0.1311	+	1
protein ufmylation (GO:0071569)	1	1	0.1311	+	1
regulation of steroid hormone secretion (GO:2000831)	1	1	0.1311	+	1
polyamine catabolic process (GO:0006598)	1	1	0.1311	+	1
negative regulation of chromosome segregation (GO:0051985)	1	1	0.1311	+	1
negative regulation of lamellipodium organization (GO:1902744)	1	1	0.1311	+	1
S-adenosylmethionine biosynthetic process (GO:0006556)	1	1	0.1311	+	1
meiotic metaphase I plate congression (GO:0043060)	1	1	0.1311	+	1
tRNA wobble position uridine thiolation (GO:0002143)	1	1	0.1311	+	1
DNA methylation involved in embryo development (GO:0043045)	1	1	0.1311	+	1
folic acid transport (GO:0015884)	1	1	0.1311	+	1
negative regulation of cellular amine metabolic process (GO:0033239)	1	1	0.1311	+	1
positive regulation of apoptotic signaling pathway (GO:2001235)	1	1	0.1311	+	1
histone-serine phosphorylation (GO:0035404)	1	1	0.1311	+	1
pyrimidine deoxyribonucleoside diphosphate biosynthetic process (GO:0009197)	1	1	0.1311	+	1
pyrimidine deoxyribonucleoside diphosphate metabolic process (GO:0009196)	1	1	0.1311	+	1
deoxyribonucleoside diphosphate biosynthetic process (GO:0009189)	1	1	0.1311	+	1
myosin II filament organization (GO:0031038)	1	1	0.1311	+	1
myosin II filament assembly (GO:0031036)	1	1	0.1311	+	1
interphase microtubule organizing center assembly (GO:0031024)	1	1	0.1311	+	1
meiotic spindle checkpoint (GO:0044779)	1	1	0.1311	+	1
pyrimidine nucleoside diphosphate biosynthetic process (GO:0009139)	1	1	0.1311	+	1
pyrimidine nucleoside diphosphate metabolic process (GO:0009138)	1	1	0.1311	+	1
mature miRNA 3'-end processing (GO:0044747)	1	1	0.1311	+	1
negative regulation of monooxygenase activity (GO:0032769)	1	1	0.1311	+	1
ubiquitin homeostasis (GO:0010992)	1	1	0.1311	+	1
protein localization to chromosome, centromeric region (GO:0071459)	1	1	0.1311	+	1
N-terminal protein myristoylation (GO:0006499)	1	1	0.1311	+	1
C-terminal protein methylation (GO:0006481)	1	1	0.1311	+	1
N-terminal protein amino acid methylation (GO:0006480)	1	1	0.1311	+	1
N-terminal protein amino acid acetylation (GO:0006474)	1	1	0.1311	+	1
regulation of necrotic cell death (GO:0010939)	1	1	0.1311	+	1
lysyl-tRNA aminoacylation (GO:0006430)	1	1	0.1311	+	1
response to hydroperoxide (GO:0033194)	1	1	0.1311	+	1
left/right axis specification (GO:0070986)	1	1	0.1311	+	1
epiboly involved in wound healing (GO:0090505)	1	1	0.1311	+	1
epiboly (GO:0090504)	1	1	0.1311	+	1
dephosphorylation of RNA polymerase II C-terminal domain (GO:0070940)	1	1	0.1311	+	1
imaginal disc-derived wing hair outgrowth (GO:0035318)	1	1	0.1311	+	1
wound healing, spreading of epidermal cells (GO:0035313)	1	1	0.1311	+	1
nuclear migration along microtubule (GO:0030473)	1	1	0.1311	+	1
protein myristoylation (GO:0018377)	1	1	0.1311	+	1
negative regulation of sequestering of triglyceride (GO:0010891)	1	1	0.1311	+	1
synaptic vesicle to endosome fusion (GO:0016189)	1	1	0.1311	+	1
termination of mitochondrial transcription (GO:0006393)	1	1	0.1311	+	1
protein farnesylation (GO:0018343)	1	1	0.1311	+	1
response to redox state (GO:0051775)	1	1	0.1311	+	1
negative regulation of mRNA polyadenylation (GO:1900364)	1	1	0.1311	+	1
regulation of mRNA polyadenylation (GO:1900363)	1	1	0.1311	+	1
sterol catabolic process (GO:0016127)	1	1	0.1311	+	1
DNA-templated transcriptional preinitiation complex assembly (GO:0070897)	1	1	0.1311	+	1
mitotic recombination (GO:0006312)	1	1	0.1311	+	1
protein localization to nuclear envelope (GO:0090435)	1	1	0.1311	+	1
magnesium ion transport (GO:0015693)	1	1	0.1311	+	1
intracellular copper ion transport (GO:0015680)	1	1	0.1311	+	1
negative regulation of sister chromatid segregation (GO:0033046)	1	1	0.1311	+	1
chromatin maintenance (GO:0070827)	1	1	0.1311	+	1
tetrapyrrole catabolic process (GO:0033015)	1	1	0.1311	+	1
histone H4-K20 dimethylation (GO:0034772)	1	1	0.1311	+	1
histone H4-K20 monomethylation (GO:0034771)	1	1	0.1311	+	1
thiamine diphosphate metabolic process (GO:0042357)	1	1	0.1311	+	1
meiotic DNA double-strand break formation involved in reciprocal meiotic recombination (GO:0010780)	1	1	0.1311	+	1
establishment of ER localization (GO:0051686)	1	1	0.1311	+	1
protein O-linked glycosylation via threonine (GO:0018243)	1	1	0.1311	+	1
positive regulation of stem cell maintenance (GO:1902459)	1	1	0.1311	+	1
phagosome acidification (GO:0090383)	1	1	0.1311	+	1
peptidyl-methionine modification (GO:0018206)	1	1	0.1311	+	1
dTDP biosynthetic process (GO:0006233)	1	1	0.1311	+	1
dTMP biosynthetic process (GO:0006231)	1	1	0.1311	+	1
TMP biosynthetic process (GO:0006230)	1	1	0.1311	+	1
charged-tRNA amino acid modification (GO:0019988)	1	1	0.1311	+	1
negative regulation of meiotic cell cycle phase transition (GO:1901994)	1	1	0.1311	+	1
regulation of meiotic cell cycle phase transition (GO:1901993)	1	1	0.1311	+	1
left/right pattern formation (GO:0060972)	1	1	0.1311	+	1
protein O-GlcNAcylation via threonine (GO:0097370)	1	1	0.1311	+	1
age-dependent response to reactive oxygen species (GO:0001315)	1	1	0.1311	+	1
protein nucleotidylation (GO:0018175)	1	1	0.1311	+	1
peptidyl-pyrromethane cofactor linkage (GO:0018160)	1	1	0.1311	+	1
histone H3-S10 phosphorylation (GO:0043987)	1	1	0.1311	+	1
regulation of Wnt signaling pathway by Wnt protein secretion (GO:0061359)	1	1	0.1311	+	1
Wnt protein secretion (GO:0061355)	1	1	0.1311	+	1
heparin biosynthetic process (GO:0030210)	1	1	0.1311	+	1
heparin metabolic process (GO:0030202)	1	1	0.1311	+	1
AMP biosynthetic process (GO:0006167)	1	1	0.1311	+	1
protein adenylylation (GO:0018117)	1	1	0.1311	+	1
negative regulation of epithelial cell migration (GO:0010633)	1	1	0.1311	+	1
positive regulation of transcription involved in G2/M transition of mitotic cell cycle (GO:0090282)	1	1	0.1311	+	1
peptidyl-threonine phosphorylation (GO:0018107)	1	1	0.1311	+	1
guanine catabolic process (GO:0006147)	1	1	0.1311	+	1
purine nucleobase catabolic process (GO:0006145)	1	1	0.1311	+	1
negative regulation of endoplasmic reticulum unfolded protein response (GO:1900102)	1	1	0.1311	+	1
regulation of endoplasmic reticulum unfolded protein response (GO:1900101)	1	1	0.1311	+	1
late meiotic recombination nodule assembly (GO:0042140)	1	1	0.1311	+	1
wound healing, spreading of cells (GO:0044319)	1	1	0.1311	+	1
early meiotic recombination nodule assembly (GO:0042139)	1	1	0.1311	+	1
negative regulation of lamellipodium assembly (GO:0010593)	1	1	0.1311	+	1
negative regulation of stress fiber assembly (GO:0051497)	1	1	0.1311	+	1
peptidyl-lysine monomethylation (GO:0018026)	1	1	0.1311	+	1
N-terminal peptidyl-proline dimethylation (GO:0018016)	1	1	0.1311	+	1
UDP-N-acetylglucosamine biosynthetic process (GO:0006048)	1	1	0.1311	+	1
UDP-N-acetylglucosamine metabolic process (GO:0006047)	1	1	0.1311	+	1
estrogen metabolic process (GO:0008210)	1	1	0.1311	+	1
DNA recombinase assembly (GO:0000730)	1	1	0.1311	+	1
androgen metabolic process (GO:0008209)	1	1	0.1311	+	1
meiotic DNA recombinase assembly (GO:0000707)	1	1	0.1311	+	1
regulation of nitric-oxide synthase activity (GO:0050999)	1	1	0.1311	+	1
deoxyhypusine biosynthetic process from spermidine (GO:0050983)	1	1	0.1311	+	1
protein K63-linked ubiquitination (GO:0070534)	1	1	0.1311	+	1
proximal/distal axis specification (GO:0009946)	1	1	0.1311	+	1
negative regulation of histone H4-K20 methylation (GO:0070511)	1	1	0.1311	+	1
regulation of histone H4-K20 methylation (GO:0070510)	1	1	0.1311	+	1
transcriptional start site selection at RNA polymerase II promoter (GO:0001174)	1	1	0.1311	+	1
DNA-templated transcriptional start site selection (GO:0001173)	1	1	0.1311	+	1
U6 snRNA 3'-end processing (GO:0034477)	1	1	0.1311	+	1
endoplasmic reticulum-Golgi intermediate compartment organization (GO:0097111)	1	1	0.1311	+	1
regulation of DNA biosynthetic process (GO:2000278)	1	1	0.1311	+	1
negative regulation of actin filament bundle assembly (GO:0032232)	1	1	0.1311	+	1
negative regulation of dopamine metabolic process (GO:0045963)	1	1	0.1311	+	1
negative regulation of oxidoreductase activity (GO:0051354)	1	1	0.1311	+	1
negative regulation of catecholamine metabolic process (GO:0045914)	1	1	0.1311	+	1
meiotic metaphase plate congression (GO:0051311)	1	1	0.1311	+	1
negative regulation of metaphase/anaphase transition of meiotic cell cycle (GO:1902103)	1	1	0.1311	+	1
regulation of metaphase/anaphase transition of meiotic cell cycle (GO:1902102)	1	1	0.1311	+	1
positive regulation of compound eye retinal cell apoptotic process (GO:1901694)	1	1	0.1311	+	1
selenocysteinyl-tRNA(Sec) biosynthetic process (GO:0097056)	1	1	0.1311	+	1
histone H3-K14 acetylation (GO:0044154)	1	1	0.1311	+	1
regulation of peptidyl-cysteine S-nitrosylation (GO:2000169)	1	1	0.1311	+	1
histone monoubiquitination (GO:0010390)	1	1	0.1311	+	1
endodermal digestive tract morphogenesis (GO:0061031)	1	1	0.1311	+	1
regulation of nitric oxide metabolic process (GO:0080164)	1	1	0.1311	+	1
negative regulation of necrotic cell death (GO:0060547)	1	1	0.1311	+	1
regulation of ecdysteroid secretion (GO:0007555)	1	1	0.1311	+	1
changes to DNA methylation involved in embryo development (GO:1901538)	1	1	0.1311	+	1
positive regulation of transcription from RNA polymerase II promoter involved in cellular response to chemical stimulus (GO:1901522)	1	1	0.1311	+	1
synaptic vesicle recycling via endosome (GO:0036466)	1	1	0.1311	+	1
spermidine catabolic process (GO:0046203)	1	1	0.1311	+	1
regulation of stem cell maintenance (GO:2000036)	1	1	0.1311	+	1
negative regulation of cyclin-dependent protein serine/threonine kinase activity (GO:0045736)	1	1	0.1311	+	1
RNA polymerase II transcriptional preinitiation complex assembly (GO:0051123)	1	1	0.1311	+	1
heme a metabolic process (GO:0046160)	1	1	0.1311	+	1
conversion of methionyl-tRNA to N-formyl-methionyl-tRNA (GO:0071951)	1	1	0.1311	+	1
positive regulation of transcription from RNA polymerase II promoter involved in unfolded protein response (GO:0006990)	1	1	0.1311	+	1
response to lipid hydroperoxide (GO:0006982)	1	1	0.1311	+	1
DNA damage response, signal transduction by p53 class mediator resulting in transcription of p21 class mediator (GO:0006978)	1	1	0.1311	+	1
spliceosomal complex disassembly (GO:0000390)	1	1	0.1311	+	1
tRNA-type intron splice site recognition and cleavage (GO:0000379)	1	1	0.1311	+	1
dihydropteridine metabolic process (GO:0051067)	1	1	0.1311	+	1
negative regulation of nitric-oxide synthase activity (GO:0051001)	1	1	0.1311	+	1
leukotriene biosynthetic process (GO:0019370)	1	1	0.1311	+	1
N-terminal peptidyl-methionine acetylation (GO:0017196)	1	1	0.1311	+	1
amyloid precursor protein catabolic process (GO:0042987)	1	1	0.1311	+	1
vesicle fusion with Golgi apparatus (GO:0048280)	1	1	0.1311	+	1
guanine metabolic process (GO:0046098)	1	1	0.1311	+	1
glutaredoxin biosynthetic process (GO:0042965)	1	1	0.1311	+	1
regulation of preblastoderm mitotic cell cycle (GO:0007347)	1	1	0.1311	+	1
dTMP metabolic process (GO:0046073)	1	1	0.1311	+	1
dTDP metabolic process (GO:0046072)	1	1	0.1311	+	1
GMP metabolic process (GO:0046037)	2	1	0.2622	+	1
multivesicular body assembly (GO:0036258)	2	1	0.2622	+	1
astral microtubule nucleation (GO:0030954)	2	1	0.2622	+	1
acyl carnitine transport (GO:0006844)	2	1	0.2622	+	1
deadenylation-dependent decapping of nuclear-transcribed mRNA (GO:0000290)	2	1	0.2622	+	1
regulation of transcription from RNA polymerase II promoter in response to DNA damage (GO:1990248)	2	1	0.2622	+	1
mitochondrial fission (GO:0000266)	2	1	0.2622	+	1
meiotic chromosome condensation (GO:0010032)	2	1	0.2622	+	1
unsaturated fatty acid metabolic process (GO:0033559)	2	1	0.2622	+	1
histone H2A ubiquitination (GO:0033522)	2	1	0.2622	+	1
medulla oblongata development (GO:0021550)	2	1	0.2622	+	1
respiratory chain complex III assembly (GO:0017062)	2	1	0.2622	+	1
positive regulation of transcription initiation from RNA polymerase II promoter (GO:0060261)	2	1	0.2622	+	1
germarium-derived cystoblast division (GO:0048142)	2	1	0.2622	+	1
establishment of thoracic bristle planar orientation (GO:0048106)	2	1	0.2622	+	1
negative regulation of actin filament depolymerization (GO:0030835)	2	2	0.2622	+	1
regulation of actin filament depolymerization (GO:0030834)	2	2	0.2622	+	1
riboflavin metabolic process (GO:0006771)	2	1	0.2622	+	1
R8 cell-mediated photoreceptor organization (GO:0045470)	2	1	0.2622	+	1
steroid catabolic process (GO:0006706)	2	1	0.2622	+	1
regulation of transcription involved in G2/M transition of mitotic cell cycle (GO:0000117)	2	1	0.2622	+	1
activation of adenylate cyclase activity (GO:0007190)	2	1	0.2622	+	1
receptor recycling (GO:0001881)	2	1	0.2622	+	1
male somatic sex determination (GO:0019102)	2	1	0.2622	+	1
very long-chain fatty acid catabolic process (GO:0042760)	2	1	0.2622	+	1
meiotic anaphase I (GO:0007133)	2	1	0.2622	+	1
flavin-containing compound biosynthetic process (GO:0042727)	2	1	0.2622	+	1
flavin-containing compound metabolic process (GO:0042726)	2	1	0.2622	+	1
negative regulation of transcription from RNA polymerase III promoter (GO:0016480)	2	1	0.2622	+	1
icosanoid metabolic process (GO:0006690)	2	1	0.2622	+	1
unsaturated fatty acid biosynthetic process (GO:0006636)	2	1	0.2622	+	1
mitotic anaphase B (GO:0000092)	2	1	0.2622	+	1
protein processing involved in protein targeting to mitochondrion (GO:0006627)	2	1	0.2622	+	1
mitotic metaphase (GO:0000089)	2	1	0.2622	+	1
ribosomal large subunit export from nucleus (GO:0000055)	2	2	0.2622	+	1
ribosomal subunit export from nucleus (GO:0000054)	2	2	0.2622	+	1
positive regulation of SNARE complex disassembly (GO:0035540)	2	1	0.2622	+	1
regulation of I-kappaB kinase/NF-kappaB signaling (GO:0043122)	2	1	0.2622	+	1
monoubiquitinated histone H2A deubiquitination (GO:0035522)	2	1	0.2622	+	1
monoubiquitinated histone deubiquitination (GO:0035521)	2	1	0.2622	+	1
monoubiquitinated protein deubiquitination (GO:0035520)	2	1	0.2622	+	1
rRNA methylation (GO:0031167)	2	2	0.2622	+	1
GDP-mannose biosynthetic process (GO:0009298)	2	1	0.2622	+	1
meiotic cell cycle checkpoint (GO:0033313)	2	1	0.2622	+	1
rRNA pseudouridine synthesis (GO:0031118)	2	1	0.2622	+	1
mitotic nuclear envelope reassembly (GO:0007084)	2	1	0.2622	+	1
10-formyltetrahydrofolate metabolic process (GO:0009256)	2	1	0.2622	+	1
riboflavin biosynthetic process (GO:0009231)	2	1	0.2622	+	1
protein localization to centrosome (GO:0071539)	2	2	0.2622	+	1
positive regulation of cell cycle G2/M phase transition (GO:1902751)	2	1	0.2622	+	1
regulation of SNARE complex disassembly (GO:0035495)	2	1	0.2622	+	1
aspartate metabolic process (GO:0006531)	2	2	0.2622	+	1
asparagine biosynthetic process (GO:0006529)	2	1	0.2622	+	1
asparagine metabolic process (GO:0006528)	2	1	0.2622	+	1
nuclear pore distribution (GO:0031081)	2	1	0.2622	+	1
carnitine transport (GO:0015879)	2	1	0.2622	+	1
deoxyribonucleoside diphosphate metabolic process (GO:0009186)	2	1	0.2622	+	1
amino-acid betaine transport (GO:0015838)	2	1	0.2622	+	1
pyrimidine deoxyribonucleoside monophosphate biosynthetic process (GO:0009177)	2	2	0.2622	+	1
pyrimidine deoxyribonucleoside monophosphate metabolic process (GO:0009176)	2	2	0.2622	+	1
deoxyribonucleoside monophosphate metabolic process (GO:0009162)	2	2	0.2622	+	1
deoxyribonucleoside monophosphate biosynthetic process (GO:0009157)	2	2	0.2622	+	1
formation of translation initiation ternary complex (GO:0001677)	2	1	0.2622	+	1
mitochondrial protein processing (GO:0034982)	2	1	0.2622	+	1
lipoate biosynthetic process (GO:0009107)	2	1	0.2622	+	1
lipoate metabolic process (GO:0009106)	2	1	0.2622	+	1
regulation of monooxygenase activity (GO:0032768)	2	1	0.2622	+	1
negative regulation of peptidyl-lysine acetylation (GO:2000757)	2	1	0.2622	+	1
positive regulation of G2/M transition of mitotic cell cycle (GO:0010971)	2	1	0.2622	+	1
N-terminal protein lipidation (GO:0006498)	2	1	0.2622	+	1
rRNA-containing ribonucleoprotein complex export from nucleus (GO:0071428)	2	2	0.2622	+	1
ribonucleoprotein complex export from nucleus (GO:0071426)	2	2	0.2622	+	1
dsDNA loop formation (GO:0090579)	2	1	0.2622	+	1
regulation of translational initiation by iron (GO:0006447)	2	1	0.2622	+	1
protein depalmitoylation (GO:0002084)	2	2	0.2622	+	1
queuosine biosynthetic process (GO:0008616)	2	1	0.2622	+	1
tyrosyl-tRNA aminoacylation (GO:0006437)	2	1	0.2622	+	1
threonyl-tRNA aminoacylation (GO:0006435)	2	2	0.2622	+	1
prolyl-tRNA aminoacylation (GO:0006433)	2	2	0.2622	+	1
methionyl-tRNA aminoacylation (GO:0006431)	2	1	0.2622	+	1
glycyl-tRNA aminoacylation (GO:0006426)	2	2	0.2622	+	1
glutamyl-tRNA aminoacylation (GO:0006424)	2	1	0.2622	+	1
cysteinyl-tRNA aminoacylation (GO:0006423)	2	1	0.2622	+	1
asparaginyl-tRNA aminoacylation (GO:0006421)	2	2	0.2622	+	1
positive regulation of defense response to bacterium (GO:1900426)	2	1	0.2622	+	1
UDP-xylose transport (GO:0015790)	2	1	0.2622	+	1
positive regulation of protein import into nucleus, translocation (GO:0033160)	2	1	0.2622	+	1
UDP-N-acetylglucosamine transport (GO:0015788)	2	1	0.2622	+	1
UDP-glucuronic acid transport (GO:0015787)	2	1	0.2622	+	1
UDP-glucose transport (GO:0015786)	2	1	0.2622	+	1
UDP-galactose transport (GO:0015785)	2	1	0.2622	+	1
regulation of protein import into nucleus, translocation (GO:0033158)	2	1	0.2622	+	1
protein K48-linked ubiquitination (GO:0070936)	2	2	0.2622	+	1
regulation of production of small RNA involved in gene silencing by RNA (GO:0070920)	2	1	0.2622	+	1
pentose-phosphate shunt, non-oxidative branch (GO:0009052)	2	2	0.2622	+	1
glycolipid transport (GO:0046836)	2	1	0.2622	+	1
positive regulation of RNA export from nucleus (GO:0046833)	2	2	0.2622	+	1
regulation of RNA export from nucleus (GO:0046831)	2	2	0.2622	+	1
negative regulation of protein export from nucleus (GO:0046826)	2	1	0.2622	+	1
positive regulation of cellular response to X-ray (GO:2000685)	2	1	0.2622	+	1
selenocysteine incorporation (GO:0001514)	2	1	0.2622	+	1
positive regulation of cell division (GO:0051781)	2	1	0.2622	+	1
transcription initiation from RNA polymerase III promoter (GO:0006384)	2	1	0.2622	+	1
7-methylguanosine mRNA capping (GO:0006370)	2	1	0.2622	+	1
actin crosslink formation (GO:0051764)	2	1	0.2622	+	1
DNA-templated transcription, termination (GO:0006353)	2	1	0.2622	+	1
negative regulation of mitochondrion organization (GO:0010823)	2	1	0.2622	+	1
DNA replication-independent nucleosome assembly (GO:0006336)	2	1	0.2622	+	1
quaternary ammonium group transport (GO:0015697)	2	1	0.2622	+	1
histone H4-K20 trimethylation (GO:0034773)	2	1	0.2622	+	1
DNA replication-independent nucleosome organization (GO:0034724)	2	1	0.2622	+	1
protein N-linked glycosylation via asparagine (GO:0018279)	2	1	0.2622	+	1
DNA damage response, signal transduction by p53 class mediator (GO:0030330)	2	1	0.2622	+	1
actin filament capping (GO:0051693)	2	2	0.2622	+	1
nuclear pore localization (GO:0051664)	2	1	0.2622	+	1
DNA replication, synthesis of RNA primer (GO:0006269)	2	1	0.2622	+	1
peptidyl-threonine modification (GO:0018210)	2	2	0.2622	+	1
phagosome-lysosome fusion (GO:0090385)	2	1	0.2622	+	1
preblastoderm mitotic cell cycle (GO:0035185)	2	1	0.2622	+	1
histamine transport (GO:0051608)	2	1	0.2622	+	1
negative regulation of protein acetylation (GO:1901984)	2	1	0.2622	+	1
autophagic vacuole maturation (GO:0097352)	2	2	0.2622	+	1
regulation of cell proliferation involved in compound eye morphogenesis (GO:2000495)	2	1	0.2622	+	1
Rap protein signal transduction (GO:0032486)	2	1	0.2622	+	1
establishment of planar polarity of embryonic epithelium (GO:0042249)	2	1	0.2622	+	1
maintenance of polarity of follicular epithelium (GO:0042248)	2	1	0.2622	+	1
endoplasmic reticulum calcium ion homeostasis (GO:0032469)	2	1	0.2622	+	1
peptidyl-glutamine modification (GO:0018199)	2	1	0.2622	+	1
peptidyl-cysteine modification (GO:0018198)	2	1	0.2622	+	1
peptidyl-asparagine modification (GO:0018196)	2	1	0.2622	+	1
positive regulation of apoptotic cell clearance (GO:2000427)	2	1	0.2622	+	1
regulation of apoptotic cell clearance (GO:2000425)	2	1	0.2622	+	1
histone H4-K12 acetylation (GO:0043983)	2	1	0.2622	+	1
GMP biosynthetic process (GO:0006177)	2	1	0.2622	+	1
histone H2A acetylation (GO:0043968)	2	1	0.2622	+	1
negative regulation of mitochondrial fusion (GO:0010637)	2	1	0.2622	+	1
negative regulation of histone acetylation (GO:0035067)	2	1	0.2622	+	1
gene looping (GO:0090202)	2	1	0.2622	+	1
protein localization to cytoskeleton (GO:0044380)	2	2	0.2622	+	1
lipoprotein catabolic process (GO:0042159)	2	2	0.2622	+	1
mitochondrial respiratory chain complex III assembly (GO:0034551)	2	1	0.2622	+	1
positive regulation of stress fiber assembly (GO:0051496)	2	1	0.2622	+	1
activation of anaphase-promoting complex activity (GO:0051488)	2	1	0.2622	+	1
regulation of double-strand break repair via homologous recombination (GO:0010569)	2	1	0.2622	+	1
peptidyl-lysine dimethylation (GO:0018027)	2	1	0.2622	+	1
ethanol oxidation (GO:0006069)	2	1	0.2622	+	1
ethanol metabolic process (GO:0006067)	2	1	0.2622	+	1
positive regulation of ubiquitin-protein transferase activity (GO:0051443)	2	1	0.2622	+	1
achiasmate meiosis I (GO:0000705)	2	1	0.2622	+	1
neuronal stem cell maintenance (GO:0097150)	2	1	0.2622	+	1
icosanoid biosynthetic process (GO:0046456)	2	1	0.2622	+	1
negative regulation of endoribonuclease activity (GO:0060702)	2	2	0.2622	+	1
negative regulation of ribonuclease activity (GO:0060701)	2	2	0.2622	+	1
regulation of ribonuclease activity (GO:0060700)	2	2	0.2622	+	1
positive regulation of extracellular matrix constituent secretion (GO:0003331)	2	1	0.2622	+	1
regulation of extracellular matrix constituent secretion (GO:0003330)	2	1	0.2622	+	1
oocyte fate commitment (GO:0048600)	2	1	0.2622	+	1
protein repair (GO:0030091)	2	1	0.2622	+	1
positive regulation of nucleobase-containing compound transport (GO:0032241)	2	2	0.2622	+	1
positive regulation of actin filament bundle assembly (GO:0032233)	2	1	0.2622	+	1
negative regulation of translational initiation (GO:0045947)	2	1	0.2622	+	1
positive regulation of decapentaplegic signaling pathway (GO:0090098)	2	1	0.2622	+	1
negative regulation of canonical Wnt signaling pathway (GO:0090090)	2	1	0.2622	+	1
regulation of oxidoreductase activity (GO:0051341)	2	1	0.2622	+	1
chromosome movement towards spindle pole (GO:0051305)	2	1	0.2622	+	1
regulation of endoribonuclease activity (GO:0060699)	2	2	0.2622	+	1
regulation of compound eye retinal cell apoptotic process (GO:1901692)	2	1	0.2622	+	1
protein localization to cell surface (GO:0034394)	2	1	0.2622	+	1
positive regulation of DNA-templated transcription, initiation (GO:2000144)	2	1	0.2622	+	1
retrograde axon cargo transport (GO:0008090)	2	1	0.2622	+	1
macromolecule depalmitoylation (GO:0098734)	2	2	0.2622	+	1
regulation of transcription from RNA polymerase II promoter in response to stress (GO:0043618)	2	1	0.2622	+	1
cell aging (GO:0007569)	2	1	0.2622	+	1
fatty acid derivative biosynthetic process (GO:1901570)	2	1	0.2622	+	1
fatty acid derivative metabolic process (GO:1901568)	2	1	0.2622	+	1
positive regulation of phagocytosis (GO:0050766)	2	1	0.2622	+	1
regulation of anion transport (GO:0044070)	2	1	0.2622	+	1
regulation of endocrine process (GO:0044060)	2	1	0.2622	+	1
negative regulation of nuclease activity (GO:0032074)	2	2	0.2622	+	1
regulation of nuclease activity (GO:0032069)	2	2	0.2622	+	1
cofactor catabolic process (GO:0051187)	2	1	0.2622	+	1
response to UV-B (GO:0010224)	2	1	0.2622	+	1
establishment of ribosome localization (GO:0033753)	2	2	0.2622	+	1
ribosome localization (GO:0033750)	2	2	0.2622	+	1
DNA ligation involved in DNA repair (GO:0051103)	2	1	0.2622	+	1
queuosine metabolic process (GO:0046116)	2	1	0.2622	+	1
substrate-dependent cell migration, cell extension (GO:0006930)	2	1	0.2622	+	1
substrate-dependent cell migration (GO:0006929)	2	1	0.2622	+	1
nuclear envelope disassembly (GO:0051081)	2	1	0.2622	+	1
meiotic nuclear envelope disassembly (GO:0051078)	2	1	0.2622	+	1
barbed-end actin filament capping (GO:0051016)	2	2	0.2622	+	1
negative regulation of mRNA 3'-end processing (GO:0031441)	2	1	0.2622	+	1
peptidyl-pyroglutamic acid biosynthetic process, using glutaminyl-peptide cyclotransferase (GO:0017186)	2	1	0.2622	+	1
modified amino acid transport (GO:0072337)	2	1	0.2622	+	1
positive regulation of Golgi to plasma membrane protein transport (GO:0042998)	2	1	0.2622	+	1
amyloid precursor protein metabolic process (GO:0042982)	2	1	0.2622	+	1
RNA capping (GO:0036260)	3	2	0.3933	+	1
multivesicular body organization (GO:0036257)	3	1	0.3933	+	1
establishment or maintenance of actin cytoskeleton polarity (GO:0030950)	3	1	0.3933	+	1
regulation of vesicle targeting, to, from or within Golgi (GO:0048209)	3	2	0.3933	+	1
hindbrain development (GO:0030902)	3	1	0.3933	+	1
regulation of protein binding (GO:0043393)	3	1	0.3933	+	1
immune response-regulating cell surface receptor signaling pathway involved in phagocytosis (GO:0002433)	3	1	0.3933	+	1
negative regulation of RNA polymerase II transcriptional preinitiation complex assembly (GO:0017055)	3	1	0.3933	+	1
7-methylguanosine RNA capping (GO:0009452)	3	2	0.3933	+	1
gamma-aminobutyric acid metabolic process (GO:0009448)	3	1	0.3933	+	1
integrin-mediated signaling pathway (GO:0007229)	3	1	0.3933	+	1
protein import into peroxisome matrix, docking (GO:0016560)	3	3	0.3933	+	1
peroxisome fission (GO:0016559)	3	1	0.3933	+	1
NADP biosynthetic process (GO:0006741)	3	1	0.3933	+	1
proteasome assembly (GO:0043248)	3	1	0.3933	+	1
adenylate cyclase-activating dopamine receptor signaling pathway (GO:0007191)	3	1	0.3933	+	1
negative regulation of epidermal growth factor-activated receptor activity (GO:0007175)	3	1	0.3933	+	1
positive regulation of cuticle pigmentation (GO:0048081)	3	2	0.3933	+	1
signal transduction in response to DNA damage (GO:0042770)	3	2	0.3933	+	1
phagolysosome assembly (GO:0001845)	3	2	0.3933	+	1
compound eye corneal lens development (GO:0048058)	3	1	0.3933	+	1
insulin-like growth factor receptor signaling pathway (GO:0048009)	3	1	0.3933	+	1
male germline ring canal formation (GO:0030726)	3	1	0.3933	+	1
optomotor response (GO:0071632)	3	1	0.3933	+	1
regulation of chromatin binding (GO:0035561)	3	1	0.3933	+	1
negative regulation of cysteine-type endopeptidase activity involved in apoptotic process (GO:0043154)	3	2	0.3933	+	1
viral life cycle (GO:0019058)	3	2	0.3933	+	1
response to desiccation (GO:0009269)	3	1	0.3933	+	1
2'-deoxyribonucleotide biosynthetic process (GO:0009265)	3	3	0.3933	+	1
deoxyribonucleotide biosynthetic process (GO:0009263)	3	3	0.3933	+	1
pyrimidine deoxyribonucleotide biosynthetic process (GO:0009221)	3	3	0.3933	+	1
positive regulation of DNA endoreduplication (GO:0032877)	3	1	0.3933	+	1
mitotic G1/S transition checkpoint (GO:0044819)	3	1	0.3933	+	1
valine metabolic process (GO:0006573)	3	1	0.3933	+	1
positive regulation of synaptic transmission, glutamatergic (GO:0051968)	3	1	0.3933	+	1
endoplasmic reticulum membrane fusion (GO:0016320)	3	1	0.3933	+	1
misfolded or incompletely synthesized protein catabolic process (GO:0006515)	3	1	0.3933	+	1
neurotransmitter receptor metabolic process (GO:0045213)	3	1	0.3933	+	1
negative regulation of histone methylation (GO:0031061)	3	1	0.3933	+	1
leucine transport (GO:0015820)	3	1	0.3933	+	1
G1 DNA damage checkpoint (GO:0044783)	3	1	0.3933	+	1
fatty-acyl-CoA biosynthetic process (GO:0046949)	3	1	0.3933	+	1
branched-chain amino acid transport (GO:0015803)	3	1	0.3933	+	1
nucleoside diphosphate biosynthetic process (GO:0009133)	3	1	0.3933	+	1
DNA methylation or demethylation (GO:0044728)	3	1	0.3933	+	1
regulation of double-strand break repair (GO:2000779)	3	1	0.3933	+	1
positive regulation of peptidyl-lysine acetylation (GO:2000758)	3	1	0.3933	+	1
attachment of GPI anchor to protein (GO:0016255)	3	1	0.3933	+	1
C-terminal protein amino acid modification (GO:0018410)	3	1	0.3933	+	1
translational readthrough (GO:0006451)	3	2	0.3933	+	1
peptidyl-lysine modification to peptidyl-hypusine (GO:0008612)	3	1	0.3933	+	1
seryl-tRNA aminoacylation (GO:0006434)	3	1	0.3933	+	1
phenylalanyl-tRNA aminoacylation (GO:0006432)	3	3	0.3933	+	1
arginyl-tRNA aminoacylation (GO:0006420)	3	1	0.3933	+	1
alanyl-tRNA aminoacylation (GO:0006419)	3	2	0.3933	+	1
regulation of cellular response to oxidative stress (GO:1900407)	3	2	0.3933	+	1
pyrimidine nucleotide-sugar transport (GO:0015781)	3	1	0.3933	+	1
nucleotide-sugar transport (GO:0015780)	3	1	0.3933	+	1
fatty-acyl-CoA metabolic process (GO:0035337)	3	1	0.3933	+	1
oocyte growth (GO:0001555)	3	1	0.3933	+	1
regulation of protein export from nucleus (GO:0046825)	3	1	0.3933	+	1
tRNA methylation (GO:0030488)	3	3	0.3933	+	1
regulation of sequestering of triglyceride (GO:0010889)	3	1	0.3933	+	1
negative regulation of lipid storage (GO:0010888)	3	1	0.3933	+	1
visual learning (GO:0008542)	3	1	0.3933	+	1
DNA methylation (GO:0006306)	3	1	0.3933	+	1
DNA alkylation (GO:0006305)	3	1	0.3933	+	1
peptidyl-arginine omega-N-methylation (GO:0035247)	3	1	0.3933	+	1
peptidyl-arginine N-methylation (GO:0035246)	3	1	0.3933	+	1
copper ion import (GO:0015677)	3	1	0.3933	+	1
regulation of sister chromatid segregation (GO:0033045)	3	1	0.3933	+	1
histone H4-K20 methylation (GO:0034770)	3	2	0.3933	+	1
membrane disassembly (GO:0030397)	3	1	0.3933	+	1
endosome to lysosome transport via multivesicular body sorting pathway (GO:0032510)	3	2	0.3933	+	1
localization within membrane (GO:0051668)	3	1	0.3933	+	1
DNA ligation (GO:0006266)	3	1	0.3933	+	1
peptidyl-arginine methylation (GO:0018216)	3	1	0.3933	+	1
viral process (GO:0016032)	3	2	0.3933	+	1
phagosome maturation (GO:0090382)	3	2	0.3933	+	1
regulation of heart induction (GO:0090381)	3	1	0.3933	+	1
endoplasmic reticulum localization (GO:0051643)	3	1	0.3933	+	1
peptidyl-histidine modification (GO:0018202)	3	2	0.3933	+	1
nuclear axial expansion (GO:0035191)	3	1	0.3933	+	1
protein localization to cell junction (GO:1902414)	3	1	0.3933	+	1
cytidine catabolic process (GO:0006216)	3	1	0.3933	+	1
positive regulation of protein acetylation (GO:1901985)	3	1	0.3933	+	1
histone H3-K27 methylation (GO:0070734)	3	2	0.3933	+	1
peptidyl-arginine methylation, to asymmetrical-dimethyl arginine (GO:0019919)	3	1	0.3933	+	1
regulation of shoot system development (GO:0048831)	3	1	0.3933	+	1
tetrahydrofolate metabolic process (GO:0046653)	3	1	0.3933	+	1
interspecies interaction between organisms (GO:0044419)	3	2	0.3933	+	1
symbiosis, encompassing mutualism through parasitism (GO:0044403)	3	2	0.3933	+	1
cellular protein complex localization (GO:0034629)	3	1	0.3933	+	1
peptidyl-arginine modification (GO:0018195)	3	1	0.3933	+	1
age-dependent response to oxidative stress (GO:0001306)	3	2	0.3933	+	1
ribonucleoprotein complex localization (GO:0071166)	3	2	0.3933	+	1
male sex determination (GO:0030238)	3	1	0.3933	+	1
protein to membrane docking (GO:0022615)	3	3	0.3933	+	1
histone H3-K9 acetylation (GO:0043970)	3	1	0.3933	+	1
canonical Wnt signaling pathway involved in heart development (GO:0061316)	3	1	0.3933	+	1
cell surface receptor signaling pathway involved in heart development (GO:0061311)	3	1	0.3933	+	1
gurken signaling pathway (GO:0008314)	3	1	0.3933	+	1
protein localization involved in establishment of planar polarity (GO:0090251)	3	2	0.3933	+	1
mitochondrial electron transport, succinate to ubiquinone (GO:0006121)	3	1	0.3933	+	1
positive regulation of histone acetylation (GO:0035066)	3	1	0.3933	+	1
regulation of lipid transport (GO:0032368)	3	1	0.3933	+	1
regulation of COPII vesicle coating (GO:0003400)	3	2	0.3933	+	1
meiotic DNA double-strand break formation (GO:0042138)	3	3	0.3933	+	1
spermidine biosynthetic process (GO:0008295)	3	1	0.3933	+	1
protein-cofactor linkage (GO:0018065)	3	1	0.3933	+	1
negative regulation of filopodium assembly (GO:0051490)	3	2	0.3933	+	1
myoblast proliferation (GO:0051450)	3	1	0.3933	+	1
regulation of cellular response to hypoxia (GO:1900037)	3	2	0.3933	+	1
DNA double-strand break processing (GO:0000729)	3	1	0.3933	+	1
meiotic DNA double-strand break processing (GO:0000706)	3	1	0.3933	+	1
cytidine deamination (GO:0009972)	3	1	0.3933	+	1
regulation of ER to Golgi vesicle-mediated transport by GTP hydrolysis (GO:0090113)	3	2	0.3933	+	1
sprouting of injured axon (GO:0048682)	3	1	0.3933	+	1
collateral sprouting of injured axon (GO:0048674)	3	1	0.3933	+	1
collateral sprouting (GO:0048668)	3	1	0.3933	+	1
embryonic foregut morphogenesis (GO:0048617)	3	1	0.3933	+	1
regulation of dopamine metabolic process (GO:0042053)	3	1	0.3933	+	1
negative regulation of receptor activity (GO:2000272)	3	1	0.3933	+	1
Wnt signaling pathway involved in heart development (GO:0003306)	3	1	0.3933	+	1
regulation of nucleobase-containing compound transport (GO:0032239)	3	2	0.3933	+	1
positive regulation of mitotic cell cycle, embryonic (GO:0045977)	3	1	0.3933	+	1
centriole-centriole cohesion (GO:0010457)	3	1	0.3933	+	1
positive regulation of ligase activity (GO:0051351)	3	1	0.3933	+	1
positive regulation of response to biotic stimulus (GO:0002833)	3	1	0.3933	+	1
metaphase (GO:0051323)	3	1	0.3933	+	1
attachment of spindle microtubules to kinetochore involved in mitotic sister chromatid segregation (GO:0051315)	3	1	0.3933	+	1
GDP-mannose metabolic process (GO:0019673)	3	1	0.3933	+	1
protein localization to plasma membrane (GO:0072659)	3	1	0.3933	+	1
positive regulation of establishment of protein localization to plasma membrane (GO:0090004)	3	1	0.3933	+	1
deoxyribose phosphate biosynthetic process (GO:0046385)	3	3	0.3933	+	1
optokinetic behavior (GO:0007634)	3	1	0.3933	+	1
mitochondrial respiratory chain complex III biogenesis (GO:0097033)	3	2	0.3933	+	1
regulation of RNA polymerase II transcriptional preinitiation complex assembly (GO:0045898)	3	1	0.3933	+	1
primary alcohol metabolic process (GO:0034308)	3	1	0.3933	+	1
positive regulation of DNA-dependent DNA replication (GO:2000105)	3	1	0.3933	+	1
response to trehalose (GO:0010353)	3	1	0.3933	+	1
spindle midzone assembly involved in meiosis (GO:0051257)	3	3	0.3933	+	1
protein insertion into membrane (GO:0051205)	3	1	0.3933	+	1
terminal button organization (GO:0072553)	3	2	0.3933	+	1
negative regulation of ERK1 and ERK2 cascade (GO:0070373)	3	2	0.3933	+	1
age-dependent general metabolic decline (GO:0007571)	3	2	0.3933	+	1
regulation of phagocytosis (GO:0050764)	3	1	0.3933	+	1
negative regulation of heart induction by canonical Wnt signaling pathway (GO:0003136)	3	1	0.3933	+	1
regulation of DNA methylation (GO:0044030)	3	1	0.3933	+	1
DNA hypermethylation (GO:0044026)	3	1	0.3933	+	1
regulation of trichome morphogenesis (GO:2000039)	3	1	0.3933	+	1
regulation of stem cell division (GO:2000035)	3	1	0.3933	+	1
regulation of leaf development (GO:2000024)	3	1	0.3933	+	1
mitotic G1 DNA damage checkpoint (GO:0031571)	3	1	0.3933	+	1
protein complex localization (GO:0031503)	3	1	0.3933	+	1
regulation of rhodopsin gene expression (GO:0007468)	3	1	0.3933	+	1
stomatogastric nervous system development (GO:0007421)	3	1	0.3933	+	1
regulation of epidermis development (GO:0045682)	3	1	0.3933	+	1
protein deneddylation (GO:0000338)	3	1	0.3933	+	1
regulation of epidermal cell differentiation (GO:0045604)	3	1	0.3933	+	1
nuclear envelope reassembly (GO:0031468)	3	2	0.3933	+	1
peptidyl-diphthamide biosynthetic process from peptidyl-histidine (GO:0017183)	3	2	0.3933	+	1
peptidyl-diphthamide metabolic process (GO:0017182)	3	2	0.3933	+	1
suture of dorsal opening (GO:0007396)	3	1	0.3933	+	1
leucine import (GO:0060356)	3	1	0.3933	+	1
determination of dorsal/ventral asymmetry (GO:0048262)	3	2	0.3933	+	1
cytidine metabolic process (GO:0046087)	3	1	0.3933	+	1
protein localization to adherens junction (GO:0071896)	3	1	0.3933	+	1
negative regulation of heart induction (GO:1901320)	3	1	0.3933	+	1
plasma membrane to endosome transport (GO:0048227)	4	2	0.5244	+	1
astral microtubule organization (GO:0030953)	4	1	0.5244	+	1
regulation of transcription from RNA polymerase II promoter, mitotic (GO:0046021)	4	1	0.5244	+	1
endosomal vesicle fusion (GO:0034058)	4	2	0.5244	+	1
mitochondrial pyruvate transport (GO:0006850)	4	1	0.5244	+	1
intraciliary retrograde transport (GO:0035721)	4	1	0.5244	+	1
N-terminal protein amino acid modification (GO:0031365)	4	3	0.5244	+	1
ovarian follicle cell-cell adhesion (GO:0007299)	4	1	0.5244	+	1
spermatid nucleus elongation (GO:0007290)	4	1	0.5244	+	1
intrinsic apoptotic signaling pathway in response to endoplasmic reticulum stress (GO:0070059)	4	1	0.5244	+	1
pole cell fate determination (GO:0007278)	4	1	0.5244	+	1
response to water deprivation (GO:0009414)	4	1	0.5244	+	1
male germ-line stem cell asymmetric division (GO:0048133)	4	2	0.5244	+	1
vitamin B6 biosynthetic process (GO:0042819)	4	1	0.5244	+	1
vitamin B6 metabolic process (GO:0042816)	4	1	0.5244	+	1
nucleosome positioning (GO:0016584)	4	1	0.5244	+	1
histone ubiquitination (GO:0016574)	4	2	0.5244	+	1
protein autoprocessing (GO:0016540)	4	1	0.5244	+	1
tetrahydrobiopterin biosynthetic process (GO:0006729)	4	1	0.5244	+	1
positive regulation of protein complex disassembly (GO:0043243)	4	1	0.5244	+	1
snRNA transcription from RNA polymerase III promoter (GO:0042796)	4	2	0.5244	+	1
regulation of epidermal growth factor-activated receptor activity (GO:0007176)	4	1	0.5244	+	1
positive regulation of developmental pigmentation (GO:0048087)	4	2	0.5244	+	1
intrinsic apoptotic signaling pathway in response to DNA damage by p53 class mediator (GO:0042771)	4	2	0.5244	+	1
cleavage furrow ingression (GO:0036090)	4	2	0.5244	+	1
ectodermal placode morphogenesis (GO:0071697)	4	1	0.5244	+	1
ectodermal placode development (GO:0071696)	4	1	0.5244	+	1
negative regulation of mRNA splicing, via spliceosome (GO:0048025)	4	1	0.5244	+	1
circadian regulation of gene expression (GO:0032922)	4	1	0.5244	+	1
regulation of response to oxidative stress (GO:1902882)	4	2	0.5244	+	1
P granule organization (GO:0030719)	4	2	0.5244	+	1
glycosphingolipid biosynthetic process (GO:0006688)	4	2	0.5244	+	1
nucleoside salvage (GO:0043174)	4	1	0.5244	+	1
rhabdomere membrane biogenesis (GO:0045313)	4	1	0.5244	+	1
regulation of postsynaptic membrane potential (GO:0060078)	4	1	0.5244	+	1
axon regeneration (GO:0031103)	4	1	0.5244	+	1
negative regulation of transcription from RNA polymerase II promoter during mitosis (GO:0007070)	4	1	0.5244	+	1
negative regulation of transcription during mitosis (GO:0007068)	4	1	0.5244	+	1
spindle assembly involved in female meiosis II (GO:0007058)	4	1	0.5244	+	1
spindle assembly involved in female meiosis I (GO:0007057)	4	1	0.5244	+	1
optic lobe placode formation (GO:0001744)	4	1	0.5244	+	1
optic placode formation (GO:0001743)	4	1	0.5244	+	1
vacuolar acidification (GO:0007035)	4	1	0.5244	+	1
pyrimidine ribonucleoside triphosphate biosynthetic process (GO:0009209)	4	2	0.5244	+	1
tubulin complex assembly (GO:0007021)	4	1	0.5244	+	1
CAAX-box protein processing (GO:0071586)	4	1	0.5244	+	1
inositol phosphate catabolic process (GO:0071545)	4	1	0.5244	+	1
regulation of synaptic transmission, glutamatergic (GO:0051966)	4	1	0.5244	+	1
proline biosynthetic process (GO:0006561)	4	1	0.5244	+	1
mRNA cis splicing, via spliceosome (GO:0045292)	4	1	0.5244	+	1
leucine metabolic process (GO:0006551)	4	1	0.5244	+	1
protein monoubiquitination (GO:0006513)	4	2	0.5244	+	1
establishment of neuroblast polarity (GO:0045200)	4	2	0.5244	+	1
regulation of cellular amine metabolic process (GO:0033238)	4	2	0.5244	+	1
negative regulation of apoptotic signaling pathway (GO:2001234)	4	2	0.5244	+	1
negative regulation of response to gamma radiation (GO:2001229)	4	1	0.5244	+	1
regulation of response to gamma radiation (GO:2001228)	4	1	0.5244	+	1
pyrimidine ribonucleoside monophosphate biosynthetic process (GO:0009174)	4	1	0.5244	+	1
pyrimidine ribonucleoside monophosphate metabolic process (GO:0009173)	4	1	0.5244	+	1
ribonucleoside monophosphate catabolic process (GO:0009158)	4	1	0.5244	+	1
multi-organism cellular process (GO:0044764)	4	2	0.5244	+	1
pyrimidine nucleoside triphosphate biosynthetic process (GO:0009148)	4	2	0.5244	+	1
nucleoside monophosphate catabolic process (GO:0009125)	4	1	0.5244	+	1
negative regulation of DNA-templated transcription, elongation (GO:0032785)	4	1	0.5244	+	1
N-glycan processing (GO:0006491)	4	2	0.5244	+	1
maintenance of epithelial cell apical/basal polarity (GO:0045199)	4	1	0.5244	+	1
tRNA wobble uridine modification (GO:0002098)	4	3	0.5244	+	1
tRNA wobble base modification (GO:0002097)	4	3	0.5244	+	1
pyridoxine biosynthetic process (GO:0008615)	4	1	0.5244	+	1
pyridoxine metabolic process (GO:0008614)	4	1	0.5244	+	1
homologous chromosome segregation (GO:0045143)	4	3	0.5244	+	1
azole transport (GO:0045117)	4	1	0.5244	+	1
protein neddylation (GO:0045116)	4	1	0.5244	+	1
imaginal disc-derived wing hair site selection (GO:0035320)	4	1	0.5244	+	1
regulation of hormone secretion (GO:0046883)	4	1	0.5244	+	1
mitochondrial respiratory chain complex assembly (GO:0033108)	4	1	0.5244	+	1
inositol phosphate dephosphorylation (GO:0046855)	4	1	0.5244	+	1
micropyle formation (GO:0046844)	4	1	0.5244	+	1
regulation of extracellular matrix organization (GO:1903053)	4	1	0.5244	+	1
phosphorylated carbohydrate dephosphorylation (GO:0046838)	4	1	0.5244	+	1
regulation of cellular response to X-ray (GO:2000683)	4	1	0.5244	+	1
maturation of SSU-rRNA (GO:0030490)	4	1	0.5244	+	1
protein geranylgeranylation (GO:0018344)	4	2	0.5244	+	1
chromatin silencing at telomere (GO:0006348)	4	1	0.5244	+	1
terpenoid biosynthetic process (GO:0016114)	4	1	0.5244	+	1
regulation of Malpighian tubule size (GO:0035298)	4	1	0.5244	+	1
DNA modification (GO:0006304)	4	1	0.5244	+	1
positive regulation of protein exit from endoplasmic reticulum (GO:0070863)	4	2	0.5244	+	1
early endosome to late endosome transport (GO:0045022)	4	2	0.5244	+	1
negative regulation of lamellocyte differentiation (GO:0035204)	4	1	0.5244	+	1
negative regulation of cell migration (GO:0030336)	4	1	0.5244	+	1
cellular response to amino acid stimulus (GO:0071230)	4	1	0.5244	+	1
CTP biosynthetic process (GO:0006241)	4	2	0.5244	+	1
UTP biosynthetic process (GO:0006228)	4	2	0.5244	+	1
dendritic spine morphogenesis (GO:0060997)	4	1	0.5244	+	1
dendritic spine development (GO:0060996)	4	1	0.5244	+	1
sterol regulatory element binding protein cleavage (GO:0035103)	4	2	0.5244	+	1
ribosomal large subunit biogenesis (GO:0042273)	4	1	0.5244	+	1
embryonic cleavage (GO:0040016)	4	2	0.5244	+	1
negative regulation of locomotion (GO:0040013)	4	1	0.5244	+	1
histone H4-K16 acetylation (GO:0043984)	4	1	0.5244	+	1
GTP biosynthetic process (GO:0006183)	4	2	0.5244	+	1
establishment of proximal/distal cell polarity (GO:0022606)	4	1	0.5244	+	1
negative regulation of antimicrobial humoral response (GO:0008348)	4	1	0.5244	+	1
purine ribonucleoside salvage (GO:0006166)	4	1	0.5244	+	1
axon transport of mitochondrion (GO:0019896)	4	1	0.5244	+	1
regulation of cytoplasmic mRNA processing body assembly (GO:0010603)	4	1	0.5244	+	1
siRNA loading onto RISC involved in RNA interference (GO:0035087)	4	1	0.5244	+	1
pronuclear migration (GO:0035046)	4	1	0.5244	+	1
sperm aster formation (GO:0035044)	4	1	0.5244	+	1
positive regulation of transcription of nuclear large rRNA transcript from RNA polymerase I promoter (GO:1901838)	4	3	0.5244	+	1
S-adenosylmethionine metabolic process (GO:0046500)	4	1	0.5244	+	1
protein import into mitochondrial matrix (GO:0030150)	4	1	0.5244	+	1
gluconeogenesis (GO:0006094)	4	1	0.5244	+	1
peptidyl-lysine trimethylation (GO:0018023)	4	1	0.5244	+	1
spermidine metabolic process (GO:0008216)	4	2	0.5244	+	1
establishment of epithelial cell planar polarity (GO:0090163)	4	1	0.5244	+	1
cholesterol metabolic process (GO:0008203)	4	2	0.5244	+	1
COPII-coated vesicle budding (GO:0090114)	4	2	0.5244	+	1
ectodermal placode formation (GO:0060788)	4	1	0.5244	+	1
embryonic anterior midgut (ectodermal) morphogenesis (GO:0048615)	4	2	0.5244	+	1
embryonic ectodermal digestive tract morphogenesis (GO:0048613)	4	2	0.5244	+	1
embryonic ectodermal digestive tract development (GO:0048611)	4	2	0.5244	+	1
regulation of catecholamine metabolic process (GO:0042069)	4	2	0.5244	+	1
regulation of receptor activity (GO:0010469)	4	1	0.5244	+	1
tubulin complex biogenesis (GO:0072668)	4	1	0.5244	+	1
embryonic organ morphogenesis (GO:0048562)	4	2	0.5244	+	1
embryonic digestive tract morphogenesis (GO:0048557)	4	2	0.5244	+	1
regulation of ER to Golgi vesicle-mediated transport (GO:0060628)	4	2	0.5244	+	1
negative regulation of cell motility (GO:2000146)	4	1	0.5244	+	1
negative regulation of protein tyrosine kinase activity (GO:0061099)	4	1	0.5244	+	1
regulation of transcription during mitosis (GO:0045896)	4	1	0.5244	+	1
regulation of histone H3-K27 methylation (GO:0061085)	4	1	0.5244	+	1
anterograde axon cargo transport (GO:0008089)	4	2	0.5244	+	1
negative regulation of cysteine-type endopeptidase activity (GO:2000117)	4	2	0.5244	+	1
post-translational protein modification (GO:0043687)	4	1	0.5244	+	1
immune response-regulating signaling pathway (GO:0002764)	4	1	0.5244	+	1
negative regulation of cellular component movement (GO:0051271)	4	1	0.5244	+	1
innate immune response-activating signal transduction (GO:0002758)	4	1	0.5244	+	1
immune response-activating signal transduction (GO:0002757)	4	1	0.5244	+	1
ocellus development (GO:0008056)	4	1	0.5244	+	1
mitochondrial fusion (GO:0008053)	4	1	0.5244	+	1
spindle midzone assembly (GO:0051255)	4	3	0.5244	+	1
regulation of DNA-templated transcription in response to stress (GO:0043620)	4	1	0.5244	+	1
CAAX-box protein maturation (GO:0080120)	4	1	0.5244	+	1
membrane biogenesis (GO:0044091)	4	1	0.5244	+	1
negative regulation of transcription elongation from RNA polymerase II promoter (GO:0034244)	4	1	0.5244	+	1
tRNA thio-modification (GO:0034227)	4	2	0.5244	+	1
positive regulation of chromatin assembly or disassembly (GO:0045799)	4	1	0.5244	+	1
positive regulation of DNA replication (GO:0045740)	4	1	0.5244	+	1
maturation of SSU-rRNA from tricistronic rRNA transcript (SSU-rRNA, 5.8S rRNA, LSU-rRNA) (GO:0000462)	4	1	0.5244	+	1
negative regulation of JUN kinase activity (GO:0043508)	4	1	0.5244	+	1
anterior midgut development (GO:0007496)	4	1	0.5244	+	1
anterior midgut (ectodermal) morphogenesis (GO:0007441)	4	2	0.5244	+	1
heparan sulfate proteoglycan biosynthetic process, polysaccharide chain biosynthetic process (GO:0015014)	4	1	0.5244	+	1
tetrahydrobiopterin metabolic process (GO:0046146)	4	1	0.5244	+	1
pyrimidine nucleoside catabolic process (GO:0046135)	4	1	0.5244	+	1
pyrimidine ribonucleoside catabolic process (GO:0046133)	4	1	0.5244	+	1
nucleobase catabolic process (GO:0046113)	4	1	0.5244	+	1
negative regulation of plasmatocyte differentiation (GO:0045614)	4	1	0.5244	+	1
positive regulation of heterochromatin assembly (GO:0031453)	4	1	0.5244	+	1
dorsal closure, spreading of leading edge cells (GO:0007395)	4	2	0.5244	+	1
intrinsic apoptotic signaling pathway by p53 class mediator (GO:0072332)	4	2	0.5244	+	1
regulation of cell diameter (GO:0060305)	4	1	0.5244	+	1
CTP metabolic process (GO:0046036)	5	2	0.6555	+	1
response to anoxia (GO:0034059)	5	1	0.6555	+	1
purine nucleoside bisphosphate biosynthetic process (GO:0034033)	5	1	0.6555	+	1
ribonucleoside bisphosphate biosynthetic process (GO:0034030)	5	1	0.6555	+	1
cellular copper ion homeostasis (GO:0006878)	5	1	0.6555	+	1
pyruvate transport (GO:0006848)	5	1	0.6555	+	1
primary spermatocyte growth (GO:0007285)	5	1	0.6555	+	1
spermatogonial cell division (GO:0007284)	5	1	0.6555	+	1
regulation of transcription initiation from RNA polymerase II promoter (GO:0060260)	5	2	0.6555	+	1
positive regulation of glial cell proliferation (GO:0060252)	5	3	0.6555	+	1
germ-line stem-cell niche homeostasis (GO:0060250)	5	1	0.6555	+	1
vasculature development (GO:0001944)	5	1	0.6555	+	1
regulation of epithelial cell differentiation (GO:0030856)	5	1	0.6555	+	1
histone deacetylation (GO:0016575)	5	3	0.6555	+	1
protein import into peroxisome matrix (GO:0016558)	5	3	0.6555	+	1
pteridine biosynthetic process (GO:0006728)	5	1	0.6555	+	1
inactivation of MAPK activity (GO:0000188)	5	2	0.6555	+	1
response to amino acid (GO:0043200)	5	1	0.6555	+	1
folic acid-containing compound biosynthetic process (GO:0009396)	5	1	0.6555	+	1
2'-deoxyribonucleotide metabolic process (GO:0009394)	5	3	0.6555	+	1
snRNA transcription from RNA polymerase II promoter (GO:0042795)	5	1	0.6555	+	1
regulation of compound eye pigmentation (GO:0048076)	5	1	0.6555	+	1
regulation of eye pigmentation (GO:0048073)	5	1	0.6555	+	1
positive regulation of posttranscriptional gene silencing (GO:0060148)	5	1	0.6555	+	1
regulation of posttranscriptional gene silencing (GO:0060147)	5	1	0.6555	+	1
mitotic centrosome separation (GO:0007100)	5	2	0.6555	+	1
protein targeting to lysosome (GO:0006622)	5	1	0.6555	+	1
mitotic M phase (GO:0000087)	5	1	0.6555	+	1
meiotic spindle stabilization (GO:0043147)	5	1	0.6555	+	1
very long-chain fatty acid metabolic process (GO:0000038)	5	1	0.6555	+	1
female germ-line sex determination (GO:0019099)	5	1	0.6555	+	1
coenzyme A biosynthetic process (GO:0015937)	5	1	0.6555	+	1
synapse maturation (GO:0060074)	5	1	0.6555	+	1
Wnt signaling pathway, planar cell polarity pathway (GO:0060071)	5	2	0.6555	+	1
glucosamine-containing compound biosynthetic process (GO:1901073)	5	1	0.6555	+	1
male meiosis sister chromatid cohesion (GO:0007065)	5	1	0.6555	+	1
pyrimidine deoxyribonucleotide metabolic process (GO:0009219)	5	3	0.6555	+	1
regulation of DNA endoreduplication (GO:0032875)	5	1	0.6555	+	1
pyrimidine ribonucleoside triphosphate metabolic process (GO:0009208)	5	2	0.6555	+	1
polyamine biosynthetic process (GO:0006596)	5	1	0.6555	+	1
regulation of chromosome segregation (GO:0051983)	5	1	0.6555	+	1
positive regulation of histone methylation (GO:0031062)	5	1	0.6555	+	1
negative regulation of histone modification (GO:0031057)	5	2	0.6555	+	1
pyrimidine nucleoside monophosphate biosynthetic process (GO:0009130)	5	2	0.6555	+	1
pyrimidine nucleoside monophosphate metabolic process (GO:0009129)	5	2	0.6555	+	1
Cajal body organization (GO:0030576)	5	1	0.6555	+	1
cellular response to superoxide (GO:0071451)	5	2	0.6555	+	1
cellular response to oxygen radical (GO:0071450)	5	2	0.6555	+	1
negative regulation of macroautophagy (GO:0016242)	5	2	0.6555	+	1
synaptic target attraction (GO:0016200)	5	1	0.6555	+	1
positive regulation of gliogenesis (GO:0014015)	5	3	0.6555	+	1
actin filament reorganization (GO:0090527)	5	3	0.6555	+	1
morphogenesis of an epithelial sheet (GO:0002011)	5	3	0.6555	+	1
negative regulation of protein dephosphorylation (GO:0035308)	5	2	0.6555	+	1
negative regulation of dephosphorylation (GO:0035305)	5	2	0.6555	+	1
negative regulation of proteolysis involved in cellular protein catabolic process (GO:1903051)	5	1	0.6555	+	1
positive regulation of gene silencing by miRNA (GO:2000637)	5	1	0.6555	+	1
regulation of transcription from RNA polymerase III promoter (GO:0006359)	5	3	0.6555	+	1
regulation of protein exit from endoplasmic reticulum (GO:0070861)	5	2	0.6555	+	1
regulation of lamellocyte differentiation (GO:0035203)	5	1	0.6555	+	1
regulation of DNA repair (GO:0006282)	5	3	0.6555	+	1
mitochondrial DNA replication (GO:0006264)	5	2	0.6555	+	1
lamellocyte differentiation (GO:0035171)	5	1	0.6555	+	1
regulation of gene silencing by miRNA (GO:0060964)	5	1	0.6555	+	1
dorsal closure, leading edge cell differentiation (GO:0046663)	5	2	0.6555	+	1
membrane tubulation (GO:0097320)	5	1	0.6555	+	1
ribosome assembly (GO:0042255)	5	1	0.6555	+	1
negative regulation of proteasomal ubiquitin-dependent protein catabolic process (GO:0032435)	5	1	0.6555	+	1
nucleoside diphosphate phosphorylation (GO:0006165)	5	3	0.6555	+	1
regulation of mitochondrial fusion (GO:0010635)	5	1	0.6555	+	1
cell elongation involved in imaginal disc-derived wing morphogenesis (GO:0090254)	5	1	0.6555	+	1
positive regulation of multi-organism process (GO:0043902)	5	1	0.6555	+	1
leading edge cell differentiation (GO:0035026)	5	2	0.6555	+	1
cytoskeletal matrix organization at active zone (GO:0048789)	5	1	0.6555	+	1
regulation of transcription of nuclear large rRNA transcript from RNA polymerase I promoter (GO:1901836)	5	3	0.6555	+	1
epidermis morphogenesis (GO:0048730)	5	1	0.6555	+	1
negative regulation of protein catabolic process (GO:0042177)	5	1	0.6555	+	1
regulation of stress fiber assembly (GO:0051492)	5	2	0.6555	+	1
peptidyl-lysine methylation (GO:0018022)	5	2	0.6555	+	1
negative regulation of humoral immune response (GO:0002921)	5	1	0.6555	+	1
karyogamy (GO:0000741)	5	1	0.6555	+	1
chitin biosynthetic process (GO:0006031)	5	1	0.6555	+	1
negative regulation of proteasomal protein catabolic process (GO:1901799)	5	1	0.6555	+	1
polarity specification of anterior/posterior axis (GO:0009949)	5	3	0.6555	+	1
response to axon injury (GO:0048678)	5	1	0.6555	+	1
regulation of photoreceptor cell axon guidance (GO:2000289)	5	1	0.6555	+	1
actin filament depolymerization (GO:0030042)	5	1	0.6555	+	1
actin filament polymerization (GO:0030041)	5	3	0.6555	+	1
actin filament reorganization involved in cell cycle (GO:0030037)	5	3	0.6555	+	1
positive regulation of transcription from RNA polymerase I promoter (GO:0045943)	5	4	0.6555	+	1
deoxyribose phosphate metabolic process (GO:0019692)	5	3	0.6555	+	1
mitotic sister chromatid separation (GO:0051306)	5	2	0.6555	+	1
embryonic digestive tract development (GO:0048566)	5	2	0.6555	+	1
dendritic spine organization (GO:0097061)	5	1	0.6555	+	1
monosaccharide biosynthetic process (GO:0046364)	5	1	0.6555	+	1
regulation of DNA-templated transcription, initiation (GO:2000142)	5	2	0.6555	+	1
negative regulation of response to nutrient levels (GO:0032108)	5	2	0.6555	+	1
negative regulation of response to extracellular stimulus (GO:0032105)	5	2	0.6555	+	1
positive regulation of nurse cell apoptotic process (GO:0045850)	5	2	0.6555	+	1
nucleoside bisphosphate biosynthetic process (GO:0033866)	5	1	0.6555	+	1
regulation of eclosion (GO:0007563)	5	1	0.6555	+	1
negative regulation of axonogenesis (GO:0050771)	5	1	0.6555	+	1
mitochondrial DNA metabolic process (GO:0032042)	5	2	0.6555	+	1
negative regulation of TOR signaling (GO:0032007)	5	1	0.6555	+	1
skin morphogenesis (GO:0043589)	5	1	0.6555	+	1
vitamin transport (GO:0051180)	5	1	0.6555	+	1
positive regulation of fibroblast growth factor receptor signaling pathway (GO:0045743)	5	1	0.6555	+	1
mitochondrion degradation (GO:0000422)	5	2	0.6555	+	1
removal of superoxide radicals (GO:0019430)	5	2	0.6555	+	1
polyol catabolic process (GO:0046174)	5	1	0.6555	+	1
cellular response to amino acid starvation (GO:0034198)	5	1	0.6555	+	1
nuclear envelope organization (GO:0006998)	5	3	0.6555	+	1
spliceosomal snRNP assembly (GO:0000387)	5	2	0.6555	+	1
positive regulation of DNA metabolic process (GO:0051054)	5	1	0.6555	+	1
regulation of plasmatocyte differentiation (GO:0045613)	5	1	0.6555	+	1
response to oxygen radical (GO:0000305)	5	2	0.6555	+	1
response to superoxide (GO:0000303)	5	2	0.6555	+	1
signal transduction by p53 class mediator (GO:0072331)	5	2	0.6555	+	1
regulation of Golgi to plasma membrane protein transport (GO:0042996)	5	2	0.6555	+	1
posterior midgut invagination (GO:0007374)	5	1	0.6555	+	1
pentose metabolic process (GO:0019321)	5	2	0.6555	+	1
hexose biosynthetic process (GO:0019319)	5	1	0.6555	+	1
regulation of syncytial blastoderm mitotic cell cycle (GO:0007348)	5	1	0.6555	+	1
pronuclear fusion (GO:0007344)	5	1	0.6555	+	1
UTP metabolic process (GO:0046051)	5	2	0.6555	+	1
superoxide metabolic process (GO:0006801)	6	2	0.7866	+	1
ensheathment of neurons (GO:0007272)	6	1	0.7866	+	1
negative regulation of glial cell proliferation (GO:0060253)	6	2	0.7866	+	1
dopamine receptor signaling pathway (GO:0007212)	6	1	0.7866	+	1
ubiquinone biosynthetic process (GO:0006744)	6	3	0.7866	+	1
ubiquinone metabolic process (GO:0006743)	6	3	0.7866	+	1
specification of axis polarity (GO:0065001)	6	3	0.7866	+	1
female somatic sex determination (GO:0019101)	6	2	0.7866	+	1
female meiosis II (GO:0007147)	6	2	0.7866	+	1
amine catabolic process (GO:0009310)	6	1	0.7866	+	1
hydrogen peroxide catabolic process (GO:0042744)	6	2	0.7866	+	1
hydrogen peroxide metabolic process (GO:0042743)	6	2	0.7866	+	1
negative regulation of mRNA metabolic process (GO:1903312)	6	2	0.7866	+	1
snRNA transcription (GO:0009301)	6	2	0.7866	+	1
SREBP signaling pathway (GO:0032933)	6	2	0.7866	+	1
protein targeting to vacuole (GO:0006623)	6	1	0.7866	+	1
SRP-dependent cotranslational protein targeting to membrane, translocation (GO:0006616)	6	1	0.7866	+	1
mitotic spindle stabilization (GO:0043148)	6	2	0.7866	+	1
autophagic vacuole assembly (GO:0000045)	6	2	0.7866	+	1
regulation of DNA recombination (GO:0000018)	6	1	0.7866	+	1
coenzyme A metabolic process (GO:0015936)	6	1	0.7866	+	1
deoxyribonucleotide metabolic process (GO:0009262)	6	3	0.7866	+	1
guanosine-containing compound biosynthetic process (GO:1901070)	6	3	0.7866	+	1
spindle assembly involved in male meiosis (GO:0007053)	6	2	0.7866	+	1
nucleotide-sugar biosynthetic process (GO:0009226)	6	2	0.7866	+	1
reflex (GO:0060004)	6	1	0.7866	+	1
distributive segregation (GO:0032837)	6	2	0.7866	+	1
polyamine metabolic process (GO:0006595)	6	2	0.7866	+	1
mitochondrion transport along microtubule (GO:0047497)	6	1	0.7866	+	1
cellular response to sterol depletion (GO:0071501)	6	2	0.7866	+	1
glutamate biosynthetic process (GO:0006537)	6	3	0.7866	+	1
regulation of apoptotic signaling pathway (GO:2001233)	6	3	0.7866	+	1
myosin filament assembly (GO:0031034)	6	1	0.7866	+	1
myosin filament organization (GO:0031033)	6	1	0.7866	+	1
meiotic cell cycle phase transition (GO:0044771)	6	1	0.7866	+	1
pyrimidine nucleoside triphosphate metabolic process (GO:0009147)	6	2	0.7866	+	1
nucleotide phosphorylation (GO:0046939)	6	3	0.7866	+	1
nuclear body organization (GO:0030575)	6	1	0.7866	+	1
protein deacetylation (GO:0006476)	6	4	0.7866	+	1
signal peptide processing (GO:0006465)	6	2	0.7866	+	1
attachment of spindle microtubules to kinetochore (GO:0008608)	6	2	0.7866	+	1
negative regulation of gliogenesis (GO:0014014)	6	2	0.7866	+	1
translational termination (GO:0006415)	6	1	0.7866	+	1
meiotic sister chromatid segregation (GO:0045144)	6	1	0.7866	+	1
small RNA loading onto RISC (GO:0070922)	6	1	0.7866	+	1
regulation of protein localization to plasma membrane (GO:1903076)	6	2	0.7866	+	1
cellular biogenic amine catabolic process (GO:0042402)	6	1	0.7866	+	1
single-organism membrane budding (GO:1902591)	6	3	0.7866	+	1
transcription from mitochondrial promoter (GO:0006390)	6	4	0.7866	+	1
protein prenylation (GO:0018342)	6	4	0.7866	+	1
transcription elongation from RNA polymerase II promoter (GO:0006368)	6	2	0.7866	+	1
transcription from RNA polymerase I promoter (GO:0006360)	6	1	0.7866	+	1
double-strand break repair via nonhomologous end joining (GO:0006303)	6	2	0.7866	+	1
double-strand break repair via synthesis-dependent strand annealing (GO:0045003)	6	3	0.7866	+	1
negative regulation of hemocyte proliferation (GO:0035207)	6	1	0.7866	+	1
positive regulation of retrograde axon cargo transport (GO:2001019)	6	2	0.7866	+	1
regulation of retrograde axon cargo transport (GO:2001017)	6	2	0.7866	+	1
water-soluble vitamin biosynthetic process (GO:0042364)	6	2	0.7866	+	1
cellular response to cadmium ion (GO:0071276)	6	3	0.7866	+	1
cellular response to metal ion (GO:0071248)	6	3	0.7866	+	1
cellular response to arsenic-containing substance (GO:0071243)	6	3	0.7866	+	1
establishment of mitochondrion localization (GO:0051654)	6	1	0.7866	+	1
peptidyl-serine modification (GO:0018209)	6	1	0.7866	+	1
syncytial nuclear migration (GO:0035190)	6	3	0.7866	+	1
regulation of DNA-dependent DNA replication (GO:0090329)	6	1	0.7866	+	1
prenylation (GO:0097354)	6	4	0.7866	+	1
heart formation (GO:0060914)	6	1	0.7866	+	1
establishment of mitochondrion localization, microtubule-mediated (GO:0034643)	6	1	0.7866	+	1
axon ensheathment (GO:0008366)	6	1	0.7866	+	1
'de novo' IMP biosynthetic process (GO:0006189)	6	1	0.7866	+	1
peptidyl-serine phosphorylation (GO:0018105)	6	1	0.7866	+	1
meiotic G2/MI transition (GO:0008315)	6	1	0.7866	+	1
pteridine metabolic process (GO:0019889)	6	2	0.7866	+	1
fumarate metabolic process (GO:0006106)	6	1	0.7866	+	1
negative regulation of photoreceptor cell differentiation (GO:0046533)	6	1	0.7866	+	1
protein localization to kinetochore (GO:0034501)	6	2	0.7866	+	1
regulation of ubiquitin-protein transferase activity (GO:0051438)	6	1	0.7866	+	1
DNA catabolic process, exonucleolytic (GO:0000738)	6	2	0.7866	+	1
positive regulation of mitochondrial fission (GO:0090141)	6	1	0.7866	+	1
regulation of mitochondrial fission (GO:0090140)	6	1	0.7866	+	1
mitochondrion morphogenesis (GO:0070584)	6	1	0.7866	+	1
epithelial cell-cell adhesion (GO:0090136)	6	1	0.7866	+	1
polarity specification of dorsal/ventral axis (GO:0009951)	6	3	0.7866	+	1
positive regulation of muscle organ development (GO:0048636)	6	2	0.7866	+	1
perineurial glial growth (GO:0042066)	6	1	0.7866	+	1
protein-DNA complex remodeling (GO:0001120)	6	5	0.7866	+	1
transcriptional open complex formation at RNA polymerase II promoter (GO:0001113)	6	5	0.7866	+	1
DNA-templated transcriptional open complex formation (GO:0001112)	6	5	0.7866	+	1
establishment of protein localization to vacuole (GO:0072666)	6	1	0.7866	+	1
protein localization to vacuole (GO:0072665)	6	1	0.7866	+	1
central nervous system projection neuron axonogenesis (GO:0021952)	6	1	0.7866	+	1
regulation of establishment of protein localization to plasma membrane (GO:0090003)	6	2	0.7866	+	1
proboscis extension reflex (GO:0007637)	6	1	0.7866	+	1
amino sugar biosynthetic process (GO:0046349)	6	2	0.7866	+	1
macromolecular complex remodeling (GO:0034367)	6	5	0.7866	+	1
poly(A)+ mRNA export from nucleus (GO:0016973)	6	1	0.7866	+	1
regulation of protein tyrosine kinase activity (GO:0061097)	6	1	0.7866	+	1
protein desumoylation (GO:0016926)	6	1	0.7866	+	1
synaptic vesicle fusion to presynaptic membrane (GO:0031629)	6	2	0.7866	+	1
primary sex determination, germ-line (GO:0007542)	6	1	0.7866	+	1
sex determination, primary response to X:A ratio (GO:0007541)	6	2	0.7866	+	1
cellular response to hydrogen peroxide (GO:0070301)	6	2	0.7866	+	1
negative regulation of peptidyl-tyrosine phosphorylation (GO:0050732)	6	1	0.7866	+	1
meiotic sister chromatid cohesion (GO:0051177)	6	1	0.7866	+	1
negative regulation of mRNA processing (GO:0050686)	6	2	0.7866	+	1
response to symbiont (GO:0009608)	6	1	0.7866	+	1
response to sterol depletion (GO:0006991)	6	2	0.7866	+	1
determination of digestive tract left/right asymmetry (GO:0071907)	6	2	0.7866	+	1
response to X-ray (GO:0010165)	6	2	0.7866	+	1
regulation of endosome size (GO:0051036)	6	2	0.7866	+	1
zygotic specification of dorsal/ventral axis (GO:0007352)	6	2	0.7866	+	1
IMP metabolic process (GO:0046040)	7	1	0.9176	+	1
endoplasmic reticulum unfolded protein response (GO:0030968)	7	3	0.9176	+	1
purine nucleoside bisphosphate metabolic process (GO:0034032)	7	1	0.9176	+	1
iron ion transport (GO:0006826)	7	1	0.9176	+	1
establishment of body hair or bristle planar orientation (GO:0048104)	7	2	0.9176	+	1
negative regulation of actin filament polymerization (GO:0030837)	7	3	0.9176	+	1
histone demethylation (GO:0016577)	7	1	0.9176	+	1
heme biosynthetic process (GO:0006783)	7	3	0.9176	+	1
porphyrin-containing compound biosynthetic process (GO:0006779)	7	3	0.9176	+	1
Mo-molybdopterin cofactor biosynthetic process (GO:0006777)	7	4	0.9176	+	1
folic acid-containing compound metabolic process (GO:0006760)	7	1	0.9176	+	1
rRNA modification (GO:0000154)	7	5	0.9176	+	1
female meiosis I (GO:0007144)	7	2	0.9176	+	1
negative regulation of chromatin modification (GO:1903309)	7	2	0.9176	+	1
glycosphingolipid metabolic process (GO:0006687)	7	2	0.9176	+	1
protein targeting to peroxisome (GO:0006625)	7	3	0.9176	+	1
positive regulation of cell cycle G1/S phase transition (GO:1902808)	7	2	0.9176	+	1
non-canonical Wnt signaling pathway (GO:0035567)	7	2	0.9176	+	1
activation of innate immune response (GO:0002218)	7	1	0.9176	+	1
hypoxanthine salvage (GO:0043103)	7	1	0.9176	+	1
amino acid salvage (GO:0043102)	7	3	0.9176	+	1
phospholipid transport (GO:0015914)	7	1	0.9176	+	1
neuron projection regeneration (GO:0031102)	7	1	0.9176	+	1
cell cycle arrest (GO:0007050)	7	2	0.9176	+	1
nucleotide-sugar metabolic process (GO:0009225)	7	2	0.9176	+	1
proline metabolic process (GO:0006560)	7	1	0.9176	+	1
positive regulation of lamellipodium organization (GO:1902745)	7	2	0.9176	+	1
membrane protein ectodomain proteolysis (GO:0006509)	7	1	0.9176	+	1
neutral amino acid transport (GO:0015804)	7	1	0.9176	+	1
vitamin biosynthetic process (GO:0009110)	7	2	0.9176	+	1
paracrine signaling (GO:0038001)	7	2	0.9176	+	1
positive regulation of macroautophagy (GO:0016239)	7	1	0.9176	+	1
lamellipodium organization (GO:0097581)	7	2	0.9176	+	1
negative regulation of RNA splicing (GO:0033119)	7	2	0.9176	+	1
methionine biosynthetic process (GO:0009086)	7	3	0.9176	+	1
branched-chain amino acid metabolic process (GO:0009081)	7	2	0.9176	+	1
ER-associated ubiquitin-dependent protein catabolic process (GO:0030433)	7	3	0.9176	+	1
behavioral response to nutrient (GO:0051780)	7	1	0.9176	+	1
tRNA splicing, via endonucleolytic cleavage and ligation (GO:0006388)	7	3	0.9176	+	1
regulation of chromatin assembly (GO:0010847)	7	1	0.9176	+	1
regulation of transcription from RNA polymerase I promoter (GO:0006356)	7	4	0.9176	+	1
DNA-templated transcription, elongation (GO:0006354)	7	2	0.9176	+	1
gonad morphogenesis (GO:0035262)	7	1	0.9176	+	1
sperm mitochondrion organization (GO:0030382)	7	3	0.9176	+	1
L-methionine salvage (GO:0071267)	7	3	0.9176	+	1
L-methionine biosynthetic process (GO:0071265)	7	3	0.9176	+	1
cellular response to inorganic substance (GO:0071241)	7	3	0.9176	+	1
base-excision repair (GO:0006284)	7	1	0.9176	+	1
cellular response to acid chemical (GO:0071229)	7	1	0.9176	+	1
pre-replicative complex assembly involved in nuclear cell cycle DNA replication (GO:0006267)	7	4	0.9176	+	1
DNA topological change (GO:0006265)	7	2	0.9176	+	1
mitochondrial RNA metabolic process (GO:0000959)	7	4	0.9176	+	1
production of miRNAs involved in gene silencing by miRNA (GO:0035196)	7	1	0.9176	+	1
negative regulation of gene silencing by RNA (GO:0060967)	7	1	0.9176	+	1
homeostasis of number of cells (GO:0048872)	7	1	0.9176	+	1
response to cadmium ion (GO:0046686)	7	3	0.9176	+	1
regulation of fibroblast growth factor receptor signaling pathway (GO:0040036)	7	1	0.9176	+	1
regulation of meiosis (GO:0040020)	7	1	0.9176	+	1
positive regulation of Wnt protein secretion (GO:0061357)	7	3	0.9176	+	1
regulation of Wnt protein secretion (GO:0061356)	7	3	0.9176	+	1
IMP biosynthetic process (GO:0006188)	7	1	0.9176	+	1
adenosine catabolic process (GO:0006154)	7	1	0.9176	+	1
positive regulation of canonical Wnt signaling pathway (GO:0090263)	7	2	0.9176	+	1
maintenance of apical/basal cell polarity (GO:0035090)	7	2	0.9176	+	1
cardiac muscle tissue development (GO:0048738)	7	2	0.9176	+	1
piRNA metabolic process (GO:0034587)	7	2	0.9176	+	1
nephrocyte filtration (GO:0097206)	7	2	0.9176	+	1
renal filtration (GO:0097205)	7	2	0.9176	+	1
protein localization to chromosome (GO:0034502)	7	2	0.9176	+	1
molybdopterin cofactor biosynthetic process (GO:0032324)	7	4	0.9176	+	1
positive regulation of lamellipodium assembly (GO:0010592)	7	2	0.9176	+	1
pre-replicative complex assembly involved in cell cycle DNA replication (GO:1902299)	7	4	0.9176	+	1
positive regulation of G1/S transition of mitotic cell cycle (GO:1900087)	7	2	0.9176	+	1
intracellular pH reduction (GO:0051452)	7	2	0.9176	+	1
N-acetylglucosamine metabolic process (GO:0006044)	7	3	0.9176	+	1
resolution of meiotic recombination intermediates (GO:0000712)	7	2	0.9176	+	1
negative regulation of cardioblast cell fate specification (GO:0009997)	7	1	0.9176	+	1
Mo-molybdopterin cofactor metabolic process (GO:0019720)	7	4	0.9176	+	1
intraciliary transport (GO:0042073)	7	1	0.9176	+	1
detection of light stimulus involved in visual perception (GO:0050908)	7	1	0.9176	+	1
glial cell growth (GO:0042065)	7	1	0.9176	+	1
cellular acyl-CoA homeostasis (GO:0042049)	7	1	0.9176	+	1
positive regulation of feeding behavior (GO:2000253)	7	2	0.9176	+	1
positive regulation of reproductive process (GO:2000243)	7	2	0.9176	+	1
regulation of actin filament bundle assembly (GO:0032231)	7	3	0.9176	+	1
lamellipodium assembly (GO:0030032)	7	2	0.9176	+	1
kinetochore organization (GO:0051383)	7	1	0.9176	+	1
cellular anion homeostasis (GO:0030002)	7	1	0.9176	+	1
negative regulation of response to biotic stimulus (GO:0002832)	7	1	0.9176	+	1
regulation of ligase activity (GO:0051340)	7	1	0.9176	+	1
NAD metabolic process (GO:0019674)	7	1	0.9176	+	1
establishment of protein localization to peroxisome (GO:0072663)	7	3	0.9176	+	1
protein localization to peroxisome (GO:0072662)	7	3	0.9176	+	1
central nervous system neuron axonogenesis (GO:0021955)	7	1	0.9176	+	1
quinone biosynthetic process (GO:1901663)	7	3	0.9176	+	1
quinone metabolic process (GO:1901661)	7	3	0.9176	+	1
imaginal disc-derived wing expansion (GO:0048526)	7	1	0.9176	+	1
lipid particle organization (GO:0034389)	7	1	0.9176	+	1
positive regulation of response to nutrient levels (GO:0032109)	7	1	0.9176	+	1
positive regulation of response to extracellular stimulus (GO:0032106)	7	1	0.9176	+	1
pH reduction (GO:0045851)	7	2	0.9176	+	1
positive regulation of cellular component movement (GO:0051272)	7	2	0.9176	+	1
engulfment of apoptotic cell (GO:0043652)	7	1	0.9176	+	1
dicarboxylic acid biosynthetic process (GO:0043650)	7	3	0.9176	+	1
ribonucleoside bisphosphate metabolic process (GO:0033875)	7	1	0.9176	+	1
nucleoside bisphosphate metabolic process (GO:0033865)	7	1	0.9176	+	1
pyrimidine-containing compound catabolic process (GO:0072529)	7	1	0.9176	+	1
L-methionine biosynthetic process from methylthioadenosine (GO:0019509)	7	3	0.9176	+	1
hemocyte development (GO:0007516)	7	2	0.9176	+	1
negative regulation of cardiac cell fate specification (GO:2000044)	7	1	0.9176	+	1
prosthetic group metabolic process (GO:0051189)	7	4	0.9176	+	1
cofactor transport (GO:0051181)	7	2	0.9176	+	1
peroxisomal transport (GO:0043574)	7	3	0.9176	+	1
molybdopterin cofactor metabolic process (GO:0043545)	7	4	0.9176	+	1
regulation of JUN kinase activity (GO:0043506)	7	1	0.9176	+	1
response to salt stress (GO:0009651)	7	1	0.9176	+	1
epithelial cell fate determination, open tracheal system (GO:0007425)	7	1	0.9176	+	1
pre-replicative complex assembly (GO:0036388)	7	4	0.9176	+	1
germ-line sex determination (GO:0018992)	7	1	0.9176	+	1
pyrimidine nucleoside biosynthetic process (GO:0046134)	7	2	0.9176	+	1
pyrimidine ribonucleoside biosynthetic process (GO:0046132)	7	2	0.9176	+	1
intestinal stem cell homeostasis (GO:0036335)	7	1	0.9176	+	1
inosine biosynthetic process (GO:0046103)	7	1	0.9176	+	1
inosine metabolic process (GO:0046102)	7	1	0.9176	+	1
hypoxanthine biosynthetic process (GO:0046101)	7	1	0.9176	+	1
hypoxanthine metabolic process (GO:0046100)	7	1	0.9176	+	1
nuclear pore organization (GO:0006999)	7	3	0.9176	+	1
positive regulation of R7 cell differentiation (GO:0045678)	7	2	0.9176	+	1
organelle transport along microtubule (GO:0072384)	7	2	0.9176	+	1
regulation of heterochromatin assembly (GO:0031445)	7	1	0.9176	+	1
regulation of mRNA 3'-end processing (GO:0031440)	7	1	0.9176	+	1
pyridine nucleotide biosynthetic process (GO:0019363)	7	2	0.9176	+	1
nicotinamide nucleotide biosynthetic process (GO:0019359)	7	2	0.9176	+	1
specification of segmental identity, abdomen (GO:0007385)	7	1	0.9176	+	1
positive regulation of receptor-mediated endocytosis (GO:0048260)	7	1	0.9176	+	1
adenosine metabolic process (GO:0046085)	7	1	0.9176	+	1
oocyte nucleus migration involved in oocyte dorsal/ventral axis specification (GO:0007312)	7	1	0.9176	+	1
contractile ring contraction (GO:0036213)	8	4	1.049	+	1
nucleotide transport (GO:0006862)	8	1	1.049	-	1
positive regulation of imaginal disc growth (GO:0045572)	8	2	1.049	+	1
negative regulation of protein complex assembly (GO:0031333)	8	3	1.049	+	1
vitellogenesis (GO:0007296)	8	2	1.049	+	1
regulation of mitotic spindle organization (GO:0060236)	8	2	1.049	+	1
response to water (GO:0009415)	8	1	1.049	-	1
histone deubiquitination (GO:0016578)	8	2	1.049	+	1
histone phosphorylation (GO:0016572)	8	4	1.049	+	1
porphyrin-containing compound metabolic process (GO:0006778)	8	4	1.049	+	1
glutathione biosynthetic process (GO:0006750)	8	1	1.049	-	1
NADPH regeneration (GO:0006740)	8	5	1.049	+	1
regulation of nurse cell apoptotic process (GO:0045477)	8	2	1.049	+	1
chromatin-mediated maintenance of transcription (GO:0048096)	8	2	1.049	+	1
nucleosome mobilization (GO:0042766)	8	1	1.049	-	1
mating behavior, sex discrimination (GO:0048047)	8	1	1.049	-	1
amine biosynthetic process (GO:0009309)	8	1	1.049	-	1
meiosis II cytokinesis (GO:0007111)	8	1	1.049	-	1
ceramide metabolic process (GO:0006672)	8	1	1.049	-	1
acyl-CoA biosynthetic process (GO:0071616)	8	1	1.049	-	1
sulfur amino acid biosynthetic process (GO:0000097)	8	3	1.049	+	1
activation of immune response (GO:0002253)	8	1	1.049	-	1
regulation of SNARE complex assembly (GO:0035542)	8	2	1.049	+	1
regulation of cardioblast cell fate specification (GO:0042686)	8	1	1.049	-	1
mitotic sister chromatid cohesion (GO:0007064)	8	3	1.049	+	1
pyrimidine ribonucleotide biosynthetic process (GO:0009220)	8	3	1.049	+	1
regulation of cellular pH (GO:0030641)	8	2	1.049	+	1
copper ion homeostasis (GO:0055070)	8	2	1.049	+	1
glycine catabolic process (GO:0006546)	8	3	1.049	+	1
purine nucleobase salvage (GO:0043096)	8	1	1.049	-	1
nuclear cell cycle DNA replication (GO:0033260)	8	5	1.049	+	1
regulation of peptidyl-lysine acetylation (GO:2000756)	8	3	1.049	+	1
cellular response to gamma radiation (GO:0071480)	8	1	1.049	-	1
negative regulation of transforming growth factor beta receptor signaling pathway (GO:0030512)	8	1	1.049	-	1
protein demethylation (GO:0006482)	8	1	1.049	-	1
thioester biosynthetic process (GO:0035384)	8	1	1.049	-	1
demethylation (GO:0070988)	8	1	1.049	-	1
hippo signaling (GO:0035329)	8	2	1.049	+	1
serine family amino acid catabolic process (GO:0009071)	8	3	1.049	+	1
positive regulation of proteolysis involved in cellular protein catabolic process (GO:1903052)	8	3	1.049	+	1
cellular biogenic amine biosynthetic process (GO:0042401)	8	1	1.049	-	1
histone mRNA 3'-end processing (GO:0006398)	8	3	1.049	+	1
positive regulation of mitochondrion organization (GO:0010822)	8	1	1.049	-	1
specification of segmental identity, trunk (GO:0035292)	8	1	1.049	-	1
heterochromatin organization involved in chromatin silencing (GO:0070868)	8	2	1.049	+	1
peripheral nervous system neuron development (GO:0048935)	8	2	1.049	+	1
peripheral nervous system neuron differentiation (GO:0048934)	8	2	1.049	+	1
mismatch repair (GO:0006298)	8	1	1.049	-	1
DNA strand elongation involved in DNA replication (GO:0006271)	8	1	1.049	-	1
actomyosin contractile ring contraction (GO:0000916)	8	4	1.049	+	1
regulation of protein acetylation (GO:1901983)	8	3	1.049	+	1
negative regulation of compound eye retinal cell programmed cell death (GO:0046673)	8	2	1.049	+	1
negative regulation of retinal cell programmed cell death (GO:0046671)	8	2	1.049	+	1
endocytic recycling (GO:0032456)	8	2	1.049	+	1
positive regulation of proteasomal ubiquitin-dependent protein catabolic process (GO:0032436)	8	3	1.049	+	1
DNA strand elongation (GO:0022616)	8	1	1.049	-	1
chondroitin sulfate biosynthetic process (GO:0030206)	8	2	1.049	+	1
chondroitin sulfate metabolic process (GO:0030204)	8	2	1.049	+	1
histone mRNA metabolic process (GO:0008334)	8	3	1.049	+	1
induction of programmed cell death by hormones (GO:0035081)	8	1	1.049	-	1
induction of programmed cell death by ecdysone (GO:0035078)	8	1	1.049	-	1
ecdysone-mediated induction of salivary gland cell autophagic cell death (GO:0035072)	8	1	1.049	-	1
regulation of histone acetylation (GO:0035065)	8	3	1.049	+	1
positive regulation of proteasomal protein catabolic process (GO:1901800)	8	3	1.049	+	1
heme metabolic process (GO:0042168)	8	4	1.049	+	1
regulation of terminal button organization (GO:2000331)	8	1	1.049	-	1
sphingolipid biosynthetic process (GO:0030148)	8	3	1.049	+	1
pentose-phosphate shunt (GO:0006098)	8	5	1.049	+	1
regulation of intracellular pH (GO:0051453)	8	2	1.049	+	1
protein dealkylation (GO:0008214)	8	1	1.049	-	1
non-recombinational repair (GO:0000726)	8	2	1.049	+	1
dendrite self-avoidance (GO:0070593)	8	2	1.049	+	1
positive chemotaxis (GO:0050918)	8	1	1.049	-	1
negative regulation of protein polymerization (GO:0032272)	8	3	1.049	+	1
positive regulation of cell-cell adhesion (GO:0022409)	8	2	1.049	+	1
cellular monovalent inorganic cation homeostasis (GO:0030004)	8	2	1.049	+	1
regulation of decapentaplegic signaling pathway (GO:0090097)	8	1	1.049	-	1
regulation of antifungal peptide biosynthetic process (GO:0002810)	8	1	1.049	-	1
regulation of organelle assembly (GO:1902115)	8	1	1.049	-	1
positive regulation of metaphase/anaphase transition of cell cycle (GO:1902101)	8	1	1.049	-	1
meiotic chromosome separation (GO:0051307)	8	3	1.049	+	1
central nervous system neuron development (GO:0021954)	8	1	1.049	-	1
central nervous system neuron differentiation (GO:0021953)	8	1	1.049	-	1
ectodermal digestive tract morphogenesis (GO:0048567)	8	4	1.049	+	1
regulation of microtubule-based movement (GO:0060632)	8	2	1.049	+	1
jump response (GO:0007630)	8	2	1.049	+	1
positive regulation of synaptic transmission (GO:0050806)	8	1	1.049	-	1
negative regulation of growth of symbiont involved in interaction with host (GO:0044146)	8	2	1.049	+	1
modulation of growth of symbiont involved in interaction with host (GO:0044144)	8	2	1.049	+	1
negative regulation of growth of symbiont in host (GO:0044130)	8	2	1.049	+	1
regulation of growth of symbiont in host (GO:0044126)	8	2	1.049	+	1
negative regulation of neural precursor cell proliferation (GO:2000178)	8	2	1.049	+	1
mesodermal cell migration (GO:0008078)	8	1	1.049	-	1
positive regulation of mitotic metaphase/anaphase transition (GO:0045842)	8	1	1.049	-	1
positive regulation of mitosis (GO:0045840)	8	1	1.049	-	1
inositol phosphate metabolic process (GO:0043647)	8	1	1.049	-	1
induction of programmed cell death (GO:0012502)	8	1	1.049	-	1
morphogenesis of an epithelial fold (GO:0060571)	8	1	1.049	-	1
positive regulation of dendrite morphogenesis (GO:0050775)	8	3	1.049	+	1
regulation of cardiac cell fate specification (GO:2000043)	8	1	1.049	-	1
positive regulation of cell adhesion (GO:0045785)	8	2	1.049	+	1
chondroitin sulfate proteoglycan metabolic process (GO:0050654)	8	2	1.049	+	1
chondroitin sulfate proteoglycan biosynthetic process (GO:0050650)	8	2	1.049	+	1
oenocyte development (GO:0007438)	8	2	1.049	+	1
negative regulation of neuroblast proliferation (GO:0007406)	8	2	1.049	+	1
positive regulation of antifungal peptide biosynthetic process (GO:0006967)	8	1	1.049	-	1
RNA splicing, via endonucleolytic cleavage and ligation (GO:0000394)	8	3	1.049	+	1
histone exchange (GO:0043486)	8	1	1.049	-	1
membrane protein proteolysis (GO:0033619)	8	1	1.049	-	1
maternal specification of dorsal/ventral axis, oocyte, germ-line encoded (GO:0007311)	8	2	1.049	+	1
cellular iron ion homeostasis (GO:0006879)	9	1	1.18	-	1
negative regulation of imaginal disc growth (GO:0045571)	9	1	1.18	-	1
sevenless signaling pathway (GO:0045500)	9	3	1.18	+	1
growth of a germarium-derived egg chamber (GO:0007295)	9	1	1.18	-	1
behavioral response to cocaine (GO:0048148)	9	3	1.18	+	1
protein kinase C-activating G-protein coupled receptor signaling pathway (GO:0007205)	9	2	1.18	+	1
pheromone metabolic process (GO:0042810)	9	2	1.18	+	1
basement membrane organization (GO:0071711)	9	1	1.18	-	1
water-soluble vitamin metabolic process (GO:0006767)	9	3	1.18	+	1
mucosal immune response (GO:0002385)	9	1	1.18	-	1
nonribosomal peptide biosynthetic process (GO:0019184)	9	1	1.18	-	1
female germ-line stem cell maintenance (GO:0036099)	9	1	1.18	-	1
meiosis I cytokinesis (GO:0007110)	9	1	1.18	-	1
establishment of oocyte nucleus localization involved in oocyte dorsal/ventral axis specification (GO:0030722)	9	2	1.18	+	1
protein export from nucleus (GO:0006611)	9	4	1.18	+	1
organ or tissue specific immune response (GO:0002251)	9	1	1.18	-	1
NLS-bearing protein import into nucleus (GO:0006607)	9	5	1.18	+	1
entrainment of circadian clock by photoperiod (GO:0043153)	9	1	1.18	-	1
receptor metabolic process (GO:0043112)	9	2	1.18	+	1
anaphase-promoting complex-dependent proteasomal ubiquitin-dependent protein catabolic process (GO:0031145)	9	2	1.18	+	1
mitochondrial genome maintenance (GO:0000002)	9	2	1.18	+	1
oenocyte differentiation (GO:0001742)	9	2	1.18	+	1
pyrimidine ribonucleotide metabolic process (GO:0009218)	9	3	1.18	+	1
morphogenesis of larval imaginal disc epithelium (GO:0016335)	9	1	1.18	-	1
peptide biosynthetic process (GO:0043043)	9	1	1.18	-	1
negative regulation of chromosome organization (GO:2001251)	9	3	1.18	+	1
nucleoside diphosphate metabolic process (GO:0009132)	9	4	1.18	+	1
pseudocleavage involved in syncytial blastoderm formation (GO:0030589)	9	6	1.18	+	1
pseudocleavage (GO:0030588)	9	6	1.18	+	1
regulation of cardioblast differentiation (GO:0051890)	9	1	1.18	-	1
protein ADP-ribosylation (GO:0006471)	9	1	1.18	-	1
protein autoubiquitination (GO:0051865)	9	2	1.18	+	1
regulation of protein dephosphorylation (GO:0035304)	9	2	1.18	+	1
aspartate family amino acid biosynthetic process (GO:0009067)	9	4	1.18	+	1
phosphatidylinositol dephosphorylation (GO:0046856)	9	3	1.18	+	1
filopodium assembly (GO:0046847)	9	1	1.18	-	1
branched duct epithelial cell fate determination, open tracheal system (GO:0046845)	9	1	1.18	-	1
phospholipid dephosphorylation (GO:0046839)	9	3	1.18	+	1
negative regulation of nucleocytoplasmic transport (GO:0046823)	9	1	1.18	-	1
male gonad development (GO:0008584)	9	1	1.18	-	1
production of siRNA involved in RNA interference (GO:0030422)	9	1	1.18	-	1
positive regulation of nuclear division (GO:0051785)	9	1	1.18	-	1
respiratory chain complex IV assembly (GO:0008535)	9	3	1.18	+	1
plasmatocyte differentiation (GO:0042387)	9	1	1.18	-	1
rhodopsin biosynthetic process (GO:0016063)	9	2	1.18	+	1
pyrimidine nucleobase metabolic process (GO:0006206)	9	1	1.18	-	1
negative regulation of intracellular protein transport (GO:0090317)	9	1	1.18	-	1
positive regulation of compound eye retinal cell programmed cell death (GO:0046672)	9	3	1.18	+	1
positive regulation of retinal cell programmed cell death (GO:0046670)	9	3	1.18	+	1
ribosomal small subunit biogenesis (GO:0042274)	9	1	1.18	-	1
negative regulation of multicellular organism growth (GO:0040015)	9	1	1.18	-	1
endosome to lysosome transport (GO:0008333)	9	2	1.18	+	1
regulation of defense response to fungus (GO:1900150)	9	1	1.18	-	1
ecdysone receptor-mediated signaling pathway (GO:0035076)	9	2	1.18	+	1
malate metabolic process (GO:0006108)	9	1	1.18	-	1
negative regulation of chromatin silencing (GO:0031936)	9	2	1.18	+	1
development of primary male sexual characteristics (GO:0046546)	9	1	1.18	-	1
glucose catabolic process (GO:0006007)	9	5	1.18	+	1
regulation of post-embryonic development (GO:0048580)	9	1	1.18	-	1
adherens junction maintenance (GO:0034334)	9	2	1.18	+	1
regulation of antifungal peptide production (GO:0002788)	9	1	1.18	-	1
cyclin catabolic process (GO:0008054)	9	3	1.18	+	1
regulation of peptidyl-tyrosine phosphorylation (GO:0050730)	9	1	1.18	-	1
positive regulation of TOR signaling (GO:0032008)	9	2	1.18	+	1
histoblast morphogenesis (GO:0007488)	9	1	1.18	-	1
progression of morphogenetic furrow involved in compound eye morphogenesis (GO:0007458)	9	1	1.18	-	1
ectodermal digestive tract development (GO:0007439)	9	4	1.18	+	1
negative regulation of hemocyte differentiation (GO:0045611)	9	1	1.18	-	1
chromosome organization involved in meiosis (GO:0070192)	9	1	1.18	-	1
response to anesthetic (GO:0072347)	9	1	1.18	-	1
regulation of exocytosis (GO:0017157)	9	1	1.18	-	1
egg activation (GO:0007343)	9	1	1.18	-	1
regulation of receptor-mediated endocytosis (GO:0048259)	9	1	1.18	-	1
copper ion transport (GO:0006825)	10	2	1.311	+	1
phosphate ion transport (GO:0006817)	10	1	1.311	-	1
polysaccharide biosynthetic process (GO:0000271)	10	1	1.311	-	1
positive regulation of protein ubiquitination (GO:0031398)	10	2	1.311	+	1
spermatid nucleus differentiation (GO:0007289)	10	1	1.311	-	1
positive regulation of cAMP biosynthetic process (GO:0030819)	10	1	1.311	-	1
positive regulation of cAMP metabolic process (GO:0030816)	10	1	1.311	-	1
positive regulation of nucleotide biosynthetic process (GO:0030810)	10	1	1.311	-	1
positive regulation of cyclic nucleotide biosynthetic process (GO:0030804)	10	1	1.311	-	1
positive regulation of cyclic nucleotide metabolic process (GO:0030801)	10	1	1.311	-	1
R8 cell fate specification (GO:0045464)	10	1	1.311	-	1
activation of MAPK activity (GO:0000187)	10	1	1.311	-	1
positive regulation of ERBB signaling pathway (GO:1901186)	10	3	1.311	+	1
positive regulation of protein modification by small protein conjugation or removal (GO:1903322)	10	2	1.311	+	1
positive regulation of protein maturation (GO:1903319)	10	4	1.311	+	1
endomitotic cell cycle (GO:0007113)	10	2	1.311	+	1
TORC1 signaling (GO:0038202)	10	2	1.311	+	1
ecdysone biosynthetic process (GO:0006697)	10	1	1.311	-	1
ovarian fusome organization (GO:0030723)	10	2	1.311	+	1
germarium-derived female germ-line cyst encapsulation (GO:0030708)	10	3	1.311	+	1
ubiquitin-dependent protein catabolic process via the multivesicular body sorting pathway (GO:0043162)	10	6	1.311	+	1
positive regulation of defense response to virus by host (GO:0002230)	10	5	1.311	+	1
cell activation (GO:0001775)	10	1	1.311	-	1
male meiosis chromosome segregation (GO:0007060)	10	2	1.311	+	1
optic lobe placode development (GO:0001748)	10	1	1.311	-	1
anion homeostasis (GO:0055081)	10	1	1.311	-	1
iron ion homeostasis (GO:0055072)	10	1	1.311	-	1
second mitotic wave involved in compound eye morphogenesis (GO:0016330)	10	1	1.311	-	1
methionine metabolic process (GO:0006555)	10	4	1.311	+	1
glycine metabolic process (GO:0006544)	10	3	1.311	+	1
positive regulation of purine nucleotide metabolic process (GO:1900544)	10	1	1.311	-	1
regulation of chromatin assembly or disassembly (GO:0001672)	10	2	1.311	+	1
response to hydrogen peroxide (GO:0042542)	10	4	1.311	+	1
cellular response to ionizing radiation (GO:0071479)	10	1	1.311	-	1
intracellular steroid hormone receptor signaling pathway (GO:0030518)	10	2	1.311	+	1
regulation of axon guidance (GO:1902667)	10	2	1.311	+	1
positive regulation of protein processing (GO:0010954)	10	4	1.311	+	1
carbohydrate transport (GO:0008643)	10	2	1.311	+	1
telomere capping (GO:0016233)	10	1	1.311	-	1
apical protein localization (GO:0045176)	10	1	1.311	-	1
monocarboxylic acid transport (GO:0015718)	10	2	1.311	+	1
dopamine metabolic process (GO:0042417)	10	1	1.311	-	1
mRNA splice site selection (GO:0006376)	10	6	1.311	+	1
positive regulation of purine nucleotide biosynthetic process (GO:1900373)	10	1	1.311	-	1
sensory organ precursor cell division (GO:0045035)	10	2	1.311	+	1
determination of genital disc primordium (GO:0035225)	10	1	1.311	-	1
cell competition in a multicellular organism (GO:0035212)	10	3	1.311	+	1
chorion-containing eggshell pattern formation (GO:0030381)	10	2	1.311	+	1
pyrimidine nucleotide biosynthetic process (GO:0006221)	10	5	1.311	+	1
larval lymph gland hemocyte differentiation (GO:0035168)	10	1	1.311	-	1
response to arsenic-containing substance (GO:0046685)	10	3	1.311	+	1
cellular response to unfolded protein (GO:0034620)	10	4	1.311	+	1
adult feeding behavior (GO:0008343)	10	1	1.311	-	1
negative regulation of cellular response to growth factor stimulus (GO:0090288)	10	1	1.311	-	1
positive regulation of photoreceptor cell differentiation (GO:0046534)	10	4	1.311	+	1
negative regulation of intracellular transport (GO:0032387)	10	1	1.311	-	1
retrograde transport, endosome to Golgi (GO:0042147)	10	4	1.311	+	1
regulation of ARF GTPase activity (GO:0032312)	10	2	1.311	+	1
positive regulation of transmembrane receptor protein serine/threonine kinase signaling pathway (GO:0090100)	10	1	1.311	-	1
antifungal humoral response (GO:0019732)	10	2	1.311	+	1
detection of light stimulus involved in sensory perception (GO:0050962)	10	1	1.311	-	1
cell migration involved in gastrulation (GO:0042074)	10	1	1.311	-	1
negative regulation of JAK-STAT cascade (GO:0046426)	10	3	1.311	+	1
positive regulation of nucleotide metabolic process (GO:0045981)	10	1	1.311	-	1
negative regulation of DNA replication (GO:0008156)	10	1	1.311	-	1
monosaccharide catabolic process (GO:0046365)	10	5	1.311	+	1
positive regulation of proteolysis (GO:0045862)	10	4	1.311	+	1
dorsal/ventral axis specification, ovarian follicular epithelium (GO:0008069)	10	3	1.311	+	1
eclosion rhythm (GO:0008062)	10	2	1.311	+	1
protein depolymerization (GO:0051261)	10	1	1.311	-	1
digestion (GO:0007586)	10	1	1.311	-	1
positive regulation of adenylate cyclase activity (GO:0045762)	10	1	1.311	-	1
positive regulation of epidermal growth factor receptor signaling pathway (GO:0045742)	10	3	1.311	+	1
regulation of DNA binding (GO:0051101)	10	2	1.311	+	1
haltere development (GO:0007482)	10	1	1.311	-	1
regulation of defense response to virus by host (GO:0050691)	10	5	1.311	+	1
photoperiodism (GO:0009648)	10	1	1.311	-	1
rhodopsin metabolic process (GO:0046154)	10	2	1.311	+	1
response to osmotic stress (GO:0006970)	10	2	1.311	+	1
cellular polysaccharide biosynthetic process (GO:0033692)	10	1	1.311	-	1
negative regulation of MAP kinase activity (GO:0043407)	10	3	1.311	+	1
hexose catabolic process (GO:0019320)	10	5	1.311	+	1
determination of left/right symmetry (GO:0007368)	10	3	1.311	+	1
pole plasm protein localization (GO:0007318)	10	1	1.311	-	1
regulation of pH (GO:0006885)	11	3	1.442	+	1
nuclear-transcribed mRNA catabolic process, deadenylation-dependent decay (GO:0000288)	11	1	1.442	-	1
neuron cellular homeostasis (GO:0070050)	11	3	1.442	+	1
cystoblast division (GO:0007282)	11	1	1.442	-	1
regulation of glial cell proliferation (GO:0060251)	11	5	1.442	+	1
regulation of transforming growth factor beta receptor signaling pathway (GO:0017015)	11	1	1.442	-	1
female germ-line cyst encapsulation (GO:0048139)	11	3	1.442	+	1
germ-line cyst encapsulation (GO:0048138)	11	3	1.442	+	1
polarized epithelial cell differentiation (GO:0030859)	11	1	1.442	-	1
vitamin metabolic process (GO:0006766)	11	3	1.442	+	1
sex comb development (GO:0045498)	11	3	1.442	+	1
terpenoid metabolic process (GO:0006721)	11	1	1.442	-	1
bicoid mRNA localization (GO:0045450)	11	3	1.442	+	1
retinal ganglion cell axon guidance (GO:0031290)	11	1	1.442	-	1
positive regulation of cyclase activity (GO:0031281)	11	1	1.442	-	1
adenylate cyclase-activating G-protein coupled receptor signaling pathway (GO:0007189)	11	1	1.442	-	1
male meiosis I (GO:0007141)	11	1	1.442	-	1
positive regulation of transcription elongation from RNA polymerase II promoter (GO:0032968)	11	1	1.442	-	1
acyl-CoA metabolic process (GO:0006637)	11	2	1.442	+	1
G2/M transition of mitotic cell cycle (GO:0000086)	11	5	1.442	+	1
spindle stabilization (GO:0043146)	11	3	1.442	+	1
purine-containing compound salvage (GO:0043101)	11	2	1.442	+	1
regulation of exit from mitosis (GO:0007096)	11	1	1.442	-	1
lysosome organization (GO:0007040)	11	2	1.442	+	1
endosome organization (GO:0007032)	11	3	1.442	+	1
microtubule nucleation (GO:0007020)	11	2	1.442	+	1
catecholamine metabolic process (GO:0006584)	11	1	1.442	-	1
monovalent inorganic cation homeostasis (GO:0055067)	11	3	1.442	+	1
glutamate metabolic process (GO:0006536)	11	3	1.442	+	1
amino acid import (GO:0043090)	11	1	1.442	-	1
regulation of histone methylation (GO:0031060)	11	3	1.442	+	1
response to caffeine (GO:0031000)	11	2	1.442	+	1
pteridine-containing compound biosynthetic process (GO:0042559)	11	2	1.442	+	1
purine nucleobase biosynthetic process (GO:0009113)	11	2	1.442	+	1
BMP signaling pathway (GO:0030509)	11	2	1.442	+	1
response to purine-containing compound (GO:0014074)	11	2	1.442	+	1
establishment of epithelial cell apical/basal polarity (GO:0045198)	11	1	1.442	-	1
synaptic target inhibition (GO:0016201)	11	1	1.442	-	1
thioester metabolic process (GO:0035383)	11	2	1.442	+	1
regulation of gliogenesis (GO:0014013)	11	5	1.442	+	1
negative regulation of stem cell proliferation (GO:2000647)	11	4	1.442	+	1
sterol biosynthetic process (GO:0016126)	11	2	1.442	+	1
chitin-based larval cuticle pattern formation (GO:0035293)	11	4	1.442	+	1
multicellular organism growth (GO:0035264)	11	1	1.442	-	1
haltere disc development (GO:0035216)	11	1	1.442	-	1
tetrapyrrole biosynthetic process (GO:0033014)	11	6	1.442	+	1
epithelial cell proliferation involved in renal tubule morphogenesis (GO:2001013)	11	1	1.442	-	1
pyrimidine nucleoside metabolic process (GO:0006213)	11	3	1.442	+	1
hemocyte proliferation (GO:0035172)	11	2	1.442	+	1
regulation of tube diameter, open tracheal system (GO:0035158)	11	3	1.442	+	1
tissue regeneration (GO:0042246)	11	3	1.442	+	1
female sex determination (GO:0030237)	11	3	1.442	+	1
histone H3 acetylation (GO:0043966)	11	3	1.442	+	1
epithelial cell proliferation involved in Malpighian tubule morphogenesis (GO:0061331)	11	1	1.442	-	1
regulation of canonical Wnt signaling pathway (GO:0060828)	11	3	1.442	+	1
muscle fiber development (GO:0048747)	11	1	1.442	-	1
glycosaminoglycan biosynthetic process (GO:0006024)	11	2	1.442	+	1
sensory perception of touch (GO:0050975)	11	2	1.442	+	1
regulation of chemotaxis (GO:0050920)	11	2	1.442	+	1
regulation of epithelial cell migration, open tracheal system (GO:2000274)	11	1	1.442	-	1
actin polymerization or depolymerization (GO:0008154)	11	4	1.442	+	1
decapentaplegic signaling pathway (GO:0008101)	11	3	1.442	+	1
cell junction maintenance (GO:0034331)	11	2	1.442	+	1
Arp2/3 complex-mediated actin nucleation (GO:0034314)	11	3	1.442	+	1
positive regulation of response to external stimulus (GO:0032103)	11	2	1.442	+	1
negative regulation of response to external stimulus (GO:0032102)	11	3	1.442	+	1
response to gamma radiation (GO:0010332)	11	1	1.442	-	1
catechol-containing compound metabolic process (GO:0009712)	11	1	1.442	-	1
response to disaccharide (GO:0034285)	11	1	1.442	-	1
positive regulation of protein secretion (GO:0050714)	11	3	1.442	+	1
cellular response to topologically incorrect protein (GO:0035967)	11	4	1.442	+	1
epithelial cell proliferation (GO:0050673)	11	1	1.442	-	1
determination of imaginal disc primordium (GO:0007445)	11	1	1.442	-	1
pyrimidine ribonucleoside metabolic process (GO:0046131)	11	3	1.442	+	1
response to unfolded protein (GO:0006986)	11	4	1.442	+	1
positive regulation of biosynthetic process of antibacterial peptides active against Gram-negative bacteria (GO:0006964)	11	5	1.442	+	1
negative regulation of protein serine/threonine kinase activity (GO:0071901)	11	4	1.442	+	1
positive regulation of neuron differentiation (GO:0045666)	11	4	1.442	+	1
negative regulation of neuron differentiation (GO:0045665)	11	1	1.442	-	1
germ-band extension (GO:0007377)	11	1	1.442	-	1
female germline ring canal formation (GO:0007301)	12	2	1.573	+	1
response to dsRNA (GO:0043331)	12	2	1.573	+	1
negative regulation of cell projection organization (GO:0031345)	12	4	1.573	+	1
regulation of vesicle fusion (GO:0031338)	12	2	1.573	+	1
JAK-STAT cascade (GO:0007259)	12	2	1.573	+	1
NADP metabolic process (GO:0006739)	12	6	1.573	+	1
establishment of mitotic spindle orientation (GO:0000132)	12	1	1.573	-	1
regulation of adult chitin-containing cuticle pigmentation (GO:0048082)	12	2	1.573	+	1
regulation of post-mating oviposition (GO:0048042)	12	2	1.573	+	1
glycerol ether metabolic process (GO:0006662)	12	1	1.573	-	1
mitotic metaphase plate congression (GO:0007080)	12	3	1.573	+	1
ATP-dependent chromatin remodeling (GO:0043044)	12	2	1.573	+	1
positive regulation of histone modification (GO:0031058)	12	2	1.573	+	1
dsRNA fragmentation (GO:0031050)	12	2	1.573	+	1
positive regulation of DNA-templated transcription, elongation (GO:0032786)	12	1	1.573	-	1
protein O-linked glycosylation (GO:0006493)	12	2	1.573	+	1
negative regulation of BMP signaling pathway (GO:0030514)	12	2	1.573	+	1
production of small RNA involved in gene silencing by RNA (GO:0070918)	12	2	1.573	+	1
dosage compensation by hyperactivation of X chromosome (GO:0009047)	12	1	1.573	-	1
cellular response to dsRNA (GO:0071359)	12	2	1.573	+	1
regulation of mitochondrion organization (GO:0010821)	12	2	1.573	+	1
DNA catabolic process (GO:0006308)	12	2	1.573	+	1
ectopic germ cell programmed cell death (GO:0035234)	12	5	1.573	+	1
positive regulation of wound healing (GO:0090303)	12	4	1.573	+	1
retinal cell programmed cell death (GO:0046666)	12	1	1.573	-	1
negative regulation of insulin receptor signaling pathway (GO:0046627)	12	1	1.573	-	1
response to cocaine (GO:0042220)	12	3	1.573	+	1
regulation of development, heterochronic (GO:0040034)	12	1	1.573	-	1
cell adhesion involved in heart morphogenesis (GO:0061343)	12	2	1.573	+	1
heparan sulfate proteoglycan metabolic process (GO:0030201)	12	3	1.573	+	1
regulation of epithelial cell migration (GO:0010632)	12	2	1.573	+	1
mitochondrial electron transport, cytochrome c to oxygen (GO:0006123)	12	1	1.573	-	1
liquid clearance, open tracheal system (GO:0035002)	12	1	1.573	-	1
negative regulation of cellular response to insulin stimulus (GO:1900077)	12	1	1.573	-	1
negative regulation of autophagy (GO:0010507)	12	3	1.573	+	1
ecdysone metabolic process (GO:0008205)	12	2	1.573	+	1
microtubule anchoring (GO:0034453)	12	2	1.573	+	1
positive regulation of mitotic cell cycle (GO:0045931)	12	3	1.573	+	1
positive regulation of lyase activity (GO:0051349)	12	1	1.573	-	1
photoreceptor cell fate specification (GO:0043704)	12	1	1.573	-	1
mechanosensory behavior (GO:0007638)	12	1	1.573	-	1
organic hydroxy compound catabolic process (GO:1901616)	12	2	1.573	+	1
positive regulation of smoothened signaling pathway (GO:0045880)	12	3	1.573	+	1
eye pigment granule organization (GO:0008057)	12	2	1.573	+	1
negative regulation of protein transport (GO:0051224)	12	1	1.573	-	1
regulation of mitotic cell cycle, embryonic (GO:0009794)	12	4	1.573	+	1
response to topologically incorrect protein (GO:0035966)	12	4	1.573	+	1
foregut morphogenesis (GO:0007440)	12	1	1.573	-	1
larval salivary gland morphogenesis (GO:0007436)	12	3	1.573	+	1
alcohol catabolic process (GO:0046164)	12	2	1.573	+	1
heparan sulfate proteoglycan biosynthetic process (GO:0015012)	12	3	1.573	+	1
renal system process (GO:0003014)	12	2	1.573	+	1
ether metabolic process (GO:0018904)	12	1	1.573	-	1
positive regulation of MAP kinase activity (GO:0043406)	12	1	1.573	-	1
dorsal closure, elongation of leading edge cells (GO:0007394)	12	3	1.573	+	1
response to ammonium ion (GO:0060359)	12	3	1.573	+	1
sperm axoneme assembly (GO:0007288)	13	2	1.704	+	1
carbohydrate derivative transport (GO:1901264)	13	2	1.704	+	1
cytochrome complex assembly (GO:0017004)	13	4	1.704	+	1
spermatocyte division (GO:0048137)	13	4	1.704	+	1
female germ-line stem cell asymmetric division (GO:0048132)	13	1	1.704	-	1
SMAD protein import into nucleus (GO:0007184)	13	5	1.704	+	1
compound eye pigmentation (GO:0048072)	13	1	1.704	-	1
metallo-sulfur cluster assembly (GO:0031163)	13	3	1.704	+	1
mitotic spindle assembly checkpoint (GO:0007094)	13	5	1.704	+	1
endoplasmic reticulum organization (GO:0007029)	13	4	1.704	+	1
intracellular protein transmembrane import (GO:0044743)	13	4	1.704	+	1
regulation of macroautophagy (GO:0016241)	13	3	1.704	+	1
establishment or maintenance of neuroblast polarity (GO:0045196)	13	3	1.704	+	1
intrinsic apoptotic signaling pathway in response to DNA damage (GO:0008630)	13	5	1.704	+	1
iron-sulfur cluster assembly (GO:0016226)	13	3	1.704	+	1
wing and notum subfield formation (GO:0035309)	13	2	1.704	+	1
glutamine family amino acid biosynthetic process (GO:0009084)	13	3	1.704	+	1
positive regulation of response to wounding (GO:1903036)	13	4	1.704	+	1
pseudouridine synthesis (GO:0001522)	13	7	1.704	+	1
cellular pigmentation (GO:0033059)	13	2	1.704	+	1
synaptic vesicle priming (GO:0016082)	13	3	1.704	+	1
pyrimidine nucleotide metabolic process (GO:0006220)	13	5	1.704	+	1
larval lymph gland hemopoiesis (GO:0035167)	13	1	1.704	-	1
post-embryonic hemopoiesis (GO:0035166)	13	1	1.704	-	1
lumen formation, open tracheal system (GO:0035149)	13	5	1.704	+	1
positive regulation of organ growth (GO:0046622)	13	3	1.704	+	1
cellular response to UV (GO:0034644)	13	1	1.704	-	1
spindle assembly checkpoint (GO:0071173)	13	5	1.704	+	1
regulation of proteasomal ubiquitin-dependent protein catabolic process (GO:0032434)	13	4	1.704	+	1
histone H4 acetylation (GO:0043967)	13	5	1.704	+	1
establishment of apical/basal cell polarity (GO:0035089)	13	2	1.704	+	1
mitochondrial electron transport, ubiquinol to cytochrome c (GO:0006122)	13	5	1.704	+	1
regulation of spindle organization (GO:0090224)	13	3	1.704	+	1
pigment granule organization (GO:0048753)	13	2	1.704	+	1
isoprenoid biosynthetic process (GO:0008299)	13	3	1.704	+	1
regulation of meiotic cell cycle (GO:0051445)	13	4	1.704	+	1
negative regulation of mitotic cell cycle (GO:0045930)	13	2	1.704	+	1
regulation of biosynthetic process of antibacterial peptides active against Gram-negative bacteria (GO:0002813)	13	5	1.704	+	1
peptidoglycan recognition protein signaling pathway (GO:0061057)	13	4	1.704	+	1
regulation of wound healing (GO:0061041)	13	4	1.704	+	1
pyridine-containing compound biosynthetic process (GO:0072525)	13	3	1.704	+	1
regulation of chitin-based cuticle tanning (GO:0007564)	13	2	1.704	+	1
regulation of defense response to virus (GO:0050688)	13	5	1.704	+	1
oviposition (GO:0018991)	13	1	1.704	-	1
regulation of feeding behavior (GO:0060259)	14	2	1.835	+	1
Notch receptor processing (GO:0007220)	14	3	1.835	+	1
regulation of cAMP biosynthetic process (GO:0030817)	14	1	1.835	-	1
regulation of cAMP metabolic process (GO:0030814)	14	1	1.835	-	1
negative regulation of cell cycle G1/S phase transition (GO:1902807)	14	5	1.835	+	1
G1/S transition of mitotic cell cycle (GO:0000082)	14	5	1.835	+	1
autophagic vacuole fusion (GO:0000046)	14	3	1.835	+	1
spindle assembly involved in female meiosis (GO:0007056)	14	4	1.835	+	1
cell cycle G1/S phase transition (GO:0044843)	14	5	1.835	+	1
regulation of cell cycle G2/M phase transition (GO:1902749)	14	2	1.835	+	1
response to endoplasmic reticulum stress (GO:0034976)	14	5	1.835	+	1
regulation of stem cell differentiation (GO:2000736)	14	2	1.835	+	1
intracellular receptor signaling pathway (GO:0030522)	14	2	1.835	+	1
regulation of translational initiation (GO:0006446)	14	5	1.835	+	1
asymmetric protein localization involved in cell fate determination (GO:0045167)	14	2	1.835	+	1
female gonad development (GO:0008585)	14	2	1.835	+	1
transcription from RNA polymerase III promoter (GO:0006383)	14	4	1.835	+	1
actin nucleation (GO:0045010)	14	3	1.835	+	1
tetrapyrrole metabolic process (GO:0033013)	14	7	1.835	+	1
protein autophosphorylation (GO:0046777)	14	3	1.835	+	1
centrosome localization (GO:0051642)	14	5	1.835	+	1
post-embryonic genitalia morphogenesis (GO:0035126)	14	2	1.835	+	1
imaginal disc-derived genitalia morphogenesis (GO:0048805)	14	2	1.835	+	1
imaginal disc-derived male genitalia morphogenesis (GO:0048803)	14	2	1.835	+	1
antennal morphogenesis (GO:0048800)	14	1	1.835	-	1
cellular carbohydrate biosynthetic process (GO:0034637)	14	1	1.835	-	1
mitotic spindle checkpoint (GO:0071174)	14	5	1.835	+	1
regulation of symbiosis, encompassing mutualism through parasitism (GO:0043903)	14	2	1.835	+	1
positive regulation of chromatin silencing (GO:0031937)	14	4	1.835	+	1
TOR signaling (GO:0031929)	14	3	1.835	+	1
somatic stem cell maintenance (GO:0035019)	14	1	1.835	-	1
development of primary female sexual characteristics (GO:0046545)	14	2	1.835	+	1
establishment of epithelial cell polarity (GO:0090162)	14	2	1.835	+	1
sensory perception of sweet taste (GO:0050916)	14	1	1.835	-	1
regulation of proteasomal protein catabolic process (GO:0061136)	14	5	1.835	+	1
determination of bilateral symmetry (GO:0009855)	14	5	1.835	+	1
negative regulation of G1/S transition of mitotic cell cycle (GO:2000134)	14	5	1.835	+	1
regulation of G2/M transition of mitotic cell cycle (GO:0010389)	14	2	1.835	+	1
membrane invagination (GO:0010324)	14	1	1.835	-	1
specification of symmetry (GO:0009799)	14	5	1.835	+	1
pyrimidine-containing compound biosynthetic process (GO:0072528)	14	6	1.835	+	1
response to carbohydrate (GO:0009743)	14	1	1.835	-	1
primary sex determination, soma (GO:0007539)	14	3	1.835	+	1
regulation of adenylate cyclase activity (GO:0045761)	14	1	1.835	-	1
positive regulation of protein catabolic process (GO:0045732)	14	4	1.835	+	1
spindle checkpoint (GO:0031577)	14	5	1.835	+	1
negative regulation of neuron apoptotic process (GO:0043524)	14	3	1.835	+	1
salivary gland boundary specification (GO:0007432)	14	1	1.835	-	1
ER-nucleus signaling pathway (GO:0006984)	14	5	1.835	+	1
positive regulation of protein serine/threonine kinase activity (GO:0071902)	14	1	1.835	-	1
muscle contraction (GO:0006936)	14	2	1.835	+	1
phagocytosis, engulfment (GO:0006911)	14	1	1.835	-	1
peptidoglycan metabolic process (GO:0000270)	15	1	1.966	-	1
Rho protein signal transduction (GO:0007266)	15	3	1.966	+	1
startle response (GO:0001964)	15	1	1.966	-	1
regulation of synaptic plasticity (GO:0048167)	15	1	1.966	-	1
regulation of nucleotide biosynthetic process (GO:0030808)	15	1	1.966	-	1
regulation of cyclic nucleotide biosynthetic process (GO:0030802)	15	1	1.966	-	1
nuclear-transcribed mRNA catabolic process, nonsense-mediated decay (GO:0000184)	15	2	1.966	+	1
ecdysteroid biosynthetic process (GO:0045456)	15	1	1.966	-	1
apoptotic cell clearance (GO:0043277)	15	2	1.966	+	1
regulation of cyclase activity (GO:0031279)	15	1	1.966	-	1
cell-matrix adhesion (GO:0007160)	15	1	1.966	-	1
regulation of cuticle pigmentation (GO:0048079)	15	4	1.966	+	1
regulation of cyclic nucleotide metabolic process (GO:0030799)	15	1	1.966	-	1
positive regulation of chromatin modification (GO:1903310)	15	3	1.966	+	1
oocyte localization involved in germarium-derived egg chamber formation (GO:0030720)	15	3	1.966	+	1
sulfur amino acid metabolic process (GO:0000096)	15	4	1.966	+	1
peptidoglycan catabolic process (GO:0009253)	15	1	1.966	-	1
negative regulation of stress-activated MAPK cascade (GO:0032873)	15	3	1.966	+	1
imaginal disc-derived leg joint morphogenesis (GO:0016348)	15	2	1.966	+	1
regulation of lamellipodium organization (GO:1902743)	15	6	1.966	+	1
positive regulation of chromosome organization (GO:2001252)	15	3	1.966	+	1
regulation of neurotransmitter secretion (GO:0046928)	15	1	1.966	-	1
pteridine-containing compound metabolic process (GO:0042558)	15	4	1.966	+	1
male anatomical structure morphogenesis (GO:0090598)	15	2	1.966	+	1
polysaccharide metabolic process (GO:0005976)	15	1	1.966	-	1
aspartate family amino acid metabolic process (GO:0009066)	15	7	1.966	+	1
regulation of response to wounding (GO:1903034)	15	4	1.966	+	1
cellular response to ecdysone (GO:0071390)	15	3	1.966	+	1
regulation of purine nucleotide biosynthetic process (GO:1900371)	15	1	1.966	-	1
regulation of tube diameter (GO:0035296)	15	3	1.966	+	1
synaptic vesicle docking involved in exocytosis (GO:0016081)	15	4	1.966	+	1
oocyte nucleus localization involved in oocyte dorsal/ventral axis specification (GO:0051663)	15	2	1.966	+	1
mitochondrion localization (GO:0051646)	15	1	1.966	-	1
defense response to virus (GO:0051607)	15	3	1.966	+	1
brain morphogenesis (GO:0048854)	15	1	1.966	-	1
male genitalia morphogenesis (GO:0048808)	15	2	1.966	+	1
cellular response to reactive oxygen species (GO:0034614)	15	7	1.966	+	1
regulation of neurotransmitter transport (GO:0051588)	15	1	1.966	-	1
purine nucleobase metabolic process (GO:0006144)	15	3	1.966	+	1
pupariation (GO:0035073)	15	2	1.966	+	1
positive regulation of Rho protein signal transduction (GO:0035025)	15	1	1.966	-	1
regulation of lamellipodium assembly (GO:0010591)	15	6	1.966	+	1
positive regulation of filopodium assembly (GO:0051491)	15	5	1.966	+	1
glycosaminoglycan catabolic process (GO:0006027)	15	1	1.966	-	1
cellular polysaccharide metabolic process (GO:0044264)	15	1	1.966	-	1
negative chemotaxis (GO:0050919)	15	1	1.966	-	1
snRNA 3'-end processing (GO:0034472)	15	7	1.966	+	1
cellular response to ketone (GO:1901655)	15	3	1.966	+	1
positive regulation of behavior (GO:0048520)	15	2	1.966	+	1
positive regulation of JNK cascade (GO:0046330)	15	2	1.966	+	1
negative regulation of JNK cascade (GO:0046329)	15	3	1.966	+	1
adherens junction assembly (GO:0034333)	15	1	1.966	-	1
regulation of response to nutrient levels (GO:0032107)	15	3	1.966	+	1
regulation of response to extracellular stimulus (GO:0032104)	15	3	1.966	+	1
germline stem cell asymmetric division (GO:0098728)	15	3	1.966	+	1
amide biosynthetic process (GO:0043604)	15	2	1.966	+	1
eclosion (GO:0007562)	15	2	1.966	+	1
negative regulation of stress-activated protein kinase signaling cascade (GO:0070303)	15	3	1.966	+	1
mesoderm migration involved in gastrulation (GO:0007509)	15	1	1.966	-	1
regulation of protein secretion (GO:0050708)	15	3	1.966	+	1
regulation of transcription elongation from RNA polymerase II promoter (GO:0034243)	15	2	1.966	+	1
regulation of ARF protein signal transduction (GO:0032012)	15	2	1.966	+	1
R8 cell fate commitment (GO:0007460)	15	1	1.966	-	1
primary branching, open tracheal system (GO:0007428)	15	2	1.966	+	1
axonal fasciculation (GO:0007413)	15	3	1.966	+	1
axon target recognition (GO:0007412)	15	1	1.966	-	1
cellular response to sterol (GO:0036315)	15	3	1.966	+	1
activation of cysteine-type endopeptidase activity involved in apoptotic process (GO:0006919)	15	5	1.966	+	1
negative regulation of DNA metabolic process (GO:0051053)	15	1	1.966	-	1
dicarboxylic acid transport (GO:0006835)	16	1	2.097	-	1
fusome organization (GO:0045478)	16	4	2.097	+	1
nurse cell apoptotic process (GO:0045476)	16	4	2.097	+	1
protein complex disassembly (GO:0043241)	16	2	2.097	-	1
germarium-derived female germ-line cyst formation (GO:0030727)	16	2	2.097	-	1
germline ring canal formation (GO:0030725)	16	3	2.097	+	1
SRP-dependent cotranslational protein targeting to membrane (GO:0006614)	16	4	2.097	+	1
cell cycle G2/M phase transition (GO:0044839)	16	6	2.097	+	1
positive regulation of stress-activated MAPK cascade (GO:0032874)	16	3	2.097	+	1
cellular transition metal ion homeostasis (GO:0046916)	16	2	2.097	-	1
regulation of dephosphorylation (GO:0035303)	16	2	2.097	-	1
regulation of Toll signaling pathway (GO:0008592)	16	1	2.097	-	1
mRNA cleavage (GO:0006379)	16	8	2.097	+	1
microtubule polymerization (GO:0046785)	16	2	2.097	-	1
endosome transport via multivesicular body sorting pathway (GO:0032509)	16	7	2.097	+	1
regulation of gene silencing by RNA (GO:0060966)	16	3	2.097	+	1
genitalia morphogenesis (GO:0035112)	16	2	2.097	-	1
lipid storage (GO:0019915)	16	2	2.097	-	1
regulation of insulin receptor signaling pathway (GO:0046626)	16	1	2.097	-	1
establishment or maintenance of monopolar cell polarity (GO:0061339)	16	3	2.097	+	1
locomotion involved in locomotory behavior (GO:0031987)	16	1	2.097	-	1
positive regulation of NFAT protein import into nucleus (GO:0051533)	16	4	2.097	+	1
regulation of NFAT protein import into nucleus (GO:0051532)	16	4	2.097	+	1
axoneme assembly (GO:0035082)	16	2	2.097	-	1
establishment of glial blood-brain barrier (GO:0060857)	16	2	2.097	-	1
activation of cysteine-type endopeptidase activity (GO:0097202)	16	5	2.097	+	1
proteoglycan biosynthetic process (GO:0030166)	16	3	2.097	+	1
regulation of cellular response to insulin stimulus (GO:1900076)	16	1	2.097	-	1
aminoglycan biosynthetic process (GO:0006023)	16	3	2.097	+	1
regulation of muscle organ development (GO:0048634)	16	2	2.097	-	1
epithelial fluid transport (GO:0042045)	16	1	2.097	-	1
establishment of monopolar cell polarity (GO:0061162)	16	3	2.097	+	1
regulation of lyase activity (GO:0051339)	16	1	2.097	-	1
metaphase plate congression (GO:0051310)	16	7	2.097	+	1
negative regulation of metaphase/anaphase transition of cell cycle (GO:1902100)	16	5	2.097	+	1
centrosome separation (GO:0051299)	16	4	2.097	+	1
establishment of spindle orientation (GO:0051294)	16	2	2.097	-	1
negative regulation of mitotic metaphase/anaphase transition (GO:0045841)	16	5	2.097	+	1
reactive oxygen species metabolic process (GO:0072593)	16	6	2.097	+	1
cellular protein complex disassembly (GO:0043624)	16	2	2.097	-	1
response to nutrient (GO:0007584)	16	2	2.097	-	1
positive regulation of stress-activated protein kinase signaling cascade (GO:0070304)	16	3	2.097	+	1
regulation of TOR signaling (GO:0032006)	16	3	2.097	+	1
positive regulation of translation (GO:0045727)	16	1	2.097	-	1
entrainment of circadian clock (GO:0009649)	16	1	2.097	-	1
R3/R4 cell fate commitment (GO:0007464)	16	1	2.097	-	1
regulation of binding (GO:0051098)	16	4	2.097	+	1
regulation of R7 cell differentiation (GO:0045676)	16	4	2.097	+	1
cytoplasmic transport, nurse cell to oocyte (GO:0007303)	17	4	2.229	+	1
negative regulation of cellular catabolic process (GO:0031330)	17	4	2.229	+	1
negative regulation of neuron death (GO:1901215)	17	3	2.229	+	1
positive regulation of actin filament polymerization (GO:0030838)	17	3	2.229	+	1
one-carbon metabolic process (GO:0006730)	17	3	2.229	+	1
positive regulation of cysteine-type endopeptidase activity involved in apoptotic process (GO:0043280)	17	5	2.229	+	1
regulation of cellular protein catabolic process (GO:1903362)	17	5	2.229	+	1
macromolecular complex disassembly (GO:0032984)	17	3	2.229	+	1
R3/R4 cell differentiation (GO:0048056)	17	1	2.229	-	1
oligosaccharide biosynthetic process (GO:0009312)	17	1	2.229	-	1
ovarian follicle cell stalk formation (GO:0030713)	17	5	2.229	+	1
mitotic anaphase (GO:0000090)	17	8	2.229	+	1
cotranslational protein targeting to membrane (GO:0006613)	17	4	2.229	+	1
regulation of cyclin-dependent protein serine/threonine kinase activity (GO:0000079)	17	8	2.229	+	1
lysosomal transport (GO:0007041)	17	4	2.229	+	1
actomyosin contractile ring organization (GO:0044837)	17	2	2.229	-	1
cytoskeletal anchoring at plasma membrane (GO:0007016)	17	1	2.229	-	1
apoptotic process involved in development (GO:1902742)	17	4	2.229	+	1
intercellular bridge organization (GO:0043063)	17	3	2.229	+	1
organic hydroxy compound transport (GO:0015850)	17	1	2.229	-	1
protein N-linked glycosylation (GO:0006487)	17	8	2.229	+	1
negative regulation of protein kinase activity (GO:0006469)	17	5	2.229	+	1
organophosphate ester transport (GO:0015748)	17	2	2.229	-	1
serine family amino acid metabolic process (GO:0009069)	17	3	2.229	+	1
phosphatidylinositol phosphorylation (GO:0046854)	17	4	2.229	+	1
response to drug (GO:0042493)	17	1	2.229	-	1
regulation of proteolysis involved in cellular protein catabolic process (GO:1903050)	17	5	2.229	+	1
chromosome localization (GO:0050000)	17	8	2.229	+	1
photoreceptor cell morphogenesis (GO:0008594)	17	1	2.229	-	1
snRNA processing (GO:0016180)	17	8	2.229	+	1
sterol metabolic process (GO:0016125)	17	4	2.229	+	1
protein targeting to ER (GO:0045047)	17	5	2.229	+	1
prepupal development (GO:0035210)	17	3	2.229	+	1
snRNA metabolic process (GO:0016073)	17	8	2.229	+	1
regulation of DNA replication (GO:0006275)	17	2	2.229	-	1
syncytial blastoderm mitotic cell cycle (GO:0035186)	17	1	2.229	-	1
actomyosin contractile ring assembly (GO:0000915)	17	2	2.229	-	1
positive regulation of mitotic cell cycle phase transition (GO:1901992)	17	4	2.229	+	1
positive regulation of cell cycle phase transition (GO:1901989)	17	4	2.229	+	1
negative regulation of gene silencing (GO:0060969)	17	3	2.229	+	1
chitin-based embryonic cuticle biosynthetic process (GO:0008362)	17	4	2.229	+	1
histone H3-K4 methylation (GO:0051568)	17	3	2.229	+	1
cell-type specific apoptotic process (GO:0097285)	17	4	2.229	+	1
organelle membrane fusion (GO:0090174)	17	4	2.229	+	1
proteoglycan metabolic process (GO:0006029)	17	3	2.229	+	1
nicotinamide nucleotide metabolic process (GO:0046496)	17	7	2.229	+	1
maintenance of cell polarity (GO:0030011)	17	4	2.229	+	1
chromosome separation (GO:0051304)	17	6	2.229	+	1
establishment of chromosome localization (GO:0051303)	17	8	2.229	+	1
[truncated: 1,466 more rows]

## Sheet: GO_cluster3
Term	Background frequency	Sample frequency	Expected	+/-	P-value
cellular process (GO:0009987)	6003	1192	858.3	+	4.152e-49
biological regulation (GO:0065007)	3233	760	462.3	+	7.297e-48
regulation of biological process (GO:0050789)	2975	707	425.4	+	6.59e-45
single-organism cellular process (GO:0044763)	4797	986	685.9	+	4.298e-41
regulation of cellular process (GO:0050794)	2753	655	393.6	+	1.361e-40
cellular metabolic process (GO:0044237)	3260	709	466.1	+	6.648e-32
single-organism process (GO:0044699)	6254	1164	894.2	+	1.146e-31
single-organism developmental process (GO:0044767)	3135	687	448.3	+	1.615e-31
developmental process (GO:0032502)	3158	690	451.5	+	2.593e-31
cellular macromolecule metabolic process (GO:0044260)	2294	539	328	+	5.978e-30
anatomical structure development (GO:0048856)	2849	633	407.4	+	8.332e-30
cellular developmental process (GO:0048869)	2174	515	310.8	+	4.26e-29
multicellular organismal development (GO:0007275)	2686	601	384.1	+	1.365e-28
cellular component organization (GO:0016043)	2221	521	317.6	+	1.737e-28
cell differentiation (GO:0030154)	2114	501	302.3	+	3.95e-28
system development (GO:0048731)	2139	504	305.8	+	9.487e-28
regulation of cellular component organization (GO:0051128)	538	193	76.92	+	2.62e-27
cellular component organization or biogenesis (GO:0071840)	2278	526	325.7	+	3.65e-27
anatomical structure morphogenesis (GO:0009653)	1622	400	231.9	+	2.006e-24
regulation of metabolic process (GO:0019222)	1492	376	213.3	+	2.364e-24
cell development (GO:0048468)	1326	344	189.6	+	5.239e-24
cellular localization (GO:0051641)	731	225	104.5	+	2.371e-23
nervous system development (GO:0007399)	1490	367	213	+	6.791e-22
single-multicellular organism process (GO:0044707)	3205	657	458.3	+	1.568e-21
regulation of response to stimulus (GO:0048583)	820	237	117.2	+	3.652e-21
regulation of signal transduction (GO:0009966)	606	190	86.65	+	3.765e-20
regulation of cellular metabolic process (GO:0031323)	1324	330	189.3	+	4.735e-20
protein modification process (GO:0036211)	814	232	116.4	+	6.771e-20
cellular protein modification process (GO:0006464)	814	232	116.4	+	6.771e-20
negative regulation of biological process (GO:0048519)	1006	269	143.8	+	1.073e-19
regulation of cell communication (GO:0010646)	684	205	97.8	+	1.097e-19
regulation of signaling (GO:0023051)	676	202	96.66	+	3.254e-19
neurogenesis (GO:0022008)	1340	329	191.6	+	5.78e-19
single-organism organelle organization (GO:1902589)	936	253	133.8	+	6.2e-19
organelle organization (GO:0006996)	1436	346	205.3	+	7.594e-19
localization (GO:0051179)	1859	420	265.8	+	1.215e-18
macromolecule modification (GO:0043412)	859	237	122.8	+	1.251e-18
macromolecule localization (GO:0033036)	574	178	82.07	+	3.094e-18
positive regulation of biological process (GO:0048518)	933	250	133.4	+	3.419e-18
generation of neurons (GO:0048699)	828	227	118.4	+	2.128e-17
multicellular organismal process (GO:0032501)	3631	702	519.2	+	7.144e-17
establishment of localization in cell (GO:0051649)	608	181	86.93	+	8.582e-17
regulation of primary metabolic process (GO:0080090)	1248	303	178.4	+	1.71e-16
neuron differentiation (GO:0030182)	733	204	104.8	+	4.708e-16
primary metabolic process (GO:0044238)	3665	703	524	+	4.718e-16
negative regulation of cellular process (GO:0048523)	874	231	125	+	6.685e-16
organ development (GO:0048513)	1216	294	173.9	+	1.163e-15
response to stimulus (GO:0050896)	2382	495	340.6	+	1.3e-15
positive regulation of cellular process (GO:0048522)	822	219	117.5	+	2.589e-15
macromolecule metabolic process (GO:0043170)	2932	582	419.2	+	4.269e-15
organic substance metabolic process (GO:0071704)	3932	739	562.2	+	4.662e-15
cellular process involved in reproduction in multicellular organism (GO:0022412)	712	195	101.8	+	1.544e-14
regulation of biological quality (GO:0065008)	903	231	129.1	+	2.616e-14
regulation of macromolecule metabolic process (GO:0060255)	1255	295	179.4	+	4.042e-14
nucleic acid metabolic process (GO:0090304)	996	247	142.4	+	6.363e-14
gamete generation (GO:0007276)	773	203	110.5	+	2.193e-13
protein localization (GO:0008104)	444	137	63.48	+	2.265e-13
germ cell development (GO:0007281)	646	178	92.37	+	2.62e-13
regulation of intracellular signal transduction (GO:1902531)	300	105	42.89	+	3.513e-13
cell communication (GO:0007154)	1375	311	196.6	+	7.587e-13
metabolic process (GO:0008152)	4503	813	643.9	+	8.033e-13
vesicle-mediated transport (GO:0016192)	492	145	70.35	+	1.121e-12
regulation of nitrogen compound metabolic process (GO:0051171)	1006	244	143.8	+	1.194e-12
regulation of developmental process (GO:0050793)	567	160	81.07	+	1.343e-12
cellular macromolecule localization (GO:0070727)	343	113	49.04	+	1.526e-12
oogenesis (GO:0048477)	553	157	79.07	+	1.538e-12
neuron development (GO:0048666)	634	173	90.65	+	1.681e-12
female gamete generation (GO:0007292)	560	158	80.07	+	2.075e-12
single organism reproductive process (GO:0044702)	835	211	119.4	+	2.55e-12
developmental process involved in reproduction (GO:0003006)	753	195	107.7	+	3.426e-12
establishment of localization (GO:0051234)	1547	338	221.2	+	3.451e-12
cellular component morphogenesis (GO:0032989)	765	197	109.4	+	4.127e-12
single-organism metabolic process (GO:0044710)	1850	389	264.5	+	4.583e-12
cell cycle (GO:0007049)	700	184	100.1	+	5.932e-12
organ morphogenesis (GO:0009887)	692	182	98.94	+	8.041e-12
cellular response to stimulus (GO:0051716)	1293	292	184.9	+	8.559e-12
regulation of nucleobase-containing compound metabolic process (GO:0019219)	970	234	138.7	+	8.846e-12
multicellular organismal reproductive process (GO:0048609)	874	216	125	+	1.051e-11
cellular protein metabolic process (GO:0044267)	1368	304	195.6	+	1.549e-11
cell division (GO:0051301)	466	136	66.63	+	1.855e-11
cellular aromatic compound metabolic process (GO:0006725)	1415	311	202.3	+	2.805e-11
single organism signaling (GO:0044700)	1319	294	188.6	+	3.242e-11
signaling (GO:0023052)	1319	294	188.6	+	3.242e-11
cellular response to stress (GO:0033554)	437	129	62.48	+	4.097e-11
sexual reproduction (GO:0019953)	892	217	127.5	+	4.239e-11
RNA metabolic process (GO:0016070)	625	166	89.36	+	6.109e-11
cytoskeleton organization (GO:0007010)	605	162	86.5	+	6.569e-11
multi-organism reproductive process (GO:0044703)	902	218	129	+	6.94e-11
regulation of cellular component biogenesis (GO:0044087)	196	75	28.02	+	9.401e-11
nucleobase-containing compound metabolic process (GO:0006139)	1287	286	184	+	1.107e-10
cellular macromolecule catabolic process (GO:0044265)	262	90	37.46	+	1.317e-10
regulation of Ras protein signal transduction (GO:0046578)	165	67	23.59	+	1.458e-10
regulation of small GTPase mediated signal transduction (GO:0051056)	166	67	23.74	+	1.906e-10
cell morphogenesis (GO:0000902)	655	170	93.65	+	1.984e-10
multi-organism process (GO:0051704)	1175	265	168	+	2.197e-10
regulation of gene expression (GO:0010468)	1075	247	153.7	+	2.516e-10
organic cyclic compound metabolic process (GO:1901360)	1484	318	212.2	+	3.039e-10
transport (GO:0006810)	1491	319	213.2	+	3.336e-10
heterocycle metabolic process (GO:0046483)	1381	300	197.5	+	3.512e-10
regulation of phosphate metabolic process (GO:0019220)	272	91	38.89	+	4.039e-10
regulation of phosphorus metabolic process (GO:0051174)	272	91	38.89	+	4.039e-10
cellular protein localization (GO:0034613)	283	93	40.46	+	5.917e-10
organic substance transport (GO:0071702)	476	133	68.06	+	7.6e-10
cell cycle process (GO:0022402)	619	161	88.51	+	7.694e-10
reproductive process (GO:0022414)	965	225	138	+	8.627e-10
response to stress (GO:0006950)	942	220	134.7	+	1.376e-09
cellular nitrogen compound metabolic process (GO:0034641)	1410	302	201.6	+	1.466e-09
regulation of organelle organization (GO:0033043)	218	77	31.17	+	2.113e-09
regulation of cellular catabolic process (GO:0031329)	151	61	21.59	+	2.199e-09
regulation of nucleotide catabolic process (GO:0030811)	73	40	10.44	+	2.261e-09
regulation of nucleoside metabolic process (GO:0009118)	73	40	10.44	+	2.261e-09
regulation of purine nucleotide catabolic process (GO:0033121)	73	40	10.44	+	2.261e-09
cellular catabolic process (GO:0044248)	504	137	72.06	+	2.28e-09
endocytosis (GO:0006897)	314	98	44.9	+	2.54e-09
cell projection organization (GO:0030030)	629	161	89.94	+	2.616e-09
regulation of catabolic process (GO:0009894)	164	64	23.45	+	2.711e-09
regulation of localization (GO:0032879)	261	86	37.32	+	3.883e-09
regulation of GTPase activity (GO:0043087)	71	39	10.15	+	3.941e-09
regulation of GTP catabolic process (GO:0033124)	71	39	10.15	+	3.941e-09
locomotion (GO:0040011)	540	143	77.21	+	4.627e-09
phosphorus metabolic process (GO:0006793)	749	182	107.1	+	6.53e-09
cellular component movement (GO:0006928)	575	149	82.22	+	7.596e-09
neuron projection development (GO:0031175)	525	139	75.07	+	9.49e-09
macromolecule catabolic process (GO:0009057)	310	95	44.32	+	1.456e-08
establishment or maintenance of cell polarity (GO:0007163)	189	68	27.02	+	1.891e-08
regulation of multicellular organismal development (GO:2000026)	394	112	56.34	+	1.94e-08
phosphate-containing compound metabolic process (GO:0006796)	738	178	105.5	+	2.036e-08
regulation of Ras GTPase activity (GO:0032318)	65	36	9.294	+	2.084e-08
DNA repair (GO:0006281)	117	50	16.73	+	3.142e-08
reproduction (GO:0000003)	1198	259	171.3	+	3.167e-08
cell-cell signaling (GO:0007267)	510	134	72.92	+	3.75e-08
intracellular transport (GO:0046907)	451	122	64.49	+	5.15e-08
mitotic cell cycle (GO:0000278)	508	133	72.64	+	5.59e-08
regulation of anatomical structure morphogenesis (GO:0022603)	248	80	35.46	+	5.89e-08
regulation of cell morphogenesis (GO:0022604)	160	60	22.88	+	6.029e-08
neuron projection morphogenesis (GO:0048812)	514	134	73.49	+	6.196e-08
single-organism transport (GO:0044765)	1313	277	187.7	+	7.073e-08
nuclear division (GO:0000280)	315	94	45.04	+	7.349e-08
organelle fission (GO:0048285)	320	95	45.75	+	7.586e-08
protein modification by small protein conjugation or removal (GO:0070647)	209	71	29.88	+	8.148e-08
cell part morphogenesis (GO:0032990)	570	144	81.5	+	9.662e-08
posttranscriptional regulation of gene expression (GO:0010608)	167	61	23.88	+	1.15e-07
regulation of growth (GO:0040008)	229	75	32.74	+	1.21e-07
organelle localization (GO:0051640)	186	65	26.59	+	1.679e-07
cell morphogenesis involved in differentiation (GO:0000904)	460	122	65.77	+	1.682e-07
regulation of multicellular organismal process (GO:0051239)	545	138	77.93	+	2.096e-07
regulation of nucleotide metabolic process (GO:0006140)	89	41	12.73	+	2.147e-07
synaptic transmission (GO:0007268)	280	85	40.04	+	2.709e-07
cell morphogenesis involved in neuron differentiation (GO:0048667)	424	114	60.62	+	3.177e-07
cell projection morphogenesis (GO:0048858)	565	141	80.79	+	3.374e-07
protein transport (GO:0015031)	291	87	41.61	+	3.448e-07
actin filament-based process (GO:0030029)	221	72	31.6	+	3.54e-07
regulation of purine nucleotide metabolic process (GO:1900542)	87	40	12.44	+	3.749e-07
epithelium development (GO:0060429)	525	133	75.07	+	4.394e-07
positive regulation of cellular component organization (GO:0051130)	132	51	18.87	+	6.082e-07
establishment of protein localization (GO:0045184)	300	88	42.89	+	6.723e-07
establishment of organelle localization (GO:0051656)	163	58	23.31	+	8.418e-07
positive regulation of metabolic process (GO:0009893)	468	121	66.92	+	8.77e-07
catabolic process (GO:0009056)	632	151	90.37	+	1.41e-06
regulation of gene expression, epigenetic (GO:0040029)	119	47	17.01	+	1.442e-06
protein phosphorylation (GO:0006468)	248	76	35.46	+	1.608e-06
regulation of hydrolase activity (GO:0051336)	141	52	20.16	+	1.942e-06
biological_process (GO:0008150)	10417	1597	1489	+	2.083e-06
positive regulation of cellular metabolic process (GO:0031325)	455	117	65.06	+	2.267e-06
chromosome segregation (GO:0007059)	142	52	20.3	+	2.446e-06
nitrogen compound metabolic process (GO:0006807)	1688	331	241.4	+	2.473e-06
regulation of cell cycle (GO:0051726)	319	90	45.61	+	2.703e-06
meiotic cell cycle (GO:0051321)	173	59	24.74	+	2.766e-06
actin cytoskeleton organization (GO:0030036)	205	66	29.31	+	3.002e-06
regulation of molecular function (GO:0065009)	291	84	41.61	+	3.364e-06
post-embryonic development (GO:0009791)	658	154	94.08	+	3.69e-06
sensory organ development (GO:0007423)	439	113	62.77	+	4.067e-06
RNA localization (GO:0006403)	128	48	18.3	+	4.829e-06
tissue development (GO:0009888)	733	167	104.8	+	4.884e-06
instar larval or pupal development (GO:0002165)	625	147	89.36	+	6.294e-06
mitotic cell cycle process (GO:1903047)	454	115	64.91	+	6.972e-06
regulation of cell shape (GO:0008360)	113	44	16.16	+	7.166e-06
nucleobase-containing compound transport (GO:0015931)	78	35	11.15	+	8.343e-06
RNA catabolic process (GO:0006401)	40	24	5.719	+	9.991e-06
organic substance catabolic process (GO:1901575)	554	133	79.21	+	1.074e-05
regulation of cell cycle process (GO:0010564)	185	60	26.45	+	1.202e-05
embryo development (GO:0009790)	512	125	73.21	+	1.208e-05
imaginal disc development (GO:0007444)	621	145	88.79	+	1.248e-05
eye development (GO:0001654)	325	89	46.47	+	1.275e-05
cellular response to DNA damage stimulus (GO:0006974)	261	76	37.32	+	1.321e-05
intracellular protein transport (GO:0006886)	209	65	29.88	+	1.416e-05
regulation of catalytic activity (GO:0050790)	243	72	34.74	+	1.623e-05
multicellular organism reproduction (GO:0032504)	1075	224	153.7	+	1.655e-05
meiotic cell cycle process (GO:1903046)	138	49	19.73	+	1.791e-05
chromatin modification (GO:0016568)	135	48	19.3	+	2.395e-05
regulation of synapse structure and activity (GO:0050803)	118	44	16.87	+	2.437e-05
double-strand break repair (GO:0006302)	36	22	5.147	+	2.96e-05
metamorphosis (GO:0007552)	554	131	79.21	+	3.247e-05
axon development (GO:0061564)	292	81	41.75	+	3.392e-05
secretion by cell (GO:0032940)	141	49	20.16	+	3.412e-05
negative regulation of metabolic process (GO:0009892)	480	117	68.63	+	3.896e-05
chromosome organization (GO:0051276)	448	111	64.06	+	3.91e-05
meiotic nuclear division (GO:0007126)	155	52	22.16	+	3.949e-05
negative regulation of macromolecule metabolic process (GO:0010605)	443	110	63.34	+	4.048e-05
post-embryonic morphogenesis (GO:0009886)	540	128	77.21	+	4.113e-05
epithelial cell differentiation (GO:0030855)	339	90	48.47	+	4.18e-05
protein ubiquitination (GO:0016567)	151	51	21.59	+	4.334e-05
instar larval or pupal morphogenesis (GO:0048707)	530	126	75.78	+	4.498e-05
phosphorylation (GO:0016310)	376	97	53.76	+	4.696e-05
secretion (GO:0046903)	147	50	21.02	+	4.745e-05
axonogenesis (GO:0007409)	285	79	40.75	+	5.151e-05
single-organism intracellular transport (GO:1902582)	377	97	53.9	+	5.3e-05
compound eye development (GO:0048749)	311	84	44.47	+	5.811e-05
response to external stimulus (GO:0009605)	751	165	107.4	+	6.337e-05
nitrogen compound transport (GO:0071705)	144	49	20.59	+	6.361e-05
positive regulation of cell communication (GO:0010647)	247	71	35.32	+	6.403e-05
regulation of synapse organization (GO:0050807)	93	37	13.3	+	6.489e-05
eye morphogenesis (GO:0048592)	252	72	36.03	+	6.507e-05
sensory perception of chemical stimulus (GO:0007606)	265	10	37.89	-	6.813e-05
regulation of nervous system development (GO:0051960)	214	64	30.6	+	7.281e-05
positive regulation of molecular function (GO:0044093)	110	41	15.73	+	7.291e-05
regulation of Rab protein signal transduction (GO:0032483)	38	22	5.433	+	7.439e-05
positive regulation of response to stimulus (GO:0048584)	308	83	44.04	+	7.647e-05
gene silencing (GO:0016458)	98	38	14.01	+	8.213e-05
regulation of RNA metabolic process (GO:0051252)	864	184	123.5	+	8.709e-05
positive regulation of macromolecule metabolic process (GO:0010604)	366	94	52.33	+	9.228e-05
compound eye morphogenesis (GO:0001745)	240	69	34.32	+	9.721e-05
positive regulation of signaling (GO:0023056)	240	69	34.32	+	9.721e-05
regulation of mitotic cell cycle (GO:0007346)	207	62	29.6	+	0.0001102
positive regulation of protein metabolic process (GO:0051247)	87	35	12.44	+	0.0001125
regulation of biosynthetic process (GO:0009889)	927	194	132.5	+	0.0001253
protein modification by small protein conjugation (GO:0032446)	161	52	23.02	+	0.0001256
modification-dependent macromolecule catabolic process (GO:0043632)	208	62	29.74	+	0.0001296
establishment of RNA localization (GO:0051236)	68	30	9.723	+	0.0001343
regulation of transport (GO:0051049)	166	53	23.74	+	0.0001355
anatomical structure formation involved in morphogenesis (GO:0048646)	526	123	75.21	+	0.0001537
oocyte differentiation (GO:0009994)	144	48	20.59	+	0.0001557
mRNA metabolic process (GO:0016071)	273	75	39.03	+	0.0001568
regulation of protein metabolic process (GO:0051246)	314	83	44.9	+	0.000167
regulation of cellular biosynthetic process (GO:0031326)	926	193	132.4	+	0.0001783
negative regulation of response to stimulus (GO:0048585)	269	74	38.46	+	0.0001802
neuron projection guidance (GO:0097485)	246	69	35.17	+	0.0002353
modification-dependent protein catabolic process (GO:0019941)	207	61	29.6	+	0.0002379
microtubule cytoskeleton organization (GO:0000226)	396	98	56.62	+	0.0002595
negative regulation of signal transduction (GO:0009968)	227	65	32.46	+	0.0002603
regulation of cell differentiation (GO:0045595)	282	76	40.32	+	0.0002682
negative regulation of cell communication (GO:0010648)	242	68	34.6	+	0.0002697
photoreceptor cell differentiation (GO:0046530)	161	51	23.02	+	0.0002919
developmental maturation (GO:0021700)	161	51	23.02	+	0.0002919
axon guidance (GO:0007411)	238	67	34.03	+	0.0003091
RNA transport (GO:0050658)	67	29	9.58	+	0.0003162
nucleic acid transport (GO:0050657)	67	29	9.58	+	0.0003162
ubiquitin-dependent protein catabolic process (GO:0006511)	204	60	29.17	+	0.0003169
taxis (GO:0042330)	314	82	44.9	+	0.000319
proteolysis involved in cellular protein catabolic process (GO:0051603)	209	61	29.88	+	0.0003255
cellular protein catabolic process (GO:0044257)	209	61	29.88	+	0.0003255
negative regulation of signaling (GO:0023057)	239	67	34.17	+	0.0003571
morphogenesis of an epithelium (GO:0002009)	285	76	40.75	+	0.0003978
endomembrane system organization (GO:0010256)	109	39	15.59	+	0.000409
gene silencing by miRNA (GO:0035195)	23	16	3.289	+	0.0004197
post-embryonic organ morphogenesis (GO:0048563)	445	106	63.63	+	0.0004928
imaginal disc morphogenesis (GO:0007560)	445	106	63.63	+	0.0004928
protein catabolic process (GO:0030163)	222	63	31.74	+	0.0005316
post-embryonic organ development (GO:0048569)	473	111	67.63	+	0.000532
positive regulation of signal transduction (GO:0009967)	232	65	33.17	+	0.0005419
posttranscriptional gene silencing (GO:0016441)	43	22	6.148	+	0.0005781
posttranscriptional gene silencing by RNA (GO:0035194)	43	22	6.148	+	0.0005781
wing disc development (GO:0035220)	458	108	65.49	+	0.0006097
regulation of cellular localization (GO:0060341)	133	44	19.02	+	0.0006127
chemotaxis (GO:0006935)	258	70	36.89	+	0.0006239
regulation of Rab GTPase activity (GO:0032313)	30	18	4.289	+	0.000673
synapse organization (GO:0050808)	107	38	15.3	+	0.0006825
gene silencing by RNA (GO:0031047)	47	23	6.72	+	0.0006838
signal transduction (GO:0007165)	916	188	131	+	0.0007011
eye photoreceptor cell differentiation (GO:0001754)	143	46	20.45	+	0.0007289
regulation of synapse assembly (GO:0051963)	82	32	11.72	+	0.0007336
positive regulation of cellular protein metabolic process (GO:0032270)	82	32	11.72	+	0.0007336
RNA processing (GO:0006396)	363	90	51.9	+	0.0007409
regulation of mitotic cell cycle phase transition (GO:1901990)	134	44	19.16	+	0.0007436
regulation of cell cycle phase transition (GO:1901987)	134	44	19.16	+	0.0007436
cellular response to organic substance (GO:0071310)	139	45	19.87	+	0.0008109
regulation of macromolecule biosynthetic process (GO:0010556)	877	181	125.4	+	0.0008177
regulation of cellular macromolecule biosynthetic process (GO:2000112)	877	181	125.4	+	0.0008177
intracellular signal transduction (GO:0035556)	301	78	43.04	+	0.0008202
regulation of cellular protein metabolic process (GO:0032268)	255	69	36.46	+	0.0008212
mRNA catabolic process (GO:0006402)	34	19	4.861	+	0.0009425
regulation of embryonic development (GO:0045995)	71	29	10.15	+	0.0009909
regulation of developmental growth (GO:0048638)	123	41	17.59	+	0.001216
vesicle localization (GO:0051648)	93	34	13.3	+	0.001392
tissue morphogenesis (GO:0048729)	311	79	44.47	+	0.001458
developmental growth (GO:0048589)	143	45	20.45	+	0.001687
regulation of cytoskeleton organization (GO:0051493)	94	34	13.44	+	0.001749
sensory perception (GO:0007600)	352	21	50.33	-	0.002096
regulation of protein localization (GO:0032880)	78	30	11.15	+	0.002135
compound eye photoreceptor cell differentiation (GO:0001751)	140	44	20.02	+	0.002261
growth (GO:0040007)	178	52	25.45	+	0.002289
establishment of synaptic vesicle localization (GO:0097480)	91	33	13.01	+	0.002338
synaptic vesicle localization (GO:0097479)	91	33	13.01	+	0.002338
synaptic vesicle transport (GO:0048489)	91	33	13.01	+	0.002338
cellular lipid metabolic process (GO:0044255)	238	64	34.03	+	0.002475
germarium-derived oocyte differentiation (GO:0030706)	33	18	4.718	+	0.002514
cellular component assembly (GO:0022607)	700	148	100.1	+	0.002523
regulation of Notch signaling pathway (GO:0008593)	96	34	13.73	+	0.00273
regulation of response to stress (GO:0080134)	194	55	27.74	+	0.002819
cell maturation (GO:0048469)	146	45	20.88	+	0.002857
germarium-derived oocyte fate determination (GO:0007294)	30	17	4.289	+	0.002887
establishment of vesicle localization (GO:0051650)	92	33	13.15	+	0.00293
epithelial cell development (GO:0002064)	291	74	41.61	+	0.002997
synaptic vesicle endocytosis (GO:0048488)	44	21	6.291	+	0.003004
synaptic vesicle recycling (GO:0036465)	44	21	6.291	+	0.003004
post-embryonic appendage morphogenesis (GO:0035120)	382	91	54.62	+	0.003157
single-organism cellular localization (GO:1902580)	128	41	18.3	+	0.003159
single-organism localization (GO:1902578)	128	41	18.3	+	0.003159
protein metabolic process (GO:0019538)	1877	340	268.4	+	0.003161
nuclear-transcribed mRNA catabolic process (GO:0000956)	27	16	3.861	+	0.003222
regulation of establishment of protein localization (GO:0070201)	68	27	9.723	+	0.003839
regulation of protein transport (GO:0051223)	64	26	9.151	+	0.003872
nucleobase-containing compound biosynthetic process (GO:0034654)	310	77	44.32	+	0.004339
response to chemical (GO:0042221)	819	167	117.1	+	0.0044
oocyte fate determination (GO:0030716)	31	17	4.432	+	0.004418
regulation of cellular component size (GO:0032535)	103	35	14.73	+	0.004747
gene expression (GO:0010467)	886	178	126.7	+	0.004938
protein ubiquitination involved in ubiquitin-dependent protein catabolic process (GO:0042787)	35	18	5.004	+	0.005564
germarium-derived egg chamber formation (GO:0007293)	82	30	11.72	+	0.005585
positive regulation of catalytic activity (GO:0043085)	95	33	13.58	+	0.005634
regulation of synaptic growth at neuromuscular junction (GO:0008582)	78	29	11.15	+	0.005901
imaginal disc-derived appendage morphogenesis (GO:0035114)	389	91	55.62	+	0.006329
female meiotic division (GO:0007143)	70	27	10.01	+	0.006419
detection of chemical stimulus (GO:0009593)	134	3	19.16	-	0.006494
heterocycle biosynthetic process (GO:0018130)	380	89	54.33	+	0.007641
oocyte development (GO:0048599)	124	39	17.73	+	0.008172
regulation of mRNA metabolic process (GO:1903311)	71	27	10.15	+	0.008231
appendage morphogenesis (GO:0035107)	392	91	56.05	+	0.00845
negative regulation of mitotic cell cycle phase transition (GO:1901991)	106	35	15.16	+	0.008645
negative regulation of cell cycle phase transition (GO:1901988)	106	35	15.16	+	0.008645
DNA recombination (GO:0006310)	55	23	7.864	+	0.008719
mitotic nuclear division (GO:0007067)	192	53	27.45	+	0.008769
positive regulation of organelle organization (GO:0010638)	59	24	8.436	+	0.008789
columnar/cuboidal epithelial cell differentiation (GO:0002065)	269	68	38.46	+	0.008986
imaginal disc-derived appendage development (GO:0048737)	393	91	56.19	+	0.009293
wing disc morphogenesis (GO:0007472)	344	82	49.19	+	0.009388
aromatic compound biosynthetic process (GO:0019438)	377	88	53.9	+	0.009712
localization of cell (GO:0051674)	254	65	36.32	+	0.009715
regulation of anatomical structure size (GO:0090066)	168	48	24.02	+	0.009715
cellular response to chemical stimulus (GO:0070887)	214	57	30.6	+	0.01125
macromolecular complex subunit organization (GO:0043933)	674	140	96.37	+	0.01127
negative regulation of cell cycle process (GO:0010948)	112	36	16.01	+	0.01141
positive regulation of protein modification process (GO:0031401)	56	23	8.007	+	0.01155
regulation of cell development (GO:0060284)	194	53	27.74	+	0.01157
ovarian follicle cell development (GO:0030707)	266	67	38.03	+	0.01165
positive regulation of GTPase activity (GO:0043547)	30	16	4.289	+	0.01172
negative regulation of gene expression (GO:0010629)	330	79	47.18	+	0.01177
cellular component biogenesis (GO:0044085)	769	156	110	+	0.01201
oocyte construction (GO:0007308)	117	37	16.73	+	0.01227
appendage development (GO:0048736)	396	91	56.62	+	0.01232
phagocytosis (GO:0006909)	220	58	31.46	+	0.01262
cell motility (GO:0048870)	246	63	35.17	+	0.01295
columnar/cuboidal epithelial cell development (GO:0002066)	267	67	38.18	+	0.01307
maintenance of location (GO:0051235)	73	27	10.44	+	0.01333
cell migration (GO:0016477)	236	61	33.74	+	0.01355
oocyte axis specification (GO:0007309)	113	36	16.16	+	0.01372
central nervous system development (GO:0007417)	231	60	33.03	+	0.01382
response to organic substance (GO:0010033)	300	73	42.89	+	0.01489
regulation of cell size (GO:0008361)	61	24	8.722	+	0.01497
imaginal disc-derived wing morphogenesis (GO:0007476)	338	80	48.33	+	0.0153
negative regulation of cellular component organization (GO:0051129)	109	35	15.59	+	0.01531
polysaccharide metabolic process (GO:0005976)	15	11	2.145	+	0.01633
cellular polysaccharide metabolic process (GO:0044264)	15	11	2.145	+	0.01633
positive regulation of phosphorylation (GO:0042327)	87	30	12.44	+	0.01682
mitotic DNA integrity checkpoint (GO:0044774)	74	27	10.58	+	0.01683
cell fate commitment (GO:0045165)	478	105	68.35	+	0.01706
RNA interference (GO:0016246)	31	16	4.432	+	0.01736
DNA biosynthetic process (GO:0071897)	31	16	4.432	+	0.01736
regulation of mRNA processing (GO:0050684)	70	26	10.01	+	0.0178
establishment or maintenance of microtubule cytoskeleton polarity (GO:0030951)	42	19	6.005	+	0.01807
regulation of cellular response to stress (GO:0080135)	83	29	11.87	+	0.01826
mitotic sister chromatid segregation (GO:0000070)	66	25	9.437	+	0.01866
regulation of intracellular protein transport (GO:0033157)	50	21	7.149	+	0.0198
regulation of gene silencing (GO:0060968)	58	23	8.293	+	0.01982
nucleotide-excision repair (GO:0006289)	28	15	4.004	+	0.02069
cellular nitrogen compound biosynthetic process (GO:0044271)	374	86	53.48	+	0.02075
DNA integrity checkpoint (GO:0031570)	84	29	12.01	+	0.02259
cell cycle checkpoint (GO:0000075)	102	33	14.58	+	0.02289
morphogenesis of a polarized epithelium (GO:0001738)	102	33	14.58	+	0.02289
nucleobase-containing compound catabolic process (GO:0034655)	130	39	18.59	+	0.02291
macromolecule biosynthetic process (GO:0009059)	696	142	99.52	+	0.02291
photoreceptor cell development (GO:0042461)	93	31	13.3	+	0.02312
mushroom body development (GO:0016319)	67	25	9.58	+	0.02378
regulation of RNA splicing (GO:0043484)	67	25	9.58	+	0.02378
negative regulation of growth (GO:0045926)	80	28	11.44	+	0.02451
positive regulation of transport (GO:0051050)	80	28	11.44	+	0.02451
long-term memory (GO:0007616)	63	24	9.008	+	0.02486
cellular carbohydrate metabolic process (GO:0044262)	47	20	6.72	+	0.02583
regulation of RNA biosynthetic process (GO:2001141)	793	158	113.4	+	0.02618
regulation of transcription, DNA-templated (GO:0006355)	793	158	113.4	+	0.02618
DNA metabolic process (GO:0006259)	399	90	57.05	+	0.02681
microtubule-based process (GO:0007017)	501	108	71.63	+	0.02757
cellular macromolecule biosynthetic process (GO:0034645)	687	140	98.23	+	0.02763
glycogen metabolic process (GO:0005977)	8	8	1.144	+	0.02772
energy reserve metabolic process (GO:0006112)	8	8	1.144	+	0.02772
cellular glucan metabolic process (GO:0006073)	8	8	1.144	+	0.02772
glucan metabolic process (GO:0044042)	8	8	1.144	+	0.02772
neurotransmitter secretion (GO:0007269)	94	31	13.44	+	0.02815
embryonic morphogenesis (GO:0048598)	232	59	33.17	+	0.02919
organic cyclic compound biosynthetic process (GO:1901362)	417	93	59.62	+	0.02985
mRNA processing (GO:0006397)	248	62	35.46	+	0.03012
mitotic cell cycle checkpoint (GO:0007093)	90	30	12.87	+	0.03108
regulation of intracellular transport (GO:0032386)	64	24	9.151	+	0.03175
signal release (GO:0023061)	95	31	13.58	+	0.03417
biosynthetic process (GO:0009058)	1126	212	161	+	0.03475
regulation of phosphorylation (GO:0042325)	172	47	24.59	+	0.03515
organic substance biosynthetic process (GO:1901576)	1077	204	154	+	0.03517
mitotic DNA damage checkpoint (GO:0044773)	73	26	10.44	+	0.03547
mRNA transport (GO:0051028)	33	16	4.718	+	0.03631
positive regulation of Ras GTPase activity (GO:0032320)	26	14	3.718	+	0.03657
heterocycle catabolic process (GO:0046700)	143	41	20.45	+	0.0389
Ras protein signal transduction (GO:0007265)	78	27	11.15	+	0.04078
eye photoreceptor cell development (GO:0042462)	78	27	11.15	+	0.04078
regulation of cell projection organization (GO:0031344)	87	29	12.44	+	0.04178
actin filament organization (GO:0007015)	110	34	15.73	+	0.04223
cellular response to nitrogen compound (GO:1901699)	41	18	5.862	+	0.04346
establishment or maintenance of cytoskeleton polarity (GO:0030952)	45	19	6.434	+	0.04508
maintenance of protein location (GO:0045185)	49	20	7.006	+	0.0456
cell proliferation (GO:0008283)	179	48	25.59	+	0.04579
locomotory behavior (GO:0007626)	174	47	24.88	+	0.04613
histone modification (GO:0016570)	97	31	13.87	+	0.04981
covalent chromatin modification (GO:0016569)	97	31	13.87	+	0.04981
cytokinesis (GO:0000910)	97	31	13.87	+	0.04981
positive regulation of protein phosphorylation (GO:0001934)	34	16	4.861	+	0.05134
regulation of protein import into nucleus (GO:0042306)	34	16	4.861	+	0.05134
cellular biosynthetic process (GO:0044249)	1049	198	150	+	0.05607
lipid modification (GO:0030258)	58	22	8.293	+	0.05656
border follicle cell migration (GO:0007298)	107	33	15.3	+	0.05663
positive regulation of hydrolase activity (GO:0051345)	54	21	7.721	+	0.05861
positive regulation of phosphorus metabolic process (GO:0010562)	98	31	14.01	+	0.05984
positive regulation of phosphate metabolic process (GO:0045937)	98	31	14.01	+	0.05984
dorsal closure (GO:0007391)	98	31	14.01	+	0.05984
cellular nitrogen compound catabolic process (GO:0044270)	141	40	20.16	+	0.06006
aromatic compound catabolic process (GO:0019439)	141	40	20.16	+	0.06006
embryonic development via the syncytial blastoderm (GO:0001700)	171	46	24.45	+	0.06073
morphogenesis of embryonic epithelium (GO:0016331)	117	35	16.73	+	0.06206
pattern specification process (GO:0007389)	506	107	72.35	+	0.06289
dendrite development (GO:0016358)	192	50	27.45	+	0.06547
regulation of mRNA splicing, via spliceosome (GO:0048024)	63	23	9.008	+	0.0682
regulation of neuron projection development (GO:0010975)	63	23	9.008	+	0.0682
single-organism behavior (GO:0044708)	382	85	54.62	+	0.06995
membrane organization (GO:0061024)	152	42	21.73	+	0.07046
regulation of protein localization to nucleus (GO:1900180)	35	16	5.004	+	0.07161
sister chromatid segregation (GO:0000819)	72	25	10.29	+	0.0737
synapse assembly (GO:0007416)	55	21	7.864	+	0.07545
glycerolipid metabolic process (GO:0046486)	81	27	11.58	+	0.07561
establishment or maintenance of epithelial cell apical/basal polarity (GO:0045197)	28	14	4.004	+	0.07956
negative regulation of cellular metabolic process (GO:0031324)	395	87	56.48	+	0.08109
recombinational repair (GO:0000725)	18	11	2.574	+	0.08261
double-strand break repair via homologous recombination (GO:0000724)	18	11	2.574	+	0.08261
compound eye photoreceptor development (GO:0042051)	77	26	11.01	+	0.08317
cellularization (GO:0007349)	100	31	14.3	+	0.08557
positive regulation of growth (GO:0045927)	73	25	10.44	+	0.09105
organic cyclic compound catabolic process (GO:1901361)	149	41	21.3	+	0.09317
ovarian follicle cell migration (GO:0007297)	115	34	16.44	+	0.09762
oocyte microtubule cytoskeleton organization (GO:0016325)	36	16	5.147	+	0.0986
glycerophospholipid metabolic process (GO:0006650)	69	24	9.866	+	0.09914
mitotic G2/M transition checkpoint (GO:0044818)	69	24	9.866	+	0.09914
neuromuscular junction development (GO:0007528)	69	24	9.866	+	0.09914
regulation of neurotransmitter levels (GO:0001505)	101	31	14.44	+	0.1018
brain development (GO:0007420)	125	36	17.87	+	0.1028
regulation of nucleocytoplasmic transport (GO:0046822)	40	17	5.719	+	0.1029
establishment of cell polarity (GO:0030010)	40	17	5.719	+	0.1029
phospholipid metabolic process (GO:0006644)	97	30	13.87	+	0.1149
meiotic chromosome segregation (GO:0045132)	61	22	8.722	+	0.1152
vesicle organization (GO:0016050)	57	21	8.15	+	0.1226
behavior (GO:0007610)	521	108	74.49	+	0.1227
regulation of protein modification process (GO:0031399)	141	39	20.16	+	0.123
ncRNA metabolic process (GO:0034660)	146	40	20.88	+	0.1231
female meiosis chromosome segregation (GO:0016321)	33	15	4.718	+	0.1266
endosomal transport (GO:0016197)	66	23	9.437	+	0.1334
intracellular mRNA localization (GO:0008298)	66	23	9.437	+	0.1334
RNA 3'-end processing (GO:0031123)	49	19	7.006	+	0.1341
maintenance of protein location in cell (GO:0032507)	45	18	6.434	+	0.1371
regulation of multi-organism process (GO:0043900)	127	36	18.16	+	0.139
tissue migration (GO:0090130)	152	41	21.73	+	0.1406
ameboidal cell migration (GO:0001667)	147	40	21.02	+	0.1414
positive regulation of cellular component biogenesis (GO:0044089)	26	13	3.718	+	0.1415
positive regulation of cellular biosynthetic process (GO:0031328)	323	73	46.18	+	0.1418
positive regulation of biosynthetic process (GO:0009891)	323	73	46.18	+	0.1418
regulation of gene silencing by RNA (GO:0060966)	16	10	2.288	+	0.144
establishment of spindle orientation (GO:0051294)	16	10	2.288	+	0.144
response to abiotic stimulus (GO:0009628)	341	76	48.76	+	0.1583
Golgi organization (GO:0007030)	67	23	9.58	+	0.1651
RNA biosynthetic process (GO:0032774)	174	45	24.88	+	0.1719
positive regulation of synapse assembly (GO:0051965)	23	12	3.289	+	0.1721
positive regulation of nervous system development (GO:0051962)	23	12	3.289	+	0.1721
maintenance of location in cell (GO:0051651)	50	19	7.149	+	0.1725
protein modification by small protein removal (GO:0070646)	50	19	7.149	+	0.1725
memory (GO:0007613)	90	28	12.87	+	0.1737
lipid metabolic process (GO:0006629)	365	80	52.19	+	0.1794
regulation of microtubule cytoskeleton organization (GO:0070507)	38	16	5.433	+	0.1803
positive regulation of protein transport (GO:0051222)	38	16	5.433	+	0.1803
protein deubiquitination (GO:0016579)	42	17	6.005	+	0.1815
DNA damage checkpoint (GO:0000077)	81	26	11.58	+	0.1819
detection of stimulus (GO:0051606)	198	11	28.31	-	0.1841
single-organism carbohydrate metabolic process (GO:0044723)	185	47	26.45	+	0.1852
epithelial cell migration (GO:0010631)	144	39	20.59	+	0.1865
epithelium migration (GO:0090132)	144	39	20.59	+	0.1865
organelle assembly (GO:0070925)	201	50	28.74	+	0.1907
positive regulation of macromolecule biosynthetic process (GO:0010557)	288	66	41.18	+	0.2005
meiosis I (GO:0007127)	68	23	9.723	+	0.2032
mitotic G2 DNA damage checkpoint (GO:0007095)	68	23	9.723	+	0.2032
G2 DNA damage checkpoint (GO:0031572)	68	23	9.723	+	0.2032
immune effector process (GO:0002252)	55	20	7.864	+	0.2078
axis specification (GO:0009798)	202	50	28.88	+	0.2135
embryo development ending in birth or egg hatching (GO:0009792)	181	46	25.88	+	0.214
protein complex subunit organization (GO:0071822)	612	122	87.51	+	0.2151
regulation of vesicle-mediated transport (GO:0060627)	64	22	9.151	+	0.2224
autophagy (GO:0006914)	64	22	9.151	+	0.2224
transcription, DNA-templated (GO:0006351)	171	44	24.45	+	0.2245
transmembrane receptor protein serine/threonine kinase signaling pathway (GO:0007178)	47	18	6.72	+	0.2305
chitin metabolic process (GO:0006030)	117	4	16.73	-	0.2312
negative regulation of gene silencing (GO:0060969)	17	10	2.431	+	0.2325
regulation of Rho GTPase activity (GO:0032319)	14	9	2.002	+	0.25
dendrite morphogenesis (GO:0048813)	188	47	26.88	+	0.2627
enzyme linked receptor protein signaling pathway (GO:0007167)	162	42	23.16	+	0.2648
regulation of neuron differentiation (GO:0045664)	102	30	14.58	+	0.2654
positive regulation of developmental process (GO:0051094)	107	31	15.3	+	0.2724
postreplication repair (GO:0006301)	6	6	0.8579	+	0.2809
regulation of neurogenesis (GO:0050767)	137	37	19.59	+	0.2834
regulation of endocytosis (GO:0030100)	32	14	4.575	+	0.307
encapsulation of foreign target (GO:0035010)	40	16	5.719	+	0.3155
negative regulation of developmental process (GO:0051093)	174	44	24.88	+	0.3217
regionalization (GO:0003002)	459	95	65.63	+	0.3247
regulation of nuclear division (GO:0051783)	66	22	9.437	+	0.3359
muscle structure development (GO:0061061)	217	52	31.03	+	0.3402
glycoprotein biosynthetic process (GO:0009101)	80	25	11.44	+	0.3536
response to radiation (GO:0009314)	149	39	21.3	+	0.3598
spindle localization (GO:0051653)	25	12	3.575	+	0.3621
establishment of spindle localization (GO:0051293)	25	12	3.575	+	0.3621
dosage compensation (GO:0007549)	18	10	2.574	+	0.3628
cognition (GO:0050890)	134	36	19.16	+	0.3738
learning or memory (GO:0007611)	134	36	19.16	+	0.3738
nucleosome assembly (GO:0006334)	136	6	19.45	-	0.3823
single-organism biosynthetic process (GO:0044711)	485	99	69.35	+	0.388
regulation of microtubule-based process (GO:0032886)	45	17	6.434	+	0.3958
maternal determination of anterior/posterior axis, embryo (GO:0008358)	76	24	10.87	+	0.3972
nuclear-transcribed mRNA catabolic process, nonsense-mediated decay (GO:0000184)	15	9	2.145	+	0.4104
mitochondrion localization (GO:0051646)	15	9	2.145	+	0.4104
regulation of transcription elongation from RNA polymerase II promoter (GO:0034243)	15	9	2.145	+	0.4104
regulation of translation (GO:0006417)	81	25	11.58	+	0.4223
response to dsRNA (GO:0043331)	12	8	1.716	+	0.4319
establishment of mitotic spindle orientation (GO:0000132)	12	8	1.716	+	0.4319
dsRNA fragmentation (GO:0031050)	12	8	1.716	+	0.4319
production of small RNA involved in gene silencing by RNA (GO:0070918)	12	8	1.716	+	0.4319
cellular response to dsRNA (GO:0071359)	12	8	1.716	+	0.4319
positive regulation of intracellular signal transduction (GO:1902533)	125	34	17.87	+	0.4334
striated muscle cell differentiation (GO:0051146)	86	26	12.3	+	0.4434
oocyte anterior/posterior axis specification (GO:0007314)	72	23	10.29	+	0.4451
oocyte microtubule cytoskeleton polarization (GO:0008103)	22	11	3.146	+	0.4508
membrane budding (GO:0006900)	22	11	3.146	+	0.4508
actomyosin structure organization (GO:0031032)	59	20	8.436	+	0.4992
neurotransmitter transport (GO:0006836)	116	32	16.59	+	0.4994
glycoprotein metabolic process (GO:0009100)	82	25	11.72	+	0.5024
germ-line cyst formation (GO:0048134)	26	12	3.718	+	0.51
regulation of cell proliferation (GO:0042127)	157	40	22.45	+	0.5101
establishment or maintenance of apical/basal cell polarity (GO:0035088)	38	15	5.433	+	0.5482
establishment or maintenance of bipolar cell polarity (GO:0061245)	38	15	5.433	+	0.5482
regulation of DNA metabolic process (GO:0051052)	38	15	5.433	+	0.5482
smoothened signaling pathway (GO:0007224)	34	14	4.861	+	0.5538
respiratory system development (GO:0060541)	212	50	30.31	+	0.6168
production of miRNAs involved in gene silencing by miRNA (GO:0035196)	7	6	1.001	+	0.6282
negative regulation of developmental growth (GO:0048640)	47	17	6.72	+	0.6383
actin cytoskeleton reorganization (GO:0031532)	23	11	3.289	+	0.6472
regulation of transcription factor import into nucleus (GO:0042990)	23	11	3.289	+	0.6472
cellular response to organic cyclic compound (GO:0071407)	43	16	6.148	+	0.6787
protein localization to nucleus (GO:0034504)	43	16	6.148	+	0.6787
response to nitrogen compound (GO:1901698)	84	25	12.01	+	0.7035
regulation of oocyte development (GO:0060281)	27	12	3.861	+	0.7057
regulation of embryonic pattern specification (GO:1902875)	27	12	3.861	+	0.7057
regulation of pole plasm oskar mRNA localization (GO:0007317)	27	12	3.861	+	0.7057
polysaccharide biosynthetic process (GO:0000271)	10	7	1.43	+	0.7388
cellular polysaccharide biosynthetic process (GO:0033692)	10	7	1.43	+	0.7388
regulation of MAPK cascade (GO:0043408)	99	28	14.16	+	0.7532
regulation of cell division (GO:0051302)	80	24	11.44	+	0.8002
regulation of DNA-templated transcription, elongation (GO:0032784)	20	10	2.86	+	0.8083
negative regulation of cell proliferation (GO:0008285)	57	19	8.15	+	0.8282
regulation of alternative mRNA splicing, via spliceosome (GO:0000381)	57	19	8.15	+	0.8282
cytoplasmic transport (GO:0016482)	226	52	32.31	+	0.8315
detection of chemical stimulus involved in sensory perception (GO:0050907)	66	1	9.437	-	0.8642
small GTPase mediated signal transduction (GO:0007264)	120	32	17.16	+	0.865
response to nutrient levels (GO:0031667)	105	29	15.01	+	0.8776
positive regulation of nitrogen compound metabolic process (GO:0051173)	311	67	44.47	+	0.8954
carbohydrate metabolic process (GO:0005975)	277	61	39.61	+	0.8969
response to ionizing radiation (GO:0010212)	24	11	3.432	+	0.9103
protein import into nucleus (GO:0006606)	40	15	5.719	+	0.9129
protein targeting to nucleus (GO:0044744)	40	15	5.719	+	0.9129
tRNA aminoacylation for protein translation (GO:0006418)	40	15	5.719	+	0.9129
single-organism nuclear import (GO:1902593)	40	15	5.719	+	0.9129
regulation of Rho protein signal transduction (GO:0035023)	40	15	5.719	+	0.9129
asymmetric protein localization (GO:0008105)	40	15	5.719	+	0.9129
cytoskeleton-dependent cytokinesis (GO:0061640)	81	24	11.58	+	0.9444
cell-cell signaling involved in cell fate commitment (GO:0045168)	211	49	30.17	+	0.9574
lateral inhibition (GO:0046331)	211	49	30.17	+	0.9574
nucleus organization (GO:0006997)	49	17	7.006	+	0.9984
nurse cell nucleus anchoring (GO:0007302)	1	1	0.143	+	1
positive regulation of Golgi vesicle fusion to target membrane (GO:0048215)	1	1	0.143	+	1
regulation of Golgi vesicle fusion to target membrane (GO:0048214)	1	1	0.143	+	1
Golgi to vacuole transport (GO:0006896)	1	1	0.143	+	1
glutamine transport (GO:0006868)	1	1	0.143	+	1
mitochondrial calcium ion transport (GO:0006851)	1	1	0.143	+	1
metencephalon development (GO:0022037)	1	1	0.143	+	1
nuclear-transcribed mRNA catabolic process, exonucleolytic (GO:0000291)	1	1	0.143	+	1
subsynaptic reticulum organization (GO:1990255)	1	1	0.143	+	1
protein glycosylation in Golgi (GO:0033578)	1	1	0.143	+	1
DNA replication, Okazaki fragment processing (GO:0033567)	1	1	0.143	+	1
cell proliferation involved in compound eye morphogenesis (GO:0035736)	1	1	0.143	+	1
cerebellum morphogenesis (GO:0021587)	1	1	0.143	+	1
hindbrain morphogenesis (GO:0021575)	1	1	0.143	+	1
long term synaptic depression (GO:0060292)	1	1	0.143	+	1
galactose homeostasis (GO:0033501)	1	1	0.143	+	1
cerebellum development (GO:0021549)	1	1	0.143	+	1
HAC1-type intron splice site recognition and cleavage (GO:0070055)	1	1	0.143	+	1
mRNA splicing, via endonucleolytic cleavage and ligation (GO:0070054)	1	1	0.143	+	1
negative regulation of double-strand break repair via single-strand annealing (GO:1901291)	1	1	0.143	+	1
neuronal action potential propagation (GO:0019227)	1	1	0.143	+	1
pyridoxal 5'-phosphate salvage (GO:0009443)	1	1	0.143	+	1
STAT protein import into nucleus (GO:0007262)	1	1	0.143	+	1
tyrosine phosphorylation of STAT protein (GO:0007260)	1	1	0.143	+	1
spinal cord dorsal/ventral patterning (GO:0021513)	1	1	0.143	+	1
spinal cord patterning (GO:0021511)	1	1	0.143	+	1
spinal cord development (GO:0021510)	1	1	0.143	+	1
negative regulation of cell-matrix adhesion (GO:0001953)	1	1	0.143	+	1
regulation of long-term neuronal synaptic plasticity (GO:0048169)	1	1	0.143	+	1
postsynaptic membrane organization (GO:0001941)	1	1	0.143	+	1
positive regulation of transcription of Notch receptor target (GO:0007221)	1	1	0.143	+	1
pyridoxal phosphate biosynthetic process (GO:0042823)	1	1	0.143	+	1
pyridoxal phosphate metabolic process (GO:0042822)	1	1	0.143	+	1
response to BMP (GO:0071772)	1	1	0.143	+	1
protein arginylation (GO:0016598)	1	1	0.143	+	1
mRNA modification (GO:0016556)	1	1	0.143	+	1
base conversion or substitution editing (GO:0016553)	1	1	0.143	+	1
stress response to cadmium ion (GO:1990170)	1	1	0.143	+	1
MAPK import into nucleus (GO:0000189)	1	1	0.143	+	1
activation of MAPKKK activity (GO:0000185)	1	1	0.143	+	1
cargo loading into clathrin-coated vesicle (GO:0035652)	1	1	0.143	+	1
telomere maintenance in response to DNA damage (GO:0043247)	1	1	0.143	+	1
locomotory exploration behavior (GO:0035641)	1	1	0.143	+	1
exploration behavior (GO:0035640)	1	1	0.143	+	1
ceramide transport (GO:0035627)	1	1	0.143	+	1
ER to Golgi ceramide transport (GO:0035621)	1	1	0.143	+	1
negative regulation of adherens junction organization (GO:1903392)	1	1	0.143	+	1
regulation of adherens junction organization (GO:1903391)	1	1	0.143	+	1
carbohydrate storage (GO:0052576)	1	1	0.143	+	1
carbohydrate localization (GO:0052575)	1	1	0.143	+	1
signal complex assembly (GO:0007172)	1	1	0.143	+	1
tRNA 3'-end processing (GO:0042780)	1	1	0.143	+	1
tRNA 3'-trailer cleavage (GO:0042779)	1	1	0.143	+	1
male germ-line sex determination (GO:0019100)	1	1	0.143	+	1
R3/R4 development (GO:0048057)	1	1	0.143	+	1
GDP-fucose import into endoplasmic reticulum lumen (GO:0036084)	1	1	0.143	+	1
D-xylose metabolic process (GO:0042732)	1	1	0.143	+	1
purine nucleotide-sugar transport (GO:0036079)	1	1	0.143	+	1
cytokinesis, completion of separation (GO:0007109)	1	1	0.143	+	1
protein O-linked fucosylation (GO:0036066)	1	1	0.143	+	1
nucleus-associated proteasomal ubiquitin-dependent protein catabolic process (GO:0071630)	1	1	0.143	+	1
sphingomyelin biosynthetic process (GO:0006686)	1	1	0.143	+	1
regulation of border follicle cell delamination (GO:0030710)	1	1	0.143	+	1
phosphatidylserine biosynthetic process (GO:0006659)	1	1	0.143	+	1
phosphatidylserine metabolic process (GO:0006658)	1	1	0.143	+	1
phosphatidylcholine biosynthetic process (GO:0006656)	1	1	0.143	+	1
phosphatidylglycerol biosynthetic process (GO:0006655)	1	1	0.143	+	1
myeloid leukocyte activation (GO:0002274)	1	1	0.143	+	1
sulfur amino acid catabolic process (GO:0000098)	1	1	0.143	+	1
negative regulation of synaptic vesicle transport (GO:1902804)	1	1	0.143	+	1
snRNP protein import into nucleus (GO:0006608)	1	1	0.143	+	1
entry into diapause (GO:0055115)	1	1	0.143	+	1
DNA synthesis involved in double-strand break repair via homologous recombination (GO:0043150)	1	1	0.143	+	1
leukocyte activation (GO:0045321)	1	1	0.143	+	1
positive regulation of antimicrobial peptide production (GO:0002225)	1	1	0.143	+	1
peptide modification (GO:0031179)	1	1	0.143	+	1
mitochondrial RNA localization (GO:0019093)	1	1	0.143	+	1
mitochondrial rRNA export from mitochondrion (GO:0019090)	1	1	0.143	+	1
regulation of mitotic recombination (GO:0000019)	1	1	0.143	+	1
proteasome localization (GO:0031144)	1	1	0.143	+	1
sister chromatid biorientation (GO:0031134)	1	1	0.143	+	1
deoxyribonucleotide catabolic process (GO:0009264)	1	1	0.143	+	1
positive regulation of microtubule depolymerization (GO:0031117)	1	1	0.143	+	1
negative regulation of microtubule polymerization (GO:0031115)	1	1	0.143	+	1
septin ring organization (GO:0031106)	1	1	0.143	+	1
long-chain fatty acid transport (GO:0015909)	1	1	0.143	+	1
fatty acid transport (GO:0015908)	1	1	0.143	+	1
menaquinone biosynthetic process (GO:0009234)	1	1	0.143	+	1
menaquinone metabolic process (GO:0009233)	1	1	0.143	+	1
activation of Cdc42 GTPase activity (GO:0032864)	1	1	0.143	+	1
activation of Ral GTPase activity (GO:0032859)	1	1	0.143	+	1
activation of Rab GTPase activity (GO:0032858)	1	1	0.143	+	1
positive regulation of Ral GTPase activity (GO:0032852)	1	1	0.143	+	1
detoxification of cadmium ion (GO:0071585)	1	1	0.143	+	1
histone H3-K27 demethylation (GO:0071557)	1	1	0.143	+	1
activation of tryptophan 5-monooxygenase activity (GO:0006588)	1	1	0.143	+	1
valine catabolic process (GO:0006574)	1	1	0.143	+	1
genetic imprinting (GO:0071514)	1	1	0.143	+	1
male meiotic chromosome movement towards spindle pole (GO:0016346)	1	1	0.143	+	1
meiotic chromosome movement towards spindle pole (GO:0016344)	1	1	0.143	+	1
threonine catabolic process (GO:0006567)	1	1	0.143	+	1
threonine metabolic process (GO:0006566)	1	1	0.143	+	1
calcium-independent cell-cell adhesion (GO:0016338)	1	1	0.143	+	1
leucine catabolic process (GO:0006552)	1	1	0.143	+	1
isoleucine catabolic process (GO:0006550)	1	1	0.143	+	1
isoleucine metabolic process (GO:0006549)	1	1	0.143	+	1
glutamine catabolic process (GO:0006543)	1	1	0.143	+	1
protein deglycosylation (GO:0006517)	1	1	0.143	+	1
C-terminal protein lipidation (GO:0006501)	1	1	0.143	+	1
positive regulation of cation channel activity (GO:2001259)	1	1	0.143	+	1
regulation of cation channel activity (GO:2001257)	1	1	0.143	+	1
protein localization to synapse (GO:0035418)	1	1	0.143	+	1
maintenance of rDNA (GO:0043007)	1	1	0.143	+	1
urea transport (GO:0015840)	1	1	0.143	+	1
iron assimilation (GO:0033212)	1	1	0.143	+	1
3'-phosphoadenosine 5'-phosphosulfate transport (GO:0046963)	1	1	0.143	+	1
proline transport (GO:0015824)	1	1	0.143	+	1
tRNA 5'-leader removal (GO:0001682)	1	1	0.143	+	1
positive regulation of CREB transcription factor activity (GO:0032793)	1	1	0.143	+	1
negative regulation of double-strand break repair (GO:2000780)	1	1	0.143	+	1
positive regulation of monooxygenase activity (GO:0032770)	1	1	0.143	+	1
hyperosmotic salinity response (GO:0042538)	1	1	0.143	+	1
cellular hyperosmotic salinity response (GO:0071475)	1	1	0.143	+	1
cellular hyperosmotic response (GO:0071474)	1	1	0.143	+	1
cellular response to salt stress (GO:0071472)	1	1	0.143	+	1
negative regulation of stem cell differentiation (GO:2000737)	1	1	0.143	+	1
negative regulation of protein kinase B signaling (GO:0051898)	1	1	0.143	+	1
regulation of protein kinase B signaling (GO:0051896)	1	1	0.143	+	1
negative regulation of focal adhesion assembly (GO:0051895)	1	1	0.143	+	1
regulation of focal adhesion assembly (GO:0051893)	1	1	0.143	+	1
negative regulation of neuron projection development (GO:0010977)	1	1	0.143	+	1
positive regulation of neuron projection development (GO:0010976)	1	1	0.143	+	1
peptide bond cleavage involved in epidermal growth factor receptor ligand maturation (GO:0038005)	1	1	0.143	+	1
oligosaccharide-lipid intermediate biosynthetic process (GO:0006490)	1	1	0.143	+	1
regulation of microtubule nucleation (GO:0010968)	1	1	0.143	+	1
O-glycan processing, core 1 (GO:0016267)	1	1	0.143	+	1
glutamate secretion (GO:0014047)	1	1	0.143	+	1
entry into other organism involved in symbiotic interaction (GO:0051828)	1	1	0.143	+	1
maintenance of chromatin silencing at telomere (GO:0035392)	1	1	0.143	+	1
histidyl-tRNA aminoacylation (GO:0006427)	1	1	0.143	+	1
regulation of Roundabout signaling pathway (GO:0035386)	1	1	0.143	+	1
glandular epithelial cell differentiation (GO:0002067)	1	1	0.143	+	1
NADPH oxidation (GO:0070995)	1	1	0.143	+	1
entry into cell of other organism involved in symbiotic interaction (GO:0051806)	1	1	0.143	+	1
positive regulation of histone ubiquitination (GO:0033184)	1	1	0.143	+	1
regulation of histone ubiquitination (GO:0033182)	1	1	0.143	+	1
protein localization to endoplasmic reticulum exit site (GO:0070973)	1	1	0.143	+	1
negative regulation of reciprocal meiotic recombination (GO:0045128)	1	1	0.143	+	1
myo-inositol transport (GO:0015798)	1	1	0.143	+	1
polyol transport (GO:0015791)	1	1	0.143	+	1
conversion of ds siRNA to ss siRNA involved in RNA interference (GO:0033168)	1	1	0.143	+	1
UDP-N-acetylgalactosamine transport (GO:0015789)	1	1	0.143	+	1
positive regulation of histone H2B ubiquitination (GO:2001168)	1	1	0.143	+	1
regulation of histone H2B ubiquitination (GO:2001166)	1	1	0.143	+	1
GDP-mannose transport (GO:0015784)	1	1	0.143	+	1
GDP-fucose transport (GO:0015783)	1	1	0.143	+	1
galactose transport (GO:0015757)	1	1	0.143	+	1
UV-damage excision repair (GO:0070914)	1	1	0.143	+	1
methionine catabolic process (GO:0009087)	1	1	0.143	+	1
branched-chain amino acid biosynthetic process (GO:0009082)	1	1	0.143	+	1
formate transport (GO:0015724)	1	1	0.143	+	1
vasculogenesis (GO:0001570)	1	1	0.143	+	1
negative regulation of extracellular matrix organization (GO:1903054)	1	1	0.143	+	1
blood vessel development (GO:0001568)	1	1	0.143	+	1
carbohydrate phosphorylation (GO:0046835)	1	1	0.143	+	1
negative regulation of response to wounding (GO:1903035)	1	1	0.143	+	1
stress response to metal ion (GO:0097501)	1	1	0.143	+	1
peptide amidation (GO:0001519)	1	1	0.143	+	1
positive regulation of sequestering of triglyceride (GO:0010890)	1	1	0.143	+	1
positive regulation of nuclear-transcribed mRNA catabolic process, nonsense-mediated decay (GO:2000624)	1	1	0.143	+	1
regulation of nuclear-transcribed mRNA catabolic process, nonsense-mediated decay (GO:2000622)	1	1	0.143	+	1
positive regulation of histone H4-K16 acetylation (GO:2000620)	1	1	0.143	+	1
release of cytoplasmic sequestered NF-kappaB (GO:0008588)	1	1	0.143	+	1
mystery cell differentiation (GO:0008583)	1	1	0.143	+	1
negative regulation of histone H4-K16 acetylation (GO:2000619)	1	1	0.143	+	1
response to misfolded protein (GO:0051788)	1	1	0.143	+	1
positive regulation of pathway-restricted SMAD protein phosphorylation (GO:0010862)	1	1	0.143	+	1
adenosine to inosine editing (GO:0006382)	1	1	0.143	+	1
termination of RNA polymerase II transcription (GO:0006369)	1	1	0.143	+	1
purine nucleotide-sugar transmembrane transport (GO:0090480)	1	1	0.143	+	1
regulation of gene expression by genetic imprinting (GO:0006349)	1	1	0.143	+	1
maintenance of chromatin silencing (GO:0006344)	1	1	0.143	+	1
negative regulation of cell-substrate adhesion (GO:0010812)	1	1	0.143	+	1
early endosome to recycling endosome transport (GO:0061502)	1	1	0.143	+	1
positive regulation of peptidyl-threonine phosphorylation (GO:0010800)	1	1	0.143	+	1
miRNA loading onto RISC involved in gene silencing by miRNA (GO:0035280)	1	1	0.143	+	1
mRNA cleavage involved in gene silencing by miRNA (GO:0035279)	1	1	0.143	+	1
meiotic gene conversion (GO:0006311)	1	1	0.143	+	1
interaction with host (GO:0051701)	1	1	0.143	+	1
cadmium ion transport (GO:0015691)	1	1	0.143	+	1
plasma membrane copper ion transport (GO:0015679)	1	1	0.143	+	1
negative regulation of response to DNA damage stimulus (GO:2001021)	1	1	0.143	+	1
movement in environment of other organism involved in symbiotic interaction (GO:0052192)	1	1	0.143	+	1
viral entry into host cell (GO:0046718)	1	1	0.143	+	1
acid secretion (GO:0046717)	1	1	0.143	+	1
movement in host environment (GO:0052126)	1	1	0.143	+	1
positive regulation of NF-kappaB import into nucleus (GO:0042346)	1	1	0.143	+	1
regulation of NF-kappaB import into nucleus (GO:0042345)	1	1	0.143	+	1
regulation of fatty acid biosynthetic process (GO:0042304)	1	1	0.143	+	1
regulation of peptidyl-threonine phosphorylation (GO:0010799)	1	1	0.143	+	1
cellular oligosaccharide metabolic process (GO:0051691)	1	1	0.143	+	1
cellular response to carbon dioxide (GO:0071244)	1	1	0.143	+	1
rRNA catabolic process (GO:0016075)	1	1	0.143	+	1
basolateral protein localization (GO:0061467)	1	1	0.143	+	1
nucleotide-excision repair, DNA gap filling (GO:0006297)	1	1	0.143	+	1
regulation of light-activated channel activity (GO:0016061)	1	1	0.143	+	1
base-excision repair, AP site formation (GO:0006285)	1	1	0.143	+	1
negative regulation of histone H3-K27 trimethylation (GO:1902465)	1	1	0.143	+	1
regulation of histone H3-K27 trimethylation (GO:1902464)	1	1	0.143	+	1
deoxynucleotide transport (GO:0030302)	1	1	0.143	+	1
cellular response to misfolded protein (GO:0071218)	1	1	0.143	+	1
phagosome-lysosome fusion involved in apoptotic cell clearance (GO:0090389)	1	1	0.143	+	1
phagolysosome assembly involved in apoptotic cell clearance (GO:0090387)	1	1	0.143	+	1
phagosome maturation involved in apoptotic cell clearance (GO:0090386)	1	1	0.143	+	1
CDP-diacylglycerol biosynthetic process (GO:0016024)	1	1	0.143	+	1
negative regulation of extracellular matrix disassembly (GO:0010716)	1	1	0.143	+	1
regulation of extracellular matrix disassembly (GO:0010715)	1	1	0.143	+	1
regulation of proteasome assembly (GO:0090364)	1	1	0.143	+	1
cytokinetic cell separation (GO:0000920)	1	1	0.143	+	1
operant conditioning (GO:0035106)	1	1	0.143	+	1
auxin influx (GO:0060919)	1	1	0.143	+	1
auxin transport (GO:0060918)	1	1	0.143	+	1
female genitalia morphogenesis (GO:0048807)	1	1	0.143	+	1
imaginal disc-derived female genitalia morphogenesis (GO:0048804)	1	1	0.143	+	1
positive regulation of centrosome cycle (GO:0046607)	1	1	0.143	+	1
positive regulation of mitotic centrosome separation (GO:0046604)	1	1	0.143	+	1
entry into host (GO:0044409)	1	1	0.143	+	1
entry into host cell (GO:0030260)	1	1	0.143	+	1
negative regulation of protein neddylation (GO:2000435)	1	1	0.143	+	1
regulation of protein neddylation (GO:2000434)	1	1	0.143	+	1
ribonucleoprotein complex import into nucleus (GO:0071167)	1	1	0.143	+	1
regulation of vulval development (GO:0040028)	1	1	0.143	+	1
negative regulation of vulval development (GO:0040027)	1	1	0.143	+	1
meiotic recombination checkpoint (GO:0051598)	1	1	0.143	+	1
histone H4-K8 acetylation (GO:0043982)	1	1	0.143	+	1
positive regulation of histone H3-K4 methylation (GO:0051571)	1	1	0.143	+	1
histone H3-K18 acetylation (GO:0043971)	1	1	0.143	+	1
regulation of histone H3-K4 methylation (GO:0051569)	1	1	0.143	+	1
positive regulation of cAMP-mediated signaling (GO:0043950)	1	1	0.143	+	1
regulation of cAMP-mediated signaling (GO:0043949)	1	1	0.143	+	1
positive regulation of peptide hormone secretion (GO:0090277)	1	1	0.143	+	1
positive regulation of BMP secretion (GO:1900144)	1	1	0.143	+	1
positive regulation of cytoplasmic mRNA processing body assembly (GO:0010606)	1	1	0.143	+	1
negative regulation of histone H4 acetylation (GO:0090241)	1	1	0.143	+	1
positive regulation of histone H4 acetylation (GO:0090240)	1	1	0.143	+	1
regulation of glycolytic process (GO:0006110)	1	1	0.143	+	1
nuclear speck organization (GO:0035063)	1	1	0.143	+	1
splicing factor protein import into nucleus (GO:0035048)	1	1	0.143	+	1
protein localization to nuclear pore (GO:0090204)	1	1	0.143	+	1
negative regulation of cell junction assembly (GO:1901889)	1	1	0.143	+	1
positive regulation of protein depolymerization (GO:1901881)	1	1	0.143	+	1
ciliary receptor clustering involved in smoothened signaling pathway (GO:0060830)	1	1	0.143	+	1
proboscis morphogenesis (GO:0048734)	1	1	0.143	+	1
regulation of cholesterol transport (GO:0032374)	1	1	0.143	+	1
regulation of sterol transport (GO:0032371)	1	1	0.143	+	1
intracellular lipid transport (GO:0032365)	1	1	0.143	+	1
macrophage activation (GO:0042116)	1	1	0.143	+	1
miRNA metabolic process (GO:0010586)	1	1	0.143	+	1
regulation of Ral GTPase activity (GO:0032315)	1	1	0.143	+	1
positive regulation of synaptic vesicle exocytosis (GO:2000302)	1	1	0.143	+	1
negative regulation of synaptic vesicle exocytosis (GO:2000301)	1	1	0.143	+	1
regulation of calcium ion transport into cytosol (GO:0010522)	1	1	0.143	+	1
regulation of reciprocal meiotic recombination (GO:0010520)	1	1	0.143	+	1
DNA strand renaturation (GO:0000733)	1	1	0.143	+	1
strand displacement (GO:0000732)	1	1	0.143	+	1
negative regulation of cellular response to hypoxia (GO:1900038)	1	1	0.143	+	1
membrane fission (GO:0090148)	1	1	0.143	+	1
nucleotide-excision repair, DNA damage recognition (GO:0000715)	1	1	0.143	+	1
protection from non-homologous end joining at telomere (GO:0031848)	1	1	0.143	+	1
fructose 2,6-bisphosphate metabolic process (GO:0006003)	1	1	0.143	+	1
fructose metabolic process (GO:0006000)	1	1	0.143	+	1
cadmium ion transmembrane transport (GO:0070574)	1	1	0.143	+	1
positive regulation of neuron projection regeneration (GO:0070572)	1	1	0.143	+	1
negative regulation of neuron projection regeneration (GO:0070571)	1	1	0.143	+	1
one-carbon compound transport (GO:0019755)	1	1	0.143	+	1
regulation of cell-substrate junction assembly (GO:0090109)	1	1	0.143	+	1
negative regulation of axon regeneration (GO:0048681)	1	1	0.143	+	1
positive regulation of axon regeneration (GO:0048680)	1	1	0.143	+	1
hormone transport (GO:0009914)	1	1	0.143	+	1
circadian regulation of translation (GO:0097167)	1	1	0.143	+	1
phosphatidylglycerol metabolic process (GO:0046471)	1	1	0.143	+	1
negative regulation of pigment cell differentiation (GO:0050941)	1	1	0.143	+	1
regulation of pigment cell differentiation (GO:0050932)	1	1	0.143	+	1
sulfur compound catabolic process (GO:0044273)	1	1	0.143	+	1
regulation of multicellular organismal metabolic process (GO:0044246)	1	1	0.143	+	1
alpha-amino-3-hydroxy-5-methyl-4-isoxazole propionate selective glutamate receptor clustering (GO:0097113)	1	1	0.143	+	1
positive regulation of receptor activity (GO:2000273)	1	1	0.143	+	1
secretory granule localization (GO:0032252)	1	1	0.143	+	1
'de novo' UMP biosynthetic process (GO:0044205)	1	1	0.143	+	1
nuclear-transcribed mRNA catabolic process, exonucleolytic, 5'-3' (GO:0034428)	1	1	0.143	+	1
activation of store-operated calcium channel activity (GO:0032237)	1	1	0.143	+	1
regulation of transcription by chromatin organization (GO:0034401)	1	1	0.143	+	1
regulation of synaptic transmission, dopaminergic (GO:0032225)	1	1	0.143	+	1
positive regulation of synaptic transmission, cholinergic (GO:0032224)	1	1	0.143	+	1
negative regulation of mitotic recombination (GO:0045950)	1	1	0.143	+	1
histone H3-K36 methylation (GO:0010452)	1	1	0.143	+	1
positive regulation of oxidoreductase activity (GO:0051353)	1	1	0.143	+	1
negative regulation of exocytosis (GO:0045920)	1	1	0.143	+	1
positive regulation of microtubule nucleation (GO:0090063)	1	1	0.143	+	1
positive regulation of organelle assembly (GO:1902117)	1	1	0.143	+	1
positive regulation of antifungal peptide production (GO:0002804)	1	1	0.143	+	1
positive regulation of chromatin silencing at centromere (GO:0090053)	1	1	0.143	+	1
regulation of chromatin silencing at centromere (GO:0090052)	1	1	0.143	+	1
plus-end specific microtubule depolymerization (GO:0070462)	1	1	0.143	+	1
positive regulation of cerebellar granule cell precursor proliferation (GO:0021940)	1	1	0.143	+	1
negative regulation of compound eye retinal cell apoptotic process (GO:1901693)	1	1	0.143	+	1
smoothened signaling pathway involved in regulation of cerebellar granule cell precursor cell proliferation (GO:0021938)	1	1	0.143	+	1
cerebellar Purkinje cell-granule cell precursor cell signaling involved in regulation of granule cell precursor cell proliferation (GO:0021937)	1	1	0.143	+	1
regulation of cerebellar granule cell precursor proliferation (GO:0021936)	1	1	0.143	+	1
negative regulation of post-embryonic development (GO:0048581)	1	1	0.143	+	1
nucleotide transmembrane transport (GO:1901679)	1	1	0.143	+	1
BMP signaling pathway involved in spinal cord dorsal/ventral patterning (GO:0021919)	1	1	0.143	+	1
negative regulation of smoothened signaling pathway involved in ventral spinal cord patterning (GO:0021914)	1	1	0.143	+	1
regulation of meiosis I (GO:0060631)	1	1	0.143	+	1
carbamoyl phosphate biosynthetic process (GO:0070409)	1	1	0.143	+	1
carbamoyl phosphate metabolic process (GO:0070408)	1	1	0.143	+	1
oxidation-dependent protein catabolic process (GO:0070407)	1	1	0.143	+	1
dendritic spine maintenance (GO:0097062)	1	1	0.143	+	1
pattern orientation (GO:0007633)	1	1	0.143	+	1
regulation of chromosome condensation (GO:0060623)	1	1	0.143	+	1
CDP-diacylglycerol metabolic process (GO:0046341)	1	1	0.143	+	1
blood vessel morphogenesis (GO:0048514)	1	1	0.143	+	1
regulation of timing of cell differentiation (GO:0048505)	1	1	0.143	+	1
maintenance of actomyosin contractile ring localization (GO:0032189)	1	1	0.143	+	1
septin cytoskeleton organization (GO:0032185)	1	1	0.143	+	1
positive regulation of octopamine signaling pathway (GO:2000130)	1	1	0.143	+	1
peptide secretion (GO:0002790)	1	1	0.143	+	1
regulation of octopamine signaling pathway (GO:2000128)	1	1	0.143	+	1
positive regulation of octopamine or tyramine signaling pathway (GO:2000127)	1	1	0.143	+	1
regulation of octopamine or tyramine signaling pathway (GO:2000125)	1	1	0.143	+	1
establishment of meiotic spindle orientation (GO:0051296)	1	1	0.143	+	1
negative regulation of nematode larval development (GO:0061064)	1	1	0.143	+	1
regulation of nematode larval development (GO:0061062)	1	1	0.143	+	1
negative regulation of nurse cell apoptotic process (GO:0045849)	1	1	0.143	+	1
spindle midzone assembly involved in mitosis (GO:0051256)	1	1	0.143	+	1
polyadenylation-dependent ncRNA catabolic process (GO:0043634)	1	1	0.143	+	1
polyadenylation-dependent RNA catabolic process (GO:0043633)	1	1	0.143	+	1
ncRNA polyadenylation involved in polyadenylation-dependent ncRNA catabolic process (GO:0043630)	1	1	0.143	+	1
positive regulation of eclosion (GO:0045805)	1	1	0.143	+	1
ncRNA polyadenylation (GO:0043629)	1	1	0.143	+	1
positive regulation of production of molecular mediator of immune response (GO:0002702)	1	1	0.143	+	1
neurotransmitter-gated ion channel clustering (GO:0072578)	1	1	0.143	+	1
release of sequestered calcium ion into cytosol (GO:0051209)	1	1	0.143	+	1
multicellular organismal iron ion homeostasis (GO:0060586)	1	1	0.143	+	1
purine-containing compound transmembrane transport (GO:0072530)	1	1	0.143	+	1
negative regulation of peptide hormone processing (GO:0060570)	1	1	0.143	+	1
synaptic vesicle membrane organization (GO:0048499)	1	1	0.143	+	1
oxalate transport (GO:0019532)	1	1	0.143	+	1
regulation of peptide hormone processing (GO:0060568)	1	1	0.143	+	1
positive regulation of protein binding (GO:0032092)	1	1	0.143	+	1
cortical protein anchoring (GO:0032065)	1	1	0.143	+	1
conversion of ds siRNA to ss siRNA (GO:0036404)	1	1	0.143	+	1
cardiolipin biosynthetic process (GO:0032049)	1	1	0.143	+	1
cardiolipin metabolic process (GO:0032048)	1	1	0.143	+	1
regulation of cell-cell adhesion mediated by cadherin (GO:2000047)	1	1	0.143	+	1
positive regulation of immune effector process (GO:0002699)	1	1	0.143	+	1
positive regulation of insulin secretion (GO:0032024)	1	1	0.143	+	1
positive regulation of epidermal growth factor-activated receptor activity (GO:0045741)	1	1	0.143	+	1
positive regulation of insulin-like growth factor receptor signaling pathway (GO:0043568)	1	1	0.143	+	1
negative regulation of DNA repair (GO:0045738)	1	1	0.143	+	1
regulation of lipid kinase activity (GO:0043550)	1	1	0.143	+	1
chaperone-mediated protein complex assembly (GO:0051131)	1	1	0.143	+	1
positive regulation of neuron apoptotic process (GO:0043525)	1	1	0.143	+	1
plus-end directed microtubule sliding (GO:0031535)	1	1	0.143	+	1
UV protection (GO:0009650)	1	1	0.143	+	1
sulfur oxidation (GO:0019417)	1	1	0.143	+	1
aldehyde biosynthetic process (GO:0046184)	1	1	0.143	+	1
positive regulation of response to alcohol (GO:1901421)	1	1	0.143	+	1
calcium ion transport into cytosol (GO:0060402)	1	1	0.143	+	1
cytosolic calcium ion transport (GO:0060401)	1	1	0.143	+	1
regulation of response to alcohol (GO:1901419)	1	1	0.143	+	1
positive regulation of response to ethanol (GO:1901418)	1	1	0.143	+	1
regulation of response to ethanol (GO:1901416)	1	1	0.143	+	1
hyperosmotic response (GO:0006972)	1	1	0.143	+	1
cellular defense response (GO:0006968)	1	1	0.143	+	1
enteroendocrine cell differentiation (GO:0035883)	1	1	0.143	+	1
regulation of cellular carbohydrate catabolic process (GO:0043471)	1	1	0.143	+	1
regulation of carbohydrate catabolic process (GO:0043470)	1	1	0.143	+	1
cerebellar cortex morphogenesis (GO:0021696)	1	1	0.143	+	1
cerebellar cortex development (GO:0021695)	1	1	0.143	+	1
rubidium ion transport (GO:0035826)	1	1	0.143	+	1
gene conversion (GO:0035822)	1	1	0.143	+	1
galactose catabolic process (GO:0019388)	1	1	0.143	+	1
synaptonemal complex disassembly (GO:0070194)	1	1	0.143	+	1
regulation of cell-cell adhesion mediated by integrin (GO:0033632)	1	1	0.143	+	1
detection of virus (GO:0009597)	1	1	0.143	+	1
detection of nutrient (GO:0009594)	1	1	0.143	+	1
regulation of pathway-restricted SMAD protein phosphorylation (GO:0060393)	1	1	0.143	+	1
synapse assembly involved in innervation (GO:0060386)	1	1	0.143	+	1
clathrin coat assembly (GO:0048268)	1	1	0.143	+	1
nucleologenesis (GO:0017126)	1	1	0.143	+	1
mitochondrial iron ion transport (GO:0048250)	1	1	0.143	+	1
positive regulation of store-operated calcium channel activity (GO:1901341)	1	1	0.143	+	1
regulation of centriole-centriole cohesion (GO:0030997)	1	1	0.143	+	1
DNA rewinding (GO:0036292)	1	1	0.143	+	1
protein trans-autophosphorylation (GO:0036290)	1	1	0.143	+	1
regulation of store-operated calcium channel activity (GO:1901339)	1	1	0.143	+	1
SAGA complex assembly (GO:0036285)	1	1	0.143	+	1
GMP metabolic process (GO:0046037)	2	1	0.286	+	1
astral microtubule nucleation (GO:0030954)	2	1	0.286	+	1
negative regulation of protein phosphatase type 2A activity (GO:0034048)	2	1	0.286	+	1
Golgi to endosome transport (GO:0006895)	2	1	0.286	+	1
regulation of protein phosphatase type 2A activity (GO:0034047)	2	1	0.286	+	1
contractile ring localization (GO:0036214)	2	2	0.286	+	1
contractile ring maintenance (GO:0036212)	2	2	0.286	+	1
cell volume homeostasis (GO:0006884)	2	1	0.286	+	1
cellular zinc ion homeostasis (GO:0006882)	2	1	0.286	+	1
deadenylation-dependent decapping of nuclear-transcribed mRNA (GO:0000290)	2	1	0.286	+	1
regulation of transcription from RNA polymerase II promoter in response to DNA damage (GO:1990248)	2	1	0.286	+	1
mitochondrial fission (GO:0000266)	2	1	0.286	+	1
dorsal/ventral axon guidance (GO:0033563)	2	2	0.286	+	1
medulla oblongata development (GO:0021550)	2	1	0.286	+	1
regulation of fatty acid metabolic process (GO:0019217)	2	1	0.286	+	1
activation of JUN kinase activity (GO:0007257)	2	2	0.286	+	1
activation of JNKK activity (GO:0007256)	2	1	0.286	+	1
regulation of cell-matrix adhesion (GO:0001952)	2	2	0.286	+	1
Wnt signaling pathway, calcium modulating pathway (GO:0007223)	2	1	0.286	+	1
activation of phospholipase C activity (GO:0007202)	2	1	0.286	+	1
regulation of transcription involved in G2/M transition of mitotic cell cycle (GO:0000117)	2	1	0.286	+	1
positive regulation of lipase activity (GO:0060193)	2	1	0.286	+	1
selenium compound metabolic process (GO:0001887)	2	1	0.286	+	1
phospholipase C-activating dopamine receptor signaling pathway (GO:0060158)	2	1	0.286	+	1
neuron cell-cell adhesion (GO:0007158)	2	1	0.286	+	1
meiotic anaphase I (GO:0007133)	2	1	0.286	+	1
germ cell proliferation (GO:0036093)	2	1	0.286	+	1
synapsis (GO:0007129)	2	1	0.286	+	1
minus-end specific microtubule depolymerization (GO:0036078)	2	1	0.286	+	1
fucosylation (GO:0036065)	2	1	0.286	+	1
mitotic anaphase B (GO:0000092)	2	1	0.286	+	1
mitotic metaphase (GO:0000089)	2	1	0.286	+	1
positive regulation of compound eye photoreceptor development (GO:0045315)	2	1	0.286	+	1
regulation of I-kappaB kinase/NF-kappaB signaling (GO:0043122)	2	1	0.286	+	1
monoubiquitinated histone H2A deubiquitination (GO:0035522)	2	1	0.286	+	1
monoubiquitinated histone deubiquitination (GO:0035521)	2	1	0.286	+	1
monoubiquitinated protein deubiquitination (GO:0035520)	2	1	0.286	+	1
single strand break repair (GO:0000012)	2	2	0.286	+	1
meiotic cell cycle checkpoint (GO:0033313)	2	1	0.286	+	1
regulation of ATP catabolic process (GO:1903289)	2	1	0.286	+	1
metaphase/anaphase transition of mitotic cell cycle (GO:0007091)	2	1	0.286	+	1
positive regulation of microtubule polymerization (GO:0031116)	2	1	0.286	+	1
glucan catabolic process (GO:0009251)	2	2	0.286	+	1
dendrite regeneration (GO:0031104)	2	2	0.286	+	1
pericardium development (GO:0060039)	2	1	0.286	+	1
mediolateral intercalation (GO:0060031)	2	1	0.286	+	1
convergent extension involved in gastrulation (GO:0060027)	2	1	0.286	+	1
convergent extension (GO:0060026)	2	1	0.286	+	1
activation of Rap GTPase activity (GO:0032861)	2	1	0.286	+	1
positive regulation of calcium ion transmembrane transporter activity (GO:1901021)	2	1	0.286	+	1
ectodermal cell fate specification (GO:0001715)	2	1	0.286	+	1
regulation of calcium ion transmembrane transporter activity (GO:1901019)	2	1	0.286	+	1
spermine biosynthetic process (GO:0006597)	2	2	0.286	+	1
serotonin biosynthetic process from tryptophan (GO:0006587)	2	1	0.286	+	1
semaphorin-plexin signaling pathway (GO:0071526)	2	1	0.286	+	1
fatty acid homeostasis (GO:0055089)	2	2	0.286	+	1
positive regulation of cell cycle G2/M phase transition (GO:1902751)	2	1	0.286	+	1
calcium-dependent cell-matrix adhesion (GO:0016340)	2	1	0.286	+	1
proline catabolic process (GO:0006562)	2	1	0.286	+	1
regulation of BMP secretion (GO:2001284)	2	1	0.286	+	1
heme transport (GO:0015886)	2	2	0.286	+	1
ATP transport (GO:0015867)	2	1	0.286	+	1
ADP transport (GO:0015866)	2	1	0.286	+	1
primary miRNA processing (GO:0031053)	2	2	0.286	+	1
chromatin silencing by small RNA (GO:0031048)	2	2	0.286	+	1
metaphase/anaphase transition of cell cycle (GO:0044784)	2	1	0.286	+	1
regulation of calcium ion transmembrane transport (GO:1903169)	2	1	0.286	+	1
lipopolysaccharide biosynthetic process (GO:0009103)	2	1	0.286	+	1
regulation of monooxygenase activity (GO:0032768)	2	1	0.286	+	1
negative regulation of peptidyl-lysine acetylation (GO:2000757)	2	1	0.286	+	1
epidermal growth factor receptor ligand maturation (GO:0038004)	2	1	0.286	+	1
positive regulation of G2/M transition of mitotic cell cycle (GO:0010971)	2	1	0.286	+	1
regulation of mitotic sister chromatid separation (GO:0010965)	2	1	0.286	+	1
selenocysteine biosynthetic process (GO:0016260)	2	1	0.286	+	1
dolichol-linked oligosaccharide biosynthetic process (GO:0006488)	2	2	0.286	+	1
selenocysteine metabolic process (GO:0016259)	2	1	0.286	+	1
lipopolysaccharide metabolic process (GO:0008653)	2	1	0.286	+	1
hexose transport (GO:0008645)	2	1	0.286	+	1
positive regulation of receptor internalization (GO:0002092)	2	1	0.286	+	1
regulation of receptor internalization (GO:0002090)	2	1	0.286	+	1
regulation of translational initiation by iron (GO:0006447)	2	1	0.286	+	1
valyl-tRNA aminoacylation (GO:0006438)	2	2	0.286	+	1
tryptophanyl-tRNA aminoacylation (GO:0006436)	2	2	0.286	+	1
regulation of synapse structural plasticity (GO:0051823)	2	2	0.286	+	1
leucyl-tRNA aminoacylation (GO:0006429)	2	2	0.286	+	1
isoleucyl-tRNA aminoacylation (GO:0006428)	2	2	0.286	+	1
glutaminyl-tRNA aminoacylation (GO:0006425)	2	1	0.286	+	1
glutamyl-tRNA aminoacylation (GO:0006424)	2	1	0.286	+	1
cysteinyl-tRNA aminoacylation (GO:0006423)	2	1	0.286	+	1
aspartyl-tRNA aminoacylation (GO:0006422)	2	1	0.286	+	1
glial cell proliferation (GO:0014009)	2	1	0.286	+	1
tRNA export from nucleus (GO:0006409)	2	1	0.286	+	1
UDP-xylose transport (GO:0015790)	2	1	0.286	+	1
histone H3-K9 demethylation (GO:0033169)	2	2	0.286	+	1
positive regulation of protein import into nucleus, translocation (GO:0033160)	2	1	0.286	+	1
UDP-N-acetylglucosamine transport (GO:0015788)	2	1	0.286	+	1
UDP-glucuronic acid transport (GO:0015787)	2	1	0.286	+	1
UDP-glucose transport (GO:0015786)	2	1	0.286	+	1
UDP-galactose transport (GO:0015785)	2	1	0.286	+	1
CMP-N-acetylneuraminate transport (GO:0015782)	2	2	0.286	+	1
regulation of protein import into nucleus, translocation (GO:0033158)	2	1	0.286	+	1
glycogen catabolic process (GO:0005980)	2	2	0.286	+	1
siRNA loading onto RISC involved in chromatin silencing by small RNA (GO:0070923)	2	2	0.286	+	1
regulation of production of small RNA involved in gene silencing by RNA (GO:0070920)	2	1	0.286	+	1
positive regulation of protein dephosphorylation (GO:0035307)	2	1	0.286	+	1
positive regulation of dephosphorylation (GO:0035306)	2	1	0.286	+	1
positive regulation of hormone secretion (GO:0046887)	2	1	0.286	+	1
branched-chain amino acid catabolic process (GO:0009083)	2	2	0.286	+	1
taurine transport (GO:0015734)	2	1	0.286	+	1
aspartate family amino acid catabolic process (GO:0009068)	2	1	0.286	+	1
bicarbonate transport (GO:0015701)	2	1	0.286	+	1
positive regulation of eye photoreceptor cell development (GO:0042479)	2	1	0.286	+	1
negative regulation of protein export from nucleus (GO:0046826)	2	1	0.286	+	1
mannosylation (GO:0097502)	2	2	0.286	+	1
synaptic vesicle uncoating (GO:0016191)	2	1	0.286	+	1
regulation of histone H4-K16 acetylation (GO:2000618)	2	2	0.286	+	1
positive regulation of phospholipase C activity (GO:0010863)	2	1	0.286	+	1
cellular response to monosaccharide stimulus (GO:0071326)	2	1	0.286	+	1
DNA-templated transcription, termination (GO:0006353)	2	1	0.286	+	1
negative regulation of mitochondrion organization (GO:0010823)	2	1	0.286	+	1
regulation of cell-substrate adhesion (GO:0010810)	2	2	0.286	+	1
DNA replication-independent nucleosome assembly (GO:0006336)	2	1	0.286	+	1
regulation of calcineurin-NFAT signaling cascade (GO:0070884)	2	1	0.286	+	1
apoptotic DNA fragmentation (GO:0006309)	2	1	0.286	+	1
protein O-linked mannosylation (GO:0035269)	2	2	0.286	+	1
protein mannosylation (GO:0035268)	2	2	0.286	+	1
double-strand break repair via single-strand annealing (GO:0045002)	2	2	0.286	+	1
regulation of mitotic sister chromatid segregation (GO:0033047)	2	1	0.286	+	1
basement membrane assembly (GO:0070831)	2	2	0.286	+	1
positive regulation of ion transmembrane transport (GO:0034767)	2	1	0.286	+	1
positive regulation of transmembrane transport (GO:0034764)	2	1	0.286	+	1
positive regulation of iron ion transmembrane transport (GO:0034761)	2	1	0.286	+	1
regulation of iron ion transmembrane transport (GO:0034759)	2	1	0.286	+	1
positive regulation of iron ion transport (GO:0034758)	2	1	0.286	+	1
regulation of iron ion transport (GO:0034756)	2	1	0.286	+	1
DNA replication-independent nucleosome organization (GO:0034724)	2	1	0.286	+	1
protein N-linked glycosylation via asparagine (GO:0018279)	2	1	0.286	+	1
regulation of multivesicular body size involved in endosome transport (GO:0010797)	2	1	0.286	+	1
nucleotide-excision repair, DNA incision, 5'-to lesion (GO:0006296)	2	1	0.286	+	1
establishment of Golgi localization (GO:0051683)	2	2	0.286	+	1
cholesterol transport (GO:0030301)	2	1	0.286	+	1
regulation of phospholipase C activity (GO:1900274)	2	1	0.286	+	1
DNA replication, synthesis of RNA primer (GO:0006269)	2	1	0.286	+	1
DNA unwinding involved in DNA replication (GO:0006268)	2	1	0.286	+	1
maintenance of nucleus location (GO:0051658)	2	1	0.286	+	1
maintenance of organelle location (GO:0051657)	2	1	0.286	+	1
phagosome-lysosome fusion (GO:0090385)	2	1	0.286	+	1
Golgi localization (GO:0051645)	2	2	0.286	+	1
negative regulation of protein acetylation (GO:1901984)	2	1	0.286	+	1
sensory neuron axon guidance (GO:0097374)	2	1	0.286	+	1
regulation of cell proliferation involved in compound eye morphogenesis (GO:2000495)	2	1	0.286	+	1
ncRNA catabolic process (GO:0034661)	2	2	0.286	+	1
regulation of Ral protein signal transduction (GO:0032485)	2	2	0.286	+	1
endoplasmic reticulum calcium ion homeostasis (GO:0032469)	2	1	0.286	+	1
peptidyl-asparagine modification (GO:0018196)	2	1	0.286	+	1
apoptotic nuclear changes (GO:0030262)	2	1	0.286	+	1
regulation of cytokinesis, actomyosin contractile ring assembly (GO:2000431)	2	2	0.286	+	1
histone H4-K12 acetylation (GO:0043983)	2	1	0.286	+	1
dormancy process (GO:0022611)	2	1	0.286	+	1
histone H3-K27 acetylation (GO:0043974)	2	1	0.286	+	1
GMP biosynthetic process (GO:0006177)	2	1	0.286	+	1
histone H2A acetylation (GO:0043968)	2	1	0.286	+	1
negative regulation of mitochondrial fusion (GO:0010637)	2	1	0.286	+	1
positive regulation of mitochondrial fusion (GO:0010636)	2	1	0.286	+	1
mRNA export from nucleus in response to heat stress (GO:0031990)	2	2	0.286	+	1
regulation of peptide hormone secretion (GO:0090276)	2	1	0.286	+	1
regulation of cell proliferation involved in imaginal disc-derived wing morphogenesis (GO:0090256)	2	1	0.286	+	1
glycerophosphate shuttle (GO:0006127)	2	1	0.286	+	1
positive regulation of histone H3-K9 trimethylation (GO:1900114)	2	1	0.286	+	1
regulation of histone H3-K9 trimethylation (GO:1900112)	2	1	0.286	+	1
negative regulation of histone acetylation (GO:0035067)	2	1	0.286	+	1
regulation of triglyceride metabolic process (GO:0090207)	2	1	0.286	+	1
regulation of cell junction assembly (GO:1901888)	2	2	0.286	+	1
positive regulation of Rac protein signal transduction (GO:0035022)	2	1	0.286	+	1
regulation of centriole replication (GO:0046599)	2	2	0.286	+	1
positive regulation of viral entry into host cell (GO:0046598)	2	1	0.286	+	1
regulation of viral entry into host cell (GO:0046596)	2	1	0.286	+	1
skeletal muscle fiber development (GO:0048741)	2	1	0.286	+	1
sodium-dependent phosphate transport (GO:0044341)	2	1	0.286	+	1
positive regulation of clathrin-mediated endocytosis (GO:2000370)	2	2	0.286	+	1
negative regulation of hormone biosynthetic process (GO:0032353)	2	1	0.286	+	1
positive regulation of stress fiber assembly (GO:0051496)	2	1	0.286	+	1
semaphorin-plexin signaling pathway involved in regulation of photoreceptor cell axon guidance (GO:2000305)	2	1	0.286	+	1
regulation of double-strand break repair via homologous recombination (GO:0010569)	2	1	0.286	+	1
acetyl-CoA biosynthetic process from pyruvate (GO:0006086)	2	2	0.286	+	1
myotube cell development (GO:0014904)	2	1	0.286	+	1
maintenance of protein location in nucleus (GO:0051457)	2	1	0.286	+	1
myoblast migration (GO:0051451)	2	1	0.286	+	1
positive regulation of phospholipase activity (GO:0010518)	2	1	0.286	+	1
regulation of phospholipase activity (GO:0010517)	2	1	0.286	+	1
spermine metabolic process (GO:0008215)	2	2	0.286	+	1
achiasmate meiosis I (GO:0000705)	2	1	0.286	+	1
regulation of neuron projection regeneration (GO:0070570)	2	2	0.286	+	1
cargo loading into COPII-coated vesicle (GO:0090110)	2	2	0.286	+	1
detection of mechanical stimulus involved in sensory perception of touch (GO:0050976)	2	1	0.286	+	1
regulation of axon regeneration (GO:0048679)	2	2	0.286	+	1
phosphatidic acid metabolic process (GO:0046473)	2	1	0.286	+	1
phosphatidylcholine metabolic process (GO:0046470)	2	1	0.286	+	1
pericardium morphogenesis (GO:0003344)	2	1	0.286	+	1
maintenance of oocyte nucleus location involved in oocyte dorsal/ventral axis specification (GO:0042070)	2	1	0.286	+	1
positive regulation of extracellular matrix constituent secretion (GO:0003331)	2	1	0.286	+	1
regulation of extracellular matrix constituent secretion (GO:0003330)	2	1	0.286	+	1
oocyte morphogenesis (GO:0048601)	2	1	0.286	+	1
long-term strengthening of neuromuscular junction (GO:0042062)	2	2	0.286	+	1
negative regulation of reproductive process (GO:2000242)	2	1	0.286	+	1
positive regulation of actin filament bundle assembly (GO:0032233)	2	1	0.286	+	1
regulation of synaptic transmission, cholinergic (GO:0032222)	2	1	0.286	+	1
parallel actin filament bundle assembly (GO:0030046)	2	1	0.286	+	1
exit from mitosis (GO:0010458)	2	1	0.286	+	1
regulation of oxidoreductase activity (GO:0051341)	2	1	0.286	+	1
negative regulation of biosynthetic process of antibacterial peptides active against Gram-negative bacteria (GO:0002814)	2	1	0.286	+	1
neuroendocrine cell differentiation (GO:0061101)	2	1	0.286	+	1
regulation of trehalose metabolic process (GO:0090062)	2	1	0.286	+	1
negative regulation of antibacterial peptide biosynthetic process (GO:0002809)	2	1	0.286	+	1
negative regulation of antimicrobial peptide biosynthetic process (GO:0002806)	2	1	0.286	+	1
chromosome movement towards spindle pole (GO:0051305)	2	1	0.286	+	1
regulation of compound eye retinal cell apoptotic process (GO:1901692)	2	1	0.286	+	1
iron coordination entity transport (GO:1901678)	2	2	0.286	+	1
grooming behavior (GO:0007625)	2	1	0.286	+	1
protein localization to cell surface (GO:0034394)	2	1	0.286	+	1
positive regulation of viral process (GO:0048524)	2	1	0.286	+	1
actomyosin contractile ring localization (GO:0032187)	2	2	0.286	+	1
energy homeostasis (GO:0097009)	2	2	0.286	+	1
regulation of ubiquitin-specific protease activity (GO:2000152)	2	2	0.286	+	1
positive regulation of protein tyrosine kinase activity (GO:0061098)	2	1	0.286	+	1
negative regulation of histone H3-K27 methylation (GO:0061086)	2	2	0.286	+	1
positive regulation of peptide secretion (GO:0002793)	2	1	0.286	+	1
retrograde axon cargo transport (GO:0008090)	2	1	0.286	+	1
antifungal peptide production (GO:0002781)	2	1	0.286	+	1
establishment of meiotic spindle localization (GO:0051295)	2	2	0.286	+	1
protein homotetramerization (GO:0051289)	2	2	0.286	+	1
positive regulation of pole plasm oskar mRNA localization (GO:0045856)	2	2	0.286	+	1
negative regulation of meiosis (GO:0045835)	2	2	0.286	+	1
regulation of transcription from RNA polymerase II promoter in response to stress (GO:0043618)	2	1	0.286	+	1
protein destabilization (GO:0031648)	2	1	0.286	+	1
regulation of insulin secretion (GO:0050796)	2	1	0.286	+	1
retrograde synaptic vesicle transport (GO:0048491)	2	1	0.286	+	1
anterograde synaptic vesicle transport (GO:0048490)	2	1	0.286	+	1
neuroepithelial cell differentiation (GO:0060563)	2	1	0.286	+	1
negative regulation of dendrite morphogenesis (GO:0050774)	2	1	0.286	+	1
response to auxin (GO:0009733)	2	1	0.286	+	1
response to camptothecin (GO:1901563)	2	1	0.286	+	1
positive regulation of peptidyl-tyrosine phosphorylation (GO:0050731)	2	1	0.286	+	1
regulation of digestive system process (GO:0044058)	2	1	0.286	+	1
regulation of Wnt signaling pathway, planar cell polarity pathway (GO:2000095)	2	1	0.286	+	1
negative regulation of cellular amide metabolic process (GO:0034249)	2	1	0.286	+	1
regulation of non-canonical Wnt signaling pathway (GO:2000050)	2	1	0.286	+	1
regulation of planar cell polarity pathway involved in axis elongation (GO:2000040)	2	1	0.286	+	1
negative regulation of chromatin assembly or disassembly (GO:0045798)	2	1	0.286	+	1
regulation of insulin-like growth factor receptor signaling pathway (GO:0043567)	2	1	0.286	+	1
response to UV-B (GO:0010224)	2	1	0.286	+	1
actomyosin contractile ring maintenance (GO:0031566)	2	2	0.286	+	1
DNA ligation involved in DNA repair (GO:0051103)	2	1	0.286	+	1
extracellular matrix constituent secretion (GO:0070278)	2	1	0.286	+	1
tryptophan catabolic process to kynurenine (GO:0019441)	2	1	0.286	+	1
endosomal lumen acidification (GO:0048388)	2	1	0.286	+	1
negative regulation of epithelial cell proliferation (GO:0050680)	2	1	0.286	+	1
storage protein import into fat body (GO:0015032)	2	1	0.286	+	1
response to symbiotic bacterium (GO:0009609)	2	1	0.286	+	1
glycerol-3-phosphate biosynthetic process (GO:0046167)	2	1	0.286	+	1
ER overload response (GO:0006983)	2	2	0.286	+	1
alpha-tubulin acetylation (GO:0071929)	2	1	0.286	+	1
substrate-dependent cell migration, cell extension (GO:0006930)	2	1	0.286	+	1
chaperone mediated protein folding requiring cofactor (GO:0051085)	2	1	0.286	+	1
'de novo' posttranslational protein folding (GO:0051084)	2	1	0.286	+	1
substrate-dependent cell migration (GO:0006929)	2	1	0.286	+	1
cellular component disassembly involved in execution phase of apoptosis (GO:0006921)	2	1	0.286	+	1
alternative mRNA splicing, via spliceosome (GO:0000380)	2	1	0.286	+	1
phagocytosis, recognition (GO:0006910)	2	1	0.286	+	1
regulation of ATPase activity (GO:0043462)	2	1	0.286	+	1
nucleotide-excision repair, DNA incision (GO:0033683)	2	1	0.286	+	1
tRNA transport (GO:0051031)	2	1	0.286	+	1
negative regulation of heterochromatin assembly (GO:0031452)	2	1	0.286	+	1
negative regulation of mRNA 3'-end processing (GO:0031441)	2	1	0.286	+	1
innervation (GO:0060384)	2	1	0.286	+	1
positive regulation of Golgi to plasma membrane protein transport (GO:0042998)	2	1	0.286	+	1
vesicle uncoating (GO:0072319)	2	1	0.286	+	1
amyloid precursor protein metabolic process (GO:0042982)	2	1	0.286	+	1
thiamine pyrophosphate transport (GO:0030974)	2	1	0.286	+	1
UMP metabolic process (GO:0046049)	3	1	0.4289	+	1
multivesicular body organization (GO:0036257)	3	1	0.4289	+	1
regulation of vesicle targeting, to, from or within Golgi (GO:0048209)	3	1	0.4289	+	1
hindbrain development (GO:0030902)	3	2	0.4289	+	1
regulation of protein binding (GO:0043393)	3	1	0.4289	+	1
Rac protein signal transduction (GO:0016601)	3	2	0.4289	+	1
positive regulation of DNA binding (GO:0043388)	3	2	0.4289	+	1
polysaccharide catabolic process (GO:0000272)	3	2	0.4289	+	1
response to carbon dioxide (GO:0010037)	3	1	0.4289	+	1
immune response-regulating cell surface receptor signaling pathway involved in phagocytosis (GO:0002433)	3	1	0.4289	+	1
positive regulation of vesicle fusion (GO:0031340)	3	1	0.4289	+	1
negative regulation of RNA polymerase II transcriptional preinitiation complex assembly (GO:0017055)	3	1	0.4289	+	1
NAD biosynthetic process (GO:0009435)	3	1	0.4289	+	1
I-kappaB phosphorylation (GO:0007252)	3	2	0.4289	+	1
integrin-mediated signaling pathway (GO:0007229)	3	1	0.4289	+	1
cuticle hydrocarbon biosynthetic process (GO:0006723)	3	1	0.4289	+	1
activation of MAPKK activity (GO:0000186)	3	1	0.4289	+	1
proteasome assembly (GO:0043248)	3	1	0.4289	+	1
signal maturation (GO:0035638)	3	1	0.4289	+	1
negative regulation of epidermal growth factor-activated receptor activity (GO:0007175)	3	1	0.4289	+	1
negative regulation of developmental pigmentation (GO:0048086)	3	1	0.4289	+	1
positive regulation of cuticle pigmentation (GO:0048081)	3	1	0.4289	+	1
primary amino compound biosynthetic process (GO:1901162)	3	1	0.4289	+	1
phagolysosome assembly (GO:0001845)	3	1	0.4289	+	1
anatomical structure maturation (GO:0071695)	3	2	0.4289	+	1
regulation of cytokinetic process (GO:0032954)	3	2	0.4289	+	1
activin receptor signaling pathway (GO:0032924)	3	2	0.4289	+	1
male germline ring canal formation (GO:0030726)	3	1	0.4289	+	1
sphingomyelin catabolic process (GO:0006685)	3	1	0.4289	+	1
dosage compensation complex assembly involved in dosage compensation by hyperactivation of X chromosome (GO:0016457)	3	3	0.4289	+	1
border follicle cell delamination (GO:0030709)	3	2	0.4289	+	1
glycosylceramide metabolic process (GO:0006677)	3	1	0.4289	+	1
triglyceride mobilization (GO:0006642)	3	1	0.4289	+	1
positive regulation of synaptic vesicle transport (GO:1902805)	3	1	0.4289	+	1
regulation of chromatin binding (GO:0035561)	3	1	0.4289	+	1
protein import into nucleus, translocation (GO:0000060)	3	1	0.4289	+	1
protein import into nucleus, docking (GO:0000059)	3	2	0.4289	+	1
receptor clustering (GO:0043113)	3	2	0.4289	+	1
viral life cycle (GO:0019058)	3	1	0.4289	+	1
regulation of microtubule polymerization (GO:0031113)	3	2	0.4289	+	1
positive regulation of microtubule polymerization or depolymerization (GO:0031112)	3	2	0.4289	+	1
negative regulation of compound eye cone cell fate specification (GO:0042683)	3	2	0.4289	+	1
regulation of polysaccharide metabolic process (GO:0032881)	3	1	0.4289	+	1
positive regulation of DNA endoreduplication (GO:0032877)	3	1	0.4289	+	1
mitotic G1/S transition checkpoint (GO:0044819)	3	1	0.4289	+	1
microtubule depolymerization (GO:0007019)	3	2	0.4289	+	1
positive regulation of Rap GTPase activity (GO:0032854)	3	2	0.4289	+	1
positive regulation of Rab GTPase activity (GO:0032851)	3	2	0.4289	+	1
ectodermal cell fate commitment (GO:0001712)	3	1	0.4289	+	1
inner mitochondrial membrane organization (GO:0007007)	3	1	0.4289	+	1
ectoderm formation (GO:0001705)	3	1	0.4289	+	1
valine metabolic process (GO:0006573)	3	1	0.4289	+	1
tryptophan catabolic process (GO:0006569)	3	1	0.4289	+	1
endoplasmic reticulum membrane fusion (GO:0016320)	3	1	0.4289	+	1
positive regulation of Cdc42 GTPase activity (GO:0043089)	3	2	0.4289	+	1
regulation of Cdc42 GTPase activity (GO:0043088)	3	2	0.4289	+	1
misfolded or incompletely synthesized protein catabolic process (GO:0006515)	3	2	0.4289	+	1
cargo loading into vesicle (GO:0035459)	3	3	0.4289	+	1
copper ion transmembrane transport (GO:0035434)	3	1	0.4289	+	1
store-operated calcium entry (GO:0002115)	3	1	0.4289	+	1
maintenance of neuroblast polarity (GO:0045201)	3	1	0.4289	+	1
negative regulation of histone methylation (GO:0031061)	3	2	0.4289	+	1
pre-miRNA processing (GO:0031054)	3	3	0.4289	+	1
peptide transport (GO:0015833)	3	1	0.4289	+	1
leucine transport (GO:0015820)	3	1	0.4289	+	1
G1 DNA damage checkpoint (GO:0044783)	3	1	0.4289	+	1
purine ribonucleoside monophosphate catabolic process (GO:0009169)	3	1	0.4289	+	1
positive phototaxis (GO:0046956)	3	2	0.4289	+	1
fatty-acyl-CoA biosynthetic process (GO:0046949)	3	1	0.4289	+	1
branched-chain amino acid transport (GO:0015803)	3	1	0.4289	+	1
conditioned taste aversion (GO:0001661)	3	1	0.4289	+	1
purine nucleoside monophosphate catabolic process (GO:0009128)	3	1	0.4289	+	1
regulation of double-strand break repair (GO:2000779)	3	2	0.4289	+	1
positive regulation of peptidyl-lysine acetylation (GO:2000758)	3	1	0.4289	+	1
cellular response to osmotic stress (GO:0071470)	3	1	0.4289	+	1
attachment of GPI anchor to protein (GO:0016255)	3	2	0.4289	+	1
negative regulation of phosphatidylinositol 3-kinase signaling (GO:0014067)	3	2	0.4289	+	1
regulation of phosphatidylinositol 3-kinase signaling (GO:0014066)	3	2	0.4289	+	1
C-terminal protein amino acid modification (GO:0018410)	3	1	0.4289	+	1
ether lipid biosynthetic process (GO:0008611)	3	1	0.4289	+	1
arginyl-tRNA aminoacylation (GO:0006420)	3	1	0.4289	+	1
alanyl-tRNA aminoacylation (GO:0006419)	3	1	0.4289	+	1
regulation of cellular response to oxidative stress (GO:1900407)	3	1	0.4289	+	1
pyrimidine nucleotide-sugar transport (GO:0015781)	3	2	0.4289	+	1
RNA phosphodiester bond hydrolysis (GO:0090501)	3	1	0.4289	+	1
nucleotide-sugar transport (GO:0015780)	3	2	0.4289	+	1
fatty-acyl-CoA metabolic process (GO:0035337)	3	1	0.4289	+	1
positive regulation of hippo signaling (GO:0035332)	3	1	0.4289	+	1
maintenance of imaginal disc-derived wing hair orientation (GO:0035321)	3	2	0.4289	+	1
wing cell fate specification (GO:0035311)	3	2	0.4289	+	1
alpha-ketoglutarate transport (GO:0015742)	3	1	0.4289	+	1
cortical actin cytoskeleton stabilization (GO:0033109)	3	1	0.4289	+	1
oocyte maturation (GO:0001556)	3	1	0.4289	+	1
oocyte growth (GO:0001555)	3	1	0.4289	+	1
regulation of protein export from nucleus (GO:0046825)	3	1	0.4289	+	1
serotonin biosynthetic process (GO:0042427)	3	1	0.4289	+	1
regulation of sequestering of triglyceride (GO:0010889)	3	1	0.4289	+	1
negative regulation of lipid storage (GO:0010888)	3	1	0.4289	+	1
rhabdomere morphogenesis (GO:0061541)	3	1	0.4289	+	1
regulation of glycogen metabolic process (GO:0070873)	3	1	0.4289	+	1
peptidyl-arginine omega-N-methylation (GO:0035247)	3	1	0.4289	+	1
peptidyl-arginine N-methylation (GO:0035246)	3	1	0.4289	+	1
copper ion import (GO:0015677)	3	1	0.4289	+	1
regulation of sister chromatid segregation (GO:0033045)	3	1	0.4289	+	1
regulation of response to drug (GO:2001023)	3	2	0.4289	+	1
basement membrane disassembly (GO:0034769)	3	1	0.4289	+	1
positive energy taxis (GO:0052128)	3	2	0.4289	+	1
histone H3-K4 demethylation (GO:0034720)	3	2	0.4289	+	1
regulation of multivesicular body size (GO:0010796)	3	1	0.4289	+	1
negative regulation of phosphoprotein phosphatase activity (GO:0032515)	3	1	0.4289	+	1
synaptic vesicle targeting (GO:0016080)	3	2	0.4289	+	1
stabilization of membrane potential (GO:0030322)	3	2	0.4289	+	1
DNA ligation (GO:0006266)	3	2	0.4289	+	1
peptidyl-arginine methylation (GO:0018216)	3	1	0.4289	+	1
viral process (GO:0016032)	3	1	0.4289	+	1
phagosome maturation (GO:0090382)	3	1	0.4289	+	1
endoplasmic reticulum localization (GO:0051643)	3	2	0.4289	+	1
nuclear axial expansion (GO:0035191)	3	1	0.4289	+	1
UMP biosynthetic process (GO:0006222)	3	1	0.4289	+	1
ATP catabolic process (GO:0006200)	3	1	0.4289	+	1
positive regulation of protein acetylation (GO:1901985)	3	1	0.4289	+	1
histone H3-K27 methylation (GO:0070734)	3	1	0.4289	+	1
peptidyl-arginine methylation, to asymmetrical-dimethyl arginine (GO:0019919)	3	1	0.4289	+	1
cellular lipid biosynthetic process (GO:0097384)	3	1	0.4289	+	1
response to copper ion (GO:0046688)	3	1	0.4289	+	1
positive regulation of insulin receptor signaling pathway (GO:0046628)	3	1	0.4289	+	1
regulation of mitotic centrosome separation (GO:0046602)	3	2	0.4289	+	1
regulation of cytokinesis (GO:0032465)	3	2	0.4289	+	1
interspecies interaction between organisms (GO:0044419)	3	1	0.4289	+	1
symbiosis, encompassing mutualism through parasitism (GO:0044403)	3	1	0.4289	+	1
cellular protein complex localization (GO:0034629)	3	1	0.4289	+	1
peptidyl-arginine modification (GO:0018195)	3	1	0.4289	+	1
ribonucleoprotein complex localization (GO:0071166)	3	1	0.4289	+	1
positive regulation of ion transmembrane transporter activity (GO:0032414)	3	1	0.4289	+	1
male sex determination (GO:0030238)	3	1	0.4289	+	1
positive regulation of transporter activity (GO:0032411)	3	1	0.4289	+	1
response to calcium ion (GO:0051592)	3	1	0.4289	+	1
chitin-based cuticle attachment to epithelium (GO:0040005)	3	1	0.4289	+	1
ectodermal cell differentiation (GO:0010668)	3	1	0.4289	+	1
BMP signaling pathway involved in Malpighian tubule cell chemotaxis (GO:0061353)	3	1	0.4289	+	1
cell chemotaxis involved in Malpighian tubule morphogenesis (GO:0061352)	3	1	0.4289	+	1
extracellular matrix disassembly (GO:0022617)	3	1	0.4289	+	1
positive regulation of histone H3-K9 methylation (GO:0051574)	3	1	0.4289	+	1
regulation of histone H3-K9 methylation (GO:0051570)	3	1	0.4289	+	1
histone H3-K9 acetylation (GO:0043970)	3	2	0.4289	+	1
regulation of bicoid mRNA localization (GO:0008359)	3	1	0.4289	+	1
cell rearrangement involved in Malpighian tubule morphogenesis (GO:0061334)	3	1	0.4289	+	1
adenine nucleotide transport (GO:0051503)	3	2	0.4289	+	1
regulation of histone H4 acetylation (GO:0090239)	3	2	0.4289	+	1
positive regulation of histone acetylation (GO:0035066)	3	1	0.4289	+	1
Wnt signaling pathway involved in dorsal/ventral axis specification (GO:0044332)	3	1	0.4289	+	1
glycerol ether biosynthetic process (GO:0046504)	3	1	0.4289	+	1
regulation of lipid transport (GO:0032368)	3	2	0.4289	+	1
regulation of COPII vesicle coating (GO:0003400)	3	1	0.4289	+	1
regulation of clathrin-mediated endocytosis (GO:2000369)	3	3	0.4289	+	1
negative regulation of hormone metabolic process (GO:0032351)	3	2	0.4289	+	1
centromere complex assembly (GO:0034508)	3	1	0.4289	+	1
spermidine biosynthetic process (GO:0008295)	3	2	0.4289	+	1
regulation of Rap GTPase activity (GO:0032317)	3	2	0.4289	+	1
regulation of Rac GTPase activity (GO:0032314)	3	2	0.4289	+	1
regulation of synaptic vesicle exocytosis (GO:2000300)	3	2	0.4289	+	1
regulation of cellular ketone metabolic process (GO:0010565)	3	1	0.4289	+	1
nuclear RNA surveillance (GO:0071027)	3	3	0.4289	+	1
negative regulation of transposition, RNA-mediated (GO:0010526)	3	1	0.4289	+	1
regulation of transposition, RNA-mediated (GO:0010525)	3	1	0.4289	+	1
microtubule cytoskeleton organization involved in establishment of planar polarity (GO:0090176)	3	1	0.4289	+	1
cuticle chitin biosynthetic process (GO:0006035)	3	1	0.4289	+	1
DNA synthesis involved in DNA repair (GO:0000731)	3	2	0.4289	+	1
regulation of cellular response to hypoxia (GO:1900037)	3	1	0.4289	+	1
DNA double-strand break processing (GO:0000729)	3	1	0.4289	+	1
meiotic mismatch repair (GO:0000710)	3	3	0.4289	+	1
meiotic DNA double-strand break processing (GO:0000706)	3	1	0.4289	+	1
regulation of ER to Golgi vesicle-mediated transport by GTP hydrolysis (GO:0090113)	3	1	0.4289	+	1
regulation of isoprenoid metabolic process (GO:0019747)	3	1	0.4289	+	1
histone H3-K36 demethylation (GO:0070544)	3	2	0.4289	+	1
sprouting of injured axon (GO:0048682)	3	1	0.4289	+	1
execution phase of apoptosis (GO:0097194)	3	1	0.4289	+	1
collateral sprouting of injured axon (GO:0048674)	3	1	0.4289	+	1
collateral sprouting (GO:0048668)	3	1	0.4289	+	1
ether lipid metabolic process (GO:0046485)	3	1	0.4289	+	1
glycosphingolipid catabolic process (GO:0046479)	3	1	0.4289	+	1
glycosylceramide catabolic process (GO:0046477)	3	1	0.4289	+	1
detection of calcium ion (GO:0005513)	3	1	0.4289	+	1
cellular polysaccharide catabolic process (GO:0044247)	3	2	0.4289	+	1
negative regulation of receptor activity (GO:2000272)	3	1	0.4289	+	1
positive regulation of mitotic cell cycle, embryonic (GO:0045977)	3	1	0.4289	+	1
kinetochore assembly (GO:0051382)	3	1	0.4289	+	1
muscle cell migration (GO:0014812)	3	1	0.4289	+	1
regulation of peptide transport (GO:0090087)	3	1	0.4289	+	1
positive regulation of exocytosis (GO:0045921)	3	1	0.4289	+	1
positive regulation of ribosome biogenesis (GO:0090070)	3	1	0.4289	+	1
regulation of ribosome biogenesis (GO:0090069)	3	1	0.4289	+	1
metaphase (GO:0051323)	3	1	0.4289	+	1
attachment of spindle microtubules to kinetochore involved in mitotic sister chromatid segregation (GO:0051315)	3	1	0.4289	+	1
positive regulation of establishment of protein localization to plasma membrane (GO:0090004)	3	2	0.4289	+	1
regulation of calcium-mediated signaling (GO:0050848)	3	1	0.4289	+	1
diacylglycerol metabolic process (GO:0046339)	3	1	0.4289	+	1
circadian sleep/wake cycle, sleep (GO:0050802)	3	1	0.4289	+	1
regulation of RNA polymerase II transcriptional preinitiation complex assembly (GO:0045898)	3	1	0.4289	+	1
regulation of peptide secretion (GO:0002791)	3	1	0.4289	+	1
negative regulation of peptidoglycan recognition protein signaling pathway (GO:0061060)	3	1	0.4289	+	1
positive regulation of DNA-dependent DNA replication (GO:2000105)	3	1	0.4289	+	1
negative regulation of sequestering of calcium ion (GO:0051283)	3	1	0.4289	+	1
establishment of blood-nerve barrier (GO:0008065)	3	2	0.4289	+	1
protein tetramerization (GO:0051262)	3	2	0.4289	+	1
receptor internalization (GO:0031623)	3	2	0.4289	+	1
regulation of juvenile hormone biosynthetic process (GO:0007557)	3	1	0.4289	+	1
regulation of juvenile hormone metabolic process (GO:0007556)	3	1	0.4289	+	1
regulation of phagocytosis (GO:0050764)	3	1	0.4289	+	1
ether biosynthetic process (GO:1901503)	3	1	0.4289	+	1
indolalkylamine catabolic process (GO:0046218)	3	1	0.4289	+	1
regulation of DNA methylation (GO:0044030)	3	1	0.4289	+	1
DNA hypermethylation (GO:0044026)	3	1	0.4289	+	1
ciliary basal body organization (GO:0032053)	3	1	0.4289	+	1
negative regulation of Toll signaling pathway (GO:0045751)	3	1	0.4289	+	1
maintenance of DNA repeat elements (GO:0043570)	3	3	0.4289	+	1
intra-S DNA damage checkpoint (GO:0031573)	3	2	0.4289	+	1
mitotic G1 DNA damage checkpoint (GO:0031571)	3	1	0.4289	+	1
regulation of actin nucleation (GO:0051125)	3	1	0.4289	+	1
positive regulation of JUN kinase activity (GO:0043507)	3	3	0.4289	+	1
protein complex localization (GO:0031503)	3	1	0.4289	+	1
regulation of epithelial cell proliferation (GO:0050678)	3	2	0.4289	+	1
glycerol-3-phosphate catabolic process (GO:0046168)	3	1	0.4289	+	1
regulation of mRNA stability (GO:0043488)	3	1	0.4289	+	1
microtubule sliding (GO:0051012)	3	2	0.4289	+	1
nerve maturation (GO:0021682)	3	2	0.4289	+	1
regulation of lipoprotein lipase activity (GO:0051004)	3	1	0.4289	+	1
glycolipid catabolic process (GO:0019377)	3	1	0.4289	+	1
regulation of cell adhesion mediated by integrin (GO:0033628)	3	2	0.4289	+	1
leucine import (GO:0060356)	3	1	0.4289	+	1
interstrand cross-link repair (GO:0036297)	3	3	0.4289	+	1
plasma membrane to endosome transport (GO:0048227)	4	1	0.5719	+	1
astral microtubule organization (GO:0030953)	4	2	0.5719	+	1
regulation of transcription from RNA polymerase II promoter, mitotic (GO:0046021)	4	3	0.5719	+	1
positive regulation of oskar mRNA translation (GO:0046012)	4	1	0.5719	+	1
endosomal vesicle fusion (GO:0034058)	4	1	0.5719	+	1
production of molecular mediator of immune response (GO:0002440)	4	2	0.5719	+	1
intraciliary retrograde transport (GO:0035721)	4	1	0.5719	+	1
ovarian follicle cell-cell adhesion (GO:0007299)	4	1	0.5719	+	1
spermatid nucleus elongation (GO:0007290)	4	1	0.5719	+	1
intrinsic apoptotic signaling pathway in response to endoplasmic reticulum stress (GO:0070059)	4	1	0.5719	+	1
pole cell fate determination (GO:0007278)	4	1	0.5719	+	1
transmission of nerve impulse (GO:0019226)	4	2	0.5719	+	1
amide transport (GO:0042886)	4	2	0.5719	+	1
positive regulation of nuclear-transcribed mRNA poly(A) tail shortening (GO:0060213)	4	1	0.5719	+	1
vitamin B6 biosynthetic process (GO:0042819)	4	1	0.5719	+	1
vitamin B6 metabolic process (GO:0042816)	4	1	0.5719	+	1
nucleosome positioning (GO:0016584)	4	2	0.5719	+	1
protein autoprocessing (GO:0016540)	4	2	0.5719	+	1
positive regulation of ion transport (GO:0043270)	4	1	0.5719	+	1
endothelial cell differentiation (GO:0045446)	4	2	0.5719	+	1
positive regulation of protein complex disassembly (GO:0043243)	4	1	0.5719	+	1
multicellular organismal signaling (GO:0035637)	4	2	0.5719	+	1
phospholipid catabolic process (GO:0009395)	4	2	0.5719	+	1
endothelial cell development (GO:0001885)	4	2	0.5719	+	1
anterior/posterior lineage restriction, imaginal disc (GO:0048099)	4	1	0.5719	+	1
snRNA transcription from RNA polymerase III promoter (GO:0042796)	4	1	0.5719	+	1
regulation of epidermal growth factor-activated receptor activity (GO:0007176)	4	2	0.5719	+	1
positive regulation of developmental pigmentation (GO:0048087)	4	1	0.5719	+	1
intrinsic apoptotic signaling pathway in response to DNA damage by p53 class mediator (GO:0042771)	4	1	0.5719	+	1
primary amino compound metabolic process (GO:1901160)	4	1	0.5719	+	1
cleavage furrow ingression (GO:0036090)	4	1	0.5719	+	1
negative regulation of mRNA splicing, via spliceosome (GO:0048025)	4	1	0.5719	+	1
striated muscle myosin thick filament assembly (GO:0071688)	4	1	0.5719	+	1
inositol lipid-mediated signaling (GO:0048017)	4	2	0.5719	+	1
phosphatidylinositol-mediated signaling (GO:0048015)	4	2	0.5719	+	1
dosage compensation complex assembly (GO:0042714)	4	3	0.5719	+	1
filtration diaphragm assembly (GO:0036058)	4	1	0.5719	+	1
circadian regulation of gene expression (GO:0032922)	4	2	0.5719	+	1
regulation of response to oxidative stress (GO:1902882)	4	1	0.5719	+	1
spectrosome organization (GO:0030721)	4	2	0.5719	+	1
P granule organization (GO:0030719)	4	1	0.5719	+	1
glycosphingolipid biosynthetic process (GO:0006688)	4	1	0.5719	+	1
mitotic anaphase A (GO:0000091)	4	3	0.5719	+	1
secretory granule organization (GO:0033363)	4	3	0.5719	+	1
rhabdomere membrane biogenesis (GO:0045313)	4	2	0.5719	+	1
regulation of postsynaptic membrane potential (GO:0060078)	4	1	0.5719	+	1
glucan biosynthetic process (GO:0009250)	4	4	0.5719	+	1
axon regeneration (GO:0031103)	4	1	0.5719	+	1
negative regulation of transcription from RNA polymerase II promoter during mitosis (GO:0007070)	4	3	0.5719	+	1
negative regulation of transcription during mitosis (GO:0007068)	4	3	0.5719	+	1
spindle assembly involved in female meiosis II (GO:0007058)	4	3	0.5719	+	1
spindle assembly involved in female meiosis I (GO:0007057)	4	1	0.5719	+	1
vacuolar acidification (GO:0007035)	4	3	0.5719	+	1
activation of Rac GTPase activity (GO:0032863)	4	3	0.5719	+	1
activation of Rho GTPase activity (GO:0032862)	4	3	0.5719	+	1
tubulin complex assembly (GO:0007021)	4	1	0.5719	+	1
cholesterol homeostasis (GO:0042632)	4	1	0.5719	+	1
zinc ion transmembrane transport (GO:0071577)	4	1	0.5719	+	1
inositol phosphate catabolic process (GO:0071545)	4	2	0.5719	+	1
mRNA cis splicing, via spliceosome (GO:0045292)	4	1	0.5719	+	1
leucine metabolic process (GO:0006551)	4	3	0.5719	+	1
protein monoubiquitination (GO:0006513)	4	2	0.5719	+	1
establishment of neuroblast polarity (GO:0045200)	4	1	0.5719	+	1
purine ribonucleotide transport (GO:0015868)	4	2	0.5719	+	1
purine nucleotide transport (GO:0015865)	4	2	0.5719	+	1
negative regulation of response to gamma radiation (GO:2001229)	4	1	0.5719	+	1
regulation of response to gamma radiation (GO:2001228)	4	1	0.5719	+	1
pyrimidine ribonucleoside monophosphate biosynthetic process (GO:0009174)	4	1	0.5719	+	1
pyrimidine ribonucleoside monophosphate metabolic process (GO:0009173)	4	1	0.5719	+	1
ribonucleoside monophosphate catabolic process (GO:0009158)	4	1	0.5719	+	1
multi-organism cellular process (GO:0044764)	4	1	0.5719	+	1
nucleoside monophosphate catabolic process (GO:0009125)	4	1	0.5719	+	1
negative regulation of DNA-templated transcription, elongation (GO:0032785)	4	3	0.5719	+	1
benzene-containing compound metabolic process (GO:0042537)	4	1	0.5719	+	1
O-glycan processing (GO:0016266)	4	2	0.5719	+	1
maintenance of epithelial cell apical/basal polarity (GO:0045199)	4	1	0.5719	+	1
pyridoxine biosynthetic process (GO:0008615)	4	1	0.5719	+	1
pyridoxine metabolic process (GO:0008614)	4	1	0.5719	+	1
regulation of glucose metabolic process (GO:0010906)	4	1	0.5719	+	1
azole transport (GO:0045117)	4	1	0.5719	+	1
imaginal disc-derived wing hair site selection (GO:0035320)	4	1	0.5719	+	1
trehalose biosynthetic process (GO:0005992)	4	1	0.5719	+	1
glycogen biosynthetic process (GO:0005978)	4	4	0.5719	+	1
regulation of hormone biosynthetic process (GO:0046885)	4	2	0.5719	+	1
regulation of hormone secretion (GO:0046883)	4	1	0.5719	+	1
inositol phosphate dephosphorylation (GO:0046855)	4	2	0.5719	+	1
micropyle formation (GO:0046844)	4	1	0.5719	+	1
regulation of extracellular matrix organization (GO:1903053)	4	2	0.5719	+	1
phosphorylated carbohydrate dephosphorylation (GO:0046838)	4	2	0.5719	+	1
fatty acid alpha-oxidation (GO:0001561)	4	1	0.5719	+	1
regulation of transmembrane transporter activity (GO:0022898)	4	2	0.5719	+	1
indole-containing compound catabolic process (GO:0042436)	4	1	0.5719	+	1
serotonin metabolic process (GO:0042428)	4	1	0.5719	+	1
cellular response to ethanol (GO:0071361)	4	1	0.5719	+	1
positive regulation of lipid storage (GO:0010884)	4	2	0.5719	+	1
protein geranylgeranylation (GO:0018344)	4	2	0.5719	+	1
cellular response to carbohydrate stimulus (GO:0071322)	4	1	0.5719	+	1
glycoside catabolic process (GO:0016139)	4	1	0.5719	+	1
glycoside metabolic process (GO:0016137)	4	1	0.5719	+	1
chromatin silencing at telomere (GO:0006348)	4	1	0.5719	+	1
negative regulation of viral genome replication (GO:0045071)	4	2	0.5719	+	1
regulation of viral genome replication (GO:0045069)	4	2	0.5719	+	1
positive regulation of protein exit from endoplasmic reticulum (GO:0070863)	4	1	0.5719	+	1
early endosome to late endosome transport (GO:0045022)	4	1	0.5719	+	1
tracheal pit formation in open tracheal system (GO:0035202)	4	1	0.5719	+	1
negative regulation of cell migration (GO:0030336)	4	2	0.5719	+	1
DNA duplex unwinding (GO:0032508)	4	3	0.5719	+	1
cellular response to amino acid stimulus (GO:0071230)	4	1	0.5719	+	1
adaptation of rhodopsin mediated signaling (GO:0016062)	4	1	0.5719	+	1
lagging strand elongation (GO:0006273)	4	3	0.5719	+	1
cellular response to biotic stimulus (GO:0071216)	4	2	0.5719	+	1
translesion synthesis (GO:0019985)	4	4	0.5719	+	1
dendritic spine morphogenesis (GO:0060997)	4	1	0.5719	+	1
dendritic spine development (GO:0060996)	4	1	0.5719	+	1
sterol regulatory element binding protein cleavage (GO:0035103)	4	1	0.5719	+	1
regulation of axon extension involved in axon guidance (GO:0048841)	4	1	0.5719	+	1
notum morphogenesis (GO:0048802)	4	1	0.5719	+	1
regulation of Cdc42 protein signal transduction (GO:0032489)	4	2	0.5719	+	1
regulation of Rap protein signal transduction (GO:0032487)	4	2	0.5719	+	1
skeletal muscle myosin thick filament assembly (GO:0030241)	4	1	0.5719	+	1
positive regulation of locomotion (GO:0040017)	4	1	0.5719	+	1
embryonic cleavage (GO:0040016)	4	1	0.5719	+	1
negative regulation of locomotion (GO:0040013)	4	2	0.5719	+	1
regulation of ion transmembrane transporter activity (GO:0032412)	4	2	0.5719	+	1
regulation of transporter activity (GO:0032409)	4	2	0.5719	+	1
histone H4-K16 acetylation (GO:0043984)	4	2	0.5719	+	1
establishment of proximal/distal cell polarity (GO:0022606)	4	1	0.5719	+	1
negative regulation of antimicrobial humoral response (GO:0008348)	4	1	0.5719	+	1
regulation of cytoplasmic mRNA processing body assembly (GO:0010603)	4	3	0.5719	+	1
female germline ring canal formation, actin assembly (GO:0008302)	4	2	0.5719	+	1
siRNA loading onto RISC involved in RNA interference (GO:0035087)	4	2	0.5719	+	1
fertilization, exchange of chromosomal proteins (GO:0035042)	4	3	0.5719	+	1
sperm chromatin decondensation (GO:0035041)	4	3	0.5719	+	1
adaptation of signaling pathway (GO:0023058)	4	1	0.5719	+	1
positive regulation of transcription of nuclear large rRNA transcript from RNA polymerase I promoter (GO:1901838)	4	1	0.5719	+	1
DNA geometric change (GO:0032392)	4	3	0.5719	+	1
protein polyglutamylation (GO:0018095)	4	1	0.5719	+	1
acetyl-CoA biosynthetic process (GO:0006085)	4	2	0.5719	+	1
RNA surveillance (GO:0071025)	4	3	0.5719	+	1
positive regulation of cellular response to insulin stimulus (GO:1900078)	4	2	0.5719	+	1
positive regulation of neuromuscular synaptic transmission (GO:1900075)	4	1	0.5719	+	1
spermidine metabolic process (GO:0008216)	4	2	0.5719	+	1
DNA catabolic process, endonucleolytic (GO:0000737)	4	2	0.5719	+	1
establishment of epithelial cell planar polarity (GO:0090163)	4	1	0.5719	+	1
cholesterol metabolic process (GO:0008203)	4	1	0.5719	+	1
galactose metabolic process (GO:0006012)	4	3	0.5719	+	1
COPII-coated vesicle budding (GO:0090114)	4	2	0.5719	+	1
cellular carbohydrate catabolic process (GO:0044275)	4	2	0.5719	+	1
microtubule anchoring at centrosome (GO:0034454)	4	3	0.5719	+	1
regulation of receptor activity (GO:0010469)	4	2	0.5719	+	1
cytoplasmic mRNA processing body assembly (GO:0033962)	4	1	0.5719	+	1
negative regulation of DNA recombination (GO:0045910)	4	3	0.5719	+	1
tubulin complex biogenesis (GO:0072668)	4	1	0.5719	+	1
regulation of ER to Golgi vesicle-mediated transport (GO:0060628)	4	1	0.5719	+	1
disaccharide biosynthetic process (GO:0046351)	4	1	0.5719	+	1
negative regulation of viral process (GO:0048525)	4	2	0.5719	+	1
negative regulation of cell motility (GO:2000146)	4	2	0.5719	+	1
negative regulation of protein tyrosine kinase activity (GO:0061099)	4	2	0.5719	+	1
regulation of transcription during mitosis (GO:0045896)	4	3	0.5719	+	1
regulation of histone H3-K27 methylation (GO:0061085)	4	2	0.5719	+	1
anterograde axon cargo transport (GO:0008089)	4	2	0.5719	+	1
temperature compensation of the circadian clock (GO:0010378)	4	1	0.5719	+	1
antimicrobial peptide production (GO:0002775)	4	2	0.5719	+	1
regulation of sequestering of calcium ion (GO:0051282)	4	1	0.5719	+	1
post-translational protein modification (GO:0043687)	4	2	0.5719	+	1
regulation of peptidoglycan recognition protein signaling pathway (GO:0061058)	4	1	0.5719	+	1
negative regulation of cellular component movement (GO:0051271)	4	2	0.5719	+	1
mitochondrial fusion (GO:0008053)	4	1	0.5719	+	1
spindle midzone assembly (GO:0051255)	4	1	0.5719	+	1
maintenance of RNA location (GO:0051237)	4	1	0.5719	+	1
maintenance of protein localization in organelle (GO:0072595)	4	1	0.5719	+	1
regulation of DNA-templated transcription in response to stress (GO:0043620)	4	2	0.5719	+	1
membrane biogenesis (GO:0044091)	4	2	0.5719	+	1
endothelium development (GO:0003158)	4	2	0.5719	+	1
response to monosaccharide (GO:0034284)	4	1	0.5719	+	1
negative regulation of transcription elongation from RNA polymerase II promoter (GO:0034244)	4	3	0.5719	+	1
positive regulation of chromatin assembly or disassembly (GO:0045799)	4	2	0.5719	+	1
positive regulation of G-protein coupled receptor protein signaling pathway (GO:0045745)	4	1	0.5719	+	1
positive regulation of DNA replication (GO:0045740)	4	2	0.5719	+	1
negative regulation of JUN kinase activity (GO:0043508)	4	1	0.5719	+	1
anterior midgut development (GO:0007496)	4	1	0.5719	+	1
positive regulation of mRNA processing (GO:0050685)	4	1	0.5719	+	1
heparan sulfate proteoglycan biosynthetic process, polysaccharide chain biosynthetic process (GO:0015014)	4	2	0.5719	+	1
light adaption (GO:0036367)	4	1	0.5719	+	1
intracellular distribution of mitochondria (GO:0048312)	4	3	0.5719	+	1
cellular response to virus (GO:0098586)	4	1	0.5719	+	1
positive regulation of binding (GO:0051099)	4	3	0.5719	+	1
regulation of RNA stability (GO:0043487)	4	2	0.5719	+	1
regulation of generation of precursor metabolites and energy (GO:0043467)	4	2	0.5719	+	1
vesicle targeting (GO:0006903)	4	2	0.5719	+	1
negative regulation of secretion (GO:0051048)	4	1	0.5719	+	1
negative regulation of sequence-specific DNA binding transcription factor activity (GO:0043433)	4	1	0.5719	+	1
microtubule anchoring at microtubule organizing center (GO:0072393)	4	3	0.5719	+	1
rRNA transport (GO:0051029)	4	1	0.5719	+	1
synaptonemal complex organization (GO:0070193)	4	1	0.5719	+	1
positive regulation of heterochromatin assembly (GO:0031453)	4	2	0.5719	+	1
kynurenine metabolic process (GO:0070189)	4	1	0.5719	+	1
positive regulation of mRNA 3'-end processing (GO:0031442)	4	1	0.5719	+	1
dorsal closure, spreading of leading edge cells (GO:0007395)	4	1	0.5719	+	1
intrinsic apoptotic signaling pathway by p53 class mediator (GO:0072332)	4	1	0.5719	+	1
cytoplasmic sequestering of transcription factor (GO:0042994)	4	2	0.5719	+	1
negative regulation of transcription factor import into nucleus (GO:0042992)	4	2	0.5719	+	1
anterior midgut invagination (GO:0007375)	4	1	0.5719	+	1
regulation of cell diameter (GO:0060305)	4	2	0.5719	+	1
purine nucleoside bisphosphate biosynthetic process (GO:0034033)	5	1	0.7149	+	1
ribonucleoside bisphosphate biosynthetic process (GO:0034030)	5	1	0.7149	+	1
cellular copper ion homeostasis (GO:0006878)	5	2	0.7149	+	1
eye pigment precursor transport (GO:0006856)	5	1	0.7149	+	1
primary spermatocyte growth (GO:0007285)	5	1	0.7149	+	1
regulation of transcription initiation from RNA polymerase II promoter (GO:0060260)	5	1	0.7149	+	1
positive regulation of glial cell proliferation (GO:0060252)	5	1	0.7149	+	1
germ-line stem-cell niche homeostasis (GO:0060250)	5	1	0.7149	+	1
regulation of short-term neuronal synaptic plasticity (GO:0048172)	5	1	0.7149	+	1
I-kappaB kinase/NF-kappaB signaling (GO:0007249)	5	3	0.7149	+	1
vasculature development (GO:0001944)	5	1	0.7149	+	1
positive regulation of hh target transcription factor activity (GO:0007228)	5	3	0.7149	+	1
signal transduction downstream of smoothened (GO:0007227)	5	3	0.7149	+	1
regulation of nuclear-transcribed mRNA poly(A) tail shortening (GO:0060211)	5	2	0.7149	+	1
regulation of epithelial cell differentiation (GO:0030856)	5	1	0.7149	+	1
histone deacetylation (GO:0016575)	5	1	0.7149	+	1
regulation of R8 cell spacing in compound eye (GO:0045468)	5	1	0.7149	+	1
R8 cell development (GO:0045463)	5	1	0.7149	+	1
response to amino acid (GO:0043200)	5	1	0.7149	+	1
folic acid-containing compound biosynthetic process (GO:0009396)	5	1	0.7149	+	1
regulation of lipase activity (GO:0060191)	5	2	0.7149	+	1
snRNA transcription from RNA polymerase II promoter (GO:0042795)	5	2	0.7149	+	1
adult chitin-containing cuticle pigmentation (GO:0048085)	5	1	0.7149	+	1
positive regulation of posttranscriptional gene silencing (GO:0060148)	5	2	0.7149	+	1
regulation of posttranscriptional gene silencing (GO:0060147)	5	2	0.7149	+	1
negative regulation of protein modification by small protein conjugation or removal (GO:1903321)	5	1	0.7149	+	1
positive regulation of mRNA metabolic process (GO:1903313)	5	2	0.7149	+	1
mitotic centrosome separation (GO:0007100)	5	2	0.7149	+	1
sequestering of triglyceride (GO:0030730)	5	1	0.7149	+	1
sphingomyelin metabolic process (GO:0006684)	5	2	0.7149	+	1
protein targeting to lysosome (GO:0006622)	5	2	0.7149	+	1
meiotic spindle stabilization (GO:0043147)	5	2	0.7149	+	1
mitotic DNA replication checkpoint (GO:0033314)	5	4	0.7149	+	1
coenzyme A biosynthetic process (GO:0015937)	5	1	0.7149	+	1
synapse maturation (GO:0060074)	5	3	0.7149	+	1
regulation of compound eye cone cell fate specification (GO:0042682)	5	2	0.7149	+	1
glucosamine-containing compound biosynthetic process (GO:1901073)	5	1	0.7149	+	1
neuron migration (GO:0001764)	5	2	0.7149	+	1
regulation of DNA endoreduplication (GO:0032875)	5	1	0.7149	+	1
nucleolus organization (GO:0007000)	5	2	0.7149	+	1
polyamine biosynthetic process (GO:0006596)	5	2	0.7149	+	1
regulation of chromosome segregation (GO:0051983)	5	2	0.7149	+	1
sterol homeostasis (GO:0055092)	5	1	0.7149	+	1
establishment or maintenance of polarity of larval imaginal disc epithelium (GO:0016336)	5	2	0.7149	+	1
zinc ion homeostasis (GO:0055069)	5	3	0.7149	+	1
positive regulation of histone methylation (GO:0031062)	5	2	0.7149	+	1
negative regulation of histone modification (GO:0031057)	5	2	0.7149	+	1
pyrimidine nucleoside monophosphate biosynthetic process (GO:0009130)	5	1	0.7149	+	1
pyrimidine nucleoside monophosphate metabolic process (GO:0009129)	5	1	0.7149	+	1
Cajal body organization (GO:0030576)	5	2	0.7149	+	1
cellular response to superoxide (GO:0071451)	5	1	0.7149	+	1
cellular response to oxygen radical (GO:0071450)	5	1	0.7149	+	1
positive regulation of BMP signaling pathway (GO:0030513)	5	1	0.7149	+	1
negative regulation of macroautophagy (GO:0016242)	5	1	0.7149	+	1
positive regulation of gliogenesis (GO:0014015)	5	1	0.7149	+	1
actin filament reorganization (GO:0090527)	5	2	0.7149	+	1
negative regulation of hippo signaling (GO:0035331)	5	1	0.7149	+	1
morphogenesis of an epithelial sheet (GO:0002011)	5	1	0.7149	+	1
negative regulation of protein dephosphorylation (GO:0035308)	5	1	0.7149	+	1
negative regulation of dephosphorylation (GO:0035305)	5	1	0.7149	+	1
monosaccharide transport (GO:0015749)	5	1	0.7149	+	1
malate transport (GO:0015743)	5	1	0.7149	+	1
indole-containing compound biosynthetic process (GO:0042435)	5	1	0.7149	+	1
positive regulation of gene silencing by miRNA (GO:2000637)	5	2	0.7149	+	1
targeting of mRNA for destruction involved in RNA interference (GO:0030423)	5	3	0.7149	+	1
regulation of centrosome duplication (GO:0010824)	5	3	0.7149	+	1
regulation of protein exit from endoplasmic reticulum (GO:0070861)	5	1	0.7149	+	1
organic cation transport (GO:0015695)	5	1	0.7149	+	1
metarhodopsin inactivation (GO:0016060)	5	2	0.7149	+	1
regulation of DNA repair (GO:0006282)	5	2	0.7149	+	1
mitochondrial DNA replication (GO:0006264)	5	1	0.7149	+	1
peptidyl-glutamic acid modification (GO:0018200)	5	1	0.7149	+	1
lamellocyte differentiation (GO:0035171)	5	1	0.7149	+	1
regulation of gene silencing by miRNA (GO:0060964)	5	2	0.7149	+	1
amnioserosa maintenance (GO:0046665)	5	1	0.7149	+	1
membrane tubulation (GO:0097320)	5	3	0.7149	+	1
regulation of mitochondrial fusion (GO:0010635)	5	2	0.7149	+	1
female germline ring canal stabilization (GO:0008335)	5	4	0.7149	+	1
regulation of nuclear-transcribed mRNA catabolic process, deadenylation-dependent decay (GO:1900151)	5	2	0.7149	+	1
cell elongation involved in imaginal disc-derived wing morphogenesis (GO:0090254)	5	1	0.7149	+	1
pupation (GO:0035074)	5	1	0.7149	+	1
positive regulation of multi-organism process (GO:0043902)	5	1	0.7149	+	1
male pronucleus assembly (GO:0035039)	5	4	0.7149	+	1
regulation of transcription of nuclear large rRNA transcript from RNA polymerase I promoter (GO:1901836)	5	1	0.7149	+	1
epidermis morphogenesis (GO:0048730)	5	1	0.7149	+	1
ceramide catabolic process (GO:0046514)	5	1	0.7149	+	1
regulation of stress fiber assembly (GO:0051492)	5	2	0.7149	+	1
positive regulation of cytosolic calcium ion concentration involved in phospholipase C-activating G-protein coupled signaling pathway (GO:0051482)	5	1	0.7149	+	1
negative regulation of humoral immune response (GO:0002921)	5	1	0.7149	+	1
karyogamy (GO:0000741)	5	1	0.7149	+	1
chitin biosynthetic process (GO:0006031)	5	1	0.7149	+	1
polarity specification of anterior/posterior axis (GO:0009949)	5	2	0.7149	+	1
response to axon injury (GO:0048678)	5	1	0.7149	+	1
apical constriction involved in gastrulation (GO:0003384)	5	3	0.7149	+	1
epithelial cell morphogenesis involved in gastrulation (GO:0003381)	5	3	0.7149	+	1
regulation of photoreceptor cell axon guidance (GO:2000289)	5	1	0.7149	+	1
actin filament depolymerization (GO:0030042)	5	2	0.7149	+	1
negative regulation of nucleotide metabolic process (GO:0045980)	5	1	0.7149	+	1
actin filament reorganization involved in cell cycle (GO:0030037)	5	2	0.7149	+	1
positive regulation of transcription from RNA polymerase I promoter (GO:0045943)	5	1	0.7149	+	1
regulation of biosynthetic process of antibacterial peptides active against Gram-positive bacteria (GO:0002816)	5	1	0.7149	+	1
mitotic sister chromatid separation (GO:0051306)	5	2	0.7149	+	1
dendritic spine organization (GO:0097061)	5	2	0.7149	+	1
phototransduction, UV (GO:0007604)	5	1	0.7149	+	1
regulation of DNA-templated transcription, initiation (GO:2000142)	5	1	0.7149	+	1
negative regulation of response to nutrient levels (GO:0032108)	5	1	0.7149	+	1
negative regulation of response to extracellular stimulus (GO:0032105)	5	1	0.7149	+	1
positive regulation of nurse cell apoptotic process (GO:0045850)	5	1	0.7149	+	1
nucleoside bisphosphate biosynthetic process (GO:0033866)	5	1	0.7149	+	1
positive regulation of mRNA catabolic process (GO:0061014)	5	2	0.7149	+	1
cytoplasmic sequestering of protein (GO:0051220)	5	3	0.7149	+	1
clathrin-mediated endocytosis (GO:0072583)	5	4	0.7149	+	1
regulation of eclosion (GO:0007563)	5	2	0.7149	+	1
digestive tract mesoderm development (GO:0007502)	5	1	0.7149	+	1
mesodermal cell fate determination (GO:0007500)	5	1	0.7149	+	1
mitochondrial DNA metabolic process (GO:0032042)	5	1	0.7149	+	1
negative regulation of TOR signaling (GO:0032007)	5	1	0.7149	+	1
skin morphogenesis (GO:0043589)	5	1	0.7149	+	1
positive regulation of fibroblast growth factor receptor signaling pathway (GO:0045743)	5	2	0.7149	+	1
mitochondrion degradation (GO:0000422)	5	2	0.7149	+	1
removal of superoxide radicals (GO:0019430)	5	1	0.7149	+	1
polyol catabolic process (GO:0046174)	5	2	0.7149	+	1
cellular response to amino acid starvation (GO:0034198)	5	3	0.7149	+	1
positive regulation of biosynthetic process of antibacterial peptides active against Gram-positive bacteria (GO:0006965)	5	1	0.7149	+	1
positive regulation of DNA metabolic process (GO:0051054)	5	2	0.7149	+	1
response to oxygen radical (GO:0000305)	5	1	0.7149	+	1
response to superoxide (GO:0000303)	5	1	0.7149	+	1
signal transduction by p53 class mediator (GO:0072331)	5	1	0.7149	+	1
regulation of Golgi to plasma membrane protein transport (GO:0042996)	5	2	0.7149	+	1
posterior midgut invagination (GO:0007374)	5	2	0.7149	+	1
pentose metabolic process (GO:0019321)	5	1	0.7149	+	1
regulation of syncytial blastoderm mitotic cell cycle (GO:0007348)	5	2	0.7149	+	1
pronuclear fusion (GO:0007344)	5	1	0.7149	+	1
response to transition metal nanoparticle (GO:1990267)	6	1	0.8579	+	1
zinc ion transport (GO:0006829)	6	2	0.8579	+	1
superoxide metabolic process (GO:0006801)	6	2	0.8579	+	1
histone lysine demethylation (GO:0070076)	6	5	0.8579	+	1
ensheathment of neurons (GO:0007272)	6	2	0.8579	+	1
negative regulation of glial cell proliferation (GO:0060253)	6	2	0.8579	+	1
dopamine receptor signaling pathway (GO:0007212)	6	1	0.8579	+	1
ubiquinone biosynthetic process (GO:0006744)	6	1	0.8579	+	1
ubiquinone metabolic process (GO:0006743)	6	1	0.8579	+	1
specification of axis polarity (GO:0065001)	6	2	0.8579	+	1
adenylate cyclase-inhibiting G-protein coupled receptor signaling pathway (GO:0007193)	6	1	0.8579	+	1
regulation of syncytium formation by plasma membrane fusion (GO:0060142)	6	1	0.8579	+	1
female meiosis II (GO:0007147)	6	3	0.8579	+	1
embryonic epithelial tube formation (GO:0001838)	6	1	0.8579	+	1
amine catabolic process (GO:0009310)	6	1	0.8579	+	1
negative regulation of mRNA metabolic process (GO:1903312)	6	2	0.8579	+	1
snRNA transcription (GO:0009301)	6	2	0.8579	+	1
SREBP signaling pathway (GO:0032933)	6	2	0.8579	+	1
protein targeting to vacuole (GO:0006623)	6	3	0.8579	+	1
mitotic spindle stabilization (GO:0043148)	6	2	0.8579	+	1
autophagic vacuole assembly (GO:0000045)	6	3	0.8579	+	1
equator specification (GO:0045317)	6	1	0.8579	+	1
regulation of DNA recombination (GO:0000018)	6	4	0.8579	+	1
coenzyme A metabolic process (GO:0015936)	6	1	0.8579	+	1
deoxyribonucleotide metabolic process (GO:0009262)	6	1	0.8579	+	1
guanosine-containing compound biosynthetic process (GO:1901070)	6	1	0.8579	+	1
spindle assembly involved in male meiosis (GO:0007053)	6	1	0.8579	+	1
reflex (GO:0060004)	6	1	0.8579	+	1
mitochondrial membrane organization (GO:0007006)	6	2	0.8579	+	1
distributive segregation (GO:0032837)	6	2	0.8579	+	1
polyamine metabolic process (GO:0006595)	6	2	0.8579	+	1
mitochondrion transport along microtubule (GO:0047497)	6	4	0.8579	+	1
cellular response to sterol depletion (GO:0071501)	6	2	0.8579	+	1
glutamate biosynthetic process (GO:0006537)	6	2	0.8579	+	1
nucleoside transport (GO:0015858)	6	3	0.8579	+	1
myosin filament assembly (GO:0031034)	6	2	0.8579	+	1
myosin filament organization (GO:0031033)	6	2	0.8579	+	1
habituation (GO:0046959)	6	1	0.8579	+	1
L-glutamate transport (GO:0015813)	6	2	0.8579	+	1
meiotic cell cycle phase transition (GO:0044771)	6	1	0.8579	+	1
behavioral response to starvation (GO:0042595)	6	1	0.8579	+	1
long-chain fatty acid metabolic process (GO:0001676)	6	2	0.8579	+	1
nuclear body organization (GO:0030575)	6	3	0.8579	+	1
female genitalia development (GO:0030540)	6	1	0.8579	+	1
protein deacetylation (GO:0006476)	6	1	0.8579	+	1
signal peptide processing (GO:0006465)	6	1	0.8579	+	1
negative regulation of phosphatase activity (GO:0010923)	6	1	0.8579	+	1
attachment of spindle microtubules to kinetochore (GO:0008608)	6	1	0.8579	+	1
negative regulation of gliogenesis (GO:0014014)	6	2	0.8579	+	1
translational termination (GO:0006415)	6	2	0.8579	+	1
regulation of sodium ion transport (GO:0002028)	6	1	0.8579	+	1
small RNA loading onto RISC (GO:0070922)	6	4	0.8579	+	1
regulation of lipid biosynthetic process (GO:0046890)	6	3	0.8579	+	1
regulation of protein localization to plasma membrane (GO:1903076)	6	3	0.8579	+	1
cellular biogenic amine catabolic process (GO:0042402)	6	1	0.8579	+	1
single-organism membrane budding (GO:1902591)	6	2	0.8579	+	1
transcription from mitochondrial promoter (GO:0006390)	6	1	0.8579	+	1
protein prenylation (GO:0018342)	6	2	0.8579	+	1
transcription elongation from RNA polymerase II promoter (GO:0006368)	6	2	0.8579	+	1
transcription from RNA polymerase I promoter (GO:0006360)	6	2	0.8579	+	1
regulation of myotube differentiation (GO:0010830)	6	1	0.8579	+	1
double-strand break repair via nonhomologous end joining (GO:0006303)	6	4	0.8579	+	1
double-strand break repair via synthesis-dependent strand annealing (GO:0045003)	6	3	0.8579	+	1
negative regulation of hemocyte proliferation (GO:0035207)	6	2	0.8579	+	1
positive regulation of retrograde axon cargo transport (GO:2001019)	6	1	0.8579	+	1
regulation of retrograde axon cargo transport (GO:2001017)	6	1	0.8579	+	1
water-soluble vitamin biosynthetic process (GO:0042364)	6	1	0.8579	+	1
cellular response to cadmium ion (GO:0071276)	6	2	0.8579	+	1
cellular response to metal ion (GO:0071248)	6	2	0.8579	+	1
cellular response to arsenic-containing substance (GO:0071243)	6	2	0.8579	+	1
establishment of mitochondrion localization (GO:0051654)	6	4	0.8579	+	1
peptidyl-serine modification (GO:0018209)	6	3	0.8579	+	1
syncytial nuclear migration (GO:0035190)	6	1	0.8579	+	1
'de novo' pyrimidine nucleobase biosynthetic process (GO:0006207)	6	2	0.8579	+	1
regulation of DNA-dependent DNA replication (GO:0090329)	6	1	0.8579	+	1
cAMP-mediated signaling (GO:0019933)	6	1	0.8579	+	1
prenylation (GO:0097354)	6	2	0.8579	+	1
[truncated: 2,103 more rows]

## Sheet: GO_cluster4a
Term	Background frequency	Sample frequency	Expected	+/-	P-value
[truncated: 2,719 more rows]

[truncated: 4 more sheets: GO_cluster4b, GO_cluster5a, GO_cluster5b, GO_cluster6]
