# Supplementary material for: A large-scale, in vivo transcription factor screen defines bivalent chromatin as a key property of regulatory factors mediating Drosophila wing development
Source: HighWire-hosted journal article supplement (doi:10.1101/gr.181305.114), 2015-01-07
Supplement: Supplemental_Tables_and_Figures.docx [file Supplemental_Tables_and_Figures.docx]

**Legends for Supplemental Tables and Figures**

**A large-scale, *in vivo* transcription factor screen defines bivalent chromatin as a key property of regulatory factors mediating *Drosophila* wing development**

Claus Schertel1,***,** Monica Albarca2,***,** Claudia Rockel-Bauer1, Nicholas W. Kelley3, Johannes Bischof1, Korneel Hens2, 4, Erik van Nimwegen3,**, Konrad Basler1,**, Bart Deplancke2,**

*equal contribution

**corresponding authors

Affiliations:

1Institute of Molecular Life Sciences, University of Zurich, Switzerland

2Laboratory of Systems Biology and Genetics, Institute of Bioengineering, School of Life Sciences, Ecole Polytechnique Fédérale de Lausanne and Swiss Institute of Bioinformatics, Lausanne, Switzerland

3Biozentrum, University of Basel and Swiss Institute of Bioinformatics, Basel, Switzerland

4current address: Centre for Neural Circuits and Behavior, University of Oxford, United Kingdom

Correspondence: [erik.vannimwegen@unibas.ch](mailto:erik.vannimwegen@unibas.ch),

[konrad.basler@imls.uzh.ch](mailto:konrad.basler@imls.uzh.ch)

[bart.deplancke@epfl.ch](mailto:bart.deplancke@epfl.ch)

**Running Title:** Bivalently marked TFs regulate wing development

**Key words**: Drosophila / transcription factor / chromatin / bivalent histone marks

**Legends for Supplemental Tables**

**Supplemental Table S1: (Sheet 1)** Complete list of TF transgenes and accompanying phenotypes in the wing (misexpression and RNAi knock-down). Location in any of the six chromatin clusters is indicated. TF loci that are enriched for both activating and repressive chromatin marks in clusters 4 and 5 are indicated with 4b and 5b, respectively. **(Sheet 2)** TF genes that were only tested by RNAi. **(Sheet 3)** Previously uncharacterized TFs that induced misexpression or RNAi phenotypes. **(Sheet 4)** Phenotypes induced by TFs after induction at 18°C that caused lethality at 25°C.

**Supplemental Table S2:** Complete list of genes in clusters 4a, 4b, 5a, and 5b.

**Supplemental Table S3:** GO enrichment for each of the chromatin clusters. Analysis was performed using the AmiGO 2 algorithm (http://amigo2.geneontology.org/amigo)

**Legends for Supplemental Figures**

**Supplemental Figure S1: Validation of transgene expression** (**A, B**) qRT-PCR for the indicated target genes following misexpression of *dl* (A) and *brk* (B) in wing discs. Data shows one representative experiment (three technical replicates, error bars indicate standard deviation), normalized to three housekeeping genes (*actin*, *tubulin* and *GAPDH*). As expected, expression of *dorsal* (*dl*) induced *reaper* (p-value:4.8e-6, t-test), while repressing *hid* (Meyer et al., 2014), and expression of *brinker* (*brk)* repressed its target *omb* (p-value:9.6e-6)*.* (**C**) qRT-PCR after anti-HA ChIP of *UAS-pangolin* shows enrichment of a *bona fide* Pan binding site at the *nkd* locus (Fang et al., 2006) while a control region remains unbound (p-value:0.0015). **(D and E)** *MS1096-Gal4*-driven *UAS-GFP* in early (D and D`) and late (E and E`) L3 larvae and an entire animal. **(F)** The wing pouch region is indicated by dashed lines, the arrow points toward one of the two wing discs, the asterisk indicates unspecific background fluorescence.

**Supplemental Figure S2: Direct comparison of RNAi knock-down phenotypes and misexpression phenotypes**. **(A)** The RNAi phenotype distributions of TFs belonging to specific RNA pol II occupancy bins (from the lowest to the highest 20% RNA pol II occupancy) are compared. RNA pol II DNA occupancy was used here as a proxy for the extent of TF expression. **(B)** TF misexpression versus knock-down of the same TF. Identical classes for both methods are boxed in red. Color-coding of the bars applies also to panel C. **(C)** Converse presentation of the data shown in B.

**Supplemental Figure S3: Evaluation of ChIP-seq data sets** **(A)** Gene expression based on RNA-seq data correlates well with RNA pol II DNA occupancy values: Pearson’s r for RNA pol II gene promoter – RNA, RNA pol II gene body – RNA, and RNA pol II gene promoter – RNA pol II gene body was respectively 0.60, 0.69, and 0.58.RNA pol II ChIP-seq and RNA-seq dot plots showing correlation between the two kinds of data types were generated as described in the Materials and Methods section. **(B)** Heat map representing the Pearson’s correlations between tag density of histone marks and RNA pol II, revealing that the profiles have the expected characteristics in that active marks tend to cluster together. The heat map was generated as described in Materials and Methods.

**Supplemental Figure S4: Additional histone modification clustering examples**.Genome browser view of indicated histone modifications for representative genes in clusters 1, 2, 3 and 6. The scale for all tracks represents the tag depth per bp, except for the RNA-seq data for which the log2 of (FPKM+1) is plotted. The black rectangle highlights the gene belonging to cluster 6. We further note that while certain regions appear to be enriched for H3K27me3, they are in fact too small to constitute actual H3K27me3 enrichment. Indeed, the particularity of the H3K27me3 mark is that it extends over large domains, which is why the findPeaks option was set to 5000 bp for H3K27me3 instead of the 500 bp used for all the other histone modification marks and RNA pol II.

**Supplemental Figure 5: H3K4me1 distribution around genes (A)** The relative enrichment of H3K4me1 in each gene feature in relation to the whole genome is shown, revealing that H3K4me1 is depleted in exonic and enriched in intronic regions, consistent with the literature. The CEAS tool was used to derive significance values (shown between parentheses). **(B)** Pie chart showing the distribution of H3K4me1-enriched regions over specific gene-related categories: “Promoter” (i.e. regions upstream of the TSS) and “Downstream” (i.e. regions downstream of the TES). Distances are shown between parentheses. Gene bodies are then divided into “UTR” regions (untranslated regions 3’ and 5’ UTRs), coding exons and introns. Enriched regions that do not fit into any of the categories are assigned to the “distal intergenic” group.

**Supplemental Figure S6: Comparison of wing disc and S2 cell data sets and correlation with chromatin states (A)** Clustering of all detected genes according to the distribution of four histone marks and RNA pol II in S2 cells based on data derived from the modENCODE Consortium (Kharchenko et al., 2011). We again found two clusters (also numbers 4 and 5) containing bivalently marked genes, indicating that this property is not restricted to complex tissues such as the wing disc. **(B)** Number of genes common among the wing disc (WD) and S2 cell clusters (S2). We found in general high gene overlap between each of the corresponding wing disc- and S2 cells-derived clusters. For example, respectively 87%, 70%, and 43% of genes belonging to wing disc clusters 1, 2, and 6 are located in the corresponding S2 clusters. As could be expected, the largest differences were observed for bivalently marked genes (clusters 4 and 5) which distributed somewhat evenly over the 6 S2 clusters. This result suggests that genes under tight regulatory control in the wing disc tend to be less restricted in S2 cells, consistent with the fact that wing discs contain almost double the number of transcriptionally silenced genes than S2 cells (based on the number of genes in cluster 6 for each), including many bivalently marked genes in S2 cells (clusters 4 and 5). **(C)** Bar plot representing the percentage of genes in each cluster covered by each of the “chromatin colors” as previously defined (Filion et al., 2010). If a gene was covered by more than one color, then only the color covering the largest part of the gene was retained. The resulting data are in line with expectations, further validating our clustering approach. Specifically, we found that the number of genes marked by yellow (i.e. housekeeping state) tend to decrease from clusters 1 to 6 with the number of genes falling in the black category (abundant repressive state) following the opposite pattern. In addition, clusters 4 and 5 contain the highest number of blue (Polycomb)-labeled genes with a further distinction between the subclusters with or without “H3K27me3” (a greater proportion of blue in the “with” subclusters), consistent with the involvement of Polycomb in establishing this repressive mark.

**Supplemental Figure S7:** **Comparison of histone modifications in whole larvae and wing discs at the third instar larval stage**. **(A)** Peaks of the indicated histone marks visualized by the USCS genome browser at the *ara* and *caup* loci (indicated on the bottom) representative for the bivalent gene class and **(B)** the silenced *Ubx-Abd-B* gene region. The modENCODE Consortium data from entire larvae is displayed on top, our wing disc-specific data below. The H3K4me1, H3K27ac, and H3K79me1-2-3 histone modifications are specifically enriched in the wing disc samples for actively transcribed genes, whereas the converse is true for repressed genes. **(C**, **D)** Global analysis of chromatin mark distribution around genes in cluster 4b in the wing disc (this study) and entire larvae (the modENCODE Consortium). The transcription start site (TSS) is at 0 on the X-axis with 1kb upstream and downstream occupancy plotted and with the X-axis representing the distance in bp from the TSS and the Y-axis representing the tag depth per bp.
