# Supplementary figures and images for: A large-scale, in vivo transcription factor screen defines bivalent chromatin as a key property of regulatory factors mediating Drosophila wing development
Source: PubMed Central journal article supplement — Genome Res. 2015 Apr;25(4):514–23. doi: 10.1101/gr.181305.114 (PMC4381523; doi:10.1101/gr.181305.114), 2015-04

# Supplemental Figure S1

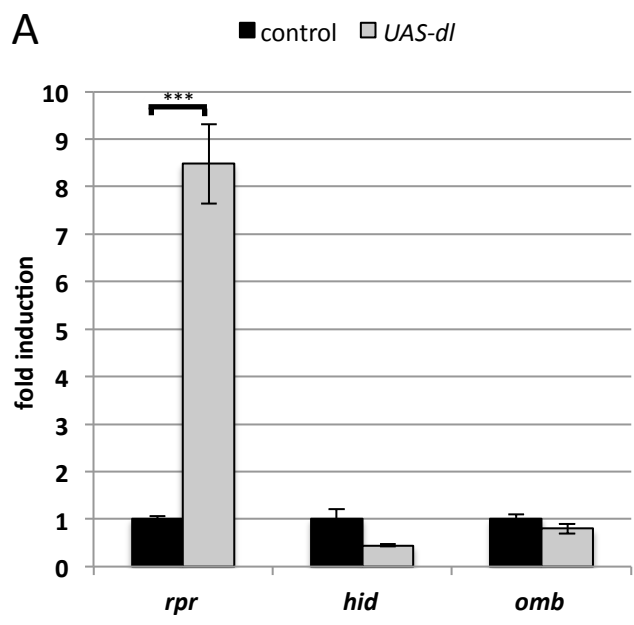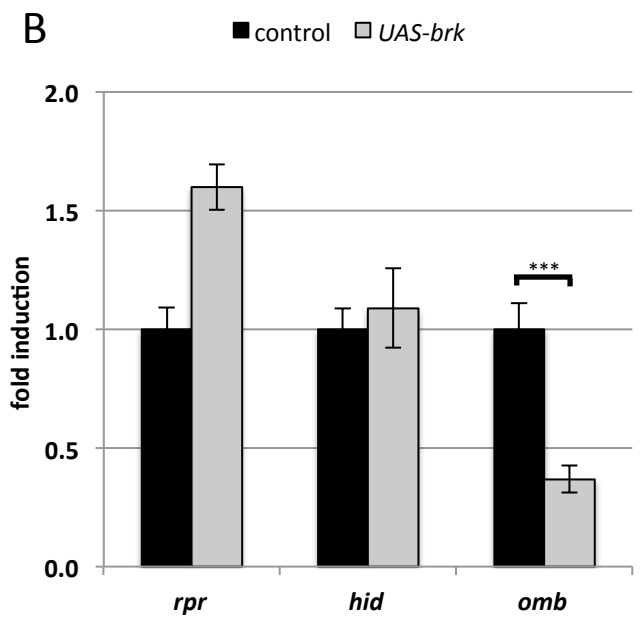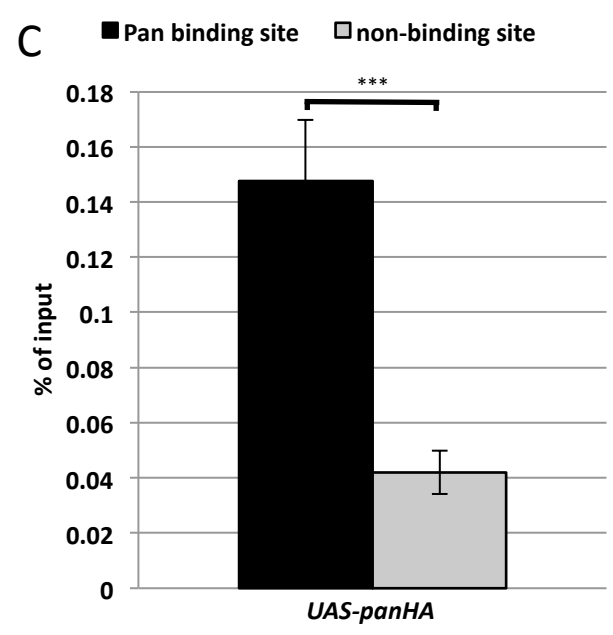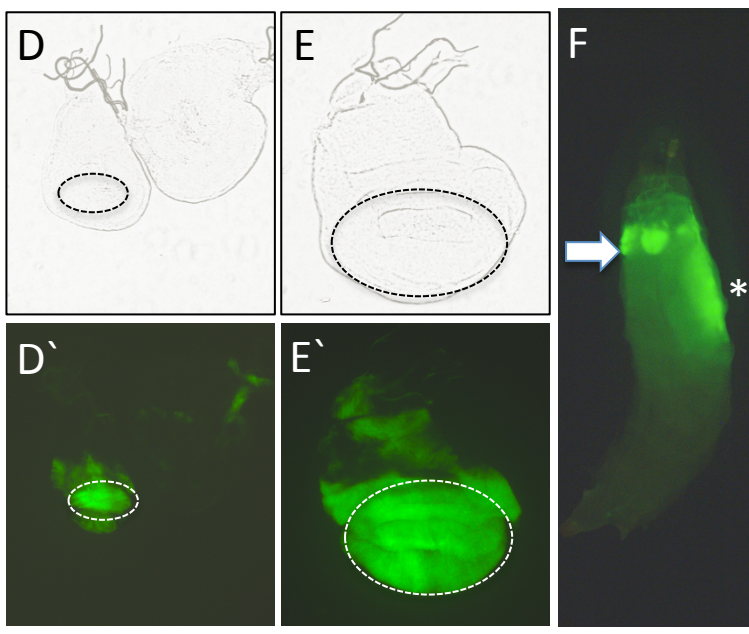

Supplement: supp_gr.181305.114_Supp_Figure1.pdf [file supp_gr.181305.114_Supp_Figure1.pdf]

# Supplemental Figure S2

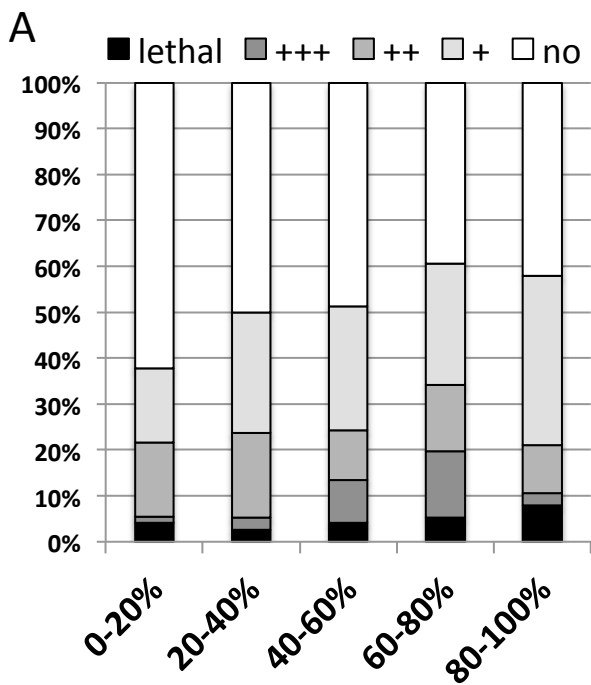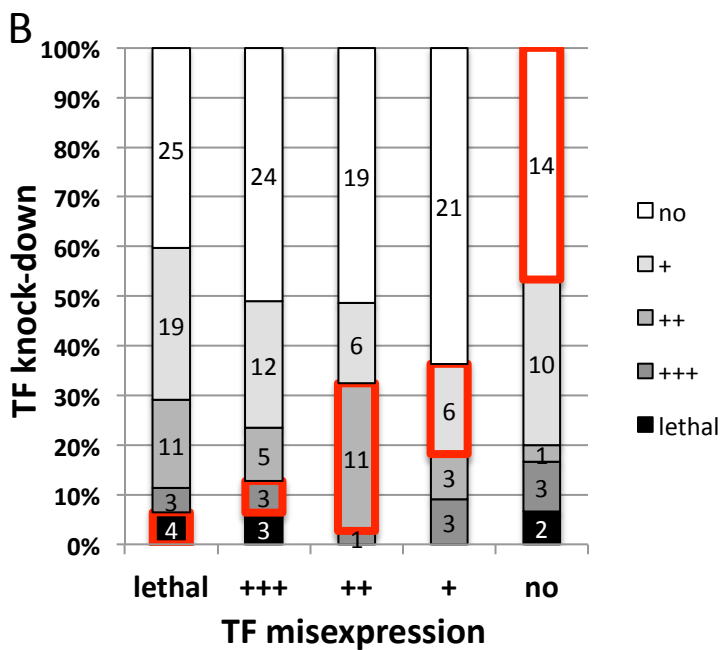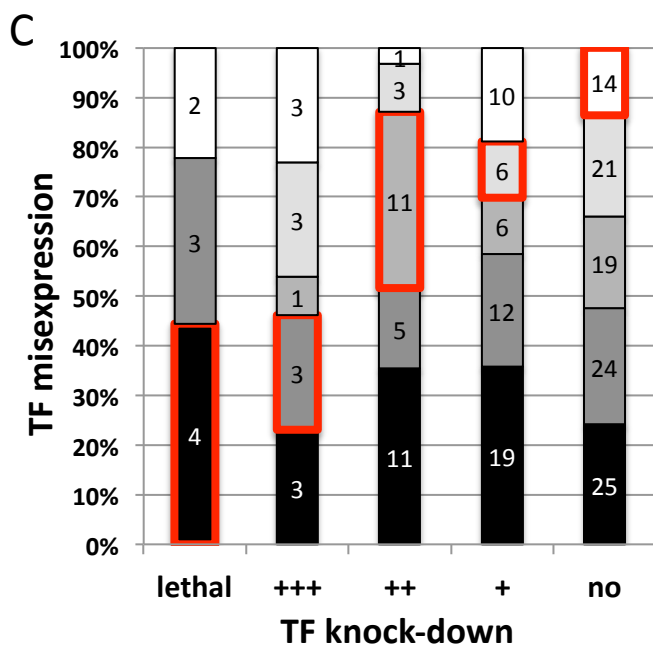

Supplement: supp_gr.181305.114_Supp_Figure2.pdf [file supp_gr.181305.114_Supp_Figure2.pdf]

# Supplemental Figure S3

A

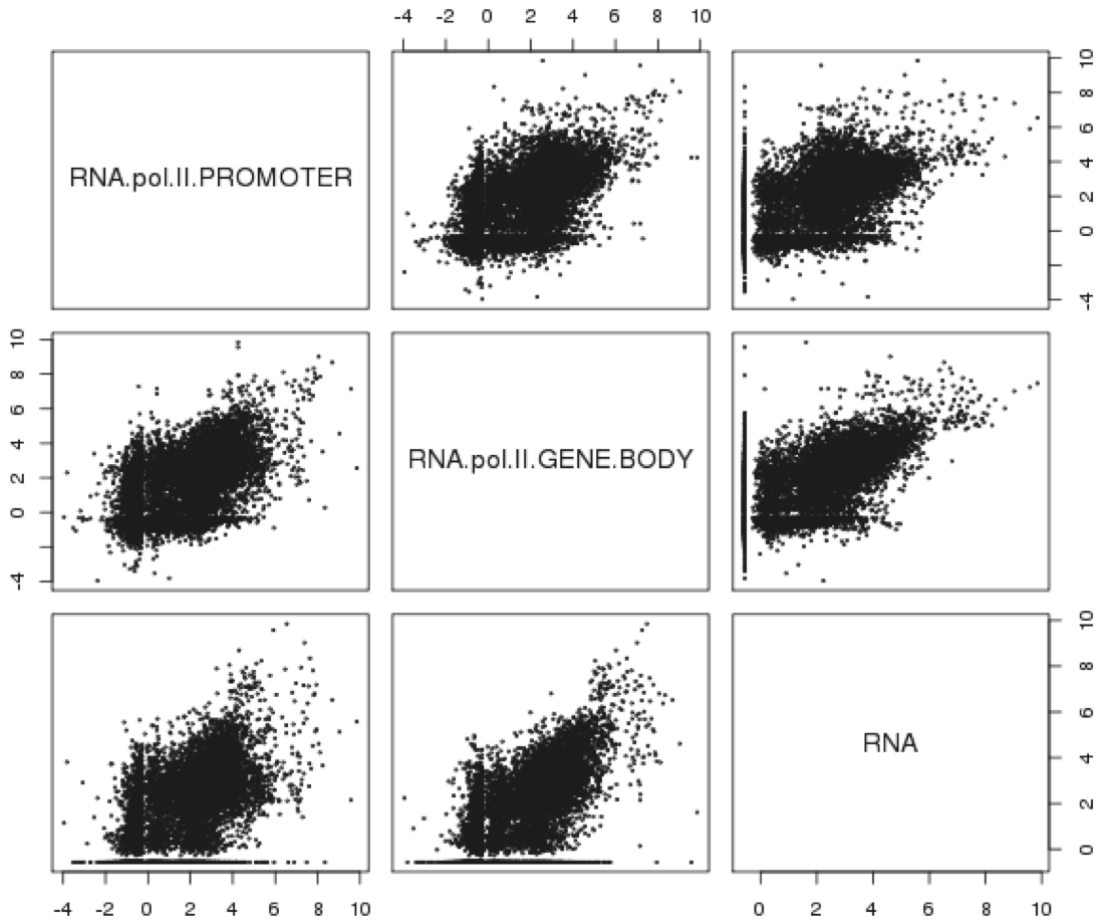

B

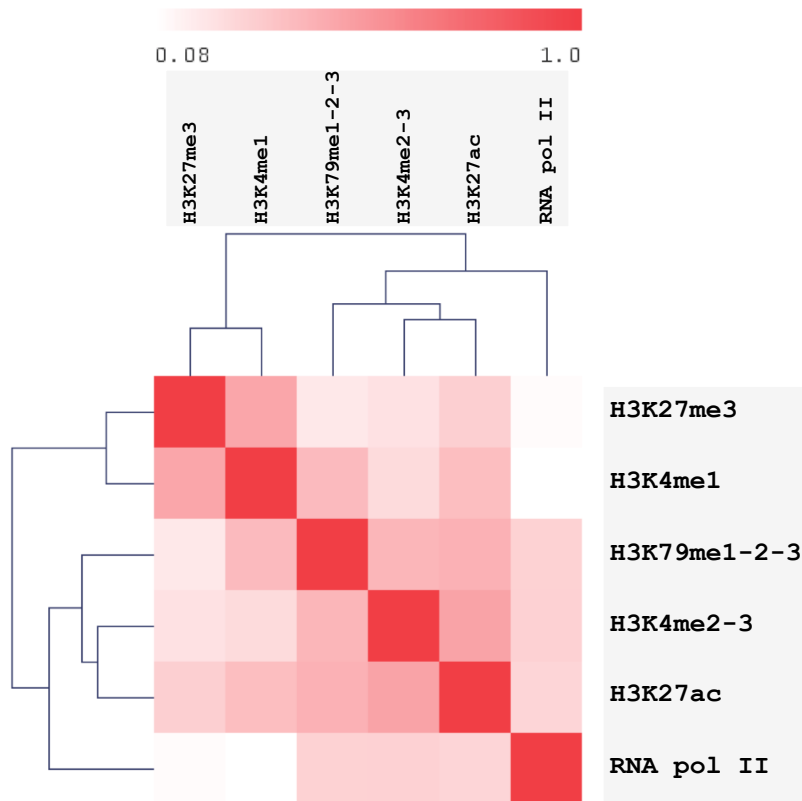

Supplement: supp_gr.181305.114_Supp_Figure3.pdf [file supp_gr.181305.114_Supp_Figure3.pdf]

# Supplemental Figure S4:

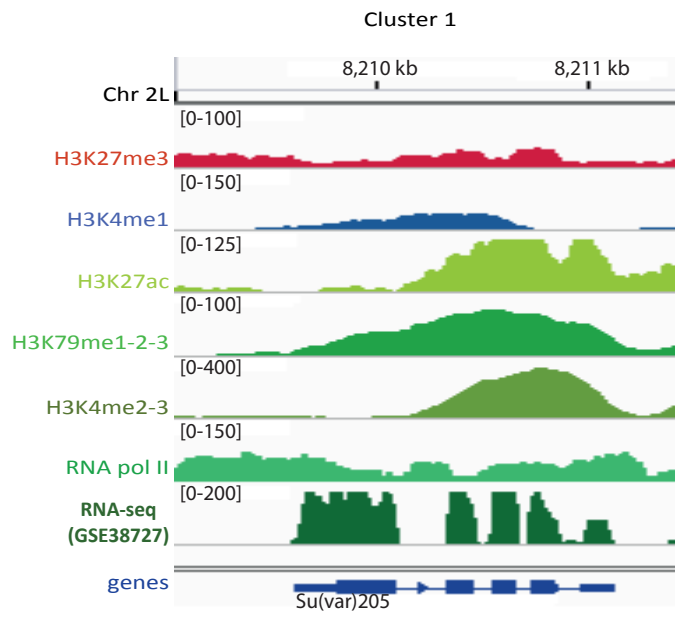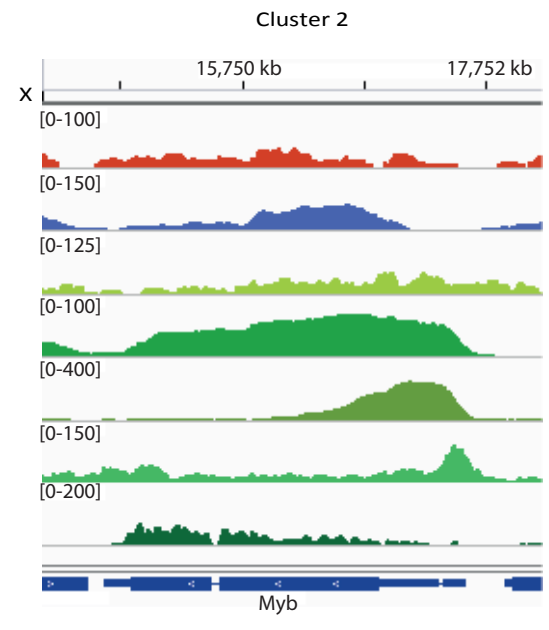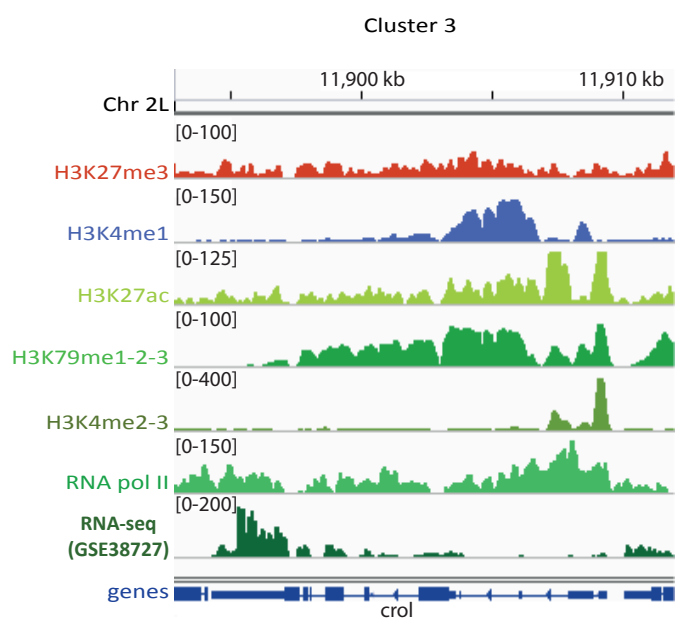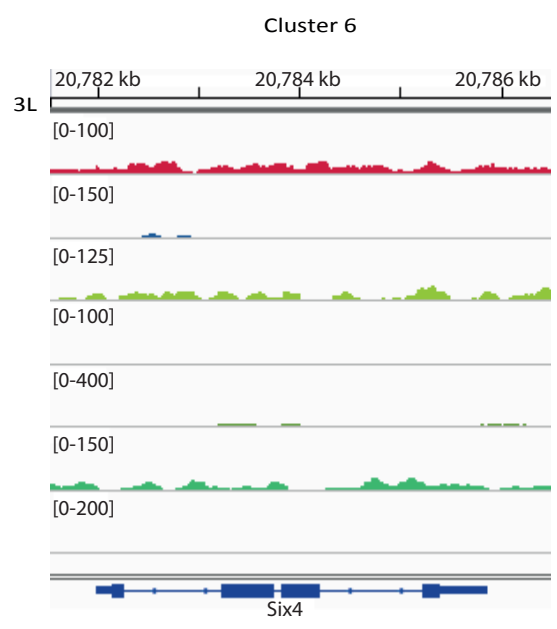

Supplement: supp_gr.181305.114_Supp_Figure4.pdf [file supp_gr.181305.114_Supp_Figure4.pdf]

# Supplemental Figure S5

A

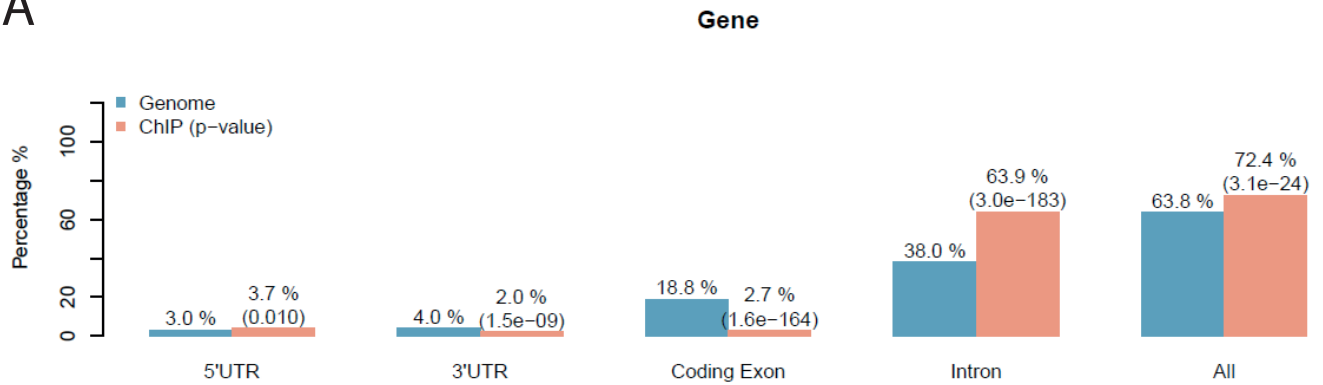

B

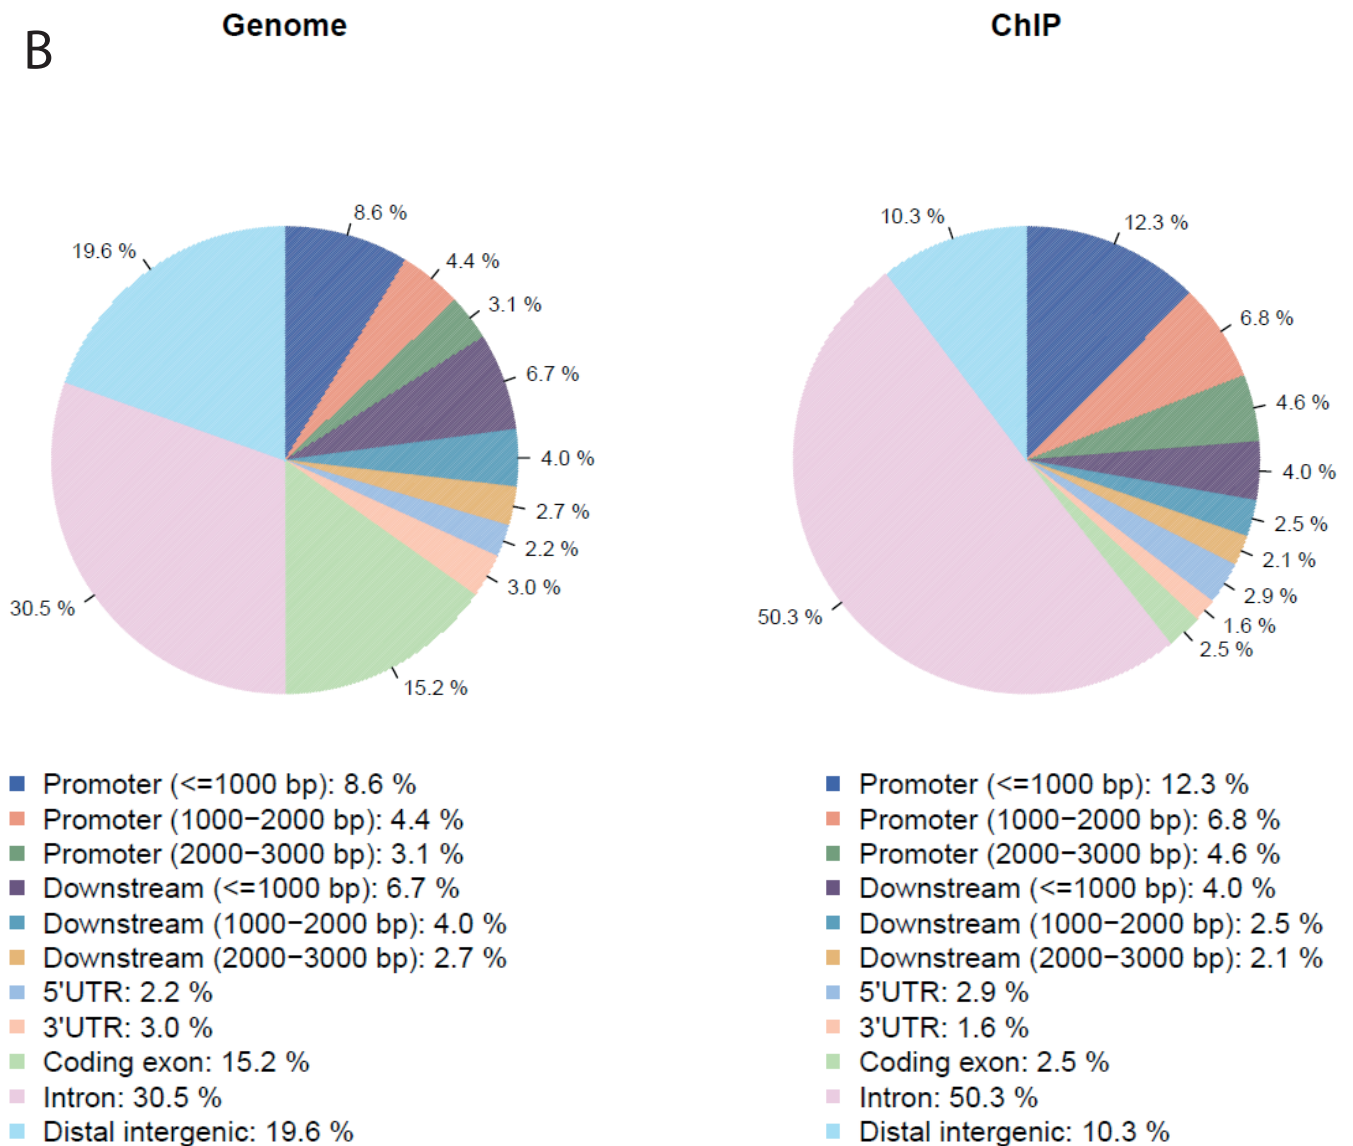

Supplement: supp_gr.181305.114_Supp_Figure5.pdf [file supp_gr.181305.114_Supp_Figure5.pdf]

# Supplemental Figure S7:

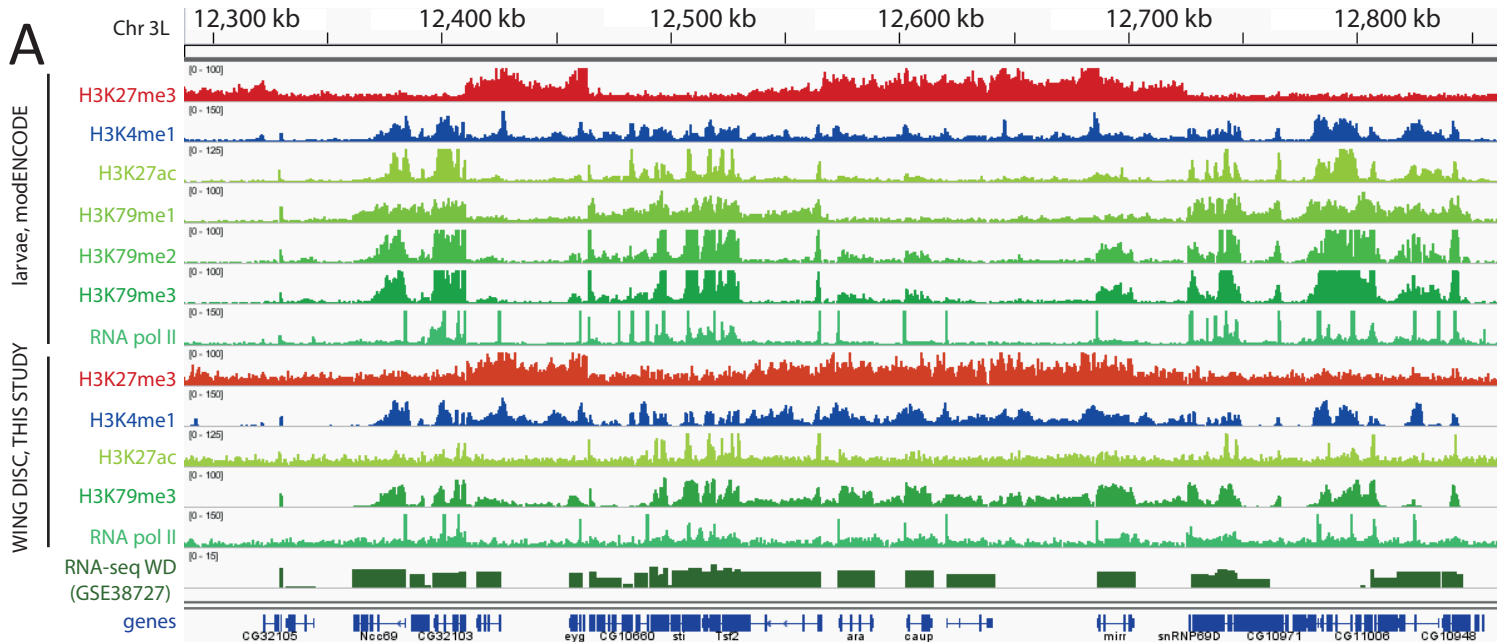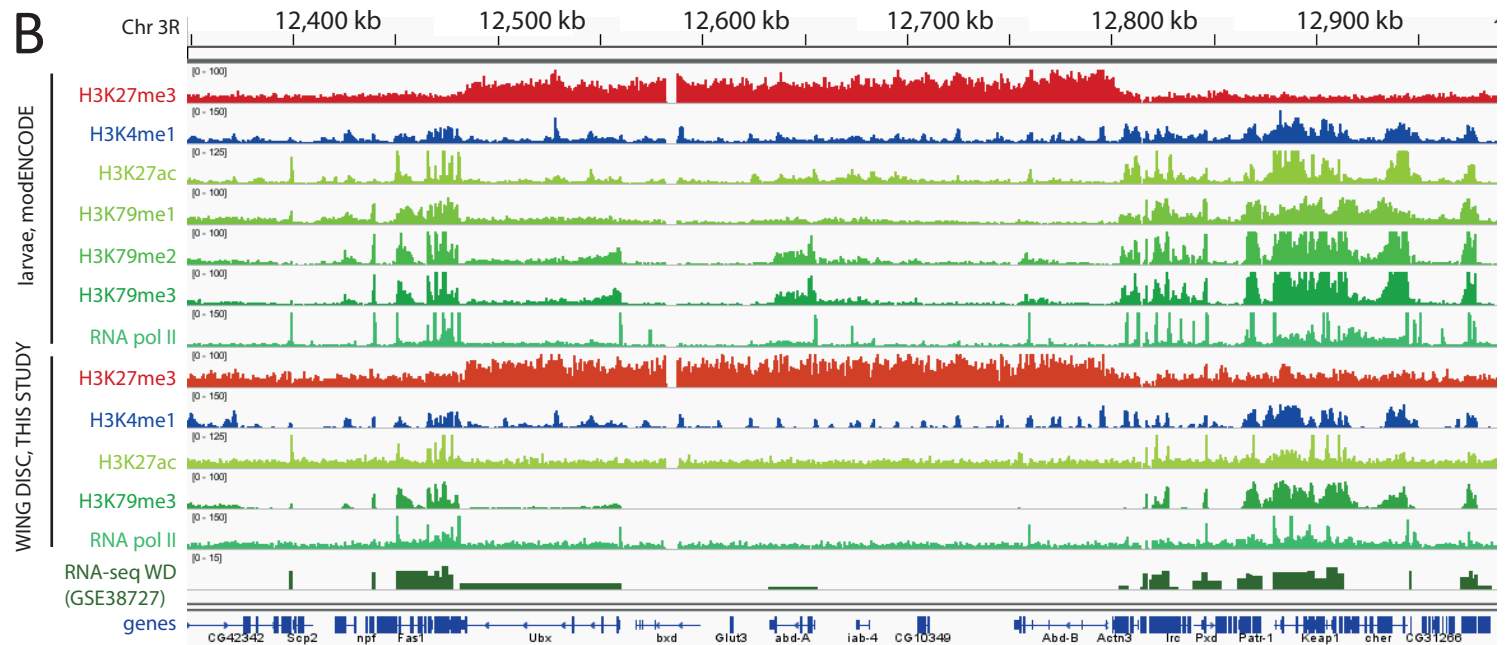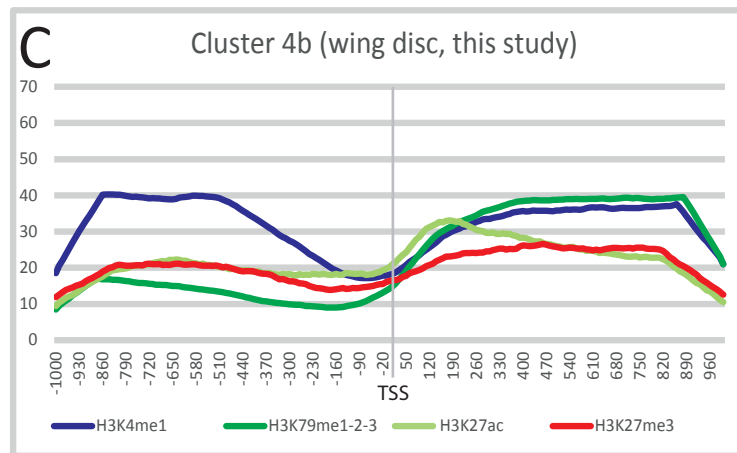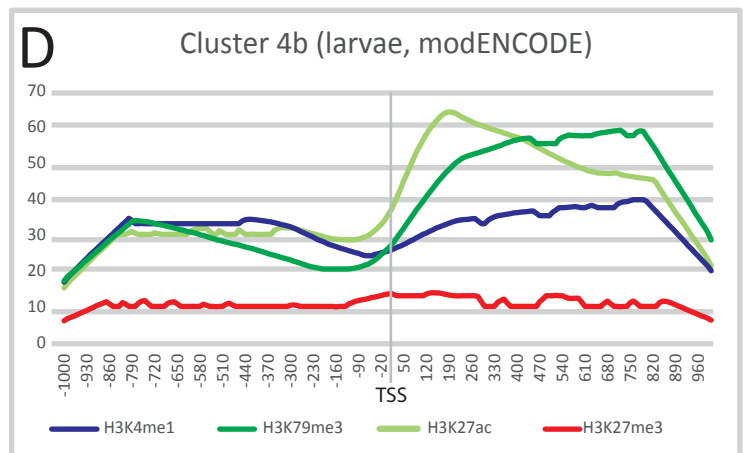

Supplement: supp_gr.181305.114_Supp_Figure7.pdf [file supp_gr.181305.114_Supp_Figure7.pdf]
